# Supplementary material for: NOCICEPTOR NEURONS CONTROL POLLUTION-MEDIATED NEUTROPHILIC ASTHMA
Source: bioRxiv preprint, doi:10.1101/2024.08.22.609202, version 3 (2025-12-08)
Supplement: Supplementary Table 1 [file 609202_file02.xlsx]

## Sheet: OVA-FPM vs OVA. All DEGs
baseMean	log2FoldChange	lfcSE	stat	pvalue	padj	gene
2182.81	0.44735	0.078669	5.68649	1.29675827372134e-08	0.000136328	St18
3871.09	-0.309272	0.0656628	-4.71	2.47715062475974e-06	0.0105487	Nrn1
334.517	-0.676805	0.144922	-4.67012	3.01020042088267e-06	0.0105487	Kcnv1
410.52	-0.711933	0.158716	-4.48559	7.27138098504093e-06	0.019111	Hspa1a
1248.91	0.403366	0.0952661	4.2341	2.29465679084389e-05	0.0482475	Oprm1
1292.73	0.331257	0.0807296	4.10329	4.07319758806193e-05	0.0713692	Kmt2d
2525	-0.310264	0.0775007	-4.00337	6.24454637944131e-05	0.0937842	Synpr
186.713	0.738643	0.188017	3.92861	8.54394824558861e-05	0.0976033	AI987944
333.1	-0.662014	0.169107	-3.91476	9.04937819695745e-05	0.0976033	Pcp4l1
746.686	-0.474386	0.122136	-3.88407	0.000102722	0.0976033	Prkcb
744.826	-0.371275	0.0958513	-3.87345	0.000107307	0.0976033	Rps25
2056.76	0.418951	0.108836	3.84936	0.000118425	0.0976033	Xist
97.9253	-0.951445	0.247468	-3.84471	0.000120693	0.0976033	S100a16
6406.3	-0.262351	0.0687433	-3.81639	0.00013542	0.100742	Nefh
425.337	0.452283	0.11897	3.80164	0.000143739	0.100742	Hipk2
3188.99	0.225172	0.0605257	3.72027	0.000199007	0.13076	Hectd1
1600.79	0.28431	0.0782715	3.63236	0.000280845	0.173678	Gan
624.308	0.386676	0.107552	3.59524	0.000324095	0.18929	Utp14b
654.278	0.36957	0.103764	3.56164	0.000368547	0.203923	Slc9a7
145.189	-0.895689	0.254046	-3.5257	0.000422371	0.212	Gabrb2
1417.38	-0.366977	0.104434	-3.51397	0.000441467	0.212	Dnajb1
1495.58	0.3012	0.085747	3.51266	0.000443641	0.212	Bbx
1820.23	-0.268522	0.0784208	-3.42412	0.000616788	0.281926	Sorl1
600.836	-0.374459	0.110141	-3.39981	0.000674335	0.283606	1110032F04Rik
1700.76	0.303874	0.0893807	3.39977	0.000674416	0.283606	Dock10
278.785	-1.37983	0.410344	-3.36262	0.00077206	0.305523	Gabra1
1327.94	0.332858	0.0992328	3.35431	0.000795625	0.305523	Ubc
1202.04	0.288176	0.0862678	3.34048	0.000836328	0.305523	Trim25
4867.79	-0.207412	0.0624777	-3.31978	0.000900894	0.305523	Thy1
347.41	-0.480094	0.144917	-3.31289	0.000923379	0.305523	Dusp6
1358.22	-0.371577	0.112173	-3.31253	0.000924552	0.305523	Piezo2
3563.98	0.202626	0.0611995	3.3109	0.000929967	0.305523	Bsn
713.597	0.347555	0.105951	3.28035	0.00103678	0.330293	Myl1
3324.41	0.255566	0.0783661	3.26118	0.00110952	0.337237	Rgs17
2983.39	0.2065	0.0635593	3.24894	0.00115838	0.337237	Etl4
907.981	-0.458862	0.142114	-3.22883	0.00124298	0.337237	P2ry1
3221.38	-0.33212	0.103008	-3.2242	0.00126324	0.337237	Cntn1
2076.5	-0.236134	0.0735132	-3.21213	0.00131755	0.337237	S100b
1153.69	-0.360996	0.112731	-3.20227	0.00136349	0.337237	Gm765
78713.2	0.210142	0.0657014	3.19844	0.00138173	0.337237	mt-Cytb
909.975	-0.422065	0.131976	-3.19804	0.00138366	0.337237	Gt(ROSA)26Sor
6026.51	0.189924	0.0595215	3.19085	0.00141857	0.337237	Dpysl2
3002.37	0.267862	0.0842403	3.17974	0.00147407	0.337237	Zbtb20
217.184	0.546826	0.171979	3.1796	0.00147477	0.337237	Zfp52
6521.06	0.232205	0.0731611	3.17388	0.00150415	0.337237	Tmc3
1382.92	0.276953	0.0874618	3.16656	0.00154252	0.337237	Trip11
1075.87	0.334069	0.105572	3.16436	0.00155422	0.337237	Mga
6841.69	0.246221	0.0778288	3.16362	0.00155819	0.337237	Kcnq3
334.649	0.460472	0.145669	3.16108	0.00157183	0.337237	Fosl2
782.614	-0.468768	0.148842	-3.14943	0.0016359	0.343965	Tac1
480.537	0.370131	0.11869	3.11848	0.00181787	0.374731	Rlf
439.546	-0.496635	0.159962	-3.10471	0.00190466	0.379213	Tmem255a
5832.05	0.235609	0.0759146	3.10361	0.00191175	0.379213	Cckar
3035.75	-0.201288	0.0650775	-3.09305	0.00198109	0.38569	Ccni
1366.16	-0.237724	0.0770798	-3.08412	0.00204154	0.390231	Ndufb10
2594.57	-0.188005	0.0617126	-3.04646	0.00231551	0.427623	Clta
229.473	-0.57632	0.189201	-3.04607	0.00231851	0.427623	Hopx
9455.67	0.152611	0.0502539	3.03679	0.0023911	0.429469	Disp2
788.132	-0.292307	0.0963314	-3.03439	0.00241022	0.429469	Cntnap1
2214.1	0.222275	0.07378	3.01268	0.00258952	0.443556	Kmt2a
1927.81	0.213271	0.0710198	3.00298	0.00267349	0.443556	Iqsec1
2524.78	-0.206236	0.0687593	-2.99939	0.00270523	0.443556	Fez1
962.01	-0.284232	0.0947717	-2.99912	0.00270756	0.443556	Atp5k
711.583	0.301598	0.100675	2.99574	0.00273777	0.443556	Itpr1
174.385	-0.62507	0.208689	-2.99522	0.00274243	0.443556	Gm7271
4050.38	-0.202392	0.0678612	-2.98244	0.00285959	0.455498	Cox4i1
694.448	0.336041	0.113073	2.9719	0.00295961	0.464394	Adamtsl3
4791.2	-0.212102	0.071674	-2.95927	0.00308374	0.476606	Alcam
3687.31	0.250556	0.0847945	2.95486	0.00312811	0.476606	Dgki
347.148	0.383985	0.130829	2.93501	0.0033354	0.495641	Per1
1160.31	0.255167	0.0869718	2.9339	0.00334733	0.495641	Med13
3519.09	0.202262	0.0690871	2.92764	0.00341544	0.498702	Prrc2c
108.577	0.668452	0.229317	2.91497	0.0035572	0.505042	Mtrf1l
5304.12	0.18911	0.0648851	2.91453	0.00356219	0.505042	Dmxl2
2837.15	0.231189	0.0797285	2.8997	0.00373524	0.505042	Chrnb4
284.306	0.423704	0.146184	2.89842	0.00375043	0.505042	Cep97
1548.3	-0.33728	0.116439	-2.89663	0.00377191	0.505042	Fabp7
1089.35	-0.245709	0.084833	-2.89639	0.00377487	0.505042	Chchd2
549.996	-0.304042	0.105034	-2.89471	0.00379514	0.505042	Rtkn
1912.91	0.203908	0.0706873	2.88465	0.0039185	0.507905	Ncoa2
2163.27	0.200321	0.0694814	2.88308	0.00393802	0.507905	Ago2
339.558	-0.404373	0.140378	-2.8806	0.0039692	0.507905	Tob1
997.481	0.310002	0.107737	2.87738	0.0040099	0.507905	Gria3
1486.52	-0.274374	0.0955214	-2.87238	0.00407389	0.509867	Lrrn1
3177.72	0.181918	0.0636796	2.85677	0.00427977	0.529331	Abca5
676.784	-0.284712	0.0999768	-2.84779	0.00440246	0.529508	Htra1
702.73	-0.801067	0.281574	-2.84497	0.0044416	0.529508	Hspa1b
432.556	0.336824	0.118427	2.84414	0.0044531	0.529508	Nhsl2
1334.67	-0.284543	0.100119	-2.84203	0.00448266	0.529508	Olfm3
879.58	0.269907	0.095092	2.83838	0.0045343	0.529656	Rcbtb1
285.916	0.409719	0.145166	2.82242	0.00476631	0.542102	Kcnn3
262.663	-0.476428	0.168807	-2.82233	0.00476768	0.542102	Amigo3
1394.85	-0.213892	0.0758359	-2.82046	0.00479554	0.542102	Abcf2
793.168	0.285841	0.101581	2.81393	0.00489399	0.54581	Ino80d
2521.77	0.196383	0.0698995	2.80951	0.00496165	0.54581	Cacna1c
370.986	-0.352469	0.125521	-2.80806	0.00498409	0.54581	Chchd1
787.499	0.261581	0.0936804	2.79227	0.00523394	0.565671	Prr14l
254.592	0.489032	0.175572	2.78537	0.00534665	0.565671	Cd109
1335.25	0.222849	0.0800628	2.78343	0.00537876	0.565671	Slmap
38073.5	0.181033	0.0650424	2.78331	0.00538069	0.565671	Ank2
1124.59	0.295208	0.10636	2.77555	0.00551085	0.5698	Rsf1
25277.4	-0.14467	0.0521423	-2.77452	0.00552836	0.5698	Nefl
3235.91	0.19361	0.0706315	2.74113	0.00612279	0.616986	Tanc2
1146.92	0.222938	0.0814239	2.738	0.00618148	0.616986	Srrm4
9145.44	0.211834	0.0775552	2.7314	0.0063066	0.616986	Usp9x
4967.38	-0.213472	0.0781674	-2.73096	0.00631493	0.616986	Cd9
689.378	0.276345	0.10122	2.73013	0.00633096	0.616986	Pde10a
2052.19	-0.178046	0.0652575	-2.72836	0.00636496	0.616986	Hdgf
671.235	0.306454	0.112433	2.72567	0.00641707	0.616986	Arhgap31
393.655	0.385745	0.141626	2.72369	0.00645567	0.616986	Osmr
12163.5	0.16922	0.0623909	2.71225	0.00668277	0.626344	F2r
110.056	-0.732834	0.270281	-2.71138	0.00670038	0.626344	Lin52
3398.01	0.17558	0.0648958	2.70557	0.00681877	0.626344	Lonrf2
690.987	-0.28284	0.104556	-2.70516	0.00682721	0.626344	Selenom
2103.71	0.191097	0.0707027	2.70283	0.00687529	0.626344	Grin3a
398.029	0.339889	0.125833	2.7011	0.00691105	0.626344	Flrt1
383.643	-0.40812	0.151389	-2.69583	0.00702125	0.630892	Lgi4
476.321	-0.334258	0.124205	-2.69118	0.00712008	0.631632	Lypla1
2513.43	-0.189886	0.0706172	-2.68895	0.00716777	0.631632	Cmpk1
371.071	-0.389632	0.145034	-2.68649	0.00722075	0.631632	Arxes2
6991.92	0.1823	0.0679154	2.68423	0.00726981	0.631632	Pcsk1
815.282	0.264469	0.0987428	2.67836	0.0073983	0.637527	Chst2
1329.16	-0.230836	0.0863158	-2.67432	0.00748802	0.640013	Rack1
2402.3	0.185456	0.0694445	2.67056	0.00757239	0.641765	Frmpd4
115375	0.145912	0.0547147	2.66678	0.00765823	0.641765	mt-Co1
88.8312	-0.704478	0.264313	-2.66531	0.00769166	0.641765	Zfp36l2
175.681	-0.527472	0.198297	-2.66002	0.00781369	0.646813	Ccn3
160.759	0.49616	0.187106	2.65177	0.00800722	0.65391	Zfp932
1312.5	-0.303784	0.114794	-2.64635	0.00813657	0.65391	Cpne4
1257	0.267732	0.101206	2.6454	0.00815936	0.65391	Slc8a1
6321.88	-0.141195	0.0534358	-2.64234	0.00823364	0.65391	Ppp3ca
1554.94	-0.208707	0.0791382	-2.63725	0.00835816	0.65391	B2m
2226.16	0.185356	0.0703398	2.63515	0.00841012	0.65391	Mpdz
454.671	0.319326	0.121375	2.63091	0.00851573	0.65391	Cdh18
940.793	-0.236667	0.0900109	-2.62931	0.00855575	0.65391	Ppm1g
1109.09	-0.238503	0.0907537	-2.62802	0.00858824	0.65391	Dok4
206.201	-0.454269	0.172898	-2.62738	0.00860445	0.65391	Necab3
74577.7	0.174629	0.066528	2.62489	0.00866762	0.65391	mt-Nd5
26982.2	0.150506	0.0573911	2.62246	0.00872978	0.65391	mt-Nd4
7334.69	0.180489	0.0688564	2.62124	0.00876106	0.65391	Mycbp2
8143.77	0.183945	0.070247	2.61854	0.0088306	0.65391	Lrpprc
378.66	0.336849	0.128666	2.618	0.00884459	0.65391	Gm1043
1197.73	0.21371	0.0816909	2.61608	0.00889462	0.65391	C1ql3
963.718	0.233081	0.0891836	2.6135	0.00896203	0.654291	Cplane1
2197.74	-0.184612	0.0707345	-2.60993	0.00905617	0.656366	H2-D1
2213.54	0.195599	0.0750085	2.6077	0.00911533	0.656366	Rc3h1
747.623	0.289801	0.11124	2.60518	0.00918262	0.656714	Parg
637.098	0.277089	0.106524	2.60117	0.00929051	0.659256	Arid5b
190.517	0.45149	0.173855	2.59693	0.00940622	0.659256	Tet2
163.907	0.627568	0.241658	2.59692	0.00940629	0.659256	Apopt1
3195.84	-0.152676	0.058999	-2.58777	0.00965993	0.668992	Rnf11
1689.31	-0.199025	0.0769621	-2.58602	0.00970915	0.668992	Lix1
212.459	-0.5919	0.22915	-2.58302	0.00979392	0.668992	Nptx1
1821.93	0.205875	0.0797097	2.58282	0.00979975	0.668992	Tnrc6b
1034.85	-0.216577	0.083983	-2.57882	0.00991388	0.671015	Cox7a2l
677.513	-0.325072	0.126175	-2.57636	0.00998477	0.671015	Cdh6
425.323	-0.324473	0.12617	-2.57172	0.0101195	0.671015	Thoc3
1019.75	0.34019	0.132305	2.57126	0.010133	0.671015	Uts2b
2558.3	-0.173393	0.067449	-2.57073	0.0101485	0.671015	Hint1
235.097	0.399082	0.155467	2.56699	0.0102585	0.674049	Lmtk3
95.6196	0.643309	0.251519	2.55769	0.0105369	0.682845	Zfp619
411.119	-0.415417	0.162556	-2.55552	0.0106028	0.682845	Gabra2
365.082	0.33114	0.129778	2.55158	0.0107235	0.682845	Guf1
157.71	-0.520005	0.204011	-2.5489	0.0108063	0.682845	D930028M14Rik
2078.56	0.185533	0.0728141	2.54804	0.0108331	0.682845	Agap1
392.642	-0.327274	0.128509	-2.5467	0.0108746	0.682845	Gon4l
97.3753	-0.941286	0.369742	-2.54579	0.0109031	0.682845	Npas4
2965.47	0.258563	0.101587	2.54522	0.0109207	0.682845	Sacs
6277.95	-0.234662	0.0922621	-2.54343	0.010977	0.682845	Fos
1916.79	-0.221033	0.087018	-2.54008	0.0110828	0.683712	Rps3
1307.78	-0.198466	0.0781811	-2.53854	0.0111316	0.683712	Dazap2
747.171	-0.331347	0.130615	-2.53683	0.011186	0.683712	Gatm
354.488	0.491754	0.194357	2.53016	0.0114009	0.692821	Mt1
384.154	-0.310932	0.12313	-2.52524	0.0115619	0.696194	Uqcc2
446.052	-0.304683	0.120694	-2.52442	0.0115889	0.696194	Nipsnap3b
10838.4	-0.126464	0.0501897	-2.51971	0.0117451	0.701569	Rgs4
1772.3	-0.181638	0.0721515	-2.51745	0.0118208	0.702103	Crhr2
2118.77	0.17257	0.0687011	2.51189	0.0120086	0.709247	Tmem178b
501.075	-0.322537	0.128812	-2.50393	0.0122824	0.721367	Brinp1
387.098	0.330392	0.132405	2.49531	0.0125848	0.735024	Zfp971
430.06	0.300014	0.120525	2.48923	0.0128022	0.743588	Wnk3
1651.71	0.219403	0.0882644	2.48575	0.0129278	0.745841	Rc3h2
952.897	0.218743	0.0881069	2.4827	0.0130391	0.745841	Brwd1
120.915	-0.580899	0.234277	-2.47954	0.0131553	0.745841	Sorcs2
516.233	-0.276744	0.111631	-2.47909	0.0131717	0.745841	Urod
2514.91	-0.248501	0.100375	-2.47573	0.0132966	0.745841	Tmem233
1938.13	0.222392	0.0898948	2.47392	0.013364	0.745841	Cdc27
1228.42	0.194415	0.0786744	2.47113	0.0134687	0.745841	Sec63
5388.3	-0.149622	0.0605523	-2.47095	0.0134753	0.745841	Ctsl
475.39	-0.343774	0.139132	-2.47084	0.0134795	0.745841	Klhl5
177.171	-0.474268	0.192717	-2.46096	0.0138567	0.754234	Sel1l3
886.725	0.255838	0.103982	2.46042	0.0138775	0.754234	Mical3
2179.44	-0.170584	0.0693343	-2.46031	0.0138815	0.754234	Selenof
703.423	-0.264256	0.107449	-2.45937	0.0139181	0.754234	Fxyd7
147.021	-0.491398	0.200077	-2.45604	0.0140477	0.75735	Gps2
874.318	0.305881	0.124655	2.45382	0.0141349	0.758165	Clk1
9874.48	0.141783	0.0578267	2.45186	0.014212	0.758428	Lifr
701.838	0.240035	0.0981833	2.44476	0.0144948	0.762743	Spen
196.042	-0.471492	0.192906	-2.44415	0.0145194	0.762743	Myo1a
418.477	-0.305027	0.125034	-2.43956	0.0147054	0.762743	Serpina3g
1168.17	0.193357	0.0792683	2.43927	0.0147169	0.762743	Strn
644.895	0.253565	0.104074	2.43639	0.0148348	0.762743	Cdk12
1567.76	-0.179622	0.0737406	-2.43587	0.0148561	0.762743	Os9
4286.16	0.148762	0.0610966	2.43487	0.0148973	0.762743	Atp8a2
1099.75	0.263007	0.108022	2.43476	0.0149018	0.762743	Zfc3h1
586.277	-0.283901	0.116655	-2.43369	0.0149459	0.762743	Sytl2
330.778	-0.347248	0.142787	-2.43194	0.0150183	0.762743	Supt3
845.7	-0.237777	0.0982265	-2.4207	0.0154906	0.782947	Pak1ip1
305.669	-0.347241	0.143681	-2.41676	0.0156595	0.787139	Ssr4
2959.04	-0.155147	0.0642356	-2.41528	0.0157233	0.787139	Eid1
1704.65	0.242393	0.100504	2.41178	0.0158748	0.787913	Smg1
831.113	0.244695	0.101523	2.41024	0.0159419	0.787913	Phip
137.189	-0.553942	0.22998	-2.40865	0.0160116	0.787913	Asic3
950.773	0.213178	0.0885675	2.40695	0.0160862	0.787913	Abl2
409.773	-0.351874	0.146288	-2.40535	0.0161571	0.787913	Tma7
6932.16	0.183368	0.0762967	2.40335	0.0162456	0.787913	Srrm2
164.699	0.45608	0.1898	2.40295	0.0162634	0.787913	Bicra
397.202	0.290272	0.120906	2.4008	0.0163591	0.788916	Ggta1
1008.51	0.214385	0.089523	2.39475	0.0166316	0.792922	Cep250
1417.25	-0.180247	0.075326	-2.39289	0.0167162	0.792922	Aldh2
2370.01	0.153737	0.0642687	2.39209	0.0167525	0.792922	Cbl
2114.43	-0.162719	0.0680544	-2.39102	0.0168016	0.792922	Ubb
5233.05	-0.156091	0.0653051	-2.39018	0.0168399	0.792922	Pmp22
61336.9	0.140238	0.058702	2.38899	0.0168948	0.792922	mt-Nd1
1003.07	0.200669	0.0840986	2.38611	0.0170277	0.79421	Zbtb38
527.416	0.275857	0.11567	2.38487	0.0170852	0.79421	Pitpnm3
684.08	0.25784	0.108211	2.38276	0.0171834	0.79421	Eml6
3429.93	0.17939	0.0753145	2.38188	0.0172244	0.79421	Cep170
1481.69	0.185522	0.0779533	2.37992	0.0173165	0.794973	Nsd3
9333.78	0.135665	0.057083	2.37662	0.0174719	0.798018	Fam102b
3168.69	-0.156396	0.0658428	-2.3753	0.0175347	0.798018	Pcsk2
433.347	-0.348104	0.146917	-2.36939	0.0178175	0.801936	Tspan2
119.304	-0.514708	0.217323	-2.3684	0.0178652	0.801936	Fbxl15
1937.24	-0.194414	0.0820898	-2.36831	0.0178696	0.801936	Maoa
1546.72	-0.186026	0.0785867	-2.36715	0.0179259	0.801936	Psmd4
1818.06	0.163644	0.0692679	2.36248	0.0181529	0.803528	Klf13
2648.05	-0.152181	0.0645895	-2.35613	0.0184664	0.803528	Gsn
1133.17	0.18858	0.0800494	2.35579	0.0184834	0.803528	Kansl1
176.524	-0.46884	0.199107	-2.35472	0.0185368	0.803528	Nt5e
22686.3	0.127021	0.0539873	2.35279	0.0186333	0.803528	Sv2c
240.262	0.448607	0.190727	2.35209	0.0186684	0.803528	Fam107a
2031.9	-0.199285	0.0847547	-2.35131	0.0187073	0.803528	Impad1
597.437	0.297264	0.12651	2.34974	0.0187868	0.803528	Zfp462
240.087	0.36028	0.153412	2.34844	0.0188522	0.803528	Ccdc66
956.7	0.22858	0.0973362	2.34836	0.0188564	0.803528	Gas7
2092.58	0.239533	0.10206	2.34697	0.0189266	0.803528	Akap9
234.108	-0.367042	0.156425	-2.34644	0.0189535	0.803528	Mcrs1
2929.36	-0.147669	0.0629338	-2.34641	0.0189551	0.803528	Arl6ip5
913.209	-0.205891	0.0878068	-2.34481	0.0190366	0.803741	Tcta
405.039	-0.294929	0.126091	-2.33902	0.0193342	0.811312	Slc24a3
1583.76	0.212096	0.0907222	2.33786	0.0193946	0.811312	Ash1l
6030.84	0.189702	0.0811788	2.33684	0.0194474	0.811312	Syne1
202.851	0.388651	0.166697	2.33148	0.0197282	0.819774	Eif2s3x
3213.97	-0.158561	0.0680623	-2.32964	0.0198249	0.820549	Rab15
1923.21	0.177485	0.0762871	2.32654	0.01999	0.823957	Golga4
693.187	0.229593	0.0988022	2.32377	0.0201379	0.823957	Ascc3
99.9316	-0.839281	0.361185	-2.32368	0.0201424	0.823957	Sp100
1488.22	-0.172907	0.0745647	-2.31888	0.0204014	0.828254	Psma7
777.23	0.227475	0.0981191	2.31836	0.0204297	0.828254	Zc3h13
7737.98	-0.12554	0.0541737	-2.31737	0.0204838	0.828254	Cfl1
761.389	-0.331117	0.143109	-2.31375	0.0206816	0.830015	Ntrk1
217.246	-0.392841	0.169877	-2.3125	0.0207503	0.830015	Kitl
804.74	-0.224217	0.0969694	-2.31225	0.0207642	0.830015	Tceal9
267.212	0.449192	0.194702	2.30708	0.0210504	0.837137	Adamts1
2642.56	0.181774	0.0788396	2.30562	0.0211318	0.837137	Nfat5
2816.84	0.190659	0.082725	2.30474	0.0211813	0.837137	Vps13c
152.157	-0.439448	0.190826	-2.30287	0.021286	0.838128	Coq6
485.272	-0.282794	0.122924	-2.30056	0.0214166	0.840124	Stat1
846.11	-0.227166	0.098832	-2.2985	0.0215331	0.841551	Preb
10465.8	-0.11155	0.0486023	-2.29515	0.0217247	0.84545	Rab6a
742.431	-0.248657	0.108397	-2.29394	0.0217937	0.84545	Nrxn3
1602.29	0.195118	0.0852115	2.28981	0.0220323	0.84913	Atp11b
1289.75	-0.202349	0.0884529	-2.28765	0.0221579	0.84913	Itga7
2832.46	0.187151	0.0818926	2.28533	0.0222937	0.84913	Elovl6
333.204	0.354331	0.155101	2.28451	0.0223413	0.84913	E2f3
3139.84	0.144627	0.0633226	2.28398	0.022373	0.84913	Cbx5
2855.74	0.196417	0.0860009	2.2839	0.0223775	0.84913	Amigo2
694.826	0.23807	0.104406	2.28023	0.022594	0.84913	Celsr2
1345.08	0.191877	0.0841724	2.27957	0.0226333	0.84913	Scn5a
135.426	0.490337	0.215321	2.27724	0.0227717	0.84913	Zfp982
104.502	-0.663965	0.291853	-2.275	0.0229059	0.84913	Ly6e
202.561	0.43614	0.191766	2.27434	0.0229456	0.84913	Simc1
662.253	0.242232	0.106651	2.27125	0.0231321	0.84913	Eml5
631.429	0.257394	0.113367	2.27045	0.0231803	0.84913	Slc45a3
237.492	-0.351362	0.154762	-2.27034	0.0231871	0.84913	Anxa11
227.153	0.413608	0.182194	2.27015	0.0231987	0.84913	Pan2
6829.12	0.176618	0.0778157	2.2697	0.023226	0.84913	Apc
1814.71	0.162796	0.0717444	2.26911	0.0232616	0.84913	Iqsec3
1012.83	0.204108	0.0901074	2.26517	0.0235024	0.852156	Mdm4
2415.32	-0.201388	0.0889094	-2.2651	0.0235066	0.852156	Laptm4a
1711.51	0.205127	0.0906471	2.26292	0.0236405	0.852925	Th
7426.38	0.136836	0.0605081	2.26145	0.0237316	0.852925	Arfgef3
833.821	-0.265936	0.117629	-2.26081	0.0237712	0.852925	Gm49336
1074.73	-0.195197	0.0864367	-2.25827	0.0239288	0.853988	Ptn
11235.9	0.168911	0.0748148	2.25772	0.0239633	0.853988	Map2
538.294	-0.252355	0.111843	-2.25633	0.0240501	0.854185	Ctsf
2429.41	0.170431	0.075584	2.25486	0.024142	0.854563	Nsd1
607.108	-0.234372	0.104062	-2.25223	0.024308	0.854936	Mrpl10
1206.71	0.182552	0.0810885	2.25127	0.0243686	0.854936	Dnajc3
479.804	-0.270443	0.12023	-2.24938	0.0244882	0.854936	Sap30bp
14971.1	0.157049	0.0698369	2.24879	0.0245258	0.854936	Rab3c
1984.12	0.21933	0.0976388	2.24634	0.0246824	0.854936	Miat
143.441	-0.597576	0.266136	-2.24538	0.0247437	0.854936	Trpm8
207.916	0.450608	0.200712	2.24505	0.024765	0.854936	Mafk
1627.91	0.184709	0.0822955	2.24445	0.0248032	0.854936	Zfp804a
1230.76	0.180419	0.0805797	2.23902	0.0251548	0.861251	Itsn1
179.261	-0.599141	0.268062	-2.23508	0.0254119	0.861251	Prdm12
93.2271	-0.55852	0.249942	-2.2346	0.0254436	0.861251	Otud1
7471.21	0.135368	0.0605947	2.23398	0.0254841	0.861251	Herc1
12134	0.133279	0.0596599	2.23397	0.0254847	0.861251	Rbms3
464.289	-0.307088	0.137516	-2.23311	0.0255419	0.861251	Asic1
990.177	-0.196117	0.0878333	-2.23284	0.0255598	0.861251	Xbp1
6495.8	0.14682	0.0658709	2.22891	0.02582	0.861351	Nos1
200.747	0.389396	0.174759	2.22819	0.0258676	0.861351	Mgat5b
554.308	-0.248558	0.111566	-2.22789	0.0258877	0.861351	Pfdn4
692.355	0.227162	0.102	2.22708	0.0259422	0.861351	Ksr2
154.445	-0.440536	0.197879	-2.22629	0.0259947	0.861351	H2afj
465.735	0.265093	0.119122	2.2254	0.0260544	0.861351	Atxn1
488.081	0.271858	0.1223	2.22288	0.026224	0.861556	Ptchd1
1299.11	0.205334	0.0924313	2.22147	0.026319	0.861556	Kmt2c
270.06	-0.384253	0.173092	-2.21994	0.0264231	0.861556	Gm38393
245.688	0.347339	0.156521	2.21911	0.026479	0.861556	Zfp37
360.011	-0.32464	0.146315	-2.21878	0.0265018	0.861556	Sptssa
1380.98	0.17366	0.0782942	2.21804	0.0265523	0.861556	C2cd5
7597.92	0.139422	0.0630395	2.21166	0.0269902	0.871596	Kidins220
1862.82	0.151616	0.0685698	2.21112	0.0270275	0.871596	Srpk2
2737.78	0.159023	0.071975	2.20943	0.0271449	0.872012	Rps6ka3
379.59	0.333094	0.150821	2.20855	0.0272063	0.872012	C78859
938.025	-0.278438	0.126238	-2.20566	0.0274078	0.875801	Rps2
1064.95	0.18102	0.0821162	2.20443	0.027494	0.875894	Spire1
6946.1	-0.141105	0.0641875	-2.19832	0.0279261	0.88697	Kcnab2
579.406	0.242462	0.110456	2.19509	0.0281569	0.889926	Prr12
2174.62	0.160944	0.0733626	2.19381	0.028249	0.889926	Xpo1
1916.58	0.149999	0.0684064	2.19277	0.0283242	0.889926	Abi2
1774.62	-0.173086	0.0790013	-2.19093	0.0284569	0.889926	Cnp
1431.63	0.170014	0.0776255	2.19018	0.0285114	0.889926	Arid1b
2207.47	-0.158269	0.072272	-2.18991	0.0285306	0.889926	Gnai1
732.542	0.221874	0.101395	2.18821	0.0286546	0.889926	Acap2
417.932	-0.280975	0.128529	-2.18609	0.028809	0.889926	Plcd4
133.732	-0.475498	0.217745	-2.18374	0.0289812	0.889926	Ppm1j
978.828	0.200022	0.0917256	2.18066	0.0292089	0.889926	Atf7
7606.76	0.127877	0.0586835	2.17909	0.0293246	0.889926	Klf7
716.059	-0.21072	0.0967629	-2.1777	0.0294286	0.889926	Elp5
104.971	-0.523348	0.240367	-2.17729	0.0294592	0.889926	Neto1
138.88	-0.443743	0.203851	-2.1768	0.0294956	0.889926	Pcdhb17
206.524	-0.451921	0.207649	-2.17637	0.0295274	0.889926	Crim1
149.468	-0.452178	0.207774	-2.1763	0.0295327	0.889926	Tmem159
176.889	0.39677	0.182416	2.17509	0.0296234	0.889926	Ncapg2
980.323	-0.201342	0.0926964	-2.17206	0.0298514	0.889926	Tmem47
1400.87	0.212969	0.098058	2.17187	0.0298657	0.889926	Ago3
463.496	0.251607	0.115862	2.1716	0.0298857	0.889926	Elfn2
2055.86	0.185672	0.0856125	2.16874	0.0301022	0.889926	Rgs9
557.813	0.237978	0.109756	2.16825	0.0301397	0.889926	Mical2
2103.82	-0.144266	0.0665763	-2.16693	0.0302404	0.889926	Otub1
163.024	-0.409322	0.189009	-2.16562	0.0303399	0.889926	Tnfrsf1a
1192.36	0.21259	0.0982543	2.16367	0.0304898	0.889926	Celsr3
7965.66	0.110912	0.0512686	2.16335	0.030514	0.889926	Prrc2b
777.682	0.216581	0.100158	2.1624	0.0305872	0.889926	Six4
863.029	0.197122	0.0911999	2.16142	0.0306627	0.889926	Ero1l
794.207	0.231469	0.107138	2.16047	0.0307362	0.889926	Ddr2
1287.47	-0.274809	0.127237	-2.15981	0.0307871	0.889926	Ank1
543.244	-0.277919	0.128679	-2.15978	0.0307893	0.889926	Cryzl1
1085.61	-0.186403	0.0863119	-2.15965	0.0308	0.889926	Pfkl
1716.94	0.157301	0.07285	2.15924	0.0308314	0.889926	Nol4l
752.068	0.210088	0.0973355	2.15839	0.0308973	0.889926	Rims2
163.018	-0.399425	0.185221	-2.15647	0.0310466	0.890478	Coa7
569.122	0.235481	0.109222	2.15597	0.0310858	0.890478	Zfp612
159.188	0.400224	0.18575	2.15464	0.0311899	0.89103	Zfp382
1239.23	0.167413	0.0777541	2.15311	0.0313104	0.892049	Mapk8
3404.24	0.163236	0.0758769	2.15132	0.0314507	0.893624	Ppfia2
361.625	-0.297934	0.138631	-2.14912	0.0316249	0.8944	Rps3a1
2073.81	-0.167726	0.0781556	-2.14606	0.0318684	0.8944	Glrb
545.653	-0.286707	0.133612	-2.14583	0.0318869	0.8944	Hcn1
117.655	-0.480433	0.22396	-2.14518	0.0319387	0.8944	Slc10a4
261.184	-0.338796	0.158043	-2.1437	0.0320568	0.8944	Mef2c
4285.06	-0.140236	0.0655064	-2.1408	0.0322904	0.8944	Prkar2b
12823.5	0.118657	0.0554271	2.14077	0.0322928	0.8944	Atp8a1
319.186	0.298079	0.139299	2.13984	0.0323677	0.8944	D430041D05Rik
3607.52	0.139145	0.0650731	2.13829	0.0324935	0.8944	Map7
1785.96	-0.170184	0.0796968	-2.13539	0.0327289	0.8944	Chga
9332.34	0.111439	0.0522066	2.13458	0.0327953	0.8944	Agtpbp1
557.167	-0.227391	0.106561	-2.1339	0.0328509	0.8944	Rplp2
378.591	-0.277575	0.130154	-2.13266	0.0329525	0.8944	Rapgef5
702.958	0.23259	0.109198	2.12997	0.0331739	0.8944	Dlc1
1271.42	0.195388	0.091748	2.12962	0.0332031	0.8944	Mvb12b
385.432	-0.270364	0.127006	-2.12875	0.0332747	0.8944	Spr
601.088	0.226108	0.106232	2.12844	0.0333007	0.8944	Kdm5b
1812.19	0.18344	0.0862384	2.12713	0.0334096	0.8944	Stum
4096.68	0.128929	0.060628	2.12656	0.0334568	0.8944	Cacna1b
347.893	0.289086	0.136224	2.12214	0.0338259	0.8944	Inppl1
1688.06	0.158019	0.0744753	2.12176	0.0338578	0.8944	Med14
416.896	0.295775	0.139477	2.12059	0.0339562	0.8944	Gucy1a2
1719.72	0.151654	0.0715859	2.11849	0.0341338	0.8944	Kdm2a
9215.28	-0.137177	0.0647542	-2.11842	0.0341391	0.8944	Avil
362.674	-0.268891	0.127028	-2.11679	0.0342774	0.8944	Ifi35
5121.18	-0.128559	0.0607413	-2.1165	0.0343022	0.8944	Usp5
8244.9	-0.114986	0.0543489	-2.1157	0.0343706	0.8944	Pygb
6661.33	-0.122235	0.0577973	-2.11489	0.0344395	0.8944	Cbfb
883.181	0.212457	0.100462	2.1148	0.0344474	0.8944	Trim56
222.21	-0.349618	0.165323	-2.11476	0.0344505	0.8944	Rims1
1507.82	0.229967	0.108833	2.11303	0.0345986	0.8944	Nktr
465.426	0.260877	0.123509	2.11222	0.0346676	0.8944	Ankrd45
1191.69	0.186076	0.0880963	2.11218	0.0346707	0.8944	Luc7l3
32319.2	0.159662	0.0756087	2.11169	0.0347134	0.8944	Gm42418
625.541	0.221933	0.10513	2.11104	0.0347687	0.8944	Asah2
737.535	-0.221564	0.104959	-2.11095	0.0347766	0.8944	Mmd2
2475.89	0.15608	0.0740046	2.10906	0.0349393	0.8944	Fxr1
209.466	0.348684	0.165374	2.10846	0.0349912	0.8944	Wdcp
621.069	0.231279	0.109714	2.10801	0.0350298	0.8944	Tbck
587.312	-0.216964	0.102946	-2.10756	0.0350689	0.8944	Arhgap15
1019.68	0.20456	0.0971033	2.10663	0.03515	0.8944	Foxj3
436.526	-0.249338	0.118386	-2.10615	0.0351912	0.8944	Psat1
161.126	0.402028	0.19098	2.10508	0.0352842	0.8944	Plekha7
2479.55	0.172881	0.0821273	2.10504	0.0352876	0.8944	Fzd3
604.047	-0.223209	0.106046	-2.10483	0.0353064	0.8944	Eef1e1
697.288	-0.237952	0.113118	-2.10356	0.0354167	0.895038	Sem1
470.126	0.245559	0.116914	2.10033	0.0356999	0.896303	Dvl3
3257.09	0.158216	0.0753293	2.10032	0.0357006	0.896303	Phactr2
743.685	0.205905	0.0980989	2.09895	0.0358215	0.896303	Tbc1d8
414.032	-0.256419	0.122229	-2.09785	0.0359185	0.896303	Pex14
5799.66	-0.122066	0.0582226	-2.09654	0.036034	0.896303	S100a10
1892.55	0.147961	0.0706356	2.09471	0.0361968	0.896303	Arid1a
1162.95	-0.185199	0.0884172	-2.09461	0.0362059	0.896303	Ssrp1
659.203	-0.215482	0.102888	-2.09434	0.0362298	0.896303	Gcsh
1174.77	0.175369	0.0837731	2.09338	0.0363152	0.896303	Xpr1
1694.48	-0.160364	0.076625	-2.09284	0.0363633	0.896303	Ap2m1
1447.91	0.180914	0.0864635	2.09238	0.0364046	0.896303	Zfp318
298.295	-0.310453	0.148661	-2.08833	0.0367681	0.900115	Sox10
1144.25	-0.17527	0.083997	-2.08662	0.0369224	0.900115	Stub1
491.921	-0.24646	0.11812	-2.08652	0.0369315	0.900115	Sncb
277.764	-0.342099	0.164061	-2.0852	0.0370514	0.900115	Osgep
38942.5	0.117523	0.0563631	2.08511	0.0370589	0.900115	mt-Nd2
101.17	0.512809	0.246065	2.08404	0.0371568	0.900115	Etfbkmt
595.15	0.244699	0.117424	2.08389	0.0371703	0.900115	Phka2
986.937	0.182744	0.087728	2.08308	0.0372444	0.900115	Prkci
175.757	0.366065	0.176026	2.0796	0.0375619	0.905706	Edrf1
521.617	0.231296	0.111462	2.07511	0.0379763	0.913603	Unc79
30086.1	0.14247	0.0687681	2.07174	0.0382899	0.919046	Dst
1709.32	0.146403	0.0707559	2.06913	0.038534	0.920026	Atxn2
3196.33	-0.127399	0.0615729	-2.06907	0.0385397	0.920026	Cdk16
267.28	0.325178	0.157205	2.0685	0.0385933	0.920026	Pde4a
871.287	-0.194549	0.0941975	-2.06533	0.038892	0.922664	Prelid3b
275.609	-0.302583	0.146507	-2.06531	0.0388936	0.922664	Zfp637
3011.03	0.146091	0.0707707	2.06429	0.0389903	0.922664	Gna13
1448.32	-0.157286	0.0762189	-2.06361	0.039055	0.922664	Fam32a
1261.38	0.164903	0.0800823	2.05917	0.0394782	0.930569	Fbxl20
358.386	-0.260649	0.12675	-2.0564	0.0397437	0.931946	Mrpl54
362.975	0.276201	0.13445	2.0543	0.0399469	0.931946	Ptpre
568.215	-0.222486	0.108385	-2.05273	0.0400985	0.931946	Abtb2
760.564	-0.195166	0.0950787	-2.05268	0.040104	0.931946	Hibadh
171.774	-0.374354	0.182386	-2.05254	0.0401171	0.931946	Dtymk
1540.01	-0.152409	0.0742633	-2.05228	0.0401423	0.931946	Dbnl
264.133	0.30795	0.150103	2.05159	0.0402098	0.931946	Ccdc117
1450.9	-0.189128	0.0922362	-2.05048	0.0403178	0.931946	S100a6
197.169	0.408613	0.199353	2.04969	0.0403944	0.931946	Prkn
16018.5	-0.126757	0.0618616	-2.04904	0.0404586	0.931946	Anxa2
1109.89	0.197652	0.0964866	2.04849	0.0405117	0.931946	Foxo3
11963.6	0.105713	0.0516904	2.04512	0.0408427	0.936284	Atp2b4
131.984	0.452796	0.221442	2.04476	0.0408784	0.936284	Nr4a3
165.497	0.408183	0.200038	2.04053	0.0412973	0.943824	Mkks
166.953	-0.392145	0.192483	-2.03729	0.0416206	0.947853	Rfxank
363.305	-0.270015	0.132603	-2.03626	0.041724	0.947853	Naa20
9980.97	0.129722	0.0638018	2.0332	0.0420323	0.947853	Enah
3206.68	0.133304	0.0655674	2.03308	0.042044	0.947853	Kcnb1
298.581	-0.291762	0.14352	-2.03291	0.0420617	0.947853	Hey2
132.489	0.426363	0.209875	2.03151	0.0422037	0.947853	Cckbr
163.962	0.429603	0.211512	2.0311	0.0422445	0.947853	Zfp182
446.843	0.26558	0.130782	2.03071	0.0422846	0.947853	Cep290
408.269	0.279318	0.137547	2.0307	0.0422851	0.947853	Nup62
2140.89	-0.143653	0.0707938	-2.02917	0.0424411	0.949326	Zfand3
443.79	-0.355962	0.175707	-2.02589	0.0427765	0.951449	Col1a2
325.536	-0.28766	0.142093	-2.02445	0.0429242	0.951449	Tor1a
102.807	-0.521578	0.257686	-2.02409	0.0429612	0.951449	Ccnd1
5184.21	-0.110222	0.0544682	-2.02361	0.0430102	0.951449	Snrpn
2001.57	0.157799	0.0780596	2.02151	0.0432265	0.951449	Sbno1
4012.44	0.11488	0.0568303	2.02145	0.0432329	0.951449	Adgrl1
2563.72	0.142162	0.0703466	2.02088	0.0432927	0.951449	Lrrc58
3835.91	0.140607	0.0695887	2.02055	0.0433267	0.951449	Hspa4l
117.535	0.45581	0.225709	2.01946	0.0434394	0.951449	Zfp748
97.1654	0.535888	0.265364	2.01944	0.043441	0.951449	Ripk1
2368.6	0.181828	0.0901515	2.01691	0.0437045	0.953545	Golgb1
2546.3	-0.133702	0.0662946	-2.01678	0.0437181	0.953545	Scamp5
341.775	0.272699	0.135298	2.01555	0.0438472	0.954381	Ahdc1
2465.89	0.126435	0.0627901	2.01361	0.0440503	0.95505	F2rl2
1575.66	-0.148617	0.0738444	-2.01257	0.0441595	0.95505	Elp2
247.698	-0.309402	0.153856	-2.01099	0.0443269	0.95505	Lmo4
447.608	0.280349	0.139424	2.01076	0.0443511	0.95505	Vmn1r85
226.838	0.317496	0.158005	2.00941	0.0444938	0.95505	Ift81
3853.39	0.116776	0.0581441	2.00839	0.0446017	0.95505	45543
96.3347	0.485479	0.241839	2.00745	0.0447022	0.95505	Gm14412
1571.62	-0.145757	0.0726137	-2.0073	0.044718	0.95505	Oaz2
1427.04	0.202942	0.101137	2.00661	0.0447909	0.95505	Armcx4
1432.43	-0.214346	0.106864	-2.00578	0.0448796	0.95505	H2-K1
1737.83	0.139483	0.0695607	2.0052	0.0449415	0.95505	Numa1
309.476	0.30001	0.149635	2.00495	0.0449681	0.95505	Zfp398
2420.07	-0.139464	0.0696893	-2.00123	0.045368	0.961601	Aars
1988.16	0.158325	0.0792085	1.99884	0.0456253	0.963473	Vps13b
1430.18	0.197944	0.0990356	1.99871	0.0456397	0.963473	Cnksr2
108.443	0.488375	0.244746	1.99544	0.0459951	0.96903	Oxtr
559.182	0.211263	0.105934	1.99428	0.0461211	0.969742	Lsm12
4890.95	-0.107548	0.0539803	-1.99236	0.0463311	0.971866	Arl6ip1
251.083	-0.306014	0.153838	-1.9892	0.0466791	0.971866	Dnajb6
271.289	0.442361	0.222458	1.98852	0.0467544	0.971866	Myo7a
302.75	-0.271439	0.13651	-1.98842	0.046765	0.971866	Sephs2
1301.05	-0.158785	0.0799389	-1.98633	0.0469965	0.971866	Tusc2
553.777	-0.211675	0.106566	-1.98632	0.0469977	0.971866	Dnajc12
3711.82	0.113949	0.0574263	1.98427	0.0472254	0.971866	Mapk10
1469.16	0.15	0.0756015	1.98408	0.0472467	0.971866	Casc4
508.861	0.227843	0.114857	1.98371	0.0472886	0.971866	Nav3
216.516	-0.326836	0.164872	-1.98236	0.0474385	0.971866	Twf2
4078.08	-0.114551	0.0578387	-1.98053	0.0476445	0.971866	Ube2d3
734.614	-0.248382	0.125475	-1.97953	0.0477566	0.971866	Ndufb1-ps
106.383	-0.458389	0.231595	-1.97927	0.0477855	0.971866	Rbmxl1
600.434	0.217217	0.109861	1.9772	0.0480193	0.971866	Zfp292
13602.2	0.104369	0.0528157	1.9761	0.0481435	0.971866	Kif5c
5019.37	-0.322649	0.163345	-1.97526	0.0482386	0.971866	Jun
1564.83	0.149676	0.0757756	1.97525	0.0482398	0.971866	Atf2
274.512	-0.289963	0.146929	-1.97349	0.04844	0.971866	Fam241b
90.2201	-0.515273	0.261138	-1.97318	0.0484753	0.971866	Shank2
2986.41	0.180451	0.0914557	1.9731	0.0484842	0.971866	Ranbp2
410.071	0.281602	0.14276	1.97256	0.0485457	0.971866	Arhgap33
2539.67	0.13737	0.069648	1.97235	0.0485696	0.971866	Mkln1
265.552	-0.408135	0.206975	-1.97191	0.0486198	0.971866	Mrgprd
783.583	0.187055	0.094905	1.97097	0.0487273	0.971866	Arid4b
3374.95	0.135698	0.0688555	1.97077	0.0487504	0.971866	Ankrd17
1897.11	-0.136203	0.0691233	-1.97043	0.048789	0.971866	Zswim8
179.543	-0.387933	0.196919	-1.97001	0.0488368	0.971866	Kcnh1
2269.46	0.174402	0.0885526	1.96947	0.0488991	0.971866	Cacna1e
1349.55	-0.183193	0.0930376	-1.96902	0.0489509	0.971866	Rbfox3
225.492	-0.498466	0.253475	-1.96653	0.0492372	0.971866	Gpr65
284.632	-0.334599	0.170271	-1.9651	0.0494032	0.971866	Rassf4
540.648	-0.234991	0.119601	-1.96479	0.049439	0.971866	Sf3b6
881.219	-0.17671	0.089984	-1.9638	0.0495536	0.971866	Phtf1
315.598	-0.292174	0.148785	-1.96373	0.0495609	0.971866	Mrps34
108.084	-0.495951	0.252562	-1.96368	0.0495676	0.971866	Fkbpl
1446.52	0.1822	0.0927957	1.96345	0.0495934	0.971866	D430019H16Rik
267.439	0.3118	0.158905	1.96218	0.0497419	0.971866	Elf1
167.686	0.451497	0.230173	1.96155	0.0498144	0.971866	Myh11
386.664	0.259455	0.132337	1.96056	0.0499302	0.971866	Clmn
304.403	0.294654	0.150313	1.96027	0.049964	0.971866	Kat14
159.998	0.407098	0.207775	1.95932	0.0500752	0.971866	Arhgef37
518.267	-0.222482	0.113588	-1.95867	0.0501509	0.971866	Ndufb9
456.161	-0.23482	0.119915	-1.95822	0.0502037	0.971866	Coasy
254.334	-0.29483	0.150616	-1.95749	0.0502897	0.971866	Wdr74
1235.32	-0.161956	0.0827708	-1.95668	0.050385	0.971922	Hnrnpa0
138.281	0.407136	0.208412	1.95352	0.0507586	0.977335	Trib1
93.0348	0.486637	0.249279	1.95218	0.0509173	0.978598	Hook2
104.25	-0.451964	0.231746	-1.95025	0.0511459	0.981198	Itgb4
1411.35	0.199434	0.102358	1.9484	0.051367	0.983095	Tnrc6a
93.4448	0.548371	0.281534	1.9478	0.0514391	0.983095	Bcl11a
3277.2	-0.117185	0.060187	-1.94702	0.0515326	0.983095	Cfl2
975.353	-0.178849	0.0919016	-1.94609	0.0516442	0.983095	Pebp1
1079.84	0.164971	0.0847955	1.94552	0.0517123	0.983095	Jmy
1651.59	-0.157815	0.0812166	-1.94313	0.0520003	0.986061	Ndufb8
459.231	-0.228662	0.117766	-1.94167	0.0521773	0.986061	Id2
896.849	0.20474	0.105504	1.94059	0.0523084	0.986061	Nhlh2
351.254	0.25708	0.132551	1.93948	0.0524428	0.986061	Xpo4
1786.86	0.191249	0.0986794	1.93808	0.0526133	0.986061	Ankrd12
1052.24	-0.163824	0.084537	-1.93789	0.0526364	0.986061	Eef1g
903.117	0.180673	0.0933129	1.93621	0.052842	0.986061	Bhlhe41
1286.15	0.189139	0.0976969	1.93598	0.0528703	0.986061	Chd9
675.918	0.199133	0.102862	1.93591	0.0528782	0.986061	Eml4
3766.31	0.112858	0.0583301	1.93481	0.0530134	0.986061	Stt3b
574.144	0.208038	0.10762	1.93307	0.0532273	0.986061	Zfp608
96.9046	-0.45572	0.235931	-1.93158	0.0534113	0.986061	Aldh1b1
269.947	-0.280346	0.145197	-1.93081	0.053507	0.986061	Serpinb9
558.573	0.224215	0.116168	1.93009	0.0535958	0.986061	Zfp738
211.787	-0.320863	0.166245	-1.93006	0.0535993	0.986061	Sulf2
2000.31	-0.142472	0.0738274	-1.9298	0.0536322	0.986061	Sdhb
778.78	0.177017	0.0917367	1.92962	0.0536545	0.986061	Rnasel
1112.29	0.179738	0.0932142	1.92822	0.0538272	0.986061	Capn7
1795.44	0.145767	0.0756186	1.92766	0.0538973	0.986061	Rnf19a
367.413	-0.259607	0.134743	-1.92669	0.0540188	0.986061	H2-T22
898.256	-0.174625	0.0906702	-1.92594	0.0541118	0.986061	Il10rb
1042.47	-0.207672	0.10788	-1.92503	0.0542259	0.986061	Gfra2
96.5888	0.480985	0.249903	1.92468	0.0542689	0.986061	Ccdc148
380.16	-0.244539	0.127078	-1.92432	0.0543148	0.986061	Med22
420.887	-0.266866	0.138768	-1.9231	0.0544674	0.986061	Kcnip3
852.225	0.218578	0.11373	1.92191	0.0546173	0.986061	Zzz3
722.936	-0.211588	0.110108	-1.92163	0.0546521	0.986061	Tagln2
299.784	-0.301608	0.157066	-1.92026	0.0548252	0.986061	Man1a
3004.39	0.122733	0.0639188	1.92015	0.0548392	0.986061	Hnrnpul2
2026.96	-0.13872	0.0722628	-1.91966	0.0549014	0.986061	Ndufv1
2431.72	0.126585	0.0660189	1.91741	0.0551862	0.986061	Ncor2
787.127	0.220856	0.115206	1.91705	0.0552312	0.986061	9930021J03Rik
1794.26	-0.143611	0.0749166	-1.91694	0.0552451	0.986061	Ran
507.695	-0.241426	0.125979	-1.91639	0.0553151	0.986061	Naxe
5305.79	-0.119503	0.0623608	-1.91632	0.0553241	0.986061	Syt1
125.309	-0.434006	0.226667	-1.91473	0.0555272	0.986061	Mfsd2a
1211.18	-0.159275	0.0831958	-1.91446	0.055561	0.986061	Mgll
4198.12	0.108602	0.0567278	1.91443	0.055565	0.986061	Ddx6
1257.49	-0.156367	0.0817461	-1.91284	0.0557681	0.986061	M6pr
101.208	-0.525395	0.274802	-1.91191	0.0558884	0.986061	Cav1
369.252	0.247704	0.129573	1.9117	0.0559151	0.986061	Art3
857.209	0.213462	0.111701	1.91101	0.0560029	0.986061	Nhs
517.298	0.231299	0.121068	1.91049	0.0560698	0.986061	Firre
1111.06	-0.166789	0.0873284	-1.9099	0.056146	0.986061	Cd81
3540.21	-0.13701	0.0717827	-1.90868	0.056303	0.986061	Mbnl1
164.539	0.358138	0.187746	1.90756	0.0564475	0.986061	Adprhl1
762.912	0.177166	0.092884	1.90739	0.0564706	0.986061	Map3k9
4937.09	0.124594	0.0653524	1.9065	0.0565854	0.986061	Lrrc8b
215.961	-0.317658	0.166622	-1.90646	0.0565909	0.986061	Blvrb
1574.02	0.172401	0.0904452	1.90614	0.0566321	0.986061	Tulp4
5375.64	-0.123705	0.0649211	-1.90546	0.0567199	0.986061	Tpi1
3423.8	0.132152	0.0693671	1.90511	0.0567653	0.986061	Nf1
397.37	0.265061	0.139173	1.90454	0.0568395	0.986061	Chd1
236.458	0.316649	0.166358	1.90341	0.0569865	0.986371	Carns1
3085.84	0.156703	0.0823738	1.90234	0.057127	0.986371	Ralgps2
1038.48	0.206844	0.108736	1.90225	0.0571388	0.986371	Nr4a1
884.794	-0.179434	0.0944085	-1.90061	0.0573533	0.986601	Ndufc2
313.156	-0.28459	0.149784	-1.90001	0.0574323	0.986601	Arl16
2345.71	0.161285	0.0848872	1.9	0.0574336	0.986601	Ccdc80
281.403	0.274214	0.144429	1.89861	0.0576159	0.988117	Shtn1
528.441	0.210109	0.11087	1.89509	0.0580809	0.991279	Homer1
2296.62	0.198219	0.1047	1.89322	0.058329	0.991279	Pcm1
96.2821	0.487239	0.257362	1.8932	0.0583308	0.991279	Ogn
116.39	-0.466331	0.24634	-1.89304	0.0583532	0.991279	Trpc3
504.837	0.237501	0.125466	1.89295	0.0583648	0.991279	Zfp788
3118.11	0.129002	0.0681708	1.89234	0.0584457	0.991279	Pdpk1
1239.18	0.172436	0.0911367	1.89206	0.0584828	0.991279	Ehbp1
646.913	0.206531	0.109213	1.89109	0.0586126	0.991279	Epb41l4b
823.029	0.181206	0.0958349	1.89082	0.0586489	0.991279	Garem1
165.439	-0.450055	0.238229	-1.88917	0.0588688	0.993399	Klf4
647.692	0.206041	0.109176	1.88723	0.0591294	0.993464	Scai
342.237	0.247643	0.131274	1.88646	0.0592335	0.993464	2410131K14Rik
333.575	-0.272156	0.144362	-1.88523	0.0593982	0.993464	Vwa1
566.99	-0.241429	0.128201	-1.88321	0.0596719	0.993464	Ifit1
1161.95	-0.17407	0.0924422	-1.88302	0.059698	0.993464	Tbcb
1834.56	0.145175	0.0771134	1.88262	0.059752	0.993464	Stard13
2084.09	0.130812	0.0695398	1.88111	0.0599573	0.993464	Car10
360.352	-0.240457	0.12787	-1.88048	0.0600425	0.993464	Sptlc1
4719.71	0.118659	0.0631134	1.88009	0.0600958	0.993464	Ubr5
5415.6	-0.120382	0.0640363	-1.8799	0.0601212	0.993464	Fdft1
882.786	0.164416	0.0874671	1.87975	0.0601421	0.993464	Prickle2
125230	0.106643	0.0567784	1.87824	0.0603488	0.993464	Map1b
95.0184	-0.633667	0.337469	-1.87771	0.0604212	0.993464	Gm13425
493.451	0.223177	0.118942	1.87636	0.060606	0.993464	Dek
1166.36	0.164891	0.0878812	1.87629	0.0606157	0.993464	Helz
676.905	-0.18491	0.0985929	-1.87549	0.0607251	0.993464	Phf23
400.389	0.249092	0.132825	1.87534	0.0607465	0.993464	Ftl1
327.703	-0.262581	0.140053	-1.87487	0.0608107	0.993464	Rpl34
636.607	-0.237052	0.126452	-1.87463	0.0608431	0.993464	Fmnl1
654.259	0.189745	0.10125	1.87403	0.0609268	0.993464	Celf2
315.589	0.264247	0.141006	1.87401	0.0609289	0.993464	Polk
132.743	-0.380769	0.203202	-1.87385	0.0609516	0.993464	Tradd
2639.73	0.118366	0.063267	1.87089	0.0613604	0.9956	Neo1
1591.74	0.153678	0.0821516	1.87066	0.0613919	0.9956	Ggnbp2
1957.19	0.194652	0.104062	1.87055	0.061408	0.9956	Vps13a
579.487	-0.207739	0.111091	-1.87	0.0614844	0.9956	Cdc16
693.731	-0.180521	0.0965623	-1.86948	0.0615562	0.9956	Dr1
1138.15	-0.161976	0.086712	-1.86798	0.0617649	0.996063	2610002M06Rik
1671.74	0.162515	0.0870484	1.86695	0.0619087	0.996063	Sema6d
1670.92	-0.139607	0.0748154	-1.86602	0.0620386	0.996063	Pdzd4
1159.1	-0.164479	0.0881688	-1.86551	0.0621105	0.996063	Faf2
1672.78	0.155466	0.0833817	1.86451	0.0622496	0.996063	Ctnnd2
524.269	0.211985	0.113699	1.86445	0.062259	0.996063	Asxl2
449.483	-0.214961	0.115457	-1.86182	0.0626284	0.996063	Washc1
1307.24	-0.147283	0.0791251	-1.86139	0.0626884	0.996063	Atp6v0c
5405.19	0.147128	0.0790595	1.86097	0.0627481	0.996063	Macf1
1312.7	0.16991	0.0913191	1.86062	0.062798	0.996063	Atp7a
435.759	-0.226256	0.121675	-1.85951	0.0629547	0.996063	Ell2
307.665	-0.263641	0.141798	-1.85927	0.0629884	0.996063	Asb6
429.949	-0.227472	0.122441	-1.85781	0.0631964	0.996063	Mrpl28
2860.45	-0.128191	0.0690175	-1.85737	0.063259	0.996063	Atp5c1
334.188	0.253506	0.136626	1.85548	0.0635281	0.996063	C1ql2
1246.61	-0.158871	0.0856479	-1.85493	0.0636058	0.996063	Bnip3l
1883.12	0.128277	0.0691753	1.85437	0.0636859	0.996063	Lrrc8c
212.426	-0.320336	0.172814	-1.85364	0.06379	0.996063	Qtrt2
1734.98	-0.138256	0.0746418	-1.85226	0.0639891	0.996063	Sh3glb2
205.19	0.344048	0.185746	1.85225	0.0639904	0.996063	Sntb1
88.7022	0.461495	0.249394	1.85047	0.0642458	0.996063	Gm16485
235.363	-0.288445	0.156041	-1.84852	0.0645273	0.996063	Rps27l
167.052	0.339056	0.183521	1.84751	0.0646733	0.996063	Fyco1
823.334	0.20828	0.112821	1.84612	0.0648755	0.996063	Smarca1
223.094	-0.326864	0.177171	-1.84491	0.0650501	0.996063	Faah
934.243	-0.185286	0.100459	-1.84439	0.065127	0.996063	Rps14
1879.74	-0.145787	0.0790854	-1.84341	0.0652696	0.996063	Nudt3
1911.7	0.157436	0.0855434	1.84042	0.065706	0.996063	Abcb1a
3823.05	-0.138168	0.0751437	-1.83871	0.0659576	0.996063	Ahnak2
3152.94	-0.154079	0.0838022	-1.8386	0.065974	0.996063	Spock3
91.0713	0.461086	0.25096	1.83729	0.0661674	0.996063	Usp2
3188.13	-0.111578	0.0607361	-1.83709	0.0661959	0.996063	Vdac2
3311.25	-0.121434	0.0661033	-1.83704	0.0662041	0.996063	Atl1
162.981	-0.35981	0.1959	-1.8367	0.0662541	0.996063	Rrp1b
2958.84	0.124403	0.0677631	1.83585	0.0663797	0.996063	Tro
1381.04	0.203968	0.111122	1.83553	0.0664277	0.996063	Eya1
1296.59	0.139851	0.0761994	1.83533	0.0664575	0.996063	Slc12a6
88.8207	0.478243	0.260681	1.83459	0.0665664	0.996063	Cep192
321.646	0.250028	0.13634	1.83386	0.0666751	0.996063	Slc15a4
239.745	0.29669	0.16186	1.833	0.0668024	0.996063	Dyrk1b
2129.24	0.142974	0.0780006	1.83299	0.0668044	0.996063	Hipk3
921.106	0.17225	0.0940174	1.83211	0.0669349	0.996063	Midn
10304.5	0.101398	0.0553454	1.83209	0.066938	0.996063	Ttc3
282.152	-0.287986	0.157205	-1.83191	0.0669653	0.996063	Yod1
1170.73	-0.201148	0.10983	-1.83145	0.0670337	0.996063	Dusp1
414.505	-0.234343	0.127993	-1.8309	0.0671153	0.996063	Uros
1326.6	-0.155761	0.0850869	-1.83061	0.0671586	0.996063	Tmem59l
3999.6	-0.105311	0.057534	-1.8304	0.0671895	0.996063	Atp6v1e1
296.619	-0.269105	0.147021	-1.83038	0.0671925	0.996063	Sp4
169.171	0.389189	0.212823	1.8287	0.0674448	0.996063	Nup160
99.5056	-0.455022	0.24884	-1.82857	0.0674642	0.996063	Paqr6
2484.93	-0.117122	0.0640708	-1.82801	0.0675483	0.996063	Me1
1011.49	-0.164697	0.0901103	-1.82772	0.0675911	0.996063	Tmem56
1270.08	-0.152031	0.0831993	-1.82731	0.0676534	0.996063	Serpinf1
7144.27	0.101047	0.0553263	1.82639	0.0677918	0.996063	Dgkh
819.262	-0.169828	0.093012	-1.82587	0.0678694	0.996063	Tmx1
718.979	0.176054	0.0964398	1.82554	0.0679202	0.996063	Lats1
396.315	0.224706	0.12311	1.82525	0.0679629	0.996063	Kctd7
1279.81	0.157736	0.0864463	1.82467	0.0680502	0.996063	Tug1
88.3629	0.500699	0.274426	1.82453	0.0680715	0.996063	Gm11696
170.652	0.342021	0.187472	1.82438	0.0680941	0.996063	Zfp667
162.584	-0.358891	0.196814	-1.8235	0.0682271	0.996063	Slc35b2
395.668	-0.241836	0.132664	-1.82292	0.068315	0.996063	Fubp3
3035.72	-0.106742	0.0585582	-1.82283	0.0683288	0.996063	Stx7
2323.03	0.136359	0.0748111	1.82271	0.0683474	0.996063	Itsn2
1453.21	-0.132045	0.0724495	-1.82258	0.0683666	0.996063	Fbxw8
1064.12	0.177518	0.0974758	1.82115	0.0685845	0.996063	Cd2ap
230.938	0.294025	0.161452	1.82112	0.0685881	0.996063	Cpne7
118.57	0.395275	0.217084	1.82084	0.0686315	0.996063	Zfp955a
122.677	-0.400996	0.220237	-1.82074	0.068646	0.996063	Coa6
785.586	-0.178639	0.0981179	-1.82066	0.0686584	0.996063	Abhd10
3890.65	0.125753	0.0690703	1.82065	0.0686603	0.996063	Frmd4a
3223.06	0.114872	0.0630941	1.82064	0.0686612	0.996063	Dhx9
598.059	-0.189172	0.103968	-1.81952	0.0688324	0.996063	Atg5
987.433	-0.178985	0.0984359	-1.81829	0.0690206	0.996063	Hnrnpdl
319.172	-0.249704	0.137447	-1.81673	0.0692581	0.996063	Ap4s1
1100.87	0.174112	0.0958527	1.81645	0.0693007	0.996063	Igip
1171.04	0.154438	0.0850896	1.815	0.0695241	0.996063	Smg5
2408.22	-0.133024	0.0733108	-1.81452	0.0695972	0.996063	Nat8l
1220.02	-0.14341	0.0790469	-1.81424	0.0696411	0.996063	Smpd1
196.193	0.328549	0.181239	1.81279	0.0698644	0.996063	Klhl23
1892.15	0.139601	0.0770855	1.81099	0.0701417	0.996063	Cacna1h
9518.05	-0.106778	0.0589742	-1.81059	0.0702039	0.996063	Anxa5
3595.93	-0.12626	0.0697394	-1.81046	0.070225	0.996063	Tagln3
730.435	0.174111	0.0961717	1.81041	0.0702318	0.996063	Crebbp
1222.06	-0.144063	0.079585	-1.81018	0.0702686	0.996063	Raly
909.142	-0.17075	0.0943609	-1.80954	0.0703672	0.996063	Med28
7077.36	-0.113451	0.0627036	-1.80932	0.0704007	0.996063	Edil3
960.213	-0.471622	0.260701	-1.80905	0.0704435	0.996063	Rph3a
1018.78	0.15754	0.0870928	1.80888	0.0704703	0.996063	Rrm2b
235.595	-0.284894	0.1575	-1.80886	0.0704733	0.996063	Myg1
143.697	0.391866	0.216732	1.80807	0.070596	0.996063	Gm48342
905.807	-0.161905	0.0895503	-1.80797	0.0706105	0.996063	Tmem242
259.054	-0.269747	0.149203	-1.80792	0.0706196	0.996063	Ttll11
1362.51	0.150348	0.0831621	1.80789	0.070624	0.996063	Eif5b
1042.29	-0.158765	0.0878541	-1.80714	0.07074	0.996063	Suds3
891.845	-0.204507	0.113284	-1.80526	0.0710339	0.996063	Cdh1
646.211	-0.195859	0.108591	-1.80364	0.0712877	0.996063	Cacna2d3
440.294	0.215997	0.119847	1.80228	0.0715019	0.996063	Map3k1
92.7467	0.49426	0.274433	1.80102	0.0716999	0.996063	Kcng3
296.284	0.266089	0.147913	1.79895	0.072027	0.996063	Nfya
856.878	0.182552	0.1015	1.79853	0.0720923	0.996063	Agrn
586.915	0.203931	0.113408	1.7982	0.0721448	0.996063	Cnot4
4186.51	0.112919	0.0628172	1.79759	0.0722426	0.996063	Vps13d
7454.78	-0.109878	0.0611467	-1.79696	0.0723427	0.996063	Anxa6
3790.86	-0.100688	0.0560414	-1.79668	0.0723864	0.996063	Prkacb
541.146	-0.526884	0.293308	-1.79635	0.0724383	0.996063	Pappa2
499.429	-0.200715	0.111785	-1.79554	0.072567	0.996063	Pelp1
1498.68	0.148109	0.0824903	1.79547	0.0725784	0.996063	Hivep2
615.305	0.185407	0.103266	1.79542	0.0725866	0.996063	N4bp1
1959.6	0.129496	0.0721268	1.79539	0.0725915	0.996063	Tenm3
89.233	-0.499632	0.278318	-1.79518	0.0726244	0.996063	Sox2
527.212	0.220016	0.122611	1.79442	0.0727459	0.996063	Ptger3
343.961	0.266918	0.148763	1.79425	0.0727729	0.996063	Trpc6
2257.61	0.120375	0.0671151	1.79357	0.0728822	0.996063	Arhgap21
7098.5	-0.0917281	0.0511514	-1.79326	0.0729306	0.996063	Pea15a
659.299	0.181247	0.101108	1.79261	0.0730348	0.996063	Ddhd1
795.871	0.164626	0.0918369	1.79259	0.0730389	0.996063	Ddx50
446.443	0.207446	0.115812	1.79123	0.0732567	0.996063	Cblb
19633.4	0.137315	0.0766609	1.79121	0.0732603	0.996063	Pgm2l1
1562.42	0.156758	0.0875312	1.79089	0.0733114	0.996063	Fbxo11
342.34	-0.239332	0.133726	-1.78972	0.0734992	0.996063	Cad
722.573	0.180491	0.100849	1.78971	0.0735003	0.996063	Zfp644
1133.81	0.158293	0.0884748	1.78913	0.0735946	0.996063	Ubxn2a
532.12	0.22284	0.124563	1.78897	0.0736196	0.996063	Plcxd3
963.329	0.153639	0.0859042	1.7885	0.0736959	0.996063	Slc7a8
2042.27	0.164998	0.0922902	1.78782	0.0738052	0.996063	Zfp638
217.261	-0.378726	0.21185	-1.78771	0.0738228	0.996063	Gabrg1
569.759	0.230476	0.128995	1.7867	0.0739858	0.996063	Zc3h4
482.672	-0.21227	0.118865	-1.7858	0.0741313	0.996063	Vps26c
755.472	-0.175805	0.0984726	-1.78532	0.0742096	0.996063	Arpc5l
3363.94	-0.112427	0.0629965	-1.78465	0.0743175	0.996063	Immt
1836.32	0.143163	0.0802277	1.78446	0.0743493	0.996063	Rere
1607.24	-0.163414	0.0915884	-1.78422	0.0743872	0.996063	Atf3
1002.93	-0.149449	0.0837846	-1.78373	0.074467	0.996063	Ano10
2988.07	0.140881	0.0789972	1.78337	0.0745268	0.996063	Itga2
638.013	0.19148	0.107384	1.78313	0.074565	0.996063	Kif13a
1016.83	0.160678	0.0902077	1.7812	0.0748806	0.997363	Mfn1
273.27	-0.262167	0.147193	-1.7811	0.0748954	0.997363	Gm15564
647.117	-0.238837	0.134119	-1.78079	0.0749469	0.997363	Sv2b
280.663	-0.277661	0.156038	-1.77944	0.0751672	0.998893	Rhoc
486.268	0.213219	0.119928	1.77789	0.0754212	0.998893	Exosc9
226.839	-0.315951	0.177836	-1.77664	0.0756274	0.998893	Ets2
146.129	-0.350438	0.19753	-1.7741	0.0760463	0.998893	Ing2
408.828	0.217751	0.122802	1.77319	0.0761965	0.998893	Ddx21
3051.04	0.108812	0.0614988	1.76933	0.0768389	0.998893	Dgkg
418.071	-0.220102	0.124447	-1.76864	0.0769534	0.998893	Mrpl58
1670.7	-0.12892	0.0728966	-1.76853	0.0769723	0.998893	Diras1
349.327	-0.232852	0.131673	-1.76841	0.076992	0.998893	Pwp1
135.666	-0.391268	0.221449	-1.76685	0.0772528	0.998893	Ncan
802.033	-0.168024	0.0952269	-1.76446	0.0776542	0.998893	Cpne8
1083.64	-0.149798	0.0849316	-1.76375	0.0777742	0.998893	Tspan31
1006.47	0.159438	0.0904045	1.76361	0.0777982	0.998893	45359
909.804	0.156896	0.0889776	1.76332	0.0778466	0.998893	Mbd5
1036.21	-0.21007	0.119153	-1.76303	0.0778953	0.998893	Socs3
3523	0.106139	0.0602238	1.76242	0.0779989	0.998893	Sh3pxd2a
612.904	0.177828	0.100942	1.76168	0.0781228	0.998893	Rflnb
3452.75	0.11631	0.0660493	1.76095	0.0782467	0.998893	Adam22
352.28	-0.234323	0.133087	-1.76068	0.0782934	0.998893	Dact3
961.533	-0.165138	0.0937966	-1.7606	0.0783064	0.998893	Ttyh1
798.438	0.190878	0.108459	1.7599	0.0784243	0.998893	Syt14
89.52	-0.446826	0.253985	-1.75926	0.0785332	0.998893	Tarbp2
1414.24	-0.129774	0.0738249	-1.75786	0.0787718	0.998893	Slc3a2
2730.59	0.126527	0.0720099	1.75708	0.0789037	0.998893	Raph1
398.613	-0.241128	0.137293	-1.75631	0.0790362	0.998893	Cald1
2658.83	-0.124303	0.0708055	-1.75555	0.0791654	0.998893	Rhoa
2327.1	-0.110641	0.0630299	-1.75537	0.0791953	0.998893	Dcaf8
516.579	0.225268	0.128331	1.75536	0.0791973	0.998893	Egln1
222.319	-0.436128	0.248596	-1.75437	0.0793678	0.998893	Pdpn
992.699	0.148542	0.08468	1.75416	0.0794035	0.998893	Zfp275
891.71	0.181089	0.103255	1.75381	0.0794627	0.998893	Sos2
326.205	-0.247	0.140926	-1.7527	0.0796541	0.998893	Ubxn8
835.02	-0.171538	0.097958	-1.75114	0.0799218	0.998893	Mbp
981.461	-0.154504	0.0883074	-1.74961	0.0801851	0.998893	Gdap1l1
4018.51	-0.131648	0.0752473	-1.74953	0.0801988	0.998893	Cct7
926.273	-0.170476	0.0974764	-1.74889	0.0803099	0.998893	Eif3g
424.072	0.208566	0.11953	1.74489	0.0810044	0.998893	Plxdc2
853.006	0.195248	0.111935	1.7443	0.0811067	0.998893	Ncoa6
590.85	-0.188937	0.108323	-1.7442	0.0811245	0.998893	Yaf2
210.039	0.299247	0.171711	1.74274	0.0813794	0.998893	Snx29
336.346	-0.259546	0.148944	-1.74257	0.0814087	0.998893	Nifk
16368.2	0.128347	0.0736623	1.74237	0.0814429	0.998893	Myo5a
1428.55	0.14822	0.0853116	1.73739	0.0823183	0.998893	AW551984
1540.78	-0.127522	0.0733994	-1.73737	0.0823215	0.998893	Clic1
423.729	-0.210976	0.121441	-1.73728	0.0823384	0.998893	Ptcd2
573.118	-0.232356	0.133761	-1.7371	0.0823702	0.998893	Med19
3854.42	-0.112428	0.0647282	-1.73693	0.0823996	0.998893	Rab2a
181.716	-0.301814	0.173772	-1.73684	0.0824155	0.998893	Tfb1m
524.911	-0.190916	0.109975	-1.736	0.0825644	0.998893	Acyp2
291.004	0.26862	0.154755	1.73578	0.0826026	0.998893	Sik2
596.42	-0.179942	0.103671	-1.73571	0.082615	0.998893	Mblac2
325.261	-0.248423	0.143143	-1.73548	0.0826551	0.998893	Daxx
6167.59	-0.115732	0.0667203	-1.73458	0.0828147	0.998893	Stmn3
4279.77	0.123478	0.071192	1.73444	0.0828404	0.998893	Nav1
1018.04	0.166672	0.0961374	1.73369	0.0829739	0.998893	Dok6
1051.45	-0.162967	0.0940236	-1.73326	0.0830502	0.998893	Tvp23a
2249.06	-0.125766	0.0725704	-1.73303	0.0830907	0.998893	Ndufa4
669.274	0.202352	0.116823	1.73212	0.0832521	0.998893	Bcar1
187	0.374197	0.216188	1.73089	0.0834719	0.998893	Sema6a
100.344	-0.487384	0.281704	-1.73013	0.0836074	0.998893	Ears2
93.9579	0.460366	0.266089	1.73012	0.0836095	0.998893	Frg2f1
456.905	0.208464	0.120492	1.73011	0.0836105	0.998893	Med12
1643.29	-0.14898	0.0861499	-1.72931	0.0837542	0.998893	Rps9
254.65	-0.255684	0.147864	-1.72918	0.0837763	0.998893	Atg4d
288.921	0.280136	0.162049	1.72871	0.0838606	0.998893	Fgf14
2039.92	-0.131773	0.0762455	-1.72828	0.0839385	0.998893	Anapc2
345.834	-0.236197	0.136714	-1.72767	0.0840477	0.998893	Mrpl32
8891.58	0.10551	0.0610731	1.72761	0.0840589	0.998893	Slc7a14
2419.48	0.173538	0.100485	1.72701	0.0841657	0.998893	Nnat
4643.98	0.0964254	0.0558383	1.72687	0.0841914	0.998893	Cyp1b1
272.995	-0.246519	0.142758	-1.72683	0.084199	0.998893	Gcdh
2471	-0.11879	0.0687969	-1.72667	0.0842261	0.998893	Fabp5
3271.42	0.106453	0.0616522	1.72667	0.0842269	0.998893	Lgals8
872.497	-0.162745	0.0942582	-1.72659	0.084242	0.998893	Nop53
109.392	-0.423638	0.245519	-1.72548	0.0844408	0.998893	Dbpht2
176.49	0.387732	0.22476	1.72509	0.0845112	0.998893	Cdo1
3164.88	-0.11792	0.0683647	-1.72487	0.0845511	0.998893	Eml1
440.999	-0.209816	0.121714	-1.72385	0.0847356	0.998893	Trmt1
130.115	-0.454932	0.264014	-1.72314	0.0848637	0.998893	Syt6
635.406	0.178733	0.103759	1.72258	0.0849651	0.998893	Svil
461.91	0.20848	0.121039	1.72242	0.0849932	0.998893	Nsmaf
357.767	-0.230552	0.133942	-1.72129	0.0851983	0.998893	Rpl35a
6806.02	0.106323	0.0618332	1.71952	0.08552	0.998893	Chrna3
1851.22	0.144355	0.0839574	1.71938	0.0855448	0.998893	Nrp2
717.268	-0.185769	0.108051	-1.71927	0.0855653	0.998893	Acsbg1
318.221	0.270531	0.157541	1.71721	0.0859414	0.998893	Zfp646
96.1651	-0.440326	0.256449	-1.71701	0.0859767	0.998893	Rpia
2461.91	0.131724	0.0767649	1.71594	0.0861732	0.998893	Tanc1
569.075	-0.181592	0.10584	-1.71572	0.0862127	0.998893	Txndc15
681.068	-0.16951	0.098825	-1.71525	0.0862986	0.998893	Eef1d
837.812	-0.163667	0.0954442	-1.7148	0.0863828	0.998893	Tsr2
1869.39	0.131813	0.07688	1.71453	0.0864316	0.998893	Clcn5
113.415	-0.387153	0.225816	-1.71447	0.086443	0.998893	Hmgn2
2670.12	0.118653	0.0692122	1.71433	0.0864677	0.998893	Usp31
686.77	-0.194554	0.113492	-1.71425	0.0864821	0.998893	Mvk
1625.07	0.129094	0.0753548	1.71315	0.0866852	0.998893	Spred2
2178.05	-0.118054	0.0689149	-1.71303	0.0867063	0.998893	Rad21
93.738	-0.443754	0.259071	-1.71287	0.0867368	0.998893	Gm9954
803.489	-0.199359	0.116417	-1.71246	0.0868121	0.998893	Osbpl1a
537.513	-0.182646	0.106683	-1.71204	0.0868902	0.998893	Mgat1
945.55	0.172463	0.100754	1.71173	0.086947	0.998893	Dubr
276.44	-0.244386	0.142872	-1.71053	0.0871685	0.998893	Dhx16
444.686	0.204987	0.119897	1.70969	0.0873235	0.998893	Gm43376
4130.62	-0.0973722	0.0569658	-1.70931	0.0873937	0.998893	Epdr1
127.211	-0.370763	0.217086	-1.70791	0.0876531	0.998893	Fdx1
99.1488	-0.402477	0.235715	-1.70748	0.0877337	0.998893	Shroom2
1473.73	-0.127258	0.074564	-1.70669	0.0878797	0.998893	Bcap31
493.908	0.212162	0.124352	1.70613	0.0879831	0.998893	Mettl16
1593.94	0.13654	0.0800384	1.70594	0.0880199	0.998893	Zc3h15
4487.97	0.103536	0.0606964	1.70581	0.0880439	0.998893	Plekhm3
704.555	0.191921	0.112585	1.70468	0.0882548	0.998893	Sike1
814.155	0.163324	0.0958694	1.70361	0.0884546	0.998893	Mid2
483.339	0.21007	0.123317	1.7035	0.0884746	0.998893	Ar
119.412	-0.418854	0.245885	-1.70346	0.0884824	0.998893	Prx
245.085	-0.272876	0.160223	-1.7031	0.0885492	0.998893	Nr1d1
909.557	-0.208132	0.122246	-1.70257	0.0886491	0.998893	Aqp1
717.973	-0.171063	0.100475	-1.70254	0.0886546	0.998893	Plin2
882.19	-0.154973	0.0910339	-1.70237	0.0886866	0.998893	Gtf2f1
201.727	0.292089	0.171615	1.70201	0.0887541	0.998893	Dot1l
907.802	-0.152192	0.08943	-1.7018	0.0887922	0.998893	Dap3
1232.68	0.13671	0.0803332	1.70179	0.0887957	0.998893	Scaper
1676.02	0.126144	0.0741509	1.70118	0.0889084	0.998893	Tmcc3
783.123	-0.180667	0.106206	-1.7011	0.0889243	0.998893	Mal2
459.563	-0.201222	0.11829	-1.70109	0.0889262	0.998893	Ankrd13b
1550.22	0.17574	0.103311	1.70108	0.0889284	0.998893	Tnik
429.536	0.229012	0.13463	1.70105	0.0889335	0.998893	Zcchc7
889.489	0.19867	0.11681	1.70079	0.0889824	0.998893	Leng8
229.576	-0.297605	0.174983	-1.70077	0.0889868	0.998893	Scly
3267.83	-0.106597	0.0626882	-1.70043	0.0890509	0.998893	Dmtn
48489.2	0.10419	0.0612893	1.69996	0.089138	0.998893	Prune2
845.481	-0.183011	0.107657	-1.69994	0.0891416	0.998893	Gpam
180.777	-0.343944	0.202351	-1.69974	0.08918	0.998893	Patj
934.216	-0.147029	0.0865049	-1.69966	0.0891942	0.998893	Smim7
1024.23	0.143925	0.0847032	1.69917	0.0892879	0.998893	Pacsin2
1558.5	0.146118	0.0860223	1.69861	0.0893924	0.998893	Braf
163.233	-0.31146	0.183421	-1.69806	0.0894956	0.998893	Rps6ka1
1090.36	0.145164	0.0855429	1.69697	0.0897016	0.998893	Tub
92.0081	0.465301	0.274334	1.69611	0.0898646	0.998893	Tchp
881.281	-0.152784	0.0900976	-1.69576	0.089932	0.998893	Rtraf
433.939	0.217437	0.128224	1.69575	0.089933	0.998893	Stag1
309.502	-0.242991	0.143545	-1.69278	0.0904973	0.998893	Zfp874b
955.317	0.193743	0.114453	1.69277	0.0904988	0.998893	Chd2
158.514	0.337478	0.199494	1.69166	0.0907099	0.998893	Nova2
6122.29	-0.0918908	0.0543249	-1.6915	0.0907409	0.998893	Pfn2
2433.09	0.112193	0.0663657	1.69053	0.0909267	0.998893	Acsl1
425.992	-0.204687	0.121091	-1.69036	0.0909591	0.998893	Rab24
464.138	0.200739	0.118772	1.69012	0.0910053	0.998893	Srrm3
843.065	0.150049	0.0887856	1.69001	0.0910258	0.998893	Rad54l2
807.787	0.156891	0.0928803	1.68917	0.0911864	0.998893	Zfp609
2112.18	-0.1124	0.0665894	-1.68796	0.091419	0.998893	Parp1
487.639	0.200307	0.118749	1.68681	0.0916401	0.998893	Kat6a
2173.42	-0.121291	0.0719206	-1.68645	0.0917089	0.998893	Ndufs2
5008.83	0.0982942	0.0583008	1.68599	0.0917986	0.998893	Atp2c1
1059.14	0.1408	0.0835201	1.68582	0.0918303	0.998893	Ccp110
909.473	0.152502	0.0904816	1.68545	0.0919016	0.998893	Sh3d19
112.511	-0.468961	0.278389	-1.68455	0.0920754	0.998893	Prkcq
2938.46	-0.126876	0.0753257	-1.68436	0.0921116	0.998893	Pcbp2
820.522	-0.151272	0.0898146	-1.68427	0.0921296	0.998893	Colq
122.208	-0.41537	0.246742	-1.68342	0.0922939	0.998893	Lcmt2
440.403	0.25877	0.15372	1.68339	0.0923006	0.998893	Rexo1
244.475	0.298253	0.177208	1.68307	0.0923623	0.998893	Tshz1
729.796	0.169636	0.100793	1.68302	0.0923713	0.998893	Rprd1a
182.436	0.309221	0.18392	1.68128	0.0927082	0.998893	Prrt1
699.345	0.161381	0.0959935	1.68116	0.0927315	0.998893	Dgkd
355.691	-0.24125	0.143514	-1.68102	0.0927597	0.998893	Hist1h2bc
706.222	-0.163607	0.0973283	-1.68098	0.092766	0.998893	Pts
6722.43	0.0897201	0.0533875	1.68055	0.0928512	0.998893	Ubr4
96.8647	-0.411599	0.245003	-1.67998	0.0929615	0.998893	Bax
375.356	-0.224106	0.133401	-1.67994	0.0929691	0.998893	Tpgs1
262.224	-0.267191	0.159148	-1.67888	0.0931762	0.998893	Mon1a
287.415	0.270564	0.161163	1.67883	0.0931861	0.998893	Gemin7
969.644	0.15281	0.0910251	1.67877	0.0931963	0.998893	Phf3
325.551	-0.265052	0.157888	-1.67873	0.0932038	0.998893	Mier1
4219.1	0.0971789	0.0579424	1.67716	0.0935103	0.998893	Scarb2
1436.98	0.163395	0.0975139	1.67561	0.0938144	0.998893	Dennd4a
939.933	-0.150699	0.0899449	-1.67546	0.0938449	0.998893	Tceal8
1148.59	-0.153084	0.0914016	-1.67485	0.0939633	0.998893	Scn1b
294.276	0.253608	0.151452	1.67452	0.094029	0.998893	Fam160a1
108.376	0.379324	0.226552	1.67433	0.0940653	0.998893	Gm49759
179.329	0.317807	0.189892	1.67362	0.0942046	0.998893	Nedd9
468.302	-0.189552	0.113276	-1.67337	0.0942543	0.998893	Mpi
760.122	0.183978	0.110026	1.67212	0.0945001	0.998893	Col6a2
1313.79	0.131753	0.0788182	1.6716	0.0946023	0.998893	Socs2
3957.52	-0.122357	0.0732369	-1.6707	0.0947819	0.998893	Lgmn
1213.45	-0.155414	0.093026	-1.67065	0.0947913	0.998893	Spon1
1005.48	-0.155226	0.0929564	-1.66988	0.0949431	0.998893	AI593442
778.596	0.179782	0.107665	1.66982	0.0949541	0.998893	Pfkfb3
1079.54	0.183432	0.109891	1.66922	0.0950734	0.998893	Apold1
884.009	0.157247	0.0943953	1.66584	0.0957453	0.998893	Sobp
882.666	0.177635	0.106665	1.66536	0.0958407	0.998893	Dnmt1
143.233	-0.325962	0.195764	-1.66508	0.0958965	0.998893	Mrpl22
2002.92	0.12779	0.0767534	1.66494	0.0959251	0.998893	Rlim
605.851	0.182559	0.10965	1.66492	0.0959278	0.998893	Lztfl1
556.536	-0.189583	0.11391	-1.66432	0.0960488	0.998893	Rmc1
14011.7	-0.093369	0.0561087	-1.66407	0.0960979	0.998893	Ndfip1
586.651	-0.17431	0.104761	-1.66388	0.0961355	0.998893	Rimkla
124.613	-0.368937	0.22182	-1.66323	0.0962665	0.998893	Mpp3
203.488	-0.319979	0.192385	-1.66322	0.0962678	0.998893	Cln3
1093.32	0.141782	0.0852612	1.66292	0.0963289	0.998893	Peak1
276.938	0.26785	0.161138	1.66223	0.0964659	0.998893	Lcor
333.517	0.237518	0.142945	1.6616	0.0965922	0.998893	Yes1
599.986	0.189929	0.114331	1.66122	0.096669	0.998893	Slc22a23
243.01	-0.271311	0.163323	-1.66119	0.0966747	0.998893	Erg28
2772.7	0.11454	0.0689611	1.66093	0.0967271	0.998893	Apc2
2766.65	-0.102478	0.0617278	-1.66016	0.0968814	0.998893	Lamp2
742.13	0.174846	0.105381	1.65918	0.0970788	0.998893	Kif13b
2900.12	-0.142336	0.08579	-1.65912	0.0970911	0.998893	Uqcrc1
242.801	-0.263478	0.158854	-1.65861	0.0971936	0.998893	Bloc1s3
493.337	0.216139	0.130321	1.65851	0.0972143	0.998893	St3gal5
553.264	-0.180525	0.108892	-1.65784	0.0973503	0.998893	Tra2b
1486.23	-0.129159	0.0779545	-1.65685	0.0975508	0.998893	Uqcc1
1894.84	0.124416	0.0750962	1.65675	0.0975701	0.998893	Trappc8
100.511	0.426299	0.257363	1.65641	0.0976384	0.998893	Pdgfrb
948.685	-0.143375	0.0866335	-1.65496	0.0979322	0.998893	Micos10
406.91	0.218847	0.132244	1.65488	0.0979495	0.998893	Hcn4
308.781	0.274787	0.166122	1.65413	0.0981013	0.998893	Clic5
161.854	0.309632	0.187273	1.65337	0.0982559	0.998893	Ttc28
1602.34	0.121355	0.0734086	1.65315	0.0983011	0.998893	Slc35b4
474.604	-0.19616	0.118666	-1.65305	0.0983211	0.998893	Gmpr
25034.4	-0.0752561	0.0455287	-1.65294	0.0983435	0.998893	Reep5
183.154	-0.376693	0.228019	-1.65202	0.0985304	0.998893	Mtf2
1155.32	0.144016	0.0871761	1.65201	0.0985319	0.998893	Cse1l
163.4	-0.335248	0.203166	-1.65012	0.098918	0.998893	Nol9
263.192	-0.253402	0.153673	-1.64897	0.0991534	0.998893	Hs1bp3
165.771	0.312685	0.189655	1.6487	0.0992084	0.998893	Zfp809
714.827	0.197681	0.11996	1.64789	0.0993745	0.998893	Pdcd4
7849.94	-0.0946569	0.0574433	-1.64783	0.0993872	0.998893	Dctn1
587.427	-0.183558	0.111404	-1.64769	0.0994171	0.998893	Nipa2
721.388	0.212616	0.129052	1.64753	0.0994502	0.998893	Trim33
1760.76	-0.115977	0.0704267	-1.64677	0.099605	0.998893	Cnih1
461.784	0.199219	0.120997	1.64648	0.0996657	0.998893	Mettl14
4051.59	0.11927	0.072443	1.6464	0.0996817	0.998893	Arfgef1
492.283	0.203898	0.123918	1.64543	0.0998814	0.998893	Max
574.99	-0.178423	0.108448	-1.64524	0.0999202	0.998893	Slc4a2
6163.7	0.091566	0.05566	1.6451	0.09995	0.998893	Hectd4
5808.21	0.114633	0.0696943	1.64479	0.100013	0.998893	Tmed8
283.129	-0.245896	0.149591	-1.64379	0.10022	0.998893	C4b
374.886	0.232433	0.141443	1.6433	0.100322	0.998893	Klf8
127.707	0.369544	0.22492	1.643	0.100382	0.998893	Sclt1
678.028	0.162242	0.0987947	1.64221	0.100546	0.998893	Kcnh6
196.272	-0.290802	0.177082	-1.64219	0.100552	0.998893	Iah1
3355.68	-0.107098	0.0652208	-1.64208	0.100573	0.998893	Ankrd46
231.05	-0.258157	0.15726	-1.64159	0.100675	0.998893	Abhd3
137.988	-0.32382	0.197274	-1.64147	0.100699	0.998893	Ehhadh
10354.6	0.121827	0.0742921	1.63984	0.101039	0.998893	Peg3
727.732	-0.180917	0.110528	-1.63685	0.101662	0.998893	Ebf3
681.581	0.166743	0.101879	1.63667	0.1017	0.998893	Akap17b
400.977	-0.238524	0.14579	-1.63608	0.101822	0.998893	Kcna1
1253.18	-0.137863	0.084265	-1.63607	0.101826	0.998893	Tmed7
309.563	-0.238586	0.145898	-1.63529	0.101987	0.998893	Cavin3
1909.45	0.120426	0.073666	1.63476	0.1021	0.998893	Igf1r
509.611	-0.186745	0.114284	-1.63404	0.10225	0.998893	Ormdl3
88.0837	0.417281	0.255478	1.63334	0.102399	0.998893	Rbm46
1162.35	-0.142892	0.0875185	-1.6327	0.102531	0.998893	Cab39l
165.887	-0.369824	0.226543	-1.63247	0.102581	0.998893	Afap1l2
448.62	0.201265	0.123325	1.63199	0.102681	0.998893	Lgr4
249.235	0.246106	0.150872	1.63123	0.102842	0.998893	Elovl1
389.151	0.209822	0.128635	1.63114	0.102861	0.998893	Wnk2
3891.64	-0.117318	0.0719266	-1.63108	0.102873	0.998893	Tkt
492.218	0.19406	0.119051	1.63005	0.103091	0.998893	Ralgps1
761.418	0.184849	0.11342	1.62978	0.103149	0.998893	Dennd5b
21076	0.280552	0.172207	1.62915	0.103281	0.998893	Meg3
2487.23	0.154283	0.0947724	1.62793	0.10354	0.998893	Kcnk3
1265.33	0.135709	0.0833989	1.62723	0.103688	0.998893	Klhl24
459.301	-0.186865	0.11491	-1.62619	0.103909	0.998893	Serp2
119.909	0.364898	0.224414	1.626	0.103949	0.998893	Zfp729b
1987.67	0.119725	0.0736416	1.62578	0.103996	0.998893	Hip1
622.518	0.169793	0.104443	1.6257	0.104014	0.998893	Trnt1
406.523	0.195809	0.120455	1.62558	0.104039	0.998893	Lonrf1
829.155	0.172238	0.105998	1.62492	0.10418	0.998893	Tbcel
572.139	-0.192914	0.118743	-1.62464	0.10424	0.998893	Snhg14
1838.14	-0.118763	0.0731098	-1.62444	0.104281	0.998893	Rtcb
5242.6	-0.0909304	0.0559767	-1.62443	0.104283	0.998893	Cpe
550.307	0.209637	0.129081	1.62407	0.104361	0.998893	Arhgef3
280.619	0.232433	0.143265	1.6224	0.104718	0.998893	Ern1
2509.97	0.110225	0.0679682	1.62172	0.104864	0.998893	Fmn1
4290.33	0.136178	0.0839895	1.62137	0.104939	0.998893	Prkg1
485.394	-0.180676	0.111646	-1.61829	0.105599	0.998893	Nudt16l1
1545.74	0.122466	0.0757189	1.61738	0.105797	0.998893	Brd4
232.028	0.278739	0.172441	1.61643	0.106002	0.998893	Herc6
94.4646	-0.587186	0.363447	-1.6156	0.106181	0.998893	Col15a1
1129.73	0.137128	0.084903	1.61512	0.106285	0.998893	Armc8
456.805	0.198466	0.122918	1.61463	0.106391	0.998893	Zfp941
4459.27	0.12108	0.0750217	1.61393	0.106543	0.998893	Aff4
460.707	-0.287225	0.177979	-1.61381	0.106568	0.998893	Ddx3y
221.409	0.268067	0.166211	1.61281	0.106785	0.998893	Ganc
431.629	0.208135	0.129155	1.61151	0.107069	0.998893	Aff1
3059.88	0.130178	0.0808141	1.61083	0.107217	0.998893	Cysltr2
273.397	0.238087	0.147926	1.6095	0.107507	0.998893	Kdm6b
544.546	0.180464	0.112136	1.60934	0.107542	0.998893	Chuk
1160.51	-0.135452	0.0842221	-1.60827	0.107776	0.998893	Srsf7
7500.91	-0.335862	0.208905	-1.60773	0.107895	0.998893	Malat1
358.088	-0.214069	0.13316	-1.6076	0.107923	0.998893	Fbxo7
6663.58	-0.0855253	0.0532163	-1.60713	0.108026	0.998893	Hspb8
8306.19	0.106553	0.0663044	1.60702	0.10805	0.998893	Hsp90b1
144.183	0.365013	0.227162	1.60684	0.108089	0.998893	Masp1
376.583	-0.225187	0.140177	-1.60645	0.108175	0.998893	Pcolce2
3685.76	-0.110834	0.069007	-1.60612	0.108247	0.998893	Ap3b2
817.17	0.144553	0.090011	1.60595	0.108285	0.998893	Rai1
266.486	-0.252892	0.157484	-1.60583	0.108312	0.998893	Mier2
1579.71	0.137573	0.0858008	1.6034	0.108846	0.998893	Rab8b
413.025	0.204785	0.12779	1.60251	0.109042	0.998893	Zfp407
1591.89	-0.12141	0.0757758	-1.60223	0.109105	0.998893	Slc38a10
255.732	-0.245545	0.153319	-1.60153	0.10926	0.998893	Magoh
4372.24	0.133441	0.0833544	1.60088	0.109403	0.998893	Unc80
835.772	0.207824	0.129823	1.60083	0.109415	0.998893	Sbno2
2027.45	0.149506	0.0934136	1.60047	0.109494	0.998893	Bptf
522.982	-0.223356	0.139563	-1.6004	0.10951	0.998893	Kit
3077.76	0.0989388	0.0618525	1.59959	0.109689	0.998893	Setd7
1285.99	-0.156195	0.0976581	-1.59941	0.109729	0.998893	Kcnq2
135.211	-0.330346	0.206565	-1.59924	0.109767	0.998893	Nod1
196.061	-0.279254	0.174619	-1.59922	0.109772	0.998893	Axl
2768.21	0.13579	0.0849215	1.599	0.10982	0.998893	C530008M17Rik
1556.47	0.136859	0.0856071	1.59869	0.10989	0.998893	Samd12
724.359	0.153136	0.0957929	1.59862	0.109906	0.998893	Pias1
220.472	0.263035	0.164545	1.59856	0.109919	0.998893	Zscan29
368.579	0.215304	0.134716	1.59821	0.109996	0.998893	Man2a1
152.975	-0.311864	0.195157	-1.59802	0.110039	0.998893	Acyp1
2643.59	-0.124824	0.0781624	-1.59698	0.11027	0.998893	Uqcrh
206.389	0.271329	0.16992	1.5968	0.11031	0.998893	Parp8
201.779	-0.312562	0.195817	-1.5962	0.110445	0.998893	Xylt2
920.913	-0.140769	0.0881959	-1.5961	0.110467	0.998893	Mea1
700.591	0.162487	0.101805	1.59605	0.110477	0.998893	Igsf9b
221.212	0.271848	0.170386	1.59549	0.110603	0.998893	Socs6
278.219	0.231318	0.145028	1.59499	0.110715	0.998893	Zfp326
91.5718	0.451939	0.2834	1.5947	0.110779	0.998893	Myl12a
548.733	-0.173983	0.109137	-1.59417	0.110898	0.998893	Rhobtb2
358.351	0.229427	0.14393	1.59401	0.110933	0.998893	Zfp950
601.894	-0.214244	0.13441	-1.59395	0.110946	0.998893	Uqcr11
781.112	-0.149692	0.0939521	-1.59328	0.111097	0.998893	Slc7a7
1399.85	-0.161458	0.101357	-1.59296	0.111169	0.998893	Psmb6
502.446	0.192472	0.120863	1.59248	0.111276	0.998893	Amer1
442.685	0.214991	0.135043	1.59202	0.111379	0.998893	Bend4
1219.85	0.127689	0.0802067	1.592	0.111385	0.998893	Mosmo
583.408	0.165042	0.103679	1.59186	0.111415	0.998893	Ncbp3
377.355	-0.196408	0.123421	-1.59137	0.111527	0.998893	Cwc25
2979.56	0.114453	0.071922	1.59135	0.11153	0.998893	Fryl
1091.59	-0.137723	0.0865466	-1.59131	0.111539	0.998893	Vps11
747.536	-0.194838	0.122473	-1.59086	0.11164	0.998893	Myh10
853.093	0.206568	0.129865	1.59064	0.111691	0.998893	CT010467.1
2101.75	-0.114967	0.0722837	-1.5905	0.111723	0.998893	Pkia
2458.08	-0.105528	0.066395	-1.5894	0.111969	0.998893	Psmc1
317.424	-0.222391	0.140093	-1.58746	0.112409	0.998893	Tmtc2
117.817	-0.361013	0.227544	-1.58656	0.112612	0.998893	Slc16a6
124.494	0.347785	0.219366	1.58541	0.112873	0.998893	Gm37928
556.527	0.171233	0.108081	1.5843	0.113124	0.998893	Sbf2
5622.36	0.0937418	0.0591912	1.58371	0.113259	0.998893	Csde1
134.654	0.364659	0.230366	1.58295	0.113432	0.998893	Nxph3
724.56	0.161041	0.101763	1.58251	0.113534	0.998893	Mta1
1070.13	-0.128371	0.081119	-1.5825	0.113536	0.998893	Rdh11
593.108	-0.170457	0.107835	-1.58073	0.11394	0.998893	Fsd1
1842.96	-0.13863	0.0877121	-1.58051	0.113989	0.998893	Fbxo2
363.461	-0.213824	0.135338	-1.57992	0.114125	0.998893	Dgcr6
371.534	-0.229309	0.145143	-1.57989	0.114132	0.998893	Mal
1273.58	-0.124495	0.0788011	-1.57986	0.114139	0.998893	Mpz
330.316	0.278625	0.176376	1.57973	0.114169	0.998893	Dzip1
578.701	0.174537	0.110488	1.57969	0.114177	0.998893	Fem1c
1492.05	0.169907	0.10756	1.57965	0.114187	0.998893	Cep350
460.806	0.213673	0.135273	1.57957	0.114205	0.998893	Slc29a3
2793.18	0.148382	0.0939712	1.57902	0.114331	0.998893	Rsrp1
17179.2	0.0899708	0.0569833	1.5789	0.114359	0.998893	Cds2
401.519	-0.257501	0.163107	-1.57873	0.114398	0.998893	Ptgfrn
676.086	-0.164057	0.103971	-1.57791	0.114586	0.998893	Gmcl1
172.615	-0.362356	0.229769	-1.57704	0.114786	0.998893	Btf3l4
313.011	-0.216791	0.137482	-1.57687	0.114825	0.998893	Coil
1787.81	0.112131	0.0711411	1.57618	0.114983	0.998893	Plekha1
97.9219	-0.392801	0.249247	-1.57595	0.115037	0.998893	H2-DMa
286.738	-0.223201	0.141635	-1.57589	0.115052	0.998893	Hyi
175.139	0.290506	0.184399	1.57542	0.115159	0.998893	Cep57
376.179	-0.19786	0.125643	-1.57478	0.115307	0.998893	Fgfr1op
1352.96	0.125929	0.0799813	1.57448	0.115376	0.998893	Dnajc18
969.067	0.173307	0.110163	1.57319	0.115675	0.998893	Kmt2e
2253.7	-0.113165	0.0719537	-1.57275	0.115778	0.998893	Bag6
522.869	0.176815	0.112453	1.57234	0.115871	0.998893	Med15
103.095	-0.366183	0.233017	-1.57149	0.11607	0.998893	Poli
1132.04	0.158595	0.101046	1.56953	0.116524	0.998893	Slc12a7
184.675	0.275553	0.175576	1.56943	0.116549	0.998893	Cdyl2
117.913	-0.3521	0.224513	-1.56828	0.116815	0.998893	Mtg2
716.873	-0.171016	0.109048	-1.56826	0.116821	0.998893	Ephx1
777.149	0.186858	0.119188	1.56775	0.116939	0.998893	Mir100hg
94.3551	-0.371047	0.236698	-1.5676	0.116975	0.998893	Hmgb3
9726.48	0.0783781	0.0500242	1.5668	0.117161	0.998893	Cadm1
682.09	0.153771	0.0981828	1.56617	0.117308	0.998893	S100a11
921.878	-0.138962	0.0887523	-1.56573	0.117412	0.998893	Eftud2
1465.85	0.121264	0.0774571	1.56556	0.117452	0.998893	Ubr2
471.784	0.177817	0.113622	1.565	0.117584	0.998893	Ddx10
486.44	-0.180581	0.115499	-1.56349	0.117937	0.998893	Ssx2ip
611.319	-0.169948	0.10871	-1.56332	0.117977	0.998893	Mxra7
424.441	-0.189769	0.121449	-1.56254	0.118161	0.998893	Ranbp1
617.059	0.165719	0.106072	1.56233	0.118209	0.998893	Rab30
1112.57	-0.130608	0.0837042	-1.56035	0.118677	0.998893	Psma4
695.702	0.152835	0.097985	1.55978	0.118812	0.998893	Gpr89
178.785	0.282882	0.181442	1.55908	0.118978	0.998893	AC156546.1
187.533	-0.279115	0.17917	-1.55783	0.119274	0.998893	Rpl10
213.218	-0.259466	0.166737	-1.55614	0.119675	0.998893	Gas2
357.374	-0.201895	0.129814	-1.55527	0.119883	0.998893	Rnf25
294.246	0.259123	0.166611	1.55526	0.119885	0.998893	Tut4
4574.89	0.113537	0.073029	1.55468	0.120022	0.998893	Cdc42bpa
444.545	0.228606	0.147061	1.5545	0.120066	0.998893	Upf2
696.049	0.154266	0.0992418	1.55445	0.120078	0.998893	Ubn1
320.794	0.209628	0.134965	1.5532	0.120376	0.998893	Hcfc2
12521	-0.0742713	0.0478404	-1.55248	0.120548	0.998893	Calm2
491.352	0.1899	0.122508	1.55011	0.121116	0.998893	Nol8
7171.32	0.104593	0.0674906	1.54975	0.121202	0.998893	Spag9
2866.52	0.111246	0.0717862	1.54969	0.121217	0.998893	Impact
114.11	-0.407972	0.26327	-1.54963	0.12123	0.998893	Trmt44
469.196	0.196181	0.126623	1.54932	0.121304	0.998893	Dmkn
12547.4	0.113336	0.0731605	1.54914	0.121347	0.998893	Scn9a
383.446	0.210674	0.136011	1.54894	0.121395	0.998893	Zfp46
575.021	-0.182508	0.117862	-1.54849	0.121504	0.998893	Dcun1d2
720.896	-0.152184	0.0982807	-1.54847	0.12151	0.998893	Ehd2
1262.67	0.13434	0.0867909	1.54786	0.121656	0.998893	Amer2
2988.02	-0.100239	0.0647965	-1.54699	0.121866	0.998893	Fbxw11
8613.29	-0.0755356	0.0488779	-1.54539	0.122252	0.998893	Itm2b
279.57	-0.276753	0.179097	-1.54527	0.122281	0.998893	Fzd7
11288.1	-0.0839715	0.0543494	-1.54503	0.122339	0.998893	Prkar1b
12623.1	0.104031	0.0673443	1.54477	0.122402	0.998893	Ccser2
585.873	0.173496	0.112316	1.54472	0.122415	0.998893	3830406C13Rik
642.999	0.199323	0.129041	1.54464	0.122433	0.998893	Sdc4
574.745	0.168764	0.109264	1.54455	0.122455	0.998893	Zbtb1
258.795	-0.254693	0.164906	-1.54447	0.122474	0.998893	Arf2
211.389	0.283002	0.183243	1.54441	0.12249	0.998893	Tapbpl
5805.14	0.104873	0.0679073	1.54436	0.122501	0.998893	Wnk1
3428.63	-0.0914651	0.0592337	-1.54414	0.122555	0.998893	Snx10
531.305	0.18886	0.122313	1.54407	0.122571	0.998893	Dync2h1
150.445	-0.334277	0.21649	-1.54407	0.122571	0.998893	Rab4b
176.778	-0.302392	0.19585	-1.544	0.122589	0.998893	Hes1
2933.23	-0.100729	0.065288	-1.54284	0.12287	0.998893	Atpif1
725.952	-0.152426	0.0988117	-1.54259	0.122929	0.998893	Smarcb1
945.778	-0.142301	0.0922634	-1.54233	0.122993	0.998893	Ciapin1
284.7	-0.224705	0.145706	-1.54217	0.123031	0.998893	Zfyve19
4454.79	-0.0897188	0.0582401	-1.5405	0.123439	0.998893	Cand1
644.388	0.172738	0.112278	1.53849	0.123929	0.998893	Fam3c
206.05	0.330294	0.214693	1.53845	0.123939	0.998893	Cidea
1247.33	0.136528	0.0888341	1.53689	0.124321	0.998893	Gcc2
150.872	0.368331	0.239885	1.53545	0.124673	0.998893	Fuz
659.069	-0.166078	0.108204	-1.53486	0.124819	0.998893	Ndufa7
609.366	0.213545	0.139157	1.53456	0.124893	0.998893	Cdk5r1
2355.98	0.117988	0.0769123	1.53406	0.125015	0.998893	Chrnb3
1617.55	0.113729	0.0741723	1.53331	0.1252	0.998893	Daam1
2171.34	-0.122169	0.0796874	-1.5331	0.125251	0.998893	Tuba4a
3140.61	-0.146005	0.0952777	-1.53241	0.12542	0.998893	Fkbp8
1979.57	0.109955	0.0717607	1.53225	0.125461	0.998893	Bicd2
188.054	-0.280337	0.182992	-1.53196	0.125531	0.998893	4930412C18Rik
277.553	-0.250717	0.163667	-1.53187	0.125555	0.998893	Mcee
3110.78	0.132009	0.0861857	1.53168	0.125602	0.998893	Evi5
431.596	-0.188372	0.12301	-1.53135	0.125682	0.998893	Plcxd2
1304.57	0.121082	0.0790988	1.53076	0.125828	0.998893	Trak2
2737.74	-0.0957005	0.0625315	-1.53044	0.125909	0.998893	Trim36
267.584	-0.239059	0.15622	-1.53027	0.12595	0.998893	Lrrc20
252.773	0.239995	0.156893	1.52967	0.126097	0.998893	Recql5
1053.92	-0.555344	0.36347	-1.52789	0.126539	0.998893	Lypd1
1495.65	-0.111567	0.073027	-1.52774	0.126576	0.998893	Chtop
748.559	-0.143833	0.0941502	-1.52769	0.126589	0.998893	Dcaf11
1512.19	0.130565	0.0854994	1.52709	0.126739	0.998893	Unc5d
13938.6	0.0819324	0.0536637	1.52677	0.126817	0.998893	Ntrk2
423.705	0.179941	0.11787	1.52661	0.126857	0.998893	8030462N17Rik
418.083	0.180257	0.118242	1.52448	0.127389	0.998893	Dusp16
252.854	-0.258511	0.169653	-1.52376	0.127568	0.998893	Commd6
307.597	0.211932	0.139144	1.52311	0.127732	0.998893	Cenpj
315.971	-0.218438	0.143425	-1.52302	0.127754	0.998893	Nop2
504.351	0.198071	0.130058	1.52294	0.127773	0.998893	Atr
181.451	0.28912	0.190251	1.51968	0.128592	0.998893	Adcy6
468.425	0.179305	0.118028	1.51918	0.128718	0.998893	Vwa5b2
1103.8	0.175452	0.115494	1.51915	0.128725	0.998893	Glp1r
5177.05	0.094753	0.0623982	1.51852	0.128883	0.998893	Hmbox1
532.199	0.176368	0.116157	1.51836	0.128923	0.998893	Med13l
191.853	-0.27182	0.179087	-1.51781	0.129061	0.998893	Mex3d
109.137	-0.347149	0.22889	-1.51666	0.129352	0.998893	Srrd
18266.5	-0.109365	0.0721402	-1.51601	0.129517	0.998893	Tppp3
441.697	-0.180869	0.119327	-1.51575	0.129583	0.998893	Rnd2
403.075	-0.203281	0.134252	-1.51417	0.129982	0.998893	Naxd
266.656	-0.225798	0.149224	-1.51315	0.130242	0.998893	Prxl2b
402.547	-0.187677	0.124039	-1.51304	0.130269	0.998893	Zfp651
1017.59	0.16276	0.107586	1.51283	0.130323	0.998893	Cul4b
327.055	-0.204565	0.135261	-1.51237	0.13044	0.998893	Bysl
679.12	0.146316	0.0967465	1.51236	0.130442	0.998893	Fkbp5
1289.67	0.136439	0.0902415	1.51193	0.130551	0.998893	Mdn1
245.328	0.26095	0.172636	1.51157	0.130644	0.998893	Abitram
392.751	-0.216126	0.142983	-1.51155	0.130649	0.998893	Mtfr1
94.1496	-0.366686	0.242598	-1.5115	0.130662	0.998893	Gm26917
1073.61	-0.129987	0.0860127	-1.51125	0.130725	0.998893	Cdk5
1632.67	0.148966	0.0986235	1.51045	0.130928	0.998893	Nbeal1
1053.75	-0.139362	0.0922653	-1.51045	0.130928	0.998893	Efcab6
944.881	0.131664	0.0871765	1.51032	0.130962	0.998893	Castor2
100.287	0.387915	0.256923	1.50985	0.131082	0.998893	Slc18a1
2009.72	0.105388	0.0698069	1.50971	0.131117	0.998893	Rasal2
232.785	-0.241528	0.16011	-1.50852	0.131422	0.998893	Trmt10a
701.378	0.181466	0.120325	1.50813	0.131522	0.998893	Lrguk
1449.47	0.140261	0.0930163	1.50792	0.131575	0.998893	Supt16
339.136	0.225267	0.149392	1.50789	0.131582	0.998893	Nin
148.756	0.294829	0.195536	1.5078	0.131605	0.998893	Umad1
554.818	0.16599	0.110131	1.5072	0.131758	0.998893	Bex1
4391.02	-0.0848497	0.0563138	-1.50673	0.13188	0.998893	Ube2j1
2797.02	-0.0947054	0.0628764	-1.50621	0.132012	0.998893	Rad23b
619.134	0.179581	0.119264	1.50574	0.132134	0.998893	Smurf1
228.434	-0.296274	0.196769	-1.50569	0.132146	0.998893	4930447C04Rik
485.939	-0.253644	0.168467	-1.50561	0.132168	0.998893	Grik1
581.636	-0.158738	0.105433	-1.50558	0.132174	0.998893	Cops9
1217.03	-0.132309	0.0879001	-1.50522	0.132268	0.998893	Cerk
2148.32	0.101648	0.06757	1.50434	0.132494	0.998893	Cttn
2705.58	-0.0928673	0.0617921	-1.5029	0.132865	0.998893	Marcks
668.033	0.160305	0.106664	1.50289	0.132867	0.998893	Mnt
267.88	-0.233838	0.155599	-1.50282	0.132884	0.998893	Tvp23b
207.751	-0.254161	0.169143	-1.50264	0.132932	0.998893	Ccne1
1135.33	0.141088	0.0939357	1.50197	0.133106	0.998893	Hook3
124.978	0.320565	0.213447	1.50185	0.133136	0.998893	Nepro
272.314	0.257174	0.171248	1.50177	0.133158	0.998893	Gal
121.454	0.362639	0.241534	1.5014	0.133253	0.998893	Malsu1
2228.35	0.117266	0.0781288	1.50094	0.133372	0.998893	Fsd1l
437.759	-0.177531	0.118307	-1.50059	0.133461	0.998893	Nsmce4a
2157.9	-0.115347	0.0769132	-1.4997	0.133693	0.998893	Tmsb10
11841.8	-0.108748	0.0725231	-1.49949	0.133745	0.998893	Htr3a
114.435	-0.353295	0.235795	-1.49831	0.134052	0.998893	Pcdha11.1
1365.95	0.131397	0.0877196	1.49792	0.134154	0.998893	Emc2
1024.48	0.125653	0.0839183	1.49733	0.134309	0.998893	Hivep1
295.677	-0.21717	0.145085	-1.49685	0.134433	0.998893	Aimp2
214.608	0.260829	0.174257	1.49681	0.134443	0.998893	Ints13
655.055	0.155587	0.103995	1.4961	0.134628	0.998893	Sfmbt1
265.68	-0.232497	0.15544	-1.49574	0.134722	0.998893	Gk
653.701	-0.188348	0.125944	-1.49549	0.134787	0.998893	Atp1b2
282.293	0.231457	0.154783	1.49536	0.13482	0.998893	Map3k3
1100.57	0.131455	0.0879133	1.49528	0.13484	0.998893	Fam53c
2616.06	0.116307	0.0778736	1.49354	0.135296	0.998893	Faxc
4654.42	0.0809945	0.0542674	1.49251	0.135566	0.998893	45357
6328.67	-0.0801628	0.0537104	-1.4925	0.135568	0.998893	Lamp1
1343.61	0.138761	0.0930083	1.49192	0.13572	0.998893	Slc2a13
3549.19	0.0838778	0.0562274	1.49176	0.135762	0.998893	Clgn
580.334	-0.17222	0.115485	-1.49128	0.135888	0.998893	Trappc5
1895.06	0.140734	0.0943953	1.49091	0.135986	0.998893	Pcmtd1
1488.1	0.10908	0.0731668	1.49084	0.136004	0.998893	Chst15
139.301	0.300689	0.201776	1.49021	0.136169	0.998893	Cklf
18236.9	-0.0986017	0.0661711	-1.4901	0.136197	0.998893	Tubb5
310.639	-0.268121	0.18001	-1.48948	0.136362	0.998893	Slc44a5
361.753	0.215212	0.144499	1.48937	0.136391	0.998893	Sh3rf1
3671.85	-0.0882001	0.0592426	-1.4888	0.136541	0.998893	Ppp3cb
4538.45	-0.0934209	0.0627573	-1.48861	0.136591	0.998893	Mtch1
240.951	-0.277289	0.186361	-1.48791	0.136774	0.998893	D030056L22Rik
281.557	0.231602	0.155656	1.48791	0.136775	0.998893	Trp53bp2
315.178	-0.25189	0.169322	-1.48764	0.136846	0.998893	Haus6
2601.23	0.125354	0.084291	1.48716	0.136973	0.998893	Rbm39
404.561	0.203404	0.136955	1.48519	0.137495	0.998893	Tia1
130.555	0.371943	0.250503	1.48479	0.137601	0.998893	Exosc1
1128.76	0.131346	0.0884733	1.48459	0.137654	0.998893	Snx12
355.706	0.217539	0.146542	1.48447	0.137683	0.998893	Ldlrad3
2830.8	-0.0951148	0.0640758	-1.48441	0.1377	0.998893	Napg
603.273	-0.171809	0.115778	-1.48396	0.137821	0.998893	Tbc1d5
720.763	-0.152056	0.102601	-1.482	0.138339	0.998893	Ddx25
1405.58	-0.120418	0.0812767	-1.48159	0.138451	0.998893	Gatad1
3846.57	-0.103394	0.0697931	-1.48144	0.138489	0.998893	Fkbp4
611.754	-0.150003	0.101332	-1.48032	0.138789	0.998893	Acer3
384.028	-0.186967	0.12636	-1.47964	0.138971	0.998893	Tomm5
277.487	0.236166	0.159615	1.4796	0.138981	0.998893	Stard9
856.062	-0.134236	0.0907766	-1.47875	0.139207	0.998893	Vipas39
6464.54	0.116158	0.07859	1.47802	0.139402	0.998893	Akap11
1187.04	-0.130549	0.0883326	-1.47792	0.139429	0.998893	Edf1
657.534	0.153792	0.104083	1.47758	0.139519	0.998893	Ccdc93
1208.1	0.116476	0.078833	1.4775	0.139541	0.998893	Pogk
2466.85	0.108801	0.0736458	1.47736	0.139579	0.998893	Nalcn
490.718	-0.168355	0.113968	-1.4772	0.139621	0.998893	Zfp622
833.941	-0.148076	0.10026	-1.47692	0.139698	0.998893	Tuba1c
1901.83	0.139162	0.0942462	1.47658	0.139788	0.998893	Rock2
365.071	-0.192931	0.130692	-1.47623	0.139883	0.998893	Dars2
418.5	0.188437	0.127699	1.47564	0.140041	0.998893	Cep164
1677.91	-0.105774	0.0716824	-1.4756	0.140052	0.998893	Oasl2
3784	0.113358	0.0768222	1.47558	0.140055	0.998893	Arhgef12
724.052	-0.160791	0.109016	-1.47492	0.140233	0.998893	Dnpep
589.763	-0.17303	0.11734	-1.4746	0.140319	0.998893	Dcun1d5
367.924	-0.194529	0.13192	-1.4746	0.14032	0.998893	Trp53inp1
181.239	0.280243	0.190049	1.47458	0.140325	0.998893	Nrf1
445.242	-0.188686	0.127979	-1.47435	0.140388	0.998893	Pnrc2
216.649	0.294349	0.199711	1.47387	0.140516	0.998893	Jmjd6
716.917	0.143078	0.0971366	1.47296	0.140763	0.998893	Tmem87a
342.028	-0.19511	0.132463	-1.47294	0.140766	0.998893	Alg14
139.574	-0.362572	0.246161	-1.4729	0.140777	0.998893	Zbtb5
1002.43	-0.148119	0.100601	-1.47234	0.14093	0.998893	Pfdn2
246.63	0.262343	0.178286	1.47147	0.141163	0.998893	Ryr3
455.721	-0.175083	0.118997	-1.47132	0.141204	0.998893	Ctdnep1
538.559	0.174501	0.118625	1.47103	0.141282	0.998893	Inafm2
225.147	-0.238282	0.162024	-1.47066	0.141382	0.998893	Ssna1
204.36	0.262504	0.178503	1.47058	0.141405	0.998893	5730480H06Rik
595.392	0.168461	0.114557	1.47055	0.141414	0.998893	Greb1l
217.943	-0.26523	0.180428	-1.47	0.141562	0.998893	Hmgn1
1012.85	-0.130383	0.0887169	-1.46965	0.141655	0.998893	Hectd3
5021.49	0.0890316	0.060588	1.46946	0.141709	0.998893	P2rx2
1266	-0.122156	0.083143	-1.46923	0.141771	0.998893	Cuedc2
443.389	0.186642	0.127049	1.46906	0.141818	0.998893	Gm20008
260.865	0.29176	0.198694	1.46839	0.141999	0.998893	Ccng2
142.918	0.289855	0.197437	1.46809	0.142079	0.998893	Pxdc1
299.697	-0.204842	0.139545	-1.46793	0.142122	0.998893	0610009B22Rik
522.606	-0.187018	0.12745	-1.46738	0.142272	0.998893	Ust
184.708	-0.274164	0.186845	-1.46733	0.142286	0.998893	Ephb6
1191.74	-0.127665	0.0870067	-1.4673	0.142294	0.998893	Atp5h
713.912	0.154585	0.105388	1.46682	0.142425	0.998893	Lrch3
2889.32	-0.105288	0.0717973	-1.46647	0.142522	0.998893	Prdx2
730.115	-0.143036	0.0975659	-1.46605	0.142635	0.998893	Ppp1r21
186.911	-0.294187	0.200702	-1.46579	0.142705	0.998893	Mrps33
4722.49	0.0975125	0.0665447	1.46537	0.142821	0.998893	Tns1
22966.6	0.0755259	0.0515625	1.46474	0.142991	0.998893	Akap12
660.432	-0.15753	0.107611	-1.46388	0.143227	0.998893	Ostc
751.345	0.158561	0.108329	1.46369	0.143279	0.998893	Pnmal2
125.497	-0.32511	0.222157	-1.46342	0.143352	0.998893	Gm16551
408.956	-0.199775	0.136534	-1.46318	0.143417	0.998893	Hip1r
277.26	-0.217	0.148356	-1.46269	0.143552	0.998893	Tmem106a
125.478	0.326529	0.22326	1.46255	0.14359	0.998893	Bud23
123.234	0.310279	0.212271	1.46171	0.14382	0.998893	Slc35d1
120.546	-0.364451	0.249359	-1.46155	0.143864	0.998893	Fhdc1
1325.45	0.110086	0.0753244	1.46149	0.143881	0.998893	Dab2ip
290.415	0.252402	0.172732	1.46124	0.14395	0.998893	Prag1
4798.73	0.108764	0.0745099	1.45973	0.144365	0.998893	Trip12
789.197	0.140272	0.0961076	1.45953	0.144419	0.998893	Rbm6
169.89	-0.278441	0.190777	-1.45951	0.144425	0.998893	Ino80b
1348.98	-0.110754	0.075904	-1.45914	0.144527	0.998893	Tspan17
90.7312	-0.352406	0.241547	-1.45895	0.144578	0.998893	Alkbh7
210.701	0.244798	0.167825	1.45865	0.144662	0.998893	Myorg
577.977	-0.181341	0.124354	-1.45827	0.144768	0.998893	Nt5c3
1055.78	0.130968	0.0898417	1.45777	0.144904	0.998893	Ppip5k2
465.611	-0.176636	0.121234	-1.45698	0.145122	0.998893	Nenf
1530.85	-0.118284	0.0811932	-1.45682	0.145167	0.998893	Eepd1
108.475	0.355251	0.243904	1.45652	0.145248	0.998893	Cdon
199.528	-0.326281	0.224023	-1.45646	0.145264	0.998893	Calcb
952.904	-0.127911	0.0878654	-1.45576	0.145459	0.998893	U2af2
5550.72	-0.0796875	0.0547889	-1.45445	0.145823	0.998893	Zdhhc2
394.775	-0.181903	0.125155	-1.45343	0.146105	0.998893	Nop56
1672.15	0.11532	0.0793528	1.45326	0.146152	0.998893	Pik3ca
1822.29	-0.0983989	0.0677115	-1.45321	0.146166	0.998893	Atcay
800.405	-0.140819	0.0969351	-1.45272	0.146302	0.998893	Ptgr2
712.052	0.160956	0.110797	1.45271	0.146303	0.998893	Dip2b
643.201	-0.145164	0.0999491	-1.45238	0.146397	0.998893	Ddrgk1
455.991	-0.179774	0.123899	-1.45097	0.146787	0.998893	Cmpk2
185.768	-0.250961	0.172965	-1.45094	0.146797	0.998893	Dusp28
578.819	0.153574	0.105848	1.45089	0.146811	0.998893	Onecut2
3496.68	0.0984006	0.067823	1.45084	0.146823	0.998893	Rabep1
1081.49	0.129691	0.0893964	1.45074	0.146852	0.998893	Lancl2
93.7904	0.385418	0.265733	1.45039	0.146949	0.998893	Pcdha7
3327.34	-0.0999644	0.0689315	-1.4502	0.147003	0.998893	Actr1b
609.298	-0.147121	0.101479	-1.44976	0.147125	0.998893	Clns1a
194.959	0.246625	0.170174	1.44925	0.147268	0.998893	Zbtb21
1551.13	0.105539	0.0728896	1.44792	0.147639	0.998893	Rmnd5a
13955.7	-0.0955477	0.0659949	-1.4478	0.147672	0.998893	Nefm
1189.26	0.146481	0.101291	1.44615	0.148136	0.998893	Dmxl1
730.767	-0.156521	0.108288	-1.44541	0.148342	0.998893	Pbx2
421.947	-0.171105	0.11839	-1.44527	0.148381	0.998893	Skap2
196	-0.244084	0.168921	-1.44496	0.14847	0.998893	Ddt
370.234	-0.182396	0.126252	-1.4447	0.148542	0.998893	Sar1b
3055.59	0.0893389	0.0618437	1.44459	0.148573	0.998893	Synrg
4963.8	0.0838108	0.0580232	1.44444	0.148616	0.998893	Arf3
394.794	-0.182829	0.126593	-1.44423	0.148675	0.998893	Acbd4
195.626	0.294913	0.204244	1.44393	0.14876	0.998893	Ghdc
644.38	0.194458	0.134708	1.44355	0.148866	0.998893	Acvr2a
93.0258	0.372004	0.257782	1.4431	0.148993	0.998893	Rel
4942.56	0.0961587	0.0666342	1.44308	0.148997	0.998893	Hnrnpu
281.883	-0.22028	0.152667	-1.44288	0.149055	0.998893	Igtp
681.111	0.144382	0.100066	1.44287	0.149057	0.998893	Cr1l
410.518	-0.186457	0.129244	-1.44267	0.149114	0.998893	Lamtor5
179.599	0.273344	0.189484	1.44257	0.149141	0.998893	2010300C02Rik
1677.1	-0.113636	0.0788132	-1.44185	0.149346	0.998893	Psmd12
627.611	-0.19362	0.134352	-1.44113	0.149547	0.998893	Ednra
804.859	0.160214	0.111183	1.441	0.149584	0.998893	Spry4
425.387	0.196995	0.13674	1.44066	0.149682	0.998893	Pan3
901.452	-0.157191	0.109125	-1.44047	0.149736	0.998893	Tm7sf2
110.553	-0.398897	0.276936	-1.44039	0.149756	0.998893	Eya4
2333.16	-0.0922654	0.0640863	-1.4397	0.149951	0.998893	Psmb1
239.362	0.221037	0.153552	1.4395	0.15001	0.998893	Kirrel
735.685	-0.138786	0.0964222	-1.43936	0.15005	0.998893	Rspry1
397.067	-0.174697	0.121483	-1.43804	0.150424	0.998893	Arl6ip4
2534.14	0.107398	0.0747025	1.43768	0.150525	0.998893	Ahi1
123.12	0.325158	0.226206	1.43744	0.150592	0.998893	Olfm2
1474.95	0.112069	0.0779951	1.43688	0.150753	0.998893	Ist1
661.209	0.155932	0.108582	1.43608	0.150979	0.998893	Gtf2a1
11975.4	-0.0891609	0.0620986	-1.4358	0.15106	0.998893	Calm3
469.952	-0.161185	0.112271	-1.43568	0.151094	0.998893	Aph1b
10087.5	0.0746957	0.0520316	1.43558	0.151121	0.998893	Dnm3
293.315	0.20885	0.145595	1.43446	0.15144	0.998893	Klhl15
696.838	0.149128	0.103985	1.43413	0.151536	0.998893	Git2
883.786	0.132943	0.0927127	1.43392	0.151594	0.998893	Otud7b
628.708	0.146634	0.102269	1.43381	0.151626	0.998893	Derl2
4225.81	0.0965822	0.0673902	1.43318	0.151807	0.998893	Ralgapa1
180.473	0.249046	0.173942	1.43177	0.152209	0.998893	Senp1
9711.61	0.100279	0.0700387	1.43176	0.152211	0.998893	Tmod2
481.284	-0.161991	0.113172	-1.43136	0.152326	0.998893	Slc25a44
2547.11	0.100945	0.0705325	1.43118	0.152378	0.998893	Npy2r
168.442	0.297129	0.207622	1.4311	0.1524	0.998893	Zkscan2
490.876	-0.175985	0.122978	-1.43102	0.152424	0.998893	S100a13
9099.98	0.0754977	0.0527582	1.43101	0.152426	0.998893	Gnal
103.626	-0.371993	0.25998	-1.43085	0.152473	0.998893	Shh
154.939	0.325077	0.227248	1.43049	0.152575	0.998893	Rbm4b
387.263	-0.205376	0.143572	-1.43047	0.152581	0.998893	Nsmce2
121.055	-0.301574	0.210848	-1.43029	0.152633	0.998893	Pdcd2l
3278.98	-0.0919201	0.0642711	-1.43019	0.152661	0.998893	Tspyl1
784.724	0.158558	0.110942	1.4292	0.152948	0.998893	Sgms1
1398.52	-0.112194	0.0785478	-1.42835	0.153191	0.998893	Rps11
3905.34	0.143268	0.100332	1.42795	0.153307	0.998893	Taok1
46851.6	-0.0629882	0.0441394	-1.42703	0.153572	0.998893	Hsp90ab1
870.778	0.14526	0.101795	1.42698	0.153585	0.998893	Sh3pxd2b
1362.46	-0.111949	0.0785072	-1.42597	0.153876	0.998893	Retreg2
89.2534	0.378157	0.265217	1.42584	0.153914	0.998893	Zfp575
283.771	-0.20385	0.143034	-1.42519	0.154103	0.998893	Tcn2
959.246	-0.131788	0.0924842	-1.42498	0.154163	0.998893	Chmp1a
382.98	-0.19113	0.13415	-1.42475	0.154231	0.998893	Dis3l2
122.597	-0.348868	0.244868	-1.42472	0.154238	0.998893	Dennd2a
1311.79	0.125953	0.0884178	1.42452	0.154296	0.998893	Xpot
4622.68	0.0795243	0.0558342	1.42429	0.154362	0.998893	Camk2a
590.078	-0.16105	0.113077	-1.42426	0.154371	0.998893	Ngrn
614.646	-0.148274	0.104115	-1.42413	0.154408	0.998893	Wdr77
169.693	0.291204	0.204556	1.42359	0.154565	0.998893	Popdc3
328.908	-0.244787	0.172037	-1.42287	0.154774	0.998893	Plekha4
90.1156	0.377801	0.265553	1.42269	0.154826	0.998893	Arid3b
562.464	0.188686	0.132645	1.42248	0.154886	0.998893	Kdm6a
183.723	0.28387	0.199636	1.42194	0.155045	0.998893	Ppp1r26
3146.3	0.0963068	0.0677488	1.42153	0.155164	0.998893	Ncor1
247.375	-0.243575	0.171391	-1.42117	0.155269	0.998893	Gprin1
335.633	0.243264	0.171353	1.41967	0.155705	0.998893	Sphkap
3113.52	-0.0906761	0.0638742	-1.4196	0.155723	0.998893	Map1lc3b
264.561	0.224509	0.158151	1.41959	0.155728	0.998893	Afap1
98.0344	0.330842	0.233107	1.41927	0.155821	0.998893	Eln
411.021	0.181022	0.127546	1.41927	0.155822	0.998893	Zfp354c
1396.79	0.107276	0.0756033	1.41893	0.155918	0.998893	Slc25a51
129.816	0.302633	0.213287	1.4189	0.155928	0.998893	Invs
222.671	-0.224283	0.15811	-1.41853	0.156036	0.998893	Sf3a2
2010.57	0.0951314	0.0670824	1.41813	0.156154	0.998893	Pacs2
577.11	0.150128	0.105872	1.41801	0.156188	0.998893	Lgi1
351.676	-0.192982	0.136133	-1.41759	0.156309	0.998893	Pctp
1190.6	0.111877	0.0789296	1.41743	0.156356	0.998893	Zmynd8
278.681	-0.219185	0.154704	-1.41681	0.156539	0.998893	Cox14
168.163	-0.278971	0.196997	-1.41611	0.156742	0.998893	Rmi1
1091.23	0.132393	0.0935097	1.41582	0.156828	0.998893	Strbp
906.636	0.142942	0.100982	1.41552	0.156917	0.998893	Ankhd1
130.732	-0.306466	0.216521	-1.41541	0.156948	0.998893	Plgrkt
124.312	-0.329043	0.232478	-1.41537	0.156959	0.998893	Tecta
323.753	0.219913	0.155399	1.41514	0.157026	0.998893	Ston2
303.859	-0.216012	0.152663	-1.41496	0.157081	0.998893	Trappc2l
406.847	0.203346	0.143745	1.41464	0.157175	0.998893	Unc13b
126.161	0.299027	0.211386	1.4146	0.157186	0.998893	Hmgn5
988.178	0.120729	0.0853488	1.41454	0.157204	0.998893	Cobl
1006.64	-0.119793	0.0847035	-1.41426	0.157284	0.998893	Dnajc14
577.536	0.169835	0.120242	1.41244	0.15782	0.998893	Cntnap5a
161.187	0.264844	0.187532	1.41226	0.157874	0.998893	Cdk18
316.171	0.189058	0.133875	1.4122	0.157891	0.998893	Pcgf1
99.891	-0.353094	0.25005	-1.41209	0.157923	0.998893	Stk26
142.971	-0.301452	0.213501	-1.41194	0.157967	0.998893	Uap1l1
153.713	-0.274023	0.194178	-1.41119	0.158188	0.998893	Prorp
466.863	0.161995	0.114795	1.41117	0.158195	0.998893	Kctd16
2452.99	0.112308	0.0796437	1.41013	0.1585	0.998893	Pcdh17
1363.51	-0.117042	0.0830011	-1.41012	0.158504	0.998893	Eif3l
287.468	-0.225112	0.15965	-1.41003	0.15853	0.998893	Mrpl2
209.955	-0.275991	0.195745	-1.40995	0.158553	0.998893	Pus7
101.551	0.349014	0.247545	1.4099	0.158569	0.998893	Htr5b
208.407	-0.238705	0.169376	-1.40932	0.15874	0.998893	Surf6
158.475	0.327232	0.232208	1.40922	0.15877	0.998893	Slc30a6
579.714	-0.149015	0.105766	-1.40891	0.158861	0.998893	Psma5
5692.31	0.0864679	0.0613798	1.40874	0.158913	0.998893	Trim44
1644.08	0.114632	0.0813808	1.40859	0.158956	0.998893	C1qtnf7
661.301	0.156339	0.111004	1.40842	0.159007	0.998893	Zkscan8
399.676	-0.183549	0.130343	-1.4082	0.159071	0.998893	45539
183.956	-0.259187	0.184146	-1.40751	0.159278	0.998893	Mrm3
971.826	0.125353	0.0890778	1.40723	0.159359	0.998893	Ccdc88a
235.825	-0.222875	0.158392	-1.40711	0.159395	0.998893	Rufy1
559.339	-0.177999	0.126534	-1.40672	0.15951	0.998893	Pex6
4266	-0.087765	0.0623954	-1.4066	0.159547	0.998893	Rangap1
670.306	-0.14007	0.0995825	-1.40657	0.159554	0.998893	Asrgl1
473.087	-0.167891	0.119412	-1.40598	0.159729	0.998893	A830018L16Rik
560.011	0.177889	0.12654	1.40579	0.159785	0.998893	C130074G19Rik
2261.79	0.137425	0.097757	1.40578	0.159789	0.998893	Bod1l
882.498	-0.13071	0.0930455	-1.40479	0.160083	0.998893	Pde6d
3310.3	-0.0812591	0.0578592	-1.40443	0.160191	0.998893	Cct6a
976.869	0.1191	0.0849019	1.4028	0.160678	0.998893	Arhgap23
898.948	-0.121704	0.0867822	-1.4024	0.160794	0.998893	Ccdc91
2503.26	-0.0952477	0.0679424	-1.40189	0.160948	0.998893	Mid1ip1
124.533	0.314645	0.22446	1.40179	0.160979	0.998893	Hepacam
105.015	0.349526	0.249467	1.40109	0.161187	0.998893	Zfp820
218.63	0.22984	0.164059	1.40095	0.161228	0.998893	N4bp2l1
1510.59	-0.102805	0.0734096	-1.40043	0.161384	0.998893	Drg1
868.514	0.128637	0.0919035	1.39969	0.161605	0.998893	Ccdc50
682.413	0.15807	0.112972	1.39919	0.161755	0.998893	Rps6kb1
678.295	-0.137038	0.0979447	-1.39913	0.161773	0.998893	Sgpp1
143.013	-0.283636	0.202744	-1.39899	0.161816	0.998893	Zfand1
698.097	-0.134582	0.0962012	-1.39896	0.161825	0.998893	Phkg2
122.808	0.319383	0.228325	1.39881	0.16187	0.998893	Zfp697
439.023	0.18244	0.130449	1.39856	0.161945	0.998893	Tmem175
18513.6	0.0813076	0.0581705	1.39775	0.162189	0.998893	Cltc
827.151	-0.150247	0.107493	-1.39773	0.162194	0.998893	Hs2st1
569.255	0.162354	0.116197	1.39723	0.162343	0.998893	Jak2
132.489	0.286644	0.205186	1.397	0.162415	0.998893	Rfx3
4063.48	0.0840506	0.0601695	1.3969	0.162444	0.998893	Ctif
1602.72	0.10704	0.0766283	1.39688	0.162451	0.998893	Trrap
113.626	-0.324592	0.232413	-1.39662	0.162528	0.998893	Npepl1
11639.8	-0.0900916	0.0645086	-1.39658	0.162539	0.998893	Phf24
389.665	-0.173935	0.124555	-1.39646	0.162577	0.998893	Timmdc1
510.643	0.154284	0.110499	1.39625	0.16264	0.998893	Dcun1d3
131.338	-0.313426	0.224526	-1.39594	0.162731	0.998893	Trnau1ap
975.893	-0.120548	0.0863867	-1.39545	0.162882	0.998893	Gm13889
377.234	0.196051	0.140507	1.39531	0.162921	0.998893	Cnnm3
559.475	-0.151623	0.108696	-1.39492	0.16304	0.998893	Arsb
2793.31	-0.10451	0.0749279	-1.39481	0.163072	0.998893	Psmc3
101.399	0.328489	0.235513	1.39478	0.163083	0.998893	Fam111a
201.402	0.240004	0.17218	1.39391	0.163344	0.998893	Bclaf3
246.008	0.214024	0.153553	1.39381	0.163376	0.998893	Gm14325
164.005	-0.268226	0.192447	-1.39376	0.163389	0.998893	Ppil1
526.044	0.179177	0.128571	1.39361	0.163435	0.998893	Rock1
159.7	-0.274281	0.196826	-1.39351	0.163464	0.998893	Slc39a1
383.947	-0.171448	0.123047	-1.39336	0.163512	0.998893	Micos13
4392.16	0.0979529	0.0703036	1.39328	0.163534	0.998893	Tbx3
509.434	-0.161029	0.115621	-1.39272	0.163703	0.998893	Rpl26
1351	0.109136	0.0783819	1.39236	0.163813	0.998893	Cyld
279.962	-0.211773	0.152191	-1.39149	0.164075	0.998893	4632428C04Rik
559.468	-0.153694	0.110462	-1.39137	0.164112	0.998893	Pdpr
491.015	0.169414	0.121774	1.39122	0.16416	0.998893	Rgl1
922.228	0.149928	0.107772	1.39116	0.164175	0.998893	Nemf
166.476	0.283227	0.20364	1.39082	0.164279	0.998893	Slx4ip
332.496	-0.197122	0.141783	-1.39031	0.164434	0.998893	Robo1
6386.02	0.101805	0.073238	1.39005	0.164513	0.998893	Lnpep
9449.85	-0.0883304	0.0635547	-1.38983	0.16458	0.998893	Trarg1
223.46	0.229008	0.164825	1.3894	0.164711	0.998893	Ripk2
776.155	-0.133382	0.096015	-1.38917	0.16478	0.998893	Fbxo38
605.934	0.148555	0.106951	1.389	0.164834	0.998893	Lrrc47
1871.2	-0.0975142	0.0702324	-1.38845	0.165	0.998893	Tmem63b
1881.01	-0.102187	0.0736077	-1.38826	0.165058	0.998893	Fbxo31
93.2963	0.3365	0.242411	1.38814	0.165096	0.998893	St6galnac3
193.11	-0.243866	0.175764	-1.38746	0.165301	0.998893	Gamt
213.444	-0.246168	0.17755	-1.38647	0.165603	0.998893	Rps18
108.279	-0.313033	0.2259	-1.38572	0.165834	0.998893	Bend3
766.187	-0.135373	0.097696	-1.38566	0.165852	0.998893	Fam114a2
987.143	0.142692	0.103031	1.38493	0.166072	0.998893	Spata13
2211.27	0.0977875	0.0706223	1.38465	0.166158	0.998893	Rtn4rl1
10052.5	-0.0962822	0.0695506	-1.38435	0.166252	0.998893	Syp
2010.94	-0.0941959	0.0680537	-1.38414	0.166315	0.998893	Reep2
551.233	0.169437	0.122487	1.3833	0.166572	0.998893	Btbd10
237.747	0.220868	0.159688	1.38312	0.166628	0.998893	Tacr3
994.312	0.120683	0.0873171	1.38213	0.166932	0.998893	Tpm4
2143.83	-0.0927269	0.0670938	-1.38205	0.166957	0.998893	Gclm
258.063	-0.224972	0.162793	-1.38195	0.166987	0.998893	Cryab
1576.38	0.10258	0.0742541	1.38147	0.167133	0.998893	Abcd3
462.317	-0.20576	0.148969	-1.38122	0.167211	0.998893	Olfml2a
1150.33	0.110865	0.0803223	1.38025	0.167511	0.998893	Rbbp6
1627.17	-0.103296	0.0748487	-1.38006	0.167567	0.998893	Pi4k2a
405.102	-0.195413	0.141684	-1.37921	0.167829	0.998893	Fkrp
273.612	0.21209	0.153812	1.37889	0.167928	0.998893	Ajm1
844.247	0.14099	0.10225	1.37888	0.167932	0.998893	Wdr11
125.119	0.28726	0.208375	1.37857	0.168027	0.998893	Mterf4
1312.11	0.1304	0.0946371	1.37789	0.168237	0.998893	Pnpla8
878.805	0.123229	0.0894527	1.37759	0.168329	0.998893	Abcc4
5156.83	0.0908949	0.0660367	1.37643	0.168688	0.998893	45542
232.618	-0.216287	0.157266	-1.3753	0.169039	0.998893	Jtb
226.783	-0.218257	0.158723	-1.37509	0.169105	0.998893	Tut1
591.521	-0.146722	0.106721	-1.37482	0.169189	0.998893	Ndufa3
1104.96	-0.111397	0.0810607	-1.37424	0.169368	0.998893	Sugp2
444.488	-0.178994	0.130297	-1.37373	0.169524	0.998893	Gpr45
258.901	0.231612	0.168651	1.37332	0.169653	0.998893	Zfp729a
902.758	0.144673	0.105362	1.37311	0.169718	0.998893	Iqsec2
110.481	0.362942	0.264356	1.37293	0.169774	0.998893	Neat1
168.654	-0.290684	0.211738	-1.37285	0.169799	0.998893	Lgi3
143.188	0.289882	0.211251	1.37222	0.169996	0.998893	Samd4
195.702	-0.240496	0.175291	-1.37198	0.170069	0.998893	Rpl38
1302.92	0.113688	0.0828711	1.37187	0.170105	0.998893	Zfhx2
534.366	0.178017	0.1298	1.37148	0.170227	0.998893	2610001J05Rik
193.308	-0.268789	0.196033	-1.37114	0.170331	0.998893	Tyw5
402.011	0.191113	0.139393	1.37104	0.170363	0.998893	Alkbh8
178.554	0.284911	0.207846	1.37078	0.170445	0.998893	Alms1
2960.97	-0.0939267	0.0685253	-1.37069	0.170473	0.998893	Cltb
226.461	0.216255	0.157819	1.37027	0.170602	0.998893	Cdk8
1059.75	0.118229	0.0862958	1.37004	0.170674	0.998893	Nlk
746	0.134756	0.0983691	1.3699	0.170718	0.998893	Akap8l
15593.1	-0.0878763	0.0641651	-1.36953	0.170832	0.998893	Tuba1a
700.787	0.131846	0.0962739	1.36949	0.170845	0.998893	P4ha3
833.576	-0.13895	0.101496	-1.36902	0.170994	0.998893	Ndufs4
112.103	-0.304866	0.222744	-1.36868	0.171098	0.998893	Plin3
309.137	0.189641	0.138581	1.36845	0.171171	0.998893	Dchs1
182.28	0.238958	0.174649	1.36822	0.171244	0.998893	Rbm15
549.514	-0.154429	0.112937	-1.36739	0.171502	0.998893	Cog3
1640.88	-0.12795	0.0935737	-1.36738	0.171507	0.998893	Rps15
645.268	0.167908	0.122799	1.36734	0.17152	0.998893	5330434G04Rik
89.7457	0.335157	0.245208	1.36683	0.171679	0.998893	Flt3l
740.205	-0.152332	0.111483	-1.36642	0.171807	0.998893	Plekhd1
2012.43	-0.0913137	0.0668321	-1.36632	0.17184	0.998893	Sars
362.538	0.173274	0.126861	1.36586	0.171984	0.998893	Mamld1
194.858	0.242575	0.17764	1.36554	0.172082	0.998893	Ttc39a
2187.45	-0.0915683	0.0670892	-1.36487	0.172293	0.998893	Hacd3
275.064	-0.196089	0.143713	-1.36445	0.172427	0.998893	Med8
89.8732	-0.36109	0.26468	-1.36425	0.172489	0.998893	Gstcd
122.443	-0.302991	0.222231	-1.36341	0.172754	0.998893	Camkv
176.778	0.251441	0.184582	1.36222	0.173129	0.998893	Med6
514.316	-0.160932	0.118193	-1.3616	0.173323	0.998893	Decr1
120.313	-0.300326	0.22057	-1.36159	0.173326	0.998893	Stradb
495.045	-0.163272	0.119929	-1.3614	0.173387	0.998893	Eif6
363.977	-0.211484	0.155416	-1.36076	0.173588	0.998893	Elf2
670.671	-0.140127	0.103008	-1.36035	0.173718	0.998893	Hsd17b4
7598.44	0.0936225	0.0688373	1.36006	0.173812	0.998893	Hsp90aa1
372.094	-0.174711	0.128459	-1.36005	0.173813	0.998893	Klc4
3525.31	-0.107934	0.0793777	-1.35975	0.173909	0.998893	Ckb
457.032	0.214847	0.158041	1.35944	0.174008	0.998893	Mccc1
1195.71	-0.107187	0.0788565	-1.35927	0.174063	0.998893	Slc1a4
15949.8	-0.0929356	0.0684015	-1.35868	0.174249	0.998893	Eef1a2
462.268	0.15701	0.115564	1.35864	0.174261	0.998893	Rsbn1l
894.403	-0.128885	0.0949048	-1.35804	0.174451	0.998893	Dync1i1
495.565	-0.1604	0.11813	-1.35782	0.174521	0.998893	Tars
13355.5	0.0810216	0.0596944	1.35727	0.174694	0.998893	Uhmk1
332.021	-0.197168	0.145389	-1.35615	0.175053	0.998893	Tbl3
1928.98	0.0990566	0.0730476	1.35606	0.175081	0.998893	Cul2
15074.5	-0.101436	0.0748132	-1.35586	0.175144	0.998893	Pkm
1209.59	-0.105631	0.0779236	-1.35557	0.175237	0.998893	Ralyl
1868.66	-0.095121	0.07019	-1.35519	0.175356	0.998893	Pdhb
95.5071	0.320939	0.236874	1.35489	0.175452	0.998893	Fras1
97.997	-0.320142	0.236326	-1.35466	0.175526	0.998893	Ube2s
857.084	0.125051	0.0923438	1.35419	0.175676	0.998893	Wipi1
3594.19	0.102773	0.0759241	1.35363	0.175855	0.998893	Zeb2
1014.86	0.125622	0.0928129	1.3535	0.175896	0.998893	Ppp6r3
238.389	-0.228803	0.16908	-1.35322	0.175986	0.998893	Rpl37a
2513.38	0.0857759	0.0634058	1.35281	0.176117	0.998893	Trio
92.788	-0.410065	0.303194	-1.35248	0.176221	0.998893	Ets1
3500.16	-0.0798274	0.0590445	-1.35199	0.176379	0.998893	Slc9a9
390.928	0.182309	0.134861	1.35183	0.17643	0.998893	Slc30a4
232.531	0.22271	0.164761	1.35171	0.176467	0.998893	Mllt10
1293.48	-0.112695	0.0833982	-1.35129	0.176604	0.998893	Sh3bp5l
641.938	-0.155363	0.11498	-1.35121	0.176627	0.998893	Lsm14a
627.096	-0.167846	0.12428	-1.35055	0.176841	0.998893	Cisd2
2042.85	0.112295	0.0831612	1.35033	0.17691	0.998893	Slc12a2
1553.67	-0.112662	0.0834593	-1.3499	0.177047	0.998893	Ola1
111.867	0.346901	0.257006	1.34978	0.177086	0.998893	S1pr1
1753.71	0.118507	0.0878081	1.34961	0.17714	0.998893	Dzip3
168.76	-0.317282	0.235101	-1.34956	0.177158	0.998893	Jag1
556.806	0.189595	0.140589	1.34858	0.177472	0.998893	Dusp8
918.882	-0.135171	0.100239	-1.34848	0.177504	0.998893	Ppp1r12c
1014.32	0.11759	0.0872018	1.34848	0.177504	0.998893	Ccdc136
954.49	-0.119214	0.0884474	-1.34785	0.177705	0.998893	Fitm2
119.589	0.305404	0.226595	1.3478	0.177722	0.998893	Cntrl
347.499	-0.199333	0.147953	-1.34727	0.177892	0.998893	Insyn1
301.656	0.190607	0.141489	1.34715	0.177932	0.998893	Lrba
418.646	-0.174729	0.129859	-1.34552	0.178457	0.998893	Kank4
477.888	-0.161704	0.120202	-1.34526	0.17854	0.998893	Susd5
1213.59	-0.107275	0.0797902	-1.34446	0.1788	0.998893	Gfm1
366.773	-0.174134	0.129526	-1.34439	0.178823	0.998893	Fcgrt
565.998	-0.155987	0.116059	-1.34403	0.178939	0.998893	Arfgap3
984.551	0.171706	0.127756	1.34401	0.178944	0.998893	Gpx3
713.873	0.138292	0.102912	1.34378	0.17902	0.998893	Uba5
711.387	0.128295	0.0955135	1.34321	0.179204	0.998893	Ssh2
374.457	0.200517	0.149306	1.34299	0.179275	0.998893	Rif1
228.494	0.219776	0.163738	1.34224	0.179518	0.998893	Ankrd44
128.363	-0.367837	0.27411	-1.34193	0.179617	0.998893	Sgk3
1451.55	0.112425	0.083784	1.34184	0.179648	0.998893	Stox2
729.71	0.153662	0.114555	1.34139	0.179794	0.998893	Elavl1
1793.17	0.100763	0.075177	1.34035	0.180133	0.998893	Crebrf
272.158	-0.201373	0.150242	-1.34033	0.180138	0.998893	Ruvbl2
7384.92	0.124354	0.0927799	1.34031	0.180144	0.998893	mt-Rnr1
560.896	-0.168792	0.125959	-1.34006	0.180226	0.998893	Psmb3
203.139	0.235162	0.17549	1.34003	0.180237	0.998893	Hgf
4955.78	0.0854183	0.0637441	1.34002	0.180239	0.998893	Pitpnm2
419.509	-0.177851	0.132738	-1.33987	0.180288	0.998893	Slc25a14
900.99	0.132195	0.0988001	1.338	0.180896	0.998893	Fndc3b
325.381	-0.186483	0.139426	-1.33751	0.181057	0.998893	Tbc1d12
927.543	-0.121055	0.0905562	-1.33679	0.18129	0.998893	Usp4
266.856	-0.21002	0.157221	-1.33583	0.181605	0.998893	Sft2d2
263.85	0.194841	0.145924	1.33522	0.181805	0.998893	Rfesd
422.207	-0.162864	0.12199	-1.33506	0.181856	0.998893	Gba2
238.289	-0.220357	0.16506	-1.33501	0.181874	0.998893	Vav2
9923.74	-0.0665675	0.0498674	-1.33489	0.181912	0.998893	Slc25a4
306.341	0.196643	0.147325	1.33476	0.181956	0.998893	Asxl3
236.513	-0.2078	0.155706	-1.33457	0.182018	0.998893	Zfp983
193.135	0.231528	0.173571	1.33391	0.182234	0.998893	Abhd14b
464.652	0.154191	0.115598	1.33385	0.182253	0.998893	Rgs11
149.223	0.263737	0.197761	1.33362	0.18233	0.998893	Ankrd16
369.525	-0.168152	0.12609	-1.33359	0.182339	0.998893	Triqk
269.151	-0.220919	0.165702	-1.33324	0.182455	0.998893	Gpr137c
1307.45	-0.110683	0.0830268	-1.3331	0.182499	0.998893	Snx1
281.49	-0.21616	0.162237	-1.33237	0.182738	0.998893	Fndc5
716.379	-0.138513	0.103978	-1.33214	0.182815	0.998893	Gpx4
190.928	0.247246	0.185695	1.33147	0.183036	0.998893	Dnmbp
2640.07	0.0905892	0.0680453	1.33131	0.183088	0.998893	Marf1
184.9	-0.237434	0.178434	-1.33066	0.183302	0.998893	Slc19a2
491.94	0.16757	0.125938	1.33058	0.183328	0.998893	Kmt2b
504.121	0.146363	0.110013	1.33042	0.183379	0.998893	Morc3
3759.14	-0.0793964	0.05968	-1.33037	0.183397	0.998893	Ensa
147.241	0.26492	0.199258	1.32953	0.183673	0.998893	Pnp
142.519	-0.366003	0.275424	-1.32887	0.18389	0.998893	Whamm
1902.49	0.0904646	0.0680989	1.32843	0.184036	0.998893	Vkorc1l1
526.101	-0.157495	0.118573	-1.32825	0.184096	0.998893	Lzts3
2101.36	-0.106045	0.0798553	-1.32796	0.184192	0.998893	Capn1
2367.24	-0.0876752	0.0660306	-1.3278	0.184245	0.998893	Rab18
1007.64	0.11372	0.0856517	1.3277	0.184276	0.998893	Sec24b
522.837	-0.147268	0.11093	-1.32758	0.184317	0.998893	Mrpl20
751.881	-0.124269	0.0936177	-1.3274	0.184375	0.998893	Elovl4
900.346	0.176108	0.132685	1.32726	0.184423	0.998893	Scn3a
392.796	-0.178753	0.134701	-1.32703	0.184498	0.998893	Tm2d2
1762.24	-0.115221	0.0868347	-1.3269	0.184541	0.998893	Tuba1b
192.953	-0.255428	0.192511	-1.32682	0.184567	0.998893	Nmb
178.898	0.236222	0.178231	1.32536	0.185051	0.998893	Pdss2
1739.22	-0.100305	0.0756992	-1.32505	0.185154	0.998893	Ube2n
126.002	0.271174	0.204674	1.3249	0.185203	0.998893	Ncapd2
183.97	-0.247115	0.18659	-1.32437	0.185379	0.998893	Tbx2
125.967	-0.305993	0.231062	-1.32429	0.185407	0.998893	Kdm2b
2071.99	0.108117	0.0816579	1.32403	0.185494	0.998893	Wwp1
695.988	0.1556	0.117602	1.3231	0.185801	0.998893	Pdxk
641.623	0.142363	0.107604	1.32302	0.185827	0.998893	Usp6nl
493.624	0.149137	0.112738	1.32286	0.18588	0.998893	Trim66
233.214	-0.231505	0.175036	-1.32261	0.185964	0.998893	Slc1a5
756.006	-0.134443	0.101683	-1.32218	0.186108	0.998893	Atic
3101.59	-0.0788565	0.0596763	-1.3214	0.186367	0.998893	Got1
559.445	-0.16972	0.128447	-1.32133	0.186392	0.998893	Aup1
611.542	-0.134948	0.102164	-1.32089	0.186536	0.998893	Rras
596.701	0.142935	0.10822	1.32078	0.186574	0.998893	Dixdc1
473.817	0.156311	0.118389	1.32031	0.186731	0.998893	Omg
562.821	0.138527	0.104937	1.32009	0.186805	0.998893	Fam192a
311.023	-0.191156	0.144805	-1.32009	0.186805	0.998893	Sall2
2581.07	0.0905207	0.0685761	1.32	0.186834	0.998893	Neto2
566.493	0.161554	0.122414	1.31973	0.186924	0.998893	Prkd1
655.374	0.135257	0.102502	1.31956	0.186983	0.998893	Npc1
1683.15	-0.0985597	0.074696	-1.31948	0.18701	0.998893	Ccng1
362.885	-0.218124	0.165324	-1.31938	0.187043	0.998893	Gfm2
1148.96	0.106338	0.0806148	1.31909	0.18714	0.998893	Cdr2
1080.31	-0.111365	0.0844372	-1.31891	0.1872	0.998893	Eif3e
225.101	-0.209418	0.158783	-1.3189	0.187203	0.998893	Nsmce1
114.359	0.289325	0.219394	1.31874	0.187255	0.998893	Gm43268
92.2604	-0.396741	0.300849	-1.31874	0.187256	0.998893	Zfp759
2299.85	0.10524	0.0798722	1.31761	0.187634	0.998893	Plce1
141.536	0.265184	0.201321	1.31722	0.187765	0.998893	Cep41
315.545	0.210203	0.159591	1.31714	0.187792	0.998893	Kcnc3
161.298	-0.308362	0.234127	-1.31707	0.187814	0.998893	Dbh
91.2712	0.380793	0.289184	1.31679	0.18791	0.998893	Tmem198
1049.47	-0.10699	0.081269	-1.3165	0.188007	0.998893	Ogfrl1
461.736	-0.160811	0.122219	-1.31576	0.188254	0.998893	Bud31
1483.97	0.0967298	0.0735263	1.31558	0.188314	0.998893	Gatad2b
1202.38	-0.137476	0.104509	-1.31545	0.18836	0.998893	Eif3d
1106.85	0.119512	0.0908585	1.31536	0.188388	0.998893	Ddi2
1997.22	-0.107031	0.081394	-1.31497	0.18852	0.998893	Lrsam1
696.036	-0.143602	0.109238	-1.31457	0.188654	0.998893	Mdfic
2113.72	0.0943049	0.0717526	1.31431	0.188743	0.998893	Mtus1
1718.97	-0.0904463	0.0688228	-1.31419	0.188782	0.998893	Nipsnap1
517.128	-0.154317	0.117434	-1.31408	0.188818	0.998893	Brd7
375.857	0.178077	0.135536	1.31387	0.188889	0.998893	Adgra3
585.999	-0.153879	0.117122	-1.31383	0.188902	0.998893	Ext2
212.829	0.25388	0.193284	1.31351	0.189012	0.998893	Coq9
313.051	-0.192166	0.146325	-1.31328	0.189088	0.998893	Pgam1
170.582	0.247184	0.188259	1.313	0.189184	0.998893	Ranbp17
488.213	-0.187608	0.142931	-1.31257	0.189327	0.998893	Ppp2r3c
383.739	-0.221604	0.168852	-1.31241	0.18938	0.998893	Tstd2
1707.15	0.0983463	0.0749397	1.31234	0.189406	0.998893	Dstyk
563.408	0.148547	0.113254	1.31163	0.189646	0.998893	Vezf1
1678.59	-0.0974088	0.0742838	-1.31131	0.189754	0.998893	Evl
552.606	0.140764	0.107352	1.31123	0.189779	0.998893	Zswim6
350.972	0.192801	0.147059	1.31104	0.189844	0.998893	Lrrcc1
692.324	-0.164084	0.125349	-1.30902	0.190529	0.998893	Rbm17
218.706	-0.243983	0.186393	-1.30897	0.190543	0.998893	Zfand2b
10120.6	0.0692864	0.0529339	1.30892	0.19056	0.998893	Slc36a1
100.186	0.340791	0.260412	1.30866	0.190649	0.998893	Clrn2
436.332	0.155484	0.118823	1.30854	0.190691	0.998893	Foxj2
367.394	-0.187092	0.142983	-1.30849	0.190709	0.998893	Rgs10
405.136	0.174868	0.133697	1.30794	0.190895	0.998893	Bms1
262.535	0.215438	0.164764	1.30756	0.191024	0.998893	Zfp866
4689.05	-0.0991318	0.0758268	-1.30735	0.191095	0.998893	Ptms
425.354	-0.18265	0.139734	-1.30713	0.191169	0.998893	Hccs
96.9279	-0.308986	0.236421	-1.30693	0.191237	0.998893	Lrrk1
358.626	-0.192307	0.147165	-1.30674	0.1913	0.998893	2310011J03Rik
4924.13	0.0865996	0.0662933	1.30631	0.191447	0.998893	Trpv1
191.213	-0.230983	0.176845	-1.30613	0.191507	0.998893	Ccpg1
787.262	0.124089	0.0950142	1.30601	0.19155	0.998893	Tmem104
1078.42	-0.109801	0.084105	-1.30552	0.191716	0.998893	Atp6v1f
528.559	-0.14396	0.110385	-1.30417	0.192176	0.998893	Slc30a5
209.274	-0.216085	0.16569	-1.30415	0.192183	0.998893	Fam114a1
1214.9	-0.103405	0.0793143	-1.30374	0.192322	0.998893	Tapbp
164.631	0.261241	0.200496	1.30297	0.192585	0.998893	Cep162
114.378	-0.326277	0.250428	-1.30287	0.192617	0.998893	Rsad2
5177.68	0.0693336	0.053242	1.30223	0.192836	0.998893	Ebf1
404.06	0.168365	0.129309	1.30204	0.192903	0.998893	Hnrnph3
400.76	0.161467	0.124018	1.30197	0.192928	0.998893	Sh3bp5
1087.1	0.131147	0.100754	1.30166	0.193033	0.998893	Slc7a2
507.581	0.163956	0.125967	1.30158	0.193061	0.998893	Prpf39
1710.86	-0.0918564	0.0705855	-1.30135	0.193139	0.998893	Srsf6
177.886	0.242391	0.186262	1.30134	0.193141	0.998893	Cfap300
869.887	0.127983	0.098352	1.30128	0.193164	0.998893	Arhgap26.1
574.394	0.143149	0.110038	1.30091	0.193289	0.998893	Hivep3
411.775	0.172157	0.132432	1.29997	0.193612	0.998893	Fbrs
91.4551	0.319746	0.246126	1.29911	0.193905	0.998893	Zfp677
865.18	-0.122529	0.0943211	-1.29906	0.193924	0.998893	Tmub2
8054.57	0.0728021	0.0560439	1.29902	0.193937	0.998893	Ddah1
118.039	-0.29302	0.225588	-1.29892	0.193972	0.998893	E2f2
209.717	0.247686	0.190712	1.29875	0.19403	0.998893	Cnpy2
105.473	-0.311338	0.239745	-1.29862	0.194074	0.998893	Fbxo36
769.043	0.131376	0.101195	1.29824	0.194205	0.998893	Smg7
714.733	-0.133313	0.102701	-1.29807	0.194265	0.998893	Lap3
1065.31	-0.11573	0.0891676	-1.29789	0.194326	0.998893	Nedd8
189.798	-0.227844	0.175679	-1.29693	0.194655	0.998893	Dcbld1
163.877	0.281784	0.217289	1.29682	0.194693	0.998893	Ebf4
2037.89	0.107324	0.0827688	1.29667	0.194746	0.998893	Tmem184c
885.855	0.144979	0.111819	1.29655	0.194785	0.998893	Trpm3
22346.1	-0.086898	0.0670382	-1.29625	0.194891	0.998893	Syt4
1157.78	-0.115012	0.0887342	-1.29614	0.194926	0.998893	Stoml1
117.235	0.280448	0.216449	1.29568	0.195087	0.998893	Gm7818
241.51	-0.205875	0.158987	-1.29492	0.195347	0.998893	Rpl3
9382.26	-0.0729848	0.0563772	-1.29458	0.195465	0.998893	Sqstm1
2155.99	0.0837864	0.0647486	1.29403	0.195656	0.998893	Ubap2
1763.93	0.0906689	0.0700787	1.29382	0.195729	0.998893	Fam89a
117.233	0.291519	0.225475	1.29291	0.196042	0.998893	Zfp850
1555.06	0.0934424	0.0722794	1.29279	0.196082	0.998893	Zc3h7b
148.348	-0.298098	0.230658	-1.29238	0.196225	0.998893	Sostdc1
1329.2	-0.107404	0.0831145	-1.29224	0.196275	0.998893	Pou4f1
577.904	-0.194114	0.150237	-1.29206	0.196338	0.998893	Cpne6
157.015	-0.24802	0.191971	-1.29196	0.19637	0.998893	Wdr46
495.261	0.142272	0.110133	1.29182	0.196421	0.998893	2310061I04Rik
644.649	-0.148097	0.114655	-1.29168	0.196467	0.998893	Polr3g
280.462	-0.201417	0.156075	-1.29051	0.196873	0.998893	Txndc11
304.939	-0.218125	0.169035	-1.29042	0.196906	0.998893	Rnf144a
257.979	0.189275	0.146705	1.29017	0.196991	0.998893	Syngap1
1484.85	0.0956275	0.0741236	1.29011	0.197013	0.998893	Setd5
1206.06	0.140122	0.108616	1.29007	0.197026	0.998893	Unc13c
124.163	0.289874	0.224732	1.28986	0.197099	0.998893	Fam161b
112.41	-0.295385	0.229048	-1.28962	0.197183	0.998893	Zfp511
849.133	-0.125912	0.0976577	-1.28932	0.197286	0.998893	Svop
771.915	-0.126408	0.0980598	-1.28909	0.197365	0.998893	Dnajc11
643.211	-0.134997	0.104757	-1.28866	0.197516	0.998893	Rpe
2839.2	-0.083375	0.0647063	-1.28851	0.197567	0.998893	Atxn7l3b
990.461	-0.126084	0.0978559	-1.28847	0.197583	0.998893	Vps28
1328.43	-0.108056	0.0838651	-1.28845	0.197588	0.998893	Cog1
206.232	0.214628	0.166595	1.28832	0.197633	0.998893	Mettl2
407.169	-0.218406	0.169607	-1.28772	0.197844	0.998893	Pcdh11x
172.246	0.261028	0.202717	1.28764	0.19787	0.998893	Incenp
1087.84	-0.104674	0.081318	-1.28721	0.198021	0.998893	Rpl22
4656.13	0.0724304	0.0562742	1.2871	0.19806	0.998893	Atp1b3
2114.11	0.106782	0.083021	1.2862	0.198373	0.998893	Ktn1
1792.55	0.105201	0.081794	1.28617	0.198384	0.998893	Dhx36
246.33	-0.225194	0.175094	-1.28613	0.198396	0.998893	Mrpl1
185.633	0.225924	0.17567	1.28608	0.198417	0.998893	Lmnb2
1170.75	-0.108213	0.0841493	-1.28596	0.198456	0.998893	Arhgdig
486.424	0.16002	0.124481	1.2855	0.198618	0.998893	Sema3e
12978.8	0.0742563	0.0577667	1.28545	0.198635	0.998893	Stxbp1
338.934	-0.193225	0.150366	-1.28504	0.19878	0.998893	Rpl39
337.603	0.185707	0.144525	1.28495	0.198808	0.998893	Ppil4
1431.21	-0.101798	0.0792491	-1.28454	0.198955	0.998893	Lrrc49
117.982	0.35642	0.2775	1.28439	0.199004	0.998893	Dgat2
249.568	-0.20199	0.157285	-1.28423	0.199061	0.998893	Caly
179.571	-0.229145	0.178431	-1.28423	0.199063	0.998893	Toe1
199.538	0.226858	0.176923	1.28224	0.199758	0.998893	Ss18l2
1406.02	-0.107555	0.0839053	-1.28187	0.19989	0.998893	Ankrd27
2618.74	-0.098782	0.0770694	-1.28173	0.199938	0.998893	Cct3
1013.92	-0.151373	0.118109	-1.28164	0.19997	0.998893	Hist1h1c
1447.32	-0.108696	0.0848198	-1.28149	0.200022	0.998893	Psmd6
2638.25	0.0886075	0.0691718	1.28098	0.200202	0.998893	Cep170b
485.396	0.147127	0.114877	1.28073	0.200288	0.998893	Irf2bp2
1713.43	0.0901351	0.070384	1.28062	0.200328	0.998893	Ubr1
271.352	0.188425	0.14717	1.28032	0.200433	0.998893	Ippk
2207.76	0.108423	0.0847264	1.27968	0.200657	0.998893	Reps2
2295.8	-0.0833607	0.0651433	-1.27965	0.200668	0.998893	Atf4
1098.15	-0.103557	0.0809527	-1.27923	0.200814	0.998893	Hexb
953.546	-0.125639	0.0982391	-1.27891	0.20093	0.998893	Lonp1
276.699	0.195246	0.152852	1.27735	0.201478	0.998893	Zmym6
2204.3	-0.111403	0.0872349	-1.27705	0.201585	0.998893	Sparc
2782.44	0.0883189	0.0691626	1.27697	0.201611	0.998893	9330182L06Rik
1788.92	-0.0935669	0.0732756	-1.27692	0.201631	0.998893	Psmb7
2522.07	0.0862842	0.067594	1.27651	0.201777	0.998893	Usp33
107.079	0.335043	0.262584	1.27594	0.201975	0.998893	Rnpepl1
1024.52	-0.109946	0.0861708	-1.27591	0.201989	0.998893	Eif2b5
183.498	-0.2424	0.190005	-1.27575	0.202043	0.998893	Gltp
5572.06	-0.0728201	0.0571155	-1.27496	0.202323	0.998893	Ppp2ca
1140.69	-0.125284	0.0982905	-1.27463	0.20244	0.998893	Lgals3bp
178.802	0.232011	0.18208	1.27423	0.202583	0.998893	Zcchc4
212.51	-0.227947	0.178894	-1.2742	0.202592	0.998893	Sqor
1542.97	-0.0986341	0.0774097	-1.27418	0.202599	0.998893	Slc25a1
154.084	0.255922	0.200994	1.27328	0.202918	0.998893	Fastkd3
281.747	-0.199672	0.156866	-1.27289	0.203058	0.998893	Gatc
215.114	0.215489	0.169347	1.27247	0.203205	0.998893	Usp54
204.888	0.22367	0.175798	1.27231	0.203262	0.998893	Zfp617
3101.52	0.0864429	0.067957	1.27202	0.203365	0.998893	Ralgapb
387.356	-0.164538	0.129413	-1.27142	0.20358	0.998893	Ndufa12
484.785	-0.169208	0.133135	-1.27095	0.203746	0.998893	Tmem41b
166.809	0.287586	0.226303	1.2708	0.2038	0.998893	Sgf29
364.045	0.171418	0.134905	1.27066	0.203851	0.998893	Tmem255b
5919.94	0.069357	0.0545863	1.27059	0.203873	0.998893	Il6st
846.244	0.125346	0.0986552	1.27055	0.20389	0.998893	Rab11b
1248.16	0.136177	0.1072	1.27031	0.203974	0.998893	R3hdm1
1758.82	-0.102509	0.0806977	-1.27029	0.203982	0.998893	Pfn1
918.944	0.116306	0.0915861	1.26991	0.204116	0.998893	Manf
100.854	-0.328843	0.259089	-1.26923	0.204359	0.998893	Mr1
111.295	0.283282	0.223213	1.26911	0.204401	0.998893	E430024I08Rik
659.645	-0.130403	0.102754	-1.26907	0.204415	0.998893	Srcin1
143.86	-0.276007	0.217521	-1.26888	0.204484	0.998893	Chp2
888.877	0.110642	0.0872156	1.2686	0.204583	0.998893	Ap3m1
2177.32	-0.0850235	0.0670428	-1.2682	0.204728	0.998893	Tpd52
96.4008	-0.409736	0.323138	-1.26799	0.2048	0.998893	Gnpnat1
1664.01	0.105767	0.0834242	1.26782	0.204861	0.998893	Fbxl16
6995.88	0.0644844	0.0508623	1.26782	0.204861	0.998893	Atrnl1
102.185	0.299147	0.235989	1.26763	0.20493	0.998893	Srcap
260.297	0.202589	0.159834	1.2675	0.204977	0.998893	Ina
336.919	0.178217	0.140635	1.26723	0.205073	0.998893	Sdad1
1265.64	0.0979759	0.0773835	1.26611	0.205474	0.998893	R3hdm2
204.464	0.264467	0.208907	1.26595	0.205529	0.998893	Ano4
1182.23	-0.104142	0.0823112	-1.26522	0.205792	0.998893	Atp6v1g1
627.718	0.146272	0.115626	1.26504	0.205856	0.998893	Tyro3
183.897	-0.224686	0.177637	-1.26486	0.205923	0.998893	Selenos
417.753	0.16123	0.127483	1.26472	0.20597	0.998893	Mdm2
164.81	0.246572	0.194985	1.26457	0.206026	0.998893	Mttp
1277.74	0.124943	0.0988205	1.26434	0.206108	0.998893	Kcnk2
2489.56	0.078456	0.0620603	1.26419	0.206162	0.998893	Hcfc1
983.602	0.12378	0.0979523	1.26368	0.206346	0.998893	Suz12
355.351	-0.164098	0.12988	-1.26345	0.206426	0.998893	Lrrc40
108.064	0.307704	0.243797	1.26213	0.206902	0.998893	Pcdhgc4
8222.79	-0.0619422	0.0491058	-1.2614	0.207164	0.998893	Eif4g1
1025.17	-0.114439	0.0907644	-1.26083	0.207369	0.998893	Rcn2
118.198	0.297889	0.236274	1.26078	0.207389	0.998893	Zbtb39
1066.66	0.102032	0.0809428	1.26055	0.207472	0.998893	Exoc1
1430.37	-0.0954808	0.0757506	-1.26046	0.207503	0.998893	Swi5
100.421	-0.311433	0.247113	-1.26028	0.207567	0.998893	Impdh2
375.83	-0.174771	0.138727	-1.25982	0.207734	0.998893	Mpv17l
98.1136	0.320533	0.254526	1.25933	0.207911	0.998893	Cyp39a1
1434.79	-0.0951867	0.0756085	-1.25894	0.208051	0.998893	Fbxo9
686.063	0.129241	0.102674	1.25875	0.208121	0.998893	Bcas2
989.908	0.151994	0.120793	1.2583	0.208282	0.998893	Galnt9
2658.19	-0.0868509	0.0690442	-1.2579	0.208427	0.998893	Flii
3362.58	0.0898234	0.071416	1.25775	0.208483	0.998893	Pdzd8
840.098	-0.130343	0.103645	-1.25759	0.20854	0.998893	Maob
271.198	0.213369	0.169681	1.25747	0.208585	0.998893	Cdh13
[truncated: 53,336 more rows]

## Sheet: OVA-FPM vs naive. All DEGs
baseMean	log2FoldChange	lfcSE	stat	z	padj	gene
461.157	-1.02232	0.155403	-6.57848	4.75274259861372e-11	NA	Hspa1a
6012.25	0.346551	0.0687959	5.03738	4.71957604229184e-07	0.000154734	Pclo
1482.84	-0.437422	0.0868702	-5.03535	4.76984904719277e-07	0.000154734	Dnajb1
2314.86	0.414303	0.0835751	4.95725	7.14961699876397e-07	0.000210849	Chrnb3
4336.04	0.411696	0.0845474	4.86941	1.11932155514079e-06	0.00030259	4932438A13Rik
1350.96	0.443331	0.0920087	4.81836	1.44742525125115e-06	0.000361188	Kmt2d
7543.32	0.301708	0.0628654	4.79927	1.59247553319234e-06	0.000368999	Arfgef3
1555.72	-0.476652	0.100718	-4.73254	2.21723158620101e-06	0.000479513	Ide
1791.14	0.392238	0.0848252	4.62408	3.76270761979934e-06	0.000726112	Scpep1
5509.46	0.301465	0.0652274	4.62175	3.80514754862644e-06	0.000726112	Macf1
1340.31	0.423189	0.0923211	4.58388	4.56426060419483e-06	0.000822581	Oprm1
2665.3	-0.407679	0.0911088	-4.47465	7.65383185606384e-06	0.00126821	Laptm4a
3678.28	0.324581	0.0726117	4.47009	7.8187970570512e-06	0.00126821	Bsn
2766.72	-0.313107	0.0705014	-4.44114	8.94828491698333e-06	0.0013823	Hint1
127875	0.239567	0.0543276	4.40967	1.03530569622155e-05	0.00152661	Map1b
2777.24	0.351963	0.0807569	4.3583	1.31077461322223e-05	0.00184876	Psd3
1280.2	0.398959	0.0921576	4.32909	1.49723679087196e-05	0.00202377	Mdn1
6999.58	0.318155	0.0749469	4.24507	2.18521654458036e-05	0.00283141	Apc
10183.8	0.246495	0.0581822	4.2366	2.2693177407789e-05	0.00283141	Lifr
2302.11	0.320148	0.0761367	4.20491	2.61184673794861e-05	0.00306451	Kmt2a
5219.89	0.274904	0.0654214	4.20205	2.64508062997847e-05	0.00306451	Hmbox1
3171.2	0.31516	0.0753423	4.18304	2.8763208498169e-05	0.00321751	Zbtb20
2222.44	0.413818	0.0993394	4.1657	3.10402458173078e-05	0.00325272	Xist
4379.18	0.355196	0.0852733	4.16538	3.1083319957564e-05	0.00325272	Unc80
9504.81	0.307836	0.0746279	4.12494	3.70831442006607e-05	0.00370519	Usp9x
2585.56	0.34364	0.0833836	4.12119	3.76914859275854e-05	0.00370519	Cacna1c
4296.98	-0.285613	0.0696537	-4.10047	4.12319295435593e-05	0.00393401	Cox4i1
6208.12	0.275022	0.0682948	4.02697	5.64991699951688e-05	0.00522188	Hectd4
2721.58	0.305242	0.0759119	4.02101	5.79493261233507e-05	0.00522188	Nfat5
5542.73	0.255825	0.0642859	3.97948	6.906531035487e-05	0.00605535	Dmxl2
2921.56	0.288495	0.0727442	3.96589	7.3124099123694e-05	0.00624249	Vps13c
1692.67	0.331784	0.083793	3.95956	7.50875543773164e-05	0.00624574	Gan
12841.7	-0.245878	0.0625533	-3.9307	8.46974801978903e-05	0.00686897	Htr3a
3202.53	0.298597	0.0777026	3.84282	0.000121628	0.00962344	Birc6
3343.63	0.307531	0.0813844	3.77875	0.000157618	0.0117696	Tanc2
3683.22	0.266697	0.0707077	3.77183	0.000162055	0.0117696	Prrc2c
2710.41	0.280113	0.074284	3.77083	0.000162703	0.0117696	Usp31
1890.74	0.306221	0.0812263	3.76997	0.000163265	0.0117696	Tnrc6b
1286.99	0.351424	0.0936337	3.75317	0.00017461	0.0122483	Dock4
3863.06	0.24973	0.0666104	3.74912	0.000177456	0.0122483	Arhgef12
7257.2	-0.264066	0.071366	-3.70016	0.00021546	0.0145615	Crtac1
5859.67	0.312682	0.0847294	3.69036	0.000223934	0.0146523	Ank3
1707.83	0.305206	0.0827519	3.68821	0.000225836	0.0146523	Ctnnd2
1980.68	0.310945	0.0845307	3.67849	0.00023462	0.0149236	Tenm3
2650.93	0.283687	0.0774079	3.66483	0.000247503	0.0154404	Faxc
1210.91	0.412837	0.113712	3.63054	0.000282834	0.0173116	Lrp1
1098.33	0.362817	0.101017	3.59165	0.000328591	0.0197398	Ppp1r9a
1636.81	0.347328	0.0968789	3.58518	0.000336849	0.0198328	Atrx
1773.83	0.284816	0.0795379	3.58088	0.00034244	0.0198328	Numa1
1636.53	0.331995	0.0928317	3.57631	0.00034848	0.0198328	Ash1l
4071.89	0.242536	0.0682963	3.55124	0.000383425	0.0214454	Hs6st1
3090.57	-0.256939	0.0726873	-3.53485	0.000408007	0.0220852	Atp5c1
9150.9	0.246262	0.0696943	3.53346	0.000410164	0.0220852	Huwe1
1336.76	0.340872	0.0965595	3.53017	0.000415289	0.0220852	Kmt2c
3276.02	0.301094	0.0862911	3.48929	0.00048431	0.0253403	Abca5
3076.19	0.335278	0.0962609	3.48302	0.000495798	0.0255297	Cysltr2
1103.3	0.335625	0.0968402	3.46576	0.000528735	0.0267339	Peak1
4051.69	0.296154	0.0855379	3.46226	0.000535666	0.0267339	Ncam2
1658.87	0.317175	0.0922083	3.43977	0.000582212	0.0286166	Nbeal1
5671.21	0.230077	0.0677211	3.39741	0.000680257	0.0329366	Wdfy3
3879.67	0.30891	0.0917315	3.36754	0.000758411	0.0353612	Dgki
1772.55	0.346153	0.102896	3.3641	0.00076794	0.0353612	Smg1
3393.03	0.235188	0.0699282	3.36328	0.000770229	0.0353612	Lhfpl4
5274.67	0.223285	0.0664152	3.36195	0.000773936	0.0353612	Nacc2
3008.62	0.283653	0.0849059	3.34079	0.000835405	0.0371771	Abca8a
2855.56	-0.252595	0.0756183	-3.34039	0.000836599	0.0371771	Uqcrh
4068.04	0.268017	0.0803788	3.33442	0.000854768	0.0374712	Usp34
1298.5	0.321334	0.0970005	3.3127	0.000923991	0.0399657	Tenm2
1148.1	-0.316227	0.0957106	-3.30399	0.000953181	0.0406819	Chchd2
5740.8	0.216286	0.0655563	3.29925	0.000969452	0.0406819	Atp11a
3697.81	0.272639	0.0826999	3.29673	0.000978171	0.0406819	Kcna2
1522.58	0.327322	0.0994343	3.29184	0.000995339	0.0408719	Cep350
4455.18	-0.224919	0.0688351	-3.2675	0.00108501	0.043997	Lgals1
3373.77	0.252606	0.0776382	3.25363	0.00113939	0.0456319	Hectd1
3049.32	0.241387	0.0744224	3.24347	0.00118084	0.0464995	Fryl
5975.29	0.205601	0.063431	3.24133	0.00118972	0.0464995	Wnk1
2056.18	0.252787	0.0787353	3.2106	0.00132459	0.0511544	Pcnx
3231.36	-0.235287	0.073429	-3.20428	0.001354	0.0516751	Cox6b1
2754.1	0.241575	0.0756272	3.19429	0.00140177	0.0521207	Utrn
1086.48	0.360349	0.112862	3.19282	0.00140891	0.0521207	Slc7a2
6518.75	0.234529	0.0735024	3.19077	0.00141896	0.0521207	Lnpep
1561.18	0.368137	0.115456	3.18854	0.00142994	0.0521207	Fnbp1l
10859.1	0.254965	0.0802017	3.17905	0.00147757	0.0532583	Plec
1475.8	0.28647	0.0906475	3.16026	0.00157627	0.0561915	Arid1b
2524.73	0.253699	0.0804558	3.15327	0.00161454	0.05693	Nsd1
7534.06	0.207594	0.0660419	3.14337	0.00167014	0.0582572	Scn7a
2339.43	0.252932	0.0808532	3.12829	0.00175824	0.0602405	Plce1
2079.39	0.283387	0.0906167	3.12731	0.00176413	0.0602405	Miat
4397.69	0.23732	0.0759926	3.12294	0.00179057	0.0605063	Nav1
10040	0.182452	0.0586362	3.1116	0.00186078	0.0622305	Tmod2
4426.72	0.213007	0.0686387	3.10331	0.00191368	0.0622852	Sema5a
3526.65	0.238674	0.07692	3.10288	0.00191644	0.0622852	Nf1
2460.91	0.23478	0.0756784	3.10233	0.00192001	0.0622852	Cbl
1282.66	-0.278905	0.0905058	-3.08162	0.00205877	0.0657531	Arhgdig
5074.45	0.237758	0.077185	3.08037	0.00206745	0.0657531	Lrrc8b
1036.4	0.31642	0.102891	3.0753	0.00210287	0.0662303	Zbtb38
23602.1	0.192506	0.0626988	3.07034	0.00213816	0.0666943	Sv2c
14963.5	-0.17677	0.0576897	-3.06415	0.0021829	0.0673612	Ndfip1
1623.19	0.287488	0.0938992	3.06167	0.00220108	0.0673612	Tulp4
12926.9	0.213026	0.0697073	3.05601	0.00224304	0.0680039	Scn9a
1188.14	0.348697	0.114251	3.05202	0.0022731	0.068277	Rsf1
3734.21	0.214958	0.0705014	3.049	0.00229608	0.0683348	Atp2b1
4275.53	-0.210497	0.0692142	-3.04124	0.00235604	0.0694817	Cct7
29610	0.171147	0.0564204	3.03342	0.00241796	0.0706653	Kif1b
2543.32	0.31038	0.102721	3.02158	0.00251457	0.0728326	Fzd3
2523.79	0.231008	0.0765646	3.01717	0.00255145	0.0732468	Hcfc1
6683.93	0.202723	0.0675721	3.0001	0.00269888	0.0767996	Akap11
7265.71	0.236081	0.0787621	2.99739	0.00272302	0.076813	Srrm2
1186.39	0.304843	0.102565	2.9722	0.00295674	0.0822355	Csmd1
1416.01	-0.252786	0.0850776	-2.97124	0.00296595	0.0822355	Ndufb10
3119.18	0.246468	0.0830296	2.96844	0.0029932	0.0822876	Ranbp2
11676.7	0.251461	0.0849958	2.95851	0.00309133	0.0835801	Map2
4952.26	0.201946	0.0682602	2.95847	0.00309174	0.0835801	Ablim1
2173.72	-0.359156	0.121626	-2.95296	0.00314742	0.0839202	Eno1
16928.7	0.217489	0.0736723	2.95211	0.00315606	0.0839202	Myo5a
2220.23	0.269881	0.0917738	2.94072	0.00327451	0.086362	Foxn3
29119.2	0.168082	0.0573624	2.93018	0.00338767	0.0883774	Sptbn1
2194.32	0.30732	0.105029	2.92604	0.00343305	0.0883774	Akap9
1161.94	0.319319	0.109273	2.9222	0.00347571	0.0883774	Olfm3
2322.69	-0.22907	0.0783902	-2.92218	0.00347592	0.0883774	Tmsb10
2174.43	0.246157	0.0842665	2.92117	0.00348715	0.0883774	Ano6
1168.54	-0.279564	0.0960088	-2.91185	0.00359293	0.0891111	Rps4x
3471.54	0.203799	0.0700018	2.91133	0.0035989	0.0891111	Fry
2259.49	0.221119	0.0760336	2.90818	0.00363542	0.0891111	Myt1l
1648.13	-0.244116	0.0839625	-2.90744	0.00364394	0.0891111	Prdx5
13018.3	0.196736	0.0676851	2.90663	0.00365344	0.0891111	Ccser2
3218.13	0.24283	0.0836507	2.9029	0.00369721	0.0895057	Htt
2008.19	-0.267671	0.0923673	-2.8979	0.00375668	0.0902717	Rps3
2658.71	0.224927	0.0779499	2.88554	0.00390747	0.0923745	Lrrc58
2272.39	0.226182	0.0784714	2.88235	0.00394723	0.0923745	Susd6
1203.09	0.276414	0.0959175	2.88179	0.00395425	0.0923745	Helz
2615.07	-0.206486	0.0716595	-2.88148	0.00395809	0.0923745	Cmpk1
1293.53	0.264677	0.0923459	2.86615	0.00415501	0.0957821	Trim25
2251.43	0.220333	0.0768908	2.86553	0.00416315	0.0957821	Chd6
1546.1	0.254072	0.0888872	2.85837	0.00425826	0.0968063	Hivep2
2384.13	0.29428	0.102978	2.85769	0.00426736	0.0968063	Pcm1
1835.34	0.25104	0.0880068	2.85251	0.00433758	0.0976279	Lyst
7163.6	0.20842	0.0731145	2.85059	0.00436376	0.0976279	Herc2
1741.1	0.234611	0.0824819	2.84439	0.00444968	0.0981984	Sema6d
2646.11	-0.228267	0.080267	-2.84384	0.0044573	0.0981984	Hdac11
4029.26	0.246682	0.0868459	2.84045	0.00450493	0.0981984	Taok1
1527.16	0.263867	0.0929085	2.84007	0.00451035	0.0981984	Nebl
2689.07	0.223369	0.0789062	2.83082	0.00464286	0.100007	Cep170b
4901.44	0.188843	0.0667541	2.82893	0.00467033	0.100007	Ubr5
1940	0.260053	0.0919607	2.82787	0.0046859	0.100007	Pura
1735.29	0.273402	0.096946	2.82015	0.00480018	0.101776	Rc3h2
5061.97	0.211752	0.0752488	2.81403	0.00489247	0.10306	Cntnap2
1663.33	0.228136	0.0811999	2.80956	0.00496093	0.103828	Ylpm1
1704.24	0.242935	0.0865583	2.8066	0.00500667	0.104113	Zfp804a
7169.56	0.169598	0.0606002	2.79864	0.00513177	0.106035	Atrnl1
10218.1	-0.21042	0.0754806	-2.78773	0.00530782	0.108978	Anxa5
1331.28	0.246341	0.0884581	2.78483	0.00535554	0.109002	Zfhx2
6864.57	0.217218	0.078136	2.78	0.00543595	0.109002	Ubr4
2098.62	0.242104	0.0870951	2.77976	0.00543986	0.109002	Bptf
4827.23	0.222916	0.0801984	2.77955	0.00544337	0.109002	Tns1
10768.8	0.187127	0.0674626	2.77379	0.00554077	0.110165	Peg3
5475.08	0.213101	0.0768943	2.77135	0.0055825	0.110165	Egr1
3967.75	0.197122	0.071179	2.76939	0.00561621	0.110165	Ttbk2
2403.81	-0.21839	0.0788936	-2.76817	0.00563727	0.110165	Actr10
1750.41	-0.229653	0.0832698	-2.75794	0.00581672	0.112991	Ndufb8
1591.69	0.267859	0.0973656	2.75106	0.00594029	0.114704	Nktr
1908.67	0.216775	0.0789138	2.74698	0.00601464	0.114778	Rere
4423.98	0.239621	0.0872312	2.74697	0.00601489	0.114778	Prkg1
2473.82	0.248409	0.0907056	2.73863	0.00616959	0.116749	Golgb1
1996.38	-0.221614	0.0809539	-2.73754	0.00619012	0.116749	Nudt3
19432.7	-0.183221	0.0671091	-2.73019	0.00632978	0.118693	Tppp3
1493.43	0.270135	0.0990487	2.72729	0.00638568	0.118822	Cnksr2
4310.68	0.215281	0.0790148	2.72457	0.00643852	0.118822	Vps13d
2080.57	0.210438	0.077249	2.72416	0.00644658	0.118822	Vps13b
2628.52	0.258846	0.0951451	2.72054	0.00651749	0.119451	Gpr161
19128.1	0.160188	0.059027	2.71381	0.00665136	0.121219	Cltc
2118.51	-0.20831	0.0771347	-2.7006	0.00692138	0.124928	Sdhb
2067.17	-0.24629	0.0912548	-2.69892	0.00695642	0.124928	Cox7a2
2854.26	0.217817	0.0807251	2.69826	0.0069704	0.124928	Apc2
1112.59	0.318321	0.118365	2.68931	0.0071599	0.127619	Zfhx3
20331.1	-0.161504	0.0601101	-2.6868	0.00721401	0.127881	Atp5b
2344.94	-0.203369	0.0759707	-2.67694	0.00742978	0.130786	Hnrnpc
1593	0.223509	0.0835345	2.67565	0.00745853	0.130786	Brd4
1521.29	0.223461	0.0836349	2.67186	0.00754312	0.130895	Zfp318
1340.91	0.26506	0.0992079	2.67176	0.00754541	0.130895	Chd9
4498.49	0.185936	0.069686	2.6682	0.00762593	0.131588	Atp8a2
2837.96	0.248563	0.0933607	2.6624	0.00775864	0.13317	Rps6ka3
1347.63	0.25327	0.0957259	2.64578	0.00815025	0.139155	Slc8a1
9657.47	0.19305	0.0731085	2.64059	0.0082762	0.140565	Agtpbp1
3229.73	0.204755	0.0776826	2.63579	0.00839413	0.141399	Ncor1
2344.75	0.219368	0.08325	2.63505	0.00841243	0.141399	Mpdz
10769.2	-0.190845	0.0726714	-2.62614	0.00863599	0.143834	Syp
8832.16	-0.156901	0.059791	-2.62415	0.00868646	0.143834	Mdh1
1820.83	0.210941	0.080389	2.624	0.00869032	0.143834	Erc1
1158.22	0.320572	0.122281	2.62159	0.00875198	0.143992	Mga
2465	-0.19521	0.0745029	-2.62017	0.00878864	0.143992	Pja1
5282.52	-0.185995	0.0710828	-2.6166	0.00888108	0.144775	Atp1b3
3390.2	-0.213788	0.0817606	-2.6148	0.00892785	0.14481	Rab15
2254.01	-0.201312	0.0770661	-2.6122	0.00899624	0.144815	Actr3
1312.03	0.258544	0.0990062	2.61139	0.00901747	0.144815	Plch1
10383	0.196458	0.0753686	2.60664	0.00914366	0.146101	Enah
1395.56	0.246863	0.0948222	2.60343	0.00922957	0.146101	Sptb
10412.6	0.155004	0.059561	2.60245	0.00925614	0.146101	Dnm3
5788.38	0.194464	0.0747464	2.60165	0.00927766	0.146101	Susd2
26547.6	-0.175452	0.0674912	-2.59962	0.00933264	0.146256	mt-Rnr2
7312.67	0.238498	0.0919854	2.59278	0.00952025	0.148479	Kcnq3
4279.53	0.179227	0.0691773	2.59083	0.00957435	0.148609	Cacna1b
1609.68	0.279874	0.108638	2.57621	0.00998889	0.154305	Bbx
1787.06	0.217581	0.085084	2.55726	0.0105502	0.161497	Tmem245
2266.61	0.198683	0.077716	2.55653	0.0105723	0.161497	Zfp106
2169.31	0.213147	0.0834074	2.55549	0.0106039	0.161497	Rgs9
2306.76	0.189916	0.074395	2.55281	0.0106859	0.161987	Ago2
35085.1	0.224819	0.0881736	2.54973	0.0107806	0.162661	Dync1h1
2327.12	0.249925	0.0981535	2.54627	0.0108881	0.163391	Bod1l
3469.2	-0.194232	0.0763209	-2.54494	0.0109297	0.163391	Stip1
1782.9	-0.202948	0.0798695	-2.541	0.0110536	0.164486	Tomm34
1761.55	-0.209819	0.0827034	-2.537	0.0111805	0.165615	Sdhd
3554.52	0.248889	0.0982213	2.53396	0.0112782	0.166073	Rgs17
1898.21	0.217258	0.085776	2.53285	0.0113138	0.166073	Iqsec3
8330.16	0.151652	0.060009	2.52716	0.011499	0.16803	Prrc2b
1401	-0.215508	0.0855029	-2.52048	0.0117195	0.168699	Tmem59l
2585.41	0.183311	0.0727564	2.51952	0.0117515	0.168699	Trio
3694.12	0.208704	0.0828476	2.51913	0.0117644	0.168699	Zeb2
7895.17	-0.17407	0.0691286	-2.51806	0.0118005	0.168699	Ass1
1889.98	-0.221109	0.0878139	-2.51793	0.0118048	0.168699	Eef1b2
2399.61	0.190414	0.0757019	2.51532	0.0118924	0.169207	Cacna1e
1037.48	-0.237957	0.094735	-2.51181	0.0120112	0.17015	Xbp1
1619.23	0.206133	0.0821777	2.50838	0.0121287	0.170594	Samd12
2259.79	0.18744	0.0747738	2.50676	0.0121843	0.170594	Kcnip4
4199.47	0.196932	0.0786864	2.50275	0.0123232	0.170594	Arfgef1
4710.54	0.218523	0.0873168	2.50264	0.012327	0.170594	Myo9a
1347.01	0.255995	0.10242	2.49945	0.0124385	0.170594	Scn8a
2485.11	0.209676	0.0838894	2.49943	0.0124392	0.170594	Nrcam
4184.97	0.166775	0.0667408	2.49884	0.0124599	0.170594	Adgrl1
1060.33	-0.245947	0.0984281	-2.49875	0.0124633	0.170594	Ppib
1504.86	0.223317	0.0894487	2.49659	0.0125393	0.170913	Setx
1072.76	-0.250887	0.100728	-2.49074	0.0127479	0.17303	Msrb2
1779.18	0.236119	0.0949053	2.48794	0.0128485	0.173669	Timp3
20442.5	0.202637	0.0816767	2.48097	0.0131026	0.176368	Pgm2l1
1971.52	0.213921	0.0863392	2.47768	0.013224	0.177267	Arid1a
1147.28	-0.227545	0.0919878	-2.47364	0.0133744	0.178079	Nsg1
3566.78	0.169441	0.0685134	2.47311	0.0133944	0.178079	Clasp1
1682.3	0.239453	0.0971436	2.46494	0.0137036	0.180693	Zfp871
2050.44	0.252819	0.102619	2.46368	0.0137519	0.180693	Vps13a
1281.99	-0.241896	0.0981912	-2.46352	0.013758	0.180693	Atp5h
1053.95	0.235502	0.0957781	2.45883	0.0139392	0.182333	Hivep1
2832.58	0.203391	0.0829489	2.45201	0.0142062	0.18458	Raph1
1418.13	0.232783	0.0949537	2.45154	0.0142247	0.18458	Slmap
1857.73	0.223879	0.0917862	2.43914	0.0147224	0.190276	Dock10
4823.95	-0.161026	0.0661707	-2.43349	0.0149539	0.192501	Mtch1
2146.8	-0.209916	0.0865581	-2.42514	0.0153025	0.195176	Hdgf
1808.33	-0.198828	0.0820433	-2.42346	0.0153736	0.195176	Tmx2
1792.97	0.250275	0.103293	2.42295	0.0153949	0.195176	Dzip3
2792.45	-0.178462	0.0736599	-2.42278	0.0154023	0.195176	Cct3
4750.42	0.182471	0.0754126	2.41963	0.0155361	0.196106	Cdc42bpa
2341.9	0.214526	0.0889065	2.41294	0.0158243	0.1984	Rc3h1
1139.23	0.225505	0.0934783	2.41238	0.0158488	0.1984	Ddi2
23744.2	-0.154332	0.0640436	-2.40979	0.0159618	0.1984	Sncg
2056.85	0.202721	0.0841245	2.40977	0.0159625	0.1984	Iqsec1
1347.79	0.240054	0.0997736	2.40599	0.0161288	0.199702	Csrnp3
1923.76	0.195618	0.0814168	2.40268	0.0162755	0.200752	Cacnb4
3356.01	0.177974	0.0742131	2.39814	0.0164786	0.202487	Kcnb1
1368.99	-0.223646	0.0933485	-2.39582	0.016583	0.203001	Rack1
1476.51	0.205356	0.0858546	2.3919	0.0167614	0.203327	Hipk1
1322.4	0.211911	0.0886251	2.39109	0.0167982	0.203327	Fbxl20
4475.76	0.165217	0.0691647	2.38875	0.0169057	0.203327	Synj1
1656.78	0.233193	0.0976239	2.38869	0.0169085	0.203327	Akap13
3121.92	-0.174531	0.0730801	-2.38821	0.0169306	0.203327	Atpif1
2393.83	-0.204649	0.085734	-2.38702	0.0169857	0.203327	Ndufa4
1148.49	0.26092	0.10943	2.38437	0.0171086	0.204045	Phc3
4093.54	0.161164	0.0677527	2.37871	0.0173734	0.206445	Usp32
2895.76	-0.196239	0.0825715	-2.3766	0.0174732	0.206873	Lxn
2512.05	0.176416	0.0743089	2.37408	0.0175926	0.207528	Sorbs1
5699.26	-0.16013	0.0674954	-2.37245	0.0176703	0.20769	Fdft1
7711.51	-0.168985	0.0713238	-2.36926	0.0178235	0.208109	Akr1a1
1552.6	0.249668	0.105388	2.36904	0.0178342	0.208109	Unc5d
2084.06	0.214616	0.0906676	2.36707	0.0179296	0.208472	Gpm6b
1131.07	0.253726	0.107334	2.36388	0.0180846	0.209523	Epha5
3366.17	-0.160476	0.0681532	-2.35464	0.0185404	0.21404	Vdac2
1481.74	0.223282	0.0949903	2.35058	0.0187443	0.215084	Ccdc186
2273.8	-0.195457	0.0831661	-2.3502	0.0187635	0.215084	Cox5a
3081.25	-0.201497	0.0862846	-2.33526	0.0195296	0.222314	Idh3a
13896.5	0.132634	0.0567968	2.33523	0.0195313	0.222314	Uhmk1
3436.57	0.176122	0.0756179	2.3291	0.0198537	0.225194	Uhrf1bp1l
23865.6	0.13043	0.0560535	2.32689	0.019971	0.225735	Akap12
3929.84	0.156742	0.0674233	2.32475	0.0200856	0.226242	Camsap2
2459.08	-0.174924	0.0753103	-2.3227	0.020195	0.226687	Atf4
1039.8	-0.224181	0.0966575	-2.31934	0.0203767	0.227938	Gdap1l1
3493.27	0.157178	0.067856	2.31634	0.0205398	0.22821	Cacna2d1
1312.15	0.239966	0.103598	2.3163	0.0205417	0.22821	Zmiz1
1135.12	-0.260057	0.112455	-2.31254	0.0207479	0.229714	Efcab6
1499.32	0.202074	0.0875306	2.30861	0.020965	0.230588	Stox2
2787.46	0.269065	0.116552	2.30854	0.020969	0.230588	Cntn1
1184.08	-0.25719	0.111559	-2.3054	0.021144	0.230603	Cd81
8349.81	0.156286	0.0678323	2.304	0.0212226	0.230603	Gsk3b
1062.36	-0.217069	0.0942406	-2.30335	0.021259	0.230603	Ano10
1222.75	-0.225087	0.0977396	-2.30293	0.021283	0.230603	Tbcb
2683.48	0.167633	0.0728155	2.30217	0.0213258	0.230603	45538
3629	0.193765	0.08429	2.29879	0.021517	0.23148	Cep170
2005.76	0.198569	0.0864046	2.29813	0.0215545	0.23148	Abi2
5863.87	-0.149937	0.0652764	-2.29696	0.021621	0.23148	Slc25a3
7009.2	0.169788	0.0739789	2.29509	0.0217281	0.231862	Chl1
1428.64	-0.22111	0.0966851	-2.28691	0.0222009	0.23613	Zcchc12
2521.52	-0.176476	0.0773771	-2.28073	0.0225644	0.239213	Tmem59
1247.2	0.233675	0.102585	2.27787	0.0227346	0.239364	Unc13c
1330.16	-0.210758	0.0925845	-2.27639	0.0228228	0.239364	Slc25a11
2275.48	-0.183872	0.0808334	-2.2747	0.022924	0.239364	H2-D1
26419.6	-0.166688	0.0732919	-2.2743	0.0229482	0.239364	Nefl
1840.36	-0.185487	0.0815722	-2.27389	0.0229724	0.239364	Psmb4
1187.93	0.218364	0.0960654	2.27308	0.0230214	0.239364	Nufip2
1562.32	0.206517	0.0909278	2.27122	0.0231336	0.239384	Lix1
1638.19	-0.202738	0.0893488	-2.26907	0.0232644	0.239384	Clic1
2526.56	-0.202115	0.0890833	-2.26884	0.0232783	0.239384	Cplx2
3144.8	-0.206067	0.0909138	-2.26662	0.0234136	0.239384	Ccni
2618.18	0.165223	0.0729056	2.26626	0.0234354	0.239384	Dock3
3429.47	0.185593	0.0819121	2.26576	0.0234661	0.239384	Phactr2
4693.01	0.158892	0.070313	2.25978	0.0238349	0.242384	Eif3a
1260.96	-0.220622	0.0977248	-2.25758	0.0239716	0.243012	Selenok
3805.41	0.165743	0.0735038	2.2549	0.0241399	0.243955	Mia3
1060.43	-0.21171	0.0945734	-2.23858	0.0251833	0.25371	Pfdn2
1950.51	0.187504	0.0838931	2.23504	0.025415	0.254894	Clcn5
16735.2	-0.186796	0.0836631	-2.23272	0.0255676	0.254894	Tuba1a
1508.25	0.22793	0.102115	2.23209	0.0256091	0.254894	Armcx4
1630.4	0.212793	0.0953564	2.23156	0.0256441	0.254894	Tnik
2675.97	-0.174706	0.0783152	-2.23081	0.0256936	0.254894	Clta
13271.3	-0.128111	0.0577324	-2.21905	0.0264836	0.261178	Calm2
3615.86	0.153207	0.0690948	2.21735	0.0265992	0.261178	Adam22
1292.18	0.223983	0.101054	2.21646	0.02666	0.261178	R3hdm1
1098.77	-0.214672	0.0968965	-2.21548	0.0267274	0.261178	Rcn2
3404.05	0.15188	0.0685775	2.21472	0.0267793	0.261178	Robo2
4677.61	0.155197	0.0700895	2.21427	0.0268101	0.261178	Plekhm3
6495.51	-0.156925	0.0709736	-2.21103	0.0270337	0.262567	Stmn3
11542.9	-0.207016	0.0937265	-2.20872	0.0271938	0.263333	Rgs4
1491.21	0.24179	0.109601	2.2061	0.0273773	0.264321	Trip11
7421.59	-0.159483	0.0723811	-2.20339	0.0275676	0.265369	Tubb2a
1133.14	0.207589	0.0943972	2.1991	0.0278706	0.267492	Jmy
2612.66	-0.170465	0.0775957	-2.19683	0.0280323	0.26825	Araf
5440.87	-0.13842	0.0630429	-2.19565	0.0281173	0.268272	Snrpn
1183.36	0.203826	0.0931524	2.18809	0.0286631	0.272183	Hook3
1047.06	0.210965	0.0964347	2.18765	0.028695	0.272183	Ccdc136
1924.36	0.171731	0.0788462	2.17804	0.0294027	0.278083	Klf13
1759.75	0.181978	0.0835986	2.1768	0.0294955	0.278149	Timeless
2163.92	0.174886	0.0804086	2.17497	0.0296323	0.278629	Nup93
14745.9	-0.12556	0.0577688	-2.17348	0.0297438	0.27887	Atp5a1
10016.3	-0.135231	0.0623157	-2.17009	0.0299997	0.280458	Ldha
1130.98	0.210819	0.0973191	2.16626	0.0302913	0.281702	Paqr9
2226.21	0.180297	0.0832372	2.16606	0.0303064	0.281702	Taf1
4107.56	-0.188396	0.0870575	-2.16404	0.0304616	0.282336	Fkbp4
1637.84	-0.200099	0.0928555	-2.15496	0.0311653	0.286817	Ap2s1
3082.36	-0.157129	0.0729193	-2.15483	0.031175	0.286817	Pcbp2
3527.04	-0.154327	0.0716342	-2.15438	0.0312103	0.286817	Cct6a
1141.34	-0.198893	0.0925921	-2.14806	0.031709	0.290576	Tspan31
2080.24	0.18386	0.0857768	2.14347	0.0320754	0.293106	Rasal2
1481.49	-0.180847	0.0844668	-2.14104	0.0322705	0.294061	Vps29
2390.9	0.176436	0.0825145	2.13825	0.0324965	0.294541	Osbpl8
1347.95	-0.194728	0.0910734	-2.13815	0.0325048	0.294541	Vdac3
7712.69	-0.143987	0.0675615	-2.13119	0.0330733	0.298857	Chrna3
1050.9	0.216147	0.101504	2.12944	0.0332176	0.299328	Sesn3
1823.93	0.213769	0.100499	2.12708	0.0334136	0.300259	Zfp445
28111.3	-0.128386	0.0604319	-2.12447	0.0336305	0.301374	Uchl1
2681.74	0.160613	0.0756681	2.1226	0.0337877	0.301949	Mib1
4399.15	0.151116	0.0712676	2.12041	0.0339717	0.302759	Ralgapa1
7507.15	-0.141648	0.0668746	-2.11812	0.0341653	0.30365	Pea15a
3302.09	-0.188205	0.0889577	-2.11567	0.0343732	0.304663	Fkbp8
2311.23	0.206993	0.0979293	2.1137	0.0345408	0.305315	Abca8b
3172.97	0.150815	0.0714253	2.1115	0.0347291	0.305604	Synrg
6165.36	0.147412	0.0698265	2.11112	0.034762	0.305604	Synm
2259.53	0.161954	0.0770362	2.10231	0.035526	0.311128	Mecp2
2739.79	0.155266	0.0739067	2.10083	0.0356555	0.311128	Marf1
1247.3	0.191494	0.0911795	2.10019	0.0357123	0.311128	Afdn
2985.64	0.159205	0.0758304	2.09949	0.035774	0.311128	Ube4b
1363.99	-0.193832	0.092474	-2.09607	0.0360756	0.312913	Tusc2
5212.57	0.142685	0.0681634	2.09328	0.0363245	0.314229	Ubr3
1781.47	0.170981	0.0817407	2.09174	0.0364614	0.314229	Cnot1
4499.74	-0.154331	0.0738198	-2.09064	0.0365605	0.314229	Bsg
2589.99	0.154911	0.074119	2.09003	0.0366148	0.314229	F2rl2
1725.45	-0.200255	0.095977	-2.08649	0.036934	0.31593	Itm2a
2503.14	-0.179903	0.0862563	-2.08568	0.0370078	0.31593	Asns
3566.49	0.143195	0.0687647	2.0824	0.0373063	0.316865	Ankrd17
5644.54	-0.156497	0.0751571	-2.08227	0.0373179	0.316865	Tpi1
1534.99	-0.260866	0.12534	-2.08126	0.0374104	0.316865	S100a6
1390.29	-0.183554	0.0882851	-2.07911	0.0376076	0.317706	Snx1
4006.6	0.13558	0.0652605	2.07752	0.0377536	0.318111	Chd5
3281.8	0.150198	0.072403	2.07447	0.0380359	0.319145	Pdpk1
7492.04	0.1474	0.0710682	2.07407	0.0380731	0.319145	Spag9
1443.65	-0.17676	0.0853521	-2.07095	0.0383638	0.320053	Eif3l
2772.98	-0.158071	0.0763339	-2.07079	0.0383787	0.320053	Nsg2
2876.52	0.167166	0.0808	2.06888	0.038557	0.320715	Luzp2
3505.42	-0.152859	0.0739619	-2.06673	0.0387599	0.321579	Arf1
2736.65	0.147795	0.0717916	2.05867	0.0395255	0.326906	Inpp4a
1864.35	-0.16254	0.0790388	-2.05646	0.0397381	0.326906	Rbx1
2617.6	0.161321	0.0784608	2.05608	0.0397752	0.326906	Fmn1
1871.74	0.168048	0.0817446	2.05577	0.0398052	0.326906	Klf9
9307.76	0.141137	0.0687408	2.05317	0.040056	0.327703	Slc7a14
3220.59	0.147619	0.0719332	2.05218	0.0401526	0.327703	Ralgapb
1725.64	-0.167129	0.0814616	-2.05163	0.0402052	0.327703	Psmd7
13803.7	-0.131292	0.0640586	-2.04957	0.0404068	0.328521	Ncald
2789.55	-0.161961	0.0793988	-2.03984	0.0413662	0.335173	Sod1
1067.24	-0.22968	0.112633	-2.03918	0.0414317	0.335173	AI593442
1180.6	0.195657	0.0960322	2.03741	0.0416093	0.335756	Foxo3
2907.18	0.147557	0.0724681	2.03616	0.0417343	0.335756	Dnajb14
2045.3	0.182702	0.089764	2.03536	0.0418143	0.335756	Ncoa2
3398.33	0.142948	0.0702803	2.03397	0.041955	0.336054	Rasgrp1
1500.26	0.188966	0.0931163	2.02936	0.0424219	0.338957	Ago3
8221.54	0.11976	0.0590786	2.02712	0.0426497	0.33994	Rbfox2
1863.06	0.171529	0.0848281	2.02208	0.043168	0.343228	Apbb2
2298.37	-0.161428	0.0798954	-2.02049	0.0433327	0.343695	Psmd14
4698.32	-0.14465	0.0716545	-2.01871	0.043517	0.344315	Rit2
1297.69	-0.177385	0.0879922	-2.01592	0.0438081	0.345775	Fuca2
2502.89	-0.145171	0.0721057	-2.01331	0.0440823	0.34638	Txn1
4830.33	0.153568	0.076282	2.01316	0.0440983	0.34638	Cyp1b1
1343.6	-0.181358	0.0903609	-2.00704	0.0447454	0.3499	Brk1
1238.78	-0.187401	0.0934349	-2.00569	0.0448893	0.3499	Sbds
1072.8	0.24381	0.121623	2.00464	0.0450012	0.3499	Setd2
4416.85	0.137073	0.0683922	2.00421	0.0450471	0.3499	Prrc2a
3087.2	0.167306	0.0834921	2.00385	0.0450858	0.3499	Sos1
2684.24	-0.171287	0.0856591	-1.99963	0.0455399	0.352581	Itm2c
1749.48	-0.162304	0.0812441	-1.99773	0.0457457	0.353331	Arpc3
1530.11	-0.172052	0.0861963	-1.99605	0.0459284	0.353899	Tspyl2
3891.73	-0.159788	0.0802356	-1.99149	0.0464272	0.356412	Ap3b2
2471.72	-0.1484	0.0746534	-1.98785	0.0468287	0.356412	Psmb1
2890.43	0.18941	0.0952845	1.98783	0.0468302	0.356412	C530008M17Rik
1805.79	0.163027	0.0820565	1.98676	0.0469485	0.356412	C77080
1102.14	-0.191896	0.0966075	-1.98634	0.0469952	0.356412	Auh
1230.88	0.192364	0.096887	1.98545	0.0470948	0.356412	Srrm4
7664.67	0.126996	0.0639694	1.98526	0.0471151	0.356412	Bmpr2
4233.3	0.144737	0.0729116	1.9851	0.0471335	0.356412	Ecpas
1982.51	0.156822	0.0791178	1.98213	0.0474649	0.357602	Pcdhac2
1109.61	-0.182432	0.0920578	-1.98171	0.0475112	0.357602	Gabarapl2
3308.33	-0.18054	0.091162	-1.98043	0.0476553	0.357805	Ppp1r2
1768.53	-0.159443	0.0805469	-1.97951	0.0477589	0.357805	Paics
2041.53	0.178387	0.0902244	1.97715	0.0480249	0.358397	Golga4
1102.74	-0.19793	0.100124	-1.97685	0.0480588	0.358397	Eef1g
2652.34	0.155705	0.0788311	1.97517	0.048249	0.35899	Ppm1l
1586.67	0.172004	0.087148	1.9737	0.0484164	0.359357	Stxbp5
2259.6	0.157903	0.080063	1.97223	0.048583	0.359357	Dip2c
2522.76	0.149815	0.0759783	1.97182	0.0486307	0.359357	Dock7
4196.22	-0.187737	0.095279	-1.9704	0.0487931	0.359738	Lgmn
2203.19	-0.177758	0.0903057	-1.96841	0.0490214	0.359913	Ubb
1931.49	0.170348	0.0866281	1.96643	0.049249	0.359913	Ncoa1
1632.19	0.166791	0.08484	1.96595	0.0493042	0.359913	Map4k4
1240.82	0.206341	0.104965	1.96581	0.0493205	0.359913	Dmxl1
1741.59	0.173019	0.08806	1.96479	0.0494383	0.359913	Pik3ca
3582.12	-0.141745	0.0721564	-1.96441	0.0494825	0.359913	Sf3b2
1626.37	-0.162457	0.0827692	-1.96278	0.0496721	0.360484	Uqcrfs1
1463.3	0.224498	0.114512	1.96047	0.0499412	0.361628	Ubc
1149.99	0.187154	0.0956172	1.95732	0.0503095	0.363333	Atp13a3
2653.86	-0.143607	0.0733981	-1.95655	0.0504007	0.363333	Scamp5
1601.55	-0.163875	0.083896	-1.95331	0.0507835	0.365281	Drg1
5811.59	0.119545	0.0613024	1.95008	0.0511667	0.366517	Mprip
1636.82	0.160681	0.0824024	1.94996	0.0511813	0.366517	Tle1
1430.17	0.189107	0.0971635	1.94628	0.051621	0.368852	Nlgn2
1672.34	-0.158547	0.0816147	-1.94262	0.0520616	0.370271	Npc2
1828.65	-0.168163	0.0866281	-1.94121	0.0522326	0.370271	Crhr2
2132.54	0.227015	0.117	1.9403	0.0523432	0.370271	Zfp638
1117.02	-0.200828	0.103532	-1.93977	0.0524072	0.370271	Uqcr10
2872.82	-0.143484	0.0739731	-1.93967	0.0524196	0.370271	Myl6
3528.96	-0.131514	0.0678264	-1.93897	0.0525046	0.370271	Syngr3
3381.46	0.144314	0.0744917	1.93732	0.0527067	0.370891	Dhx9
4034.07	-0.131433	0.0679237	-1.935	0.0529897	0.372075	Rab2a
8803.18	0.142671	0.0739236	1.92998	0.0536097	0.375615	Nrxn1
1584.58	0.160114	0.0832319	1.92371	0.0543913	0.379476	Nsd3
1377.91	0.189852	0.0986922	1.92368	0.0543947	0.379476	Secisbp2l
1669.15	-0.159877	0.0832684	-1.92002	0.054856	0.380824	Stard7
1321.79	0.197336	0.102858	1.91853	0.0550442	0.380824	Gpr158
14560.9	0.118586	0.061872	1.91663	0.0552849	0.380824	Ntrk2
1283.14	-0.168846	0.0881331	-1.91581	0.0553897	0.380824	Ralyl
1520.57	0.165071	0.0861827	1.91536	0.0554467	0.380824	Nr2c2
3051.5	-0.133715	0.0698252	-1.915	0.0554927	0.380824	Eid1
41500.2	-0.109017	0.056936	-1.91472	0.0555278	0.380824	Calm1
3465.11	0.152996	0.0799215	1.91433	0.055578	0.380824	Slk
2030.21	0.151989	0.0794169	1.91381	0.0556445	0.380824	Atrn
3168.92	0.134597	0.0704882	1.9095	0.0561976	0.3838	Ctnna1
2957.14	0.158181	0.0830701	1.90419	0.0568858	0.386355	Gabrb3
1540.45	-0.176086	0.0925168	-1.90329	0.0570031	0.386355	Ahsa1
1067.19	-0.183535	0.0964379	-1.90314	0.0570221	0.386355	Dnajc14
1379.14	0.170566	0.0896329	1.90294	0.0570482	0.386355	Dab2ip
2949.37	-0.152078	0.080007	-1.9008	0.0573278	0.387295	Psmc3
1867.17	-0.169354	0.0891312	-1.90006	0.0574257	0.387295	Atp6v0b
2996.69	-0.143501	0.0755906	-1.8984	0.0576431	0.387437	Snap47
1980.07	-0.152655	0.0804363	-1.89784	0.0577175	0.387437	Pdhb
8053.94	0.125935	0.0663801	1.89717	0.0578051	0.387437	Klf7
4693.56	0.1399	0.073795	1.89579	0.0579874	0.387858	Aff4
1124.48	-0.187597	0.0990068	-1.89479	0.05812	0.387945	Pfkl
4220.53	-0.138103	0.072985	-1.89221	0.0584627	0.389016	Capzb
2251.05	0.164307	0.0868634	1.89156	0.0585499	0.389016	Grin3a
8250.64	-0.1302	0.0688569	-1.89088	0.0586403	0.389016	Vdac1
2142.9	-0.164233	0.0868983	-1.88995	0.0587648	0.389047	Sars
16860.5	-0.113314	0.0600142	-1.88812	0.0590095	0.389871	Tmsb4x
1576.08	0.222139	0.117881	1.88442	0.0595075	0.392363	Plxna4
1462.82	-0.167921	0.089187	-1.88279	0.0597285	0.392593	Aldh2
1179.59	0.216717	0.115129	1.88238	0.0597845	0.392593	Zhx1
2557.74	0.176432	0.0938119	1.8807	0.0600123	0.392776	Frmpd4
1634.68	-0.172812	0.0919021	-1.88039	0.0600545	0.392776	Hs3st4
2497.11	0.161982	0.0862209	1.87869	0.0602866	0.393501	Vps4b
2559.57	0.161777	0.0861731	1.87735	0.0604707	0.393716	Pcdh17
2040.74	-0.159154	0.0848568	-1.87555	0.0607166	0.393716	Gde1
2878.77	0.154341	0.0822924	1.87552	0.0607207	0.393716	Ankrd52
1285.7	-0.180712	0.0963842	-1.87491	0.0608051	0.393716	Pgd
1546.24	-0.181116	0.0966719	-1.87351	0.0609978	0.393769	Psma7
1508.31	0.185762	0.0992508	1.87164	0.0612561	0.393769	Rapgef6
8940.05	0.163557	0.0873869	1.87164	0.0612563	0.393769	Fasn
1198.38	-0.168274	0.089929	-1.87119	0.0613189	0.393769	Ssrp1
1261.07	-0.188125	0.100577	-1.87046	0.0614202	0.393769	Tmeff1
1384.03	0.161742	0.086757	1.86431	0.0622788	0.398486	Tmem131
2251.31	-0.158787	0.0852724	-1.86211	0.0625871	0.398946	Selenof
7015.01	-0.118499	0.0637138	-1.85987	0.062904	0.398946	Hspb8
3694.51	0.135578	0.072904	1.85968	0.0629303	0.398946	Vcl
1575.34	0.174369	0.0937728	1.85948	0.0629593	0.398946	Igsf3
5904.72	-0.134549	0.0723614	-1.85941	0.062969	0.398946	Tubb4b
2514.85	-0.137529	0.0739975	-1.85857	0.0630886	0.398946	Qdpr
4485.88	-0.122776	0.0661815	-1.85515	0.0635752	0.401241	Dstn
3032.11	-0.132586	0.0715267	-1.85366	0.0637875	0.401772	Prdx2
1729.73	-0.186722	0.100777	-1.85283	0.0639071	0.401772	Slc5a7
1775.79	-0.162342	0.0876674	-1.85179	0.0640561	0.401931	Emc10
1136.02	-0.174261	0.0942144	-1.84963	0.0643676	0.403105	Ifngr2
12851.2	0.131521	0.0711401	1.84875	0.0644934	0.403115	Rbms3
2097.83	0.140123	0.0759102	1.8459	0.0649061	0.404914	Pacs2
1499.37	0.17539	0.0951791	1.84274	0.0653676	0.406856	Tbl1xr1
1302.41	-0.175859	0.0954692	-1.84205	0.0654682	0.406856	Sybu
1873.46	0.174496	0.0949825	1.83714	0.0661892	0.409445	Oip5os1
2698.12	-0.136519	0.0743115	-1.83712	0.0661926	0.409445	Trim35
3972.45	-0.124078	0.067596	-1.83559	0.0664186	0.409445	Ensa
1240.89	-0.169367	0.092271	-1.83554	0.0664254	0.409445	Cisd1
1046.66	-0.187761	0.102326	-1.83493	0.0665159	0.409445	BC004004
3055.56	-0.131593	0.0717883	-1.83307	0.0667918	0.4102	Atp6v1h
2905.61	0.143209	0.078294	1.82912	0.0673814	0.4102	Slc38a2
1547.88	-0.16176	0.0884841	-1.82813	0.0675303	0.4102	Bcap31
2297.32	-0.138319	0.0756681	-1.82797	0.0675534	0.4102	Sema4d
5170.73	-0.140685	0.0769753	-1.82767	0.0675993	0.4102	Ctsd
1722.99	-0.161871	0.0885896	-1.8272	0.0676699	0.4102	Rps15
1261.79	0.163348	0.0893998	1.82716	0.067675	0.4102	Atp2b3
1818.16	0.157364	0.0861611	1.82639	0.0677914	0.4102	Megf9
9940.01	-0.125114	0.0685233	-1.82587	0.0678705	0.4102	Sqstm1
2586.13	0.179766	0.0984667	1.82565	0.067903	0.4102	Unc5c
3496.99	0.145836	0.0799235	1.82469	0.0680472	0.410215	Pdzd8
1361.56	0.166762	0.0914284	1.82396	0.0681584	0.410215	Mvb12b
1747.32	0.168306	0.0923727	1.82203	0.0684506	0.410337	Senp6
2587.15	-0.140876	0.0773505	-1.82127	0.0685654	0.410337	Fabp5
1507.34	-0.157424	0.0864869	-1.82021	0.068727	0.410337	Eif1b
2526.39	0.138842	0.0762939	1.81983	0.068785	0.410337	Dop1b
1125.44	-0.19279	0.105949	-1.81966	0.0688112	0.410337	Pcbd1
1725.57	0.152575	0.0839529	1.81739	0.0691578	0.411648	Depdc5
1683.13	0.174158	0.0959008	1.81602	0.0693677	0.412141	Daam1
2671.4	-0.147759	0.0814811	-1.81341	0.0697685	0.413428	Ndufa10
1312.36	0.181391	0.100088	1.81233	0.0699358	0.413428	Ehbp1
1262.66	0.168137	0.0928316	1.8112	0.0701093	0.413428	Rnf44
1260.91	0.183721	0.101447	1.81102	0.0701382	0.413428	Med13
4598.36	-0.116408	0.0642971	-1.81048	0.0702217	0.413428	Mdh2
24054.1	-0.109689	0.0607764	-1.80479	0.071107	0.41681	Scg2
1513.13	0.19225	0.106544	1.80442	0.071165	0.41681	Dennd4a
3016.48	-0.147292	0.0817047	-1.80274	0.0714295	0.41681	Uqcrc1
3701.38	0.124004	0.0688214	1.80182	0.0715735	0.41681	Cic
2238.25	0.137151	0.0761252	1.80165	0.0716003	0.41681	Pbrm1
1589.07	-0.159932	0.0887772	-1.8015	0.0716247	0.41681	Psmd4
1126.45	-0.16688	0.0926838	-1.80053	0.0717763	0.41681	Opa3
1217.75	0.173541	0.096399	1.80023	0.0718239	0.41681	Zkscan1
1808.26	0.153307	0.0852029	1.79932	0.0719679	0.4169	Chd8
1291.55	-0.16228	0.0902389	-1.79834	0.0721239	0.416978	Gpat4
2103.42	0.157073	0.0874007	1.79716	0.0723096	0.416978	Rlim
2313.57	-0.142958	0.0796311	-1.79525	0.0726142	0.416978	Prdx1
1374.79	-0.170297	0.094934	-1.79385	0.0728377	0.416978	Adprh
1638.94	0.1767	0.0985229	1.79349	0.0728945	0.416978	Stat2
2902.64	0.132088	0.0736663	1.79306	0.072964	0.416978	9330182L06Rik
2701.91	0.166187	0.0927183	1.79239	0.0730709	0.416978	Tpr
3371.77	-0.145414	0.0811372	-1.79219	0.0731019	0.416978	Eif5a
9512.6	0.107997	0.060281	1.79156	0.0732031	0.416978	Gnal
1984.69	0.196136	0.109502	1.79116	0.0732669	0.416978	Rock2
1197.1	0.169709	0.0947928	1.79031	0.0734037	0.417026	Tenm4
1841.6	0.158204	0.0884518	1.78859	0.0736804	0.417653	Nsd2
3128.18	-0.140628	0.0786673	-1.78763	0.0738365	0.417653	Bub3
2318.44	-0.14907	0.0834084	-1.78723	0.0739004	0.417653	Hacd3
1552.75	-0.148844	0.0834097	-1.7845	0.074343	0.419354	Ifi27
2057.92	-0.137651	0.0771855	-1.78338	0.0745237	0.419354	Ndfip2
2044.09	0.137786	0.0773052	1.78237	0.0746897	0.419354	Zbtb7a
1181.58	0.165283	0.0928151	1.78077	0.0749497	0.419354	Mfhas1
1622.68	-0.181093	0.101738	-1.77999	0.0750768	0.419354	Eepd1
2768.84	0.196652	0.110501	1.77964	0.0751355	0.419354	Dcdc2a
1124.67	0.167396	0.0940838	1.77922	0.075203	0.419354	Ro60
2137.08	0.152353	0.0856396	1.779	0.0752402	0.419354	Slc12a2
4525.92	0.116887	0.0657317	1.77824	0.0753648	0.419354	Cd47
1644.71	0.161932	0.0911908	1.77575	0.0757748	0.420841	Braf
1657.84	0.190595	0.107375	1.77504	0.0758914	0.420841	Trrap
11870	-0.112887	0.0636799	-1.77273	0.0762733	0.421505	Prkar1b
2178.67	-0.139216	0.0786072	-1.77104	0.0765544	0.421505	Rfk
14353.7	0.108918	0.0615171	1.77053	0.0766388	0.421505	Kif5c
2185.77	0.174272	0.098461	1.76996	0.0767335	0.421505	Hdac9
1293.53	0.159599	0.0901842	1.7697	0.0767778	0.421505	Vwa8
3299.84	0.131114	0.0741047	1.76931	0.0768428	0.421505	Nfasc
2074.5	-0.170239	0.0962432	-1.76884	0.0769207	0.421505	Rpl8
1104.82	0.174889	0.0990148	1.76629	0.0773472	0.421876	Ppip5k2
24220.6	-0.103159	0.0584151	-1.76597	0.0774012	0.421876	Vat1l
1063.12	0.173541	0.0982806	1.76577	0.077434	0.421876	Dcun1d4
1760.3	-0.142471	0.0807541	-1.76426	0.0776889	0.421876	Psmd12
2223.2	0.165922	0.0940645	1.76391	0.0777464	0.421876	Myh14
1051.09	0.172131	0.0976732	1.76232	0.0780157	0.421876	Prkci
10468.4	-0.10235	0.0580788	-1.76226	0.0780259	0.421876	Slc25a4
1727.77	-0.15086	0.0856069	-1.76224	0.0780289	0.421876	Vps26b
6287.7	-0.134732	0.0765711	-1.75957	0.0784809	0.423614	Fos
2278.4	-0.147679	0.0839906	-1.75828	0.0786993	0.424087	Ndufs2
4327.74	-0.116684	0.0664735	-1.75535	0.0791994	0.426074	Epdr1
49584.6	-0.109288	0.0623609	-1.75251	0.0796853	0.427979	Hsp90ab1
7752.57	0.11429	0.0652767	1.75086	0.0799703	0.428799	Camta1
7826.32	-0.139043	0.0796505	-1.74567	0.0808684	0.432899	Anxa6
2240.26	0.130024	0.0745741	1.74355	0.0812373	0.434158	Agap1
2035.62	0.155892	0.089473	1.74233	0.08145	0.434578	Mef2a
8967.88	-0.121175	0.0696434	-1.73994	0.0818701	0.435822	Plekhb2
1159.4	0.167134	0.0960829	1.73947	0.0819517	0.435822	Bcl2
3722.98	0.117479	0.0676404	1.73682	0.0824185	0.437587	Fam168a
1404.62	-0.181921	0.105071	-1.73141	0.0833784	0.44091	Atp5j
2194.42	-0.138208	0.0798804	-1.73018	0.0835977	0.44091	Atp5d
1765.08	0.149207	0.0862679	1.72958	0.0837061	0.44091	Gfra1
1861.63	-0.147135	0.0850744	-1.72949	0.0837221	0.44091	Ndufv2
1565.48	0.157692	0.0911789	1.72948	0.083724	0.44091	1810013L24Rik
3342.63	0.125749	0.0728207	1.72683	0.0841986	0.442186	Cbx5
19127.9	-0.122063	0.070723	-1.72594	0.0843588	0.442186	Tubb5
6370.05	-0.107716	0.0624133	-1.72585	0.0843752	0.442186	Gnl3l
3611.68	0.122038	0.0707688	1.72446	0.0846252	0.442781	Ankrd11
1631.97	-0.15037	0.0872754	-1.72293	0.0849003	0.443412	Slc25a1
3824.4	-0.124672	0.0724106	-1.72174	0.0851168	0.443412	Atp5g3
2620.39	0.133051	0.0773018	1.72119	0.0852159	0.443412	Agfg1
1134.34	-0.164106	0.0954508	-1.71927	0.0855653	0.443412	Plpp1
9576.51	0.116675	0.0678673	1.71916	0.0855857	0.443412	Vwa5a
1330.84	-0.148389	0.0863153	-1.71915	0.0855862	0.443412	Park7
3633.73	0.129354	0.0752933	1.718	0.0857971	0.443412	Mfsd6
2380.8	0.131428	0.0765109	1.71777	0.0858394	0.443412	Arhgap21
7083.38	-0.128365	0.0747924	-1.71629	0.086109	0.444098	Hsph1
3293.37	-0.127946	0.0746109	-1.71485	0.0863735	0.444101	Rnf11
1062.49	-0.184191	0.107444	-1.7143	0.0864733	0.444101	Hist1h1c
3506.63	-0.140051	0.0817079	-1.71405	0.0865204	0.444101	Actr1b
21141.6	0.100604	0.0587286	1.71303	0.0867078	0.44436	Dpysl3
2077.27	-0.141309	0.0825794	-1.71119	0.0870456	0.44491	Cox6c
1717.83	0.161885	0.0946446	1.71046	0.0871816	0.44491	Atp11b
3233.22	0.119031	0.069706	1.70762	0.0877068	0.44491	Setd7
4436.62	0.113077	0.0662411	1.70705	0.0878133	0.44491	Scarb2
2090.2	0.141397	0.0828545	1.70657	0.0879026	0.44491	Hip1
3360.69	-0.18735	0.109784	-1.70654	0.0879081	0.44491	Eml1
2106.01	-0.14911	0.087407	-1.70593	0.0880211	0.44491	Lrpap1
2557.73	0.132652	0.0777619	1.70587	0.0880319	0.44491	Acsl1
2190.64	0.130154	0.0763044	1.70571	0.0880614	0.44491	Aatk
1099.63	-0.158704	0.0931236	-1.70424	0.0883371	0.44491	Dctn3
1872.27	0.135216	0.0793483	1.70409	0.088365	0.44491	Paqr8
3283.58	0.122897	0.0721657	1.70298	0.0885724	0.44491	Zdhhc17
2936.5	0.118952	0.0698549	1.70284	0.0885981	0.44491	Cmip
6220.02	0.114956	0.0676137	1.70018	0.0890963	0.446721	Dync1li2
1132.84	-0.208346	0.122694	-1.69809	0.0894915	0.44798	Drp2
2075.54	0.132008	0.0778251	1.69622	0.0898445	0.44798	Sel1l
1201.7	0.174613	0.102945	1.69618	0.0898525	0.44798	Nfib
1586.34	0.178919	0.105499	1.69593	0.0898999	0.44798	Arhgap5
1665.16	-0.138237	0.0816728	-1.69257	0.0905383	0.45047	Ywhaq
3580.69	0.127964	0.0756739	1.69099	0.0908394	0.451276	Dock11
1555.15	0.16557	0.0980034	1.68943	0.0911375	0.452064	Ptprz1
1671.83	0.139792	0.0827932	1.68845	0.0913246	0.452301	Exoc6b
1670.7	-0.139766	0.0829418	-1.68511	0.0919679	0.454792	Chmp5
1332.18	-0.146142	0.0867746	-1.68415	0.092152	0.455009	Dazap2
3352.15	-0.11424	0.0678657	-1.68333	0.092312	0.455107	Prkag2
2552.67	-0.12834	0.0763559	-1.68082	0.0927981	0.456809	Ndrg3
1352.67	-0.144214	0.085886	-1.67913	0.0931269	0.45758	Tsg101
2368.72	-0.128422	0.0765773	-1.67703	0.0935374	0.45758	Armcx2
1133.37	-0.159354	0.09504	-1.6767	0.0936011	0.45758	Ndufb6
1149.31	0.164222	0.0979608	1.67641	0.0936582	0.45758	Ermp1
4887.22	-0.12264	0.0731566	-1.6764	0.09366	0.45758	Apbb1
2597.35	-0.132437	0.0791116	-1.67406	0.0941195	0.457656	Me1
4879.2	-0.108211	0.0646731	-1.6732	0.0942872	0.457656	Rpl4
2267.38	0.127598	0.0762735	1.67289	0.0943481	0.457656	Tnk2
1032.6	-0.164041	0.0980684	-1.67272	0.0943819	0.457656	Fnta
8364.57	0.0985566	0.0589514	1.67183	0.0945584	0.457656	Akap6
4892.66	0.137082	0.0820031	1.67167	0.094589	0.457656	Ncl
3439.52	-0.116888	0.0699386	-1.6713	0.0946632	0.457656	Atl1
1698.76	0.165941	0.0993449	1.67035	0.0948493	0.457874	Snx13
1622.13	-0.16263	0.0974481	-1.66889	0.0951391	0.458108	Txndc17
6404.14	-0.104301	0.0625716	-1.6669	0.0955339	0.458108	Pfn2
5868.53	-0.104563	0.0627358	-1.66672	0.0955699	0.458108	Ppp2ca
2604.23	-0.137103	0.0822675	-1.66656	0.0956028	0.458108	Dlst
2517	0.139504	0.0837083	1.66655	0.0956039	0.458108	Sptbn2
1046.05	0.162488	0.0978565	1.66047	0.0968192	0.462348	Cplane1
1518.94	0.144456	0.0870194	1.66004	0.0969066	0.462348	Hsd17b7
2590.91	0.132424	0.0797741	1.65999	0.0969164	0.462348	Nalcn
1049.56	0.189115	0.11407	1.65788	0.0973415	0.462422	Golim4
2268.25	-0.125702	0.0758368	-1.65754	0.0974113	0.462422	Gnai1
1364.97	0.167125	0.100839	1.65734	0.0974516	0.462422	Plxna2
1530.91	-0.14479	0.087376	-1.65709	0.097502	0.462422	Vti1b
2594.55	-0.132494	0.0800537	-1.65507	0.0979104	0.463061	Ppp1ca
1827.96	0.140007	0.08463	1.65434	0.0980582	0.463061	Kdm2a
1064.81	0.176348	0.1066	1.6543	0.0980667	0.463061	Mllt6
1313.47	0.157866	0.0954967	1.65311	0.0983093	0.463061	Gcc2
2756.9	-0.119484	0.0723113	-1.65236	0.0984613	0.463061	Tspan3
2779.95	-0.118419	0.0716732	-1.6522	0.0984932	0.463061	Bex2
1961.8	0.14307	0.086693	1.65031	0.0988796	0.463988	Nrp2
3816.67	-0.177322	0.107478	-1.64984	0.0989764	0.463988	Nrn1
8092.92	0.117494	0.0712965	1.64797	0.0993595	0.465112	Kidins220
3457.03	0.131141	0.079735	1.64472	0.100028	0.467568	Oga
1348.6	0.153184	0.0931792	1.64397	0.100183	0.467616	D5Ertd579e
3123.02	0.133382	0.0812112	1.64241	0.100505	0.467686	Tro
1348.74	-0.160308	0.0976358	-1.64189	0.100612	0.467686	Kars
3094.61	-0.122647	0.0747024	-1.64181	0.10063	0.467686	Necap1
1884.75	0.135388	0.0826355	1.63838	0.101342	0.469864	Znfx1
1695.85	0.184045	0.112385	1.63763	0.1015	0.469864	Ccn1
1201.07	0.147028	0.0898157	1.637	0.101631	0.469864	Cdr2
1297.22	0.150377	0.0918744	1.63677	0.101678	0.469864	Appbp2
1542.97	-0.139397	0.0854543	-1.63125	0.102838	0.474549	Nudcd3
1577.81	0.156803	0.0962902	1.62844	0.103431	0.475974	Dock9
3421.29	-0.139608	0.0857409	-1.62825	0.103472	0.475974	Map1lc3a
1652.08	0.132697	0.081524	1.6277	0.103588	0.475974	Mtmr3
1065.14	-0.159129	0.097835	-1.62651	0.103842	0.47647	Ube2e1
3324.37	0.173858	0.106976	1.6252	0.104119	0.477067	Nek1
1192.8	-0.153434	0.0945002	-1.62364	0.104453	0.477921	Esd
16043.9	0.0889133	0.0547901	1.6228	0.104633	0.47804	L1cam
2129.06	0.145654	0.0897915	1.62214	0.104774	0.47804	Sbno1
35491.5	0.108584	0.0669989	1.62068	0.105087	0.478796	Spock2
1210.62	0.157957	0.097581	1.61873	0.105506	0.480032	Pcdh10
4863.98	0.122525	0.0758186	1.61603	0.106088	0.482002	Stard4
10210.4	-0.126563	0.0784477	-1.61334	0.106672	0.483976	Sult4a1
30017.3	0.104669	0.0649328	1.61195	0.106973	0.484346	Kif1a
1167.59	0.177818	0.110345	1.61148	0.107076	0.484346	Igip
1471.75	-0.142686	0.0885749	-1.6109	0.107201	0.484346	Gatad1
2130.54	-0.136226	0.0847015	-1.60831	0.107768	0.486028	Glrb
123749	0.0993824	0.0618116	1.60783	0.107873	0.486028	mt-Co1
1153.88	0.153029	0.095278	1.60613	0.108246	0.486951	Mapk1ip1l
2259.02	0.13709	0.0854206	1.60489	0.108519	0.486951	Hipk3
2017.29	0.125203	0.0780159	1.60484	0.108528	0.486951	Igf1r
1201.55	0.153379	0.0958996	1.59938	0.109737	0.491696	Atg2b
3964.04	0.104746	0.065539	1.59822	0.109995	0.492168	Wdr7
1118.96	-0.153421	0.0960828	-1.59676	0.110318	0.492938	BC031181
26269.9	-0.0948141	0.0594963	-1.59361	0.111022	0.495075	Reep5
1278.81	0.140112	0.0879402	1.59326	0.111102	0.495075	Gpatch8
1539.64	-0.142313	0.0895307	-1.58955	0.111937	0.498111	Rragb
5203.01	0.104082	0.0655718	1.58729	0.112447	0.499695	Pitpnm2
3287.62	0.138216	0.0871944	1.58515	0.112932	0.501165	Ralgps2
3346.65	-0.116769	0.0737489	-1.58332	0.113347	0.502321	Rab3d
2068.23	0.183623	0.116174	1.58059	0.113971	0.503573	Plp1
1515.98	0.149208	0.0944028	1.58055	0.113982	0.503573	Avl9
1485.67	0.151358	0.0957931	1.58005	0.114096	0.503573	Adam10
7926.71	-0.118228	0.0748734	-1.57904	0.114327	0.503907	Parva
2012.61	0.149764	0.0951304	1.5743	0.115419	0.507283	Smad9
1536.08	0.131304	0.083405	1.57429	0.115419	0.507283	Nf2
1878.77	-0.125075	0.0794794	-1.57367	0.115563	0.507283	Tsnax
1090.06	0.154256	0.0980645	1.573	0.115718	0.507283	Cep250
1805.96	0.131844	0.0838653	1.5721	0.115928	0.507519	Bcr
5145.79	0.111628	0.0711134	1.56971	0.116482	0.508063	Ckap5
2245.95	0.121628	0.0775139	1.56911	0.116623	0.508063	Hecw1
6612.53	0.0998987	0.0636729	1.56894	0.116663	0.508063	Glg1
1718.85	0.134328	0.0856212	1.56887	0.116679	0.508063	Kcnma1
7694.46	-0.101669	0.0648601	-1.56751	0.116995	0.508756	Acot7
2755.66	0.113411	0.0724184	1.56606	0.117335	0.509053	St8sia3
9865.27	-0.092495	0.0590691	-1.56588	0.117377	0.509053	Gabarapl1
1383.03	0.139178	0.0889328	1.56498	0.117588	0.509288	Xpot
2463.38	0.130768	0.0836844	1.56263	0.118139	0.510989	Itsn2
1825.49	-0.125936	0.0808219	-1.55819	0.119189	0.514846	Psma6
1823.91	-0.123204	0.079368	-1.55231	0.120588	0.518606	Ube2n
1157.25	-0.143801	0.0926395	-1.55226	0.1206	0.518606	Cers5
1161.81	-0.153885	0.09915	-1.55204	0.120653	0.518606	Hras
1333.3	-0.137989	0.0889192	-1.55185	0.120699	0.518606	Aamp
2522.85	-0.122468	0.0790026	-1.55017	0.1211	0.518777	Oat
3664.8	0.114856	0.0741139	1.54973	0.121207	0.518777	Lonrf2
1087.11	-0.150557	0.0971539	-1.54968	0.121218	0.518777	Ptges3
1090.04	-0.147328	0.0951531	-1.54833	0.121544	0.519287	Suclg1
1229.26	0.142865	0.0923407	1.54715	0.121828	0.519287	Emc1
1868.81	0.135202	0.0874125	1.54672	0.121932	0.519287	Pabpc1
4930.71	0.0994428	0.0643079	1.54635	0.122019	0.519287	Nfic
11763.1	-0.0891475	0.0576918	-1.54524	0.122289	0.519287	Rtn1
3891.92	-0.104733	0.0678023	-1.54468	0.122423	0.519287	Chmp3
4112.52	-0.105221	0.0681706	-1.5435	0.12271	0.519287	Steap3
1191.51	-0.144364	0.0935616	-1.54298	0.122835	0.519287	Spcs1
7234.3	0.0967038	0.0627479	1.54115	0.123281	0.519287	Gnaq
5058.8	0.118293	0.0767722	1.54083	0.123358	0.519287	Trip12
1715.68	0.142093	0.092255	1.54022	0.123506	0.519287	Pds5b
1329.69	-0.155555	0.101003	-1.5401	0.123536	0.519287	Cuedc2
11814.7	-0.0969537	0.0629688	-1.53971	0.123631	0.519287	Vamp2
2719.26	-0.114181	0.0741726	-1.53939	0.123708	0.519287	Arpc5
1700.55	-0.138337	0.0899381	-1.53814	0.124015	0.519287	Rps9
8019.67	-0.114277	0.0743348	-1.53733	0.124213	0.519287	Cfl1
1245.11	-0.14284	0.0929395	-1.53691	0.124314	0.519287	Atp6v1g1
1313.8	-0.141174	0.0918588	-1.53686	0.124328	0.519287	Serpinf1
1514.65	0.130857	0.085188	1.53609	0.124516	0.519287	Nras
2548.28	0.122704	0.0800062	1.53368	0.125109	0.519287	Rdx
1419.22	0.130814	0.0853019	1.53354	0.125143	0.519287	Tmem151b
9382.04	0.0999358	0.0651851	1.53311	0.125249	0.519287	Mbnl2
1289.06	-0.141411	0.0922617	-1.53272	0.125346	0.519287	Usp11
1526.23	0.12775	0.0833497	1.5327	0.12535	0.519287	Phkb
1322.67	-0.133451	0.0870726	-1.53264	0.125364	0.519287	Rpl32
21516.9	-0.0873339	0.0570178	-1.5317	0.125597	0.519287	Stmn2
2599.34	-0.118243	0.0772794	-1.53007	0.126	0.519287	Alg2
1073.42	-0.145912	0.0954116	-1.52929	0.126191	0.519287	Ptprr
1792.27	0.1243	0.0812882	1.52912	0.126234	0.519287	Ubr1
1570.95	-0.13114	0.0857691	-1.52899	0.126266	0.519287	B2m
1078.69	0.146332	0.0957928	1.52759	0.126613	0.519287	Cpsf6
1292.37	0.135028	0.0884316	1.52692	0.126781	0.519287	Prdm2
4078.15	0.115406	0.0755845	1.52685	0.126798	0.519287	Arfgef2
1800.98	-0.127048	0.0832355	-1.52636	0.126919	0.519287	Tmem179
4673.44	0.100729	0.0660001	1.5262	0.12696	0.519287	Asap1
10194.1	0.0884149	0.0579528	1.52564	0.1271	0.519287	Disp2
1198.98	0.180776	0.118881	1.52064	0.128349	0.523332	Zfc3h1
4387.22	0.107873	0.0710027	1.51929	0.128691	0.523332	Adcyap1
2925.24	0.136562	0.0898934	1.51915	0.128725	0.523332	Dnajc13
24638.7	0.0940335	0.0619005	1.51911	0.128736	0.523332	Kif21a
2500.18	-0.120483	0.0794637	-1.51621	0.129467	0.524465	Aars
3044.94	-0.122051	0.0805043	-1.51607	0.1295	0.524465	Tmem130
1501.07	-0.126613	0.0835361	-1.51567	0.129603	0.524465	Ppp2cb
1305.48	-0.146524	0.0967287	-1.5148	0.129824	0.524465	Tmed7
3273.44	0.110849	0.0731986	1.51437	0.129933	0.524465	Soga3
3501.96	-0.112677	0.0744409	-1.51364	0.130117	0.524465	Immt
2728.67	-0.114248	0.0754845	-1.51353	0.130146	0.524465	Atp5f1
1695.14	0.13614	0.0900514	1.51181	0.130583	0.524817	Ggnbp2
1085.42	0.158708	0.104987	1.51169	0.130612	0.524817	Plekha5
1284.79	0.172932	0.114466	1.51078	0.130845	0.524817	Dnajc3
2338.96	0.121548	0.0804614	1.51064	0.130881	0.524817	Ptprg
4248.35	-0.101419	0.0671667	-1.50997	0.131052	0.524856	Faim2
1087.33	-0.146216	0.0969493	-1.50817	0.131512	0.525656	Ube2q1
2620.93	0.116806	0.0774622	1.50792	0.131576	0.525656	Rab3gap2
5753.69	-0.108456	0.0719922	-1.50649	0.13194	0.526463	Snx7
3829.09	0.0998637	0.0663887	1.50423	0.132523	0.527566	Srgap3
1129.88	-0.137699	0.0915457	-1.50415	0.132542	0.527566	Rad23a
1358.77	-0.165093	0.109854	-1.50284	0.132879	0.528066	Stk32a
2762.6	0.108629	0.0723034	1.5024	0.132993	0.528066	Tnks
2963.5	0.143603	0.095644	1.50143	0.133245	0.528419	Rsrp1
1567.95	0.126519	0.084302	1.50079	0.133411	0.528431	Mon2
1908.55	0.12283	0.0819415	1.49899	0.133875	0.529504	Rhoq
2701.73	0.12205	0.0814677	1.49814	0.134097	0.529504	Neto2
1156.61	0.146249	0.097687	1.49711	0.134364	0.529504	Qk
1342.31	-0.134384	0.0897844	-1.49674	0.134462	0.529504	Atf5
1418.63	0.133739	0.0893617	1.4966	0.134498	0.529504	Xpo7
2259.41	-0.123853	0.0828541	-1.49483	0.134958	0.529649	Tuba4a
1846.14	0.120016	0.0802982	1.49463	0.135012	0.529649	Vcpip1
1205.18	0.138921	0.0929596	1.49443	0.135064	0.529649	Tmem229b
4862.59	-0.134996	0.0903619	-1.49395	0.135188	0.529649	Jun
3294.35	-0.126155	0.0845085	-1.49281	0.135487	0.529745	Rnf187
1194.89	-0.135752	0.0909702	-1.49227	0.135629	0.529745	Fh1
1622.13	-0.125316	0.0839924	-1.49199	0.135702	0.529745	Oaz2
78665.7	-0.083184	0.0557946	-1.4909	0.135989	0.530225	Gnas
1121.04	-0.145056	0.09735	-1.49005	0.136211	0.530455	Cdk5
4157.7	0.0967574	0.0649648	1.48938	0.136387	0.530501	Gramd1b
1120.21	-0.141548	0.0951362	-1.48785	0.13679	0.531394	Pdia4
2565.12	0.139136	0.0935962	1.48656	0.137132	0.531394	Ncor2
3207.21	0.126224	0.0849577	1.48573	0.137352	0.531394	Gna13
4476.84	0.101316	0.0682815	1.48379	0.137864	0.531394	Aak1
7879.78	-0.0869641	0.0586117	-1.48373	0.13788	0.531394	Gdi2
1315	-0.132668	0.0894328	-1.48344	0.137958	0.531394	Gipc1
4103.61	-0.107301	0.0723385	-1.48331	0.137992	0.531394	Tle5
2564.82	-0.11103	0.0748669	-1.48304	0.138064	0.531394	Tmem8b
2463.27	-0.142156	0.0959169	-1.48207	0.138321	0.531394	Synpr
2791.25	0.118558	0.0800259	1.48149	0.138475	0.531394	Neo1
3955.1	-0.112588	0.0760086	-1.48125	0.13854	0.531394	Ckmt1
2879.07	-0.127675	0.0862211	-1.48079	0.138663	0.531394	Ptpa
1448.87	-0.12891	0.0870824	-1.48032	0.138788	0.531394	Rexo2
1837.69	-0.12556	0.0848774	-1.47931	0.139057	0.531394	Cnih1
1347.19	0.143123	0.0967539	1.47925	0.139073	0.531394	Tmem74
3556.3	-0.100982	0.0684537	-1.47518	0.140163	0.534467	Cct5
3532.79	0.101601	0.0689094	1.47441	0.140371	0.534467	Col4a3bp
5659.56	-0.104599	0.0709505	-1.47425	0.140414	0.534467	Fkbp1a
1056.34	0.141082	0.0957439	1.47353	0.140608	0.534467	Adgrl3
4513.08	-0.105645	0.0717121	-1.47318	0.140701	0.534467	Atp6ap1
1158.14	-0.146025	0.0991742	-1.47241	0.140911	0.534533	Hexb
2592.28	-0.114411	0.0777302	-1.4719	0.141048	0.534533	Nucb1
2953.15	-0.120142	0.0817352	-1.46989	0.141592	0.535969	Sccpdh
2111.23	-0.147305	0.100285	-1.46887	0.141869	0.536391	Fosb
2340.63	-0.110258	0.0752468	-1.46529	0.142842	0.539108	Acat2
1468.21	0.131751	0.0899319	1.465	0.14292	0.539108	Ubxn7
3006.21	-0.107783	0.0736372	-1.4637	0.143276	0.539822	Arl6ip5
1654.18	-0.137888	0.0942823	-1.4625	0.143605	0.540434	Atf3
10265.6	-0.0963382	0.065913	-1.4616	0.143852	0.540592	Maged1
1139.41	0.142565	0.0975907	1.46084	0.144058	0.540592	Cul5
4922.82	-0.125936	0.0862264	-1.46052	0.144147	0.540592	Ptms
1971.58	-0.114941	0.0788259	-1.45816	0.144795	0.541851	Fam89a
1261.13	0.132801	0.0911043	1.45768	0.14493	0.541851	Xpr1
2830.16	-0.112492	0.0771824	-1.45748	0.144983	0.541851	Rab5b
5825.87	0.140436	0.0964342	1.45628	0.145314	0.542463	Kcnb2
1492.8	-0.122083	0.083888	-1.45531	0.145584	0.542846	Bap1
12797	-0.0988198	0.0679644	-1.45399	0.145948	0.543496	Fth1
3008.05	0.116377	0.0800683	1.45347	0.146094	0.543496	Rcan2
21424	-0.0910049	0.0626796	-1.45191	0.146528	0.543559	Prkar1a
3225.49	-0.107423	0.0740909	-1.44989	0.14709	0.543559	Lztr1
1213.71	-0.140536	0.0969576	-1.44946	0.147209	0.543559	Stoml1
1194.26	-0.14976	0.103349	-1.44906	0.14732	0.543559	Clstn3
1334.58	0.14061	0.0970377	1.44903	0.14733	0.543559	Amer2
1992.84	-0.112866	0.077907	-1.44873	0.147414	0.543559	Spryd7
2738.72	-0.104704	0.0722958	-1.44827	0.147541	0.543559	6330403K07Rik
7644.15	-0.0899283	0.0621125	-1.44783	0.147665	0.543559	Olfm1
2276.62	0.108419	0.0749526	1.4465	0.148038	0.543559	Cpd
1392.22	0.136291	0.0942488	1.44607	0.148157	0.543559	Bicd1
1502.1	-0.123018	0.0850847	-1.44582	0.148226	0.543559	Swi5
1595.02	-0.125046	0.0865004	-1.44561	0.148288	0.543559	Slc25a5
1958.84	0.116318	0.0804636	1.4456	0.148289	0.543559	Stard13
3423.51	0.104346	0.0722778	1.44368	0.148828	0.543782	Lrrc75b
1688.73	-0.118032	0.0817618	-1.44361	0.148849	0.543782	Ric8a
1158.57	0.153748	0.106503	1.4436	0.148853	0.543782	Fam53c
22106.4	0.0802056	0.0556463	1.44135	0.149487	0.545152	Epb41l3
1235.62	-0.135582	0.0941603	-1.43991	0.149893	0.545152	Edf1
3432.78	-0.107108	0.0743884	-1.43984	0.149912	0.545152	Tspyl1
2943.89	-0.104368	0.0725214	-1.43913	0.150114	0.545152	Stx12
1705.63	-0.115757	0.080441	-1.43903	0.150141	0.545152	Atp5j2
15931.1	-0.082787	0.0575451	-1.43864	0.150252	0.545152	Atp6v1b2
27063.5	-0.0954628	0.0663901	-1.43791	0.150461	0.545152	Prph
2337.17	-0.108367	0.075385	-1.43751	0.150572	0.545152	Sh3gl2
27723.9	-0.0873293	0.0608294	-1.43564	0.151104	0.54621	Aldoa
2243.35	-0.108805	0.0758062	-1.4353	0.151201	0.54621	P4hb
1324.35	0.130316	0.0909406	1.43298	0.151864	0.54748	Itsn1
2996.17	-0.10418	0.0727339	-1.43234	0.152045	0.54748	Hadha
2184.25	-0.110101	0.0768701	-1.4323	0.152059	0.54748	Pkia
1359.53	0.140003	0.097813	1.43133	0.152336	0.547869	Otud4
1442.45	-0.128081	0.0895494	-1.43028	0.152636	0.547932	H2-K1
6527.36	-0.120778	0.0844554	-1.43007	0.152696	0.547932	Ppp3ca
3844.39	0.108001	0.0756035	1.42852	0.153142	0.547932	Ano3
4255.07	-0.120541	0.0843902	-1.42838	0.153183	0.547932	Flot1
8550.66	-0.093673	0.0655823	-1.42833	0.153198	0.547932	Pfkp
13673.5	0.087773	0.0614823	1.42761	0.153403	0.548062	Atp8a1
1209.98	0.129084	0.0905309	1.42586	0.153909	0.549263	Rbbp6
1701.67	0.124064	0.0871657	1.42332	0.154644	0.55128	Selenoi
4339.05	-0.141762	0.0997121	-1.42171	0.155109	0.552332	Atp1a3
2022.72	0.133199	0.0939187	1.41824	0.156121	0.553692	Eea1
1911.57	-0.123881	0.0873503	-1.41821	0.156129	0.553692	Cdkn1b
2207.5	-0.118656	0.0837202	-1.41729	0.156397	0.553692	Zfand3
1735.18	-0.116473	0.082224	-1.41653	0.15662	0.553692	Ap2m1
1356.65	0.125072	0.088309	1.4163	0.156687	0.553692	Tnpo1
1984.29	-0.111756	0.0789215	-1.41604	0.156762	0.553692	H13
2034.28	-0.114383	0.0808021	-1.4156	0.156893	0.553692	Tomm20
2643.51	0.111736	0.0789742	1.41485	0.157114	0.553692	Usp33
1627.15	-0.416914	0.294704	-1.41469	0.15716	0.553692	Fabp7
1499.47	-0.124548	0.0880824	-1.41399	0.157364	0.553692	Nrbp1
1559.17	-0.117007	0.08275	-1.41398	0.157369	0.553692	Chtop
7971.52	0.0931626	0.066034	1.41083	0.158296	0.55635	Abhd2
2459.23	-0.10803	0.0766314	-1.40973	0.15862	0.556885	Txnl1
5053.93	0.087826	0.0623749	1.40803	0.159121	0.55711	Hmgcr
1795.07	-0.114469	0.0813103	-1.4078	0.15919	0.55711	Srsf6
27324	0.0944546	0.0671037	1.40759	0.159252	0.55711	Sptan1
3246.58	0.126557	0.0899578	1.40684	0.159474	0.55711	Sema3c
1556.62	0.121373	0.0862876	1.40661	0.159542	0.55711	Gatad2b
1477.73	0.119005	0.0847767	1.40375	0.160393	0.559122	Zmiz2
1564.07	0.121951	0.0868897	1.40352	0.160463	0.559122	Ndst1
2365.53	-0.144088	0.102789	-1.40178	0.160981	0.559339	Cox7b
6796.29	0.0896432	0.0639828	1.40105	0.161199	0.559339	Ncam1
1457.75	-0.117701	0.0840122	-1.401	0.161214	0.559339	Rps11
1148.75	-0.127662	0.091146	-1.40064	0.161323	0.559339	Sumo3
7697.92	-0.0899235	0.0642118	-1.40042	0.161388	0.559339	Tspyl4
4229.86	-0.101942	0.0728853	-1.39867	0.161912	0.559488	Aplp1
31860.1	0.120965	0.0865487	1.39765	0.162218	0.559488	Map1a
3527.13	0.110003	0.0787398	1.39704	0.162401	0.559488	Cpne3
2452.5	-0.119059	0.0852583	-1.39645	0.162578	0.559488	Eif3b
1218.15	0.135122	0.0968077	1.39578	0.16278	0.559488	Ankrd50
1355.6	-0.120921	0.0866367	-1.39572	0.162798	0.559488	Arhgef25
3639.96	0.0958648	0.0686892	1.39563	0.162825	0.559488	Eif5a2
1286.85	-0.151552	0.108649	-1.39488	0.163052	0.559488	Cpne4
4147.58	0.113618	0.0815726	1.39284	0.163668	0.559488	Prkar2b
10793.9	-0.0797828	0.0573102	-1.39212	0.163885	0.559488	Rab6a
1812.52	-0.123644	0.0888544	-1.39154	0.164062	0.559488	Cnp
4064.16	-0.0986018	0.0708598	-1.39151	0.164072	0.559488	Eif4h
5274.17	-0.104024	0.074759	-1.39146	0.164086	0.559488	Vapb
2406.9	-0.117672	0.0845763	-1.39131	0.164131	0.559488	Abhd12
1156.03	0.135562	0.0974404	1.39123	0.164156	0.559488	Naa50
2685.22	0.122418	0.0879995	1.39112	0.16419	0.559488	Rb1cc1
1531.47	-0.117667	0.0847321	-1.38869	0.164926	0.561406	Nipsnap2
2691.72	0.0998394	0.0719959	1.38674	0.165522	0.562844	Slc44a1
2210.47	0.147148	0.106316	1.38405	0.166342	0.563278	Ktn1
1098.37	-0.148234	0.107172	-1.38314	0.166621	0.563278	Ube2a
5215.22	-0.0923379	0.0667723	-1.38288	0.166702	0.563278	Ache
1671.39	0.140864	0.101864	1.38286	0.166709	0.563278	Rab8b
3732.51	0.095534	0.0690956	1.38264	0.166777	0.563278	Clgn
1977.83	-0.1201	0.0868796	-1.38237	0.166858	0.563278	Copg2
1250.72	0.124747	0.0902511	1.38222	0.166904	0.563278	Hnrnpul1
2683.5	-0.10033	0.0726093	-1.38178	0.167039	0.563278	Cct4
2193.73	0.112554	0.0815102	1.38086	0.167321	0.563645	Man2a2
1090.68	0.1455	0.105504	1.3791	0.167865	0.564889	Srgap1
3281.09	-0.108866	0.0790001	-1.37805	0.168189	0.565353	Atp6v0d1
1084.31	0.152133	0.11044	1.37752	0.168351	0.565353	Dok6
1054.46	-0.13507	0.098099	-1.37687	0.168552	0.565443	Wrb
1342.05	-0.121809	0.0885893	-1.37499	0.169136	0.565812	Arrb2
2068.41	-0.149369	0.10864	-1.37491	0.169161	0.565812	Prnp
3895.76	0.0975855	0.0709803	1.37483	0.169185	0.565812	Rgmb
2978.96	-0.91703	0.667962	-1.37288	0.16979	0.56725	Calca
3952.35	-0.100826	0.0735029	-1.37173	0.170147	0.567856	Dclk1
1487.45	-0.124433	0.090761	-1.37099	0.170378	0.568042	A4galt
1908.71	-0.112585	0.0823375	-1.36736	0.171512	0.571014	Rtcb
1142.03	-0.131784	0.0964571	-1.36624	0.171863	0.571014	Rpl22
1956.2	0.128627	0.0942271	1.36507	0.172231	0.571014	Nrg1
1810.07	-0.120315	0.0881535	-1.36484	0.172305	0.571014	Slc27a4
1527.76	0.158651	0.116261	1.36462	0.172373	0.571014	Supt16
2838.78	0.0980806	0.0719141	1.36386	0.172613	0.571014	Dysf
2203.67	-0.101876	0.074757	-1.36276	0.172959	0.571014	Mapre3
1072.38	0.129384	0.0949459	1.36272	0.172972	0.571014	4930402H24Rik
1060.14	0.132003	0.0968694	1.36269	0.17298	0.571014	Sec24b
2487.46	-0.114638	0.0841625	-1.36211	0.173164	0.571014	Amfr
1457.47	0.156064	0.114598	1.36184	0.173249	0.571014	Odr4
1090.63	0.155799	0.11448	1.36092	0.173538	0.571014	Mdm4
1362.26	0.130617	0.0960017	1.36057	0.173649	0.571014	Fndc3a
2288.94	-0.102506	0.075355	-1.36031	0.173733	0.571014	Cops5
1236.22	-0.130828	0.096217	-1.35971	0.173921	0.571051	Gsr
1903.06	-0.106605	0.0784458	-1.35896	0.174159	0.571256	Atcay
1456.57	-0.123569	0.091064	-1.35695	0.174798	0.572216	Fis1
5216.92	-0.266331	0.196297	-1.35678	0.174852	0.572216	Cd9
3673.77	0.0927335	0.0683688	1.35637	0.174981	0.572216	Cnst
2566.87	-0.149687	0.110438	-1.3554	0.17529	0.572649	Fez1
2841.16	-0.0954055	0.0704285	-1.35464	0.175531	0.57286	Saraf
1077.91	-0.125678	0.0928268	-1.3539	0.175768	0.573057	Ppp2r2d
2359.85	0.11169	0.0825615	1.35281	0.176116	0.573155	Fsd1l
1158.36	0.1435	0.10614	1.35199	0.176378	0.573155	Spon1
1764.18	-0.112841	0.0834711	-1.35186	0.176421	0.573155	Vps4a
1055.94	-0.129712	0.0959698	-1.35159	0.176505	0.573155	Clptm1l
1624.6	-0.114891	0.0851774	-1.34884	0.177387	0.575443	Strap
1372.76	0.117938	0.0876369	1.34576	0.178381	0.577817	Baz2a
3840.11	-0.0881107	0.0655432	-1.34432	0.178846	0.577817	Ociad1
7853.31	-0.0960161	0.0714251	-1.34429	0.178854	0.577817	Trpa1
2413.43	-0.0984512	0.0732474	-1.34409	0.178919	0.577817	Psmc2
5980.95	-0.0925535	0.0688739	-1.34381	0.179009	0.577817	S100a10
3367.33	-0.102672	0.07649	-1.3423	0.1795	0.578826	Ppme1
1036.46	0.135778	0.101297	1.3404	0.180116	0.580234	Brwd1
7897.47	0.0869947	0.064938	1.33966	0.180356	0.580432	Plekha6
1256.9	-0.124158	0.0927214	-1.33904	0.180557	0.580503	Acadvl
1465.2	-0.12726	0.0952142	-1.33656	0.181366	0.582527	Cyc1
16431	-0.0799103	0.0598581	-1.33499	0.181878	0.583241	Mapk3
1827.02	-0.108654	0.081434	-1.33426	0.182117	0.583241	Letm1
1760.15	-0.112155	0.0840741	-1.334	0.182203	0.583241	Eif3f
1184.23	-0.141424	0.10604	-1.33368	0.182308	0.583241	Cndp2
2739.89	-0.104314	0.0782834	-1.33252	0.182689	0.583555	Cd99l2
2627.73	0.117358	0.0880877	1.33229	0.182766	0.583555	Sparcl1
1992.93	-0.1066	0.0800924	-1.33096	0.183201	0.584188	Higd1a
1488.38	0.152772	0.114815	1.33059	0.183324	0.584188	Eya1
9999.52	0.0911102	0.0685845	1.32844	0.184034	0.585874	Fam102b
1294.23	0.117964	0.0888843	1.32716	0.184457	0.586644	Mosmo
1552.1	0.117192	0.088379	1.32601	0.184836	0.586876	Ubr2
8681.23	0.0869999	0.0656185	1.32584	0.184891	0.586876	Elavl2
1956.22	-0.110622	0.0838236	-1.3197	0.186935	0.592592	Maoa
1131.86	-0.13537	0.102605	-1.31933	0.187057	0.592592	Eif3e
12724.9	0.0810077	0.0614264	1.31878	0.187244	0.592605	Atp2b4
1058.62	0.133117	0.101071	1.31706	0.187818	0.593843	Atf7
1381.13	0.11742	0.0892437	1.31572	0.188268	0.594046	Slc12a6
2178.2	0.127794	0.0971509	1.31542	0.188368	0.594046	Wwp1
1110.86	-0.122627	0.0932364	-1.31523	0.188432	0.594046	Rdh11
1113.95	-0.124221	0.0945334	-1.31404	0.188831	0.594727	Gabrg2
4147.42	-0.0928243	0.0707261	-1.31245	0.189369	0.595843	Tecr
7812.45	0.102584	0.0783621	1.3091	0.190501	0.598821	Ddx3x
2453.07	-0.100787	0.0770223	-1.30854	0.19069	0.598836	Uqcrc2
1127.92	0.127472	0.0974767	1.30772	0.190969	0.599133	Wapl
5235.72	0.0845557	0.0647285	1.30631	0.191446	0.599476	Arf3
1220.51	-0.129672	0.0992663	-1.30631	0.191448	0.599476	Pmm1
1359.28	0.126186	0.0967266	1.30456	0.192041	0.600754	Matn2
4376.48	0.118333	0.0909653	1.30085	0.193308	0.603764	Myh9
2614.12	-0.102814	0.0790729	-1.30024	0.193519	0.603764	Mid1ip1
1126.99	0.12394	0.0953752	1.2995	0.193773	0.603764	Ccp110
1452.58	0.116154	0.0893935	1.29936	0.193821	0.603764	Dcp2
8987.36	-0.0754741	0.0581352	-1.29825	0.194201	0.603764	Itm2b
1085.14	0.127723	0.0983861	1.29818	0.194224	0.603764	1500004A13Rik
3353.14	-0.0907408	0.0699714	-1.29683	0.194691	0.603764	Pcmt1
1565.95	0.108298	0.0835193	1.29668	0.194742	0.603764	D430019H16Rik
6847.14	-0.0815631	0.0629277	-1.29614	0.194927	0.603764	Cbfb
1682.93	-0.108762	0.0839233	-1.29597	0.194986	0.603764	Map3k12
5277.79	-0.0812728	0.06274	-1.29539	0.195185	0.603764	Wbp2
5434.74	0.0935907	0.0722756	1.29491	0.19535	0.603764	Hspa12a
4966.84	-0.0841045	0.0649627	-1.29466	0.195438	0.603764	Atxn10
1263.15	-0.129035	0.0997277	-1.29388	0.195708	0.603764	Ap1s1
2743.42	-0.0956474	0.0739582	-1.29326	0.19592	0.603764	Sugt1
6231.03	-0.109789	0.0849045	-1.29309	0.195981	0.603764	Tmem176a
1926.24	0.111766	0.0865163	1.29184	0.196412	0.604515	Uggt1
1034.9	-0.129055	0.100114	-1.28908	0.19737	0.606544	Lrrtm2
1353.13	-0.114335	0.08884	-1.28697	0.198104	0.606544	Gorasp2
1800.6	-0.105125	0.081704	-1.28666	0.198212	0.606544	Kif1bp
4596.96	-0.0879637	0.0683793	-1.28641	0.198301	0.606544	Selenow
1055.1	0.137304	0.10674	1.28635	0.198321	0.606544	Zfp451
1322.3	-0.120272	0.0934994	-1.28634	0.198324	0.606544	Mpz
1353.01	0.124822	0.0970486	1.28618	0.198379	0.606544	Slc39a10
2114.61	0.128739	0.100194	1.2849	0.198826	0.607338	Cdc27
3236.5	-0.0895275	0.0697541	-1.28347	0.199327	0.607729	Degs1
2342.34	-0.0984155	0.0766941	-1.28322	0.199414	0.607729	Ak1
1839.37	-0.116706	0.0909811	-1.28275	0.199578	0.607729	Pfn1
2811.54	-0.0989902	0.0771916	-1.2824	0.199704	0.607729	Map2k1
3167.72	0.137572	0.107489	1.27987	0.200592	0.609529	Itga2
1503.01	-0.114756	0.0896782	-1.27964	0.200671	0.609529	Fbxw8
3055.53	0.128545	0.100535	1.27861	0.201035	0.610062	Elovl6
1155.77	-0.123332	0.096515	-1.27785	0.201302	0.610303	Cpne2
2291.02	0.102746	0.0805243	1.27597	0.201967	0.611748	Tmem178b
1103.35	-0.131644	0.103374	-1.27347	0.202851	0.613851	Rpl41
1357.94	-0.109955	0.08638	-1.27293	0.203044	0.613862	Eif1
1776.98	0.106983	0.0840851	1.27232	0.203258	0.613939	Ednrb
8888.61	-0.0780214	0.0614325	-1.27004	0.204072	0.614767	Prkcd
1156.7	-0.130762	0.10298	-1.26978	0.204164	0.614767	C9orf72
1564.61	-0.108398	0.0853782	-1.26962	0.20422	0.614767	Cyhr1
1321.79	-0.12195	0.0960671	-1.26942	0.204291	0.614767	Sirt2
5722.3	0.0906223	0.0714246	1.26878	0.204519	0.614883	Clasp2
1394.87	-0.119173	0.0941135	-1.26626	0.205418	0.616299	Ndufv3
1865.93	0.106403	0.0840468	1.26599	0.205516	0.616299	Selenop
80677.1	0.102712	0.0811608	1.26553	0.205681	0.616299	mt-Nd5
1843.82	-0.108899	0.0861067	-1.2647	0.205979	0.616299	Mob4
2434.96	-0.101396	0.0802447	-1.26359	0.206377	0.616299	Spryd3
1085.25	-0.12538	0.0992454	-1.26333	0.20647	0.616299	Eri3
3394.58	-0.0985337	0.0780626	-1.26224	0.206863	0.616299	Dmtn
2643.56	-0.097605	0.0773421	-1.26199	0.206952	0.616299	Gprasp2
1700.34	0.101228	0.0802159	1.26194	0.206971	0.616299	Stk24
2268.72	-0.10363	0.0821503	-1.26146	0.207141	0.616299	Rap1b
1699.39	-0.11288	0.0895022	-1.26119	0.207239	0.616299	Pi4k2a
1625.81	-0.12144	0.0963232	-1.26076	0.207396	0.616299	Tmem183a
1102.4	0.141779	0.112471	1.26058	0.207459	0.616299	Foxj3
1792.7	0.127551	0.101237	1.25992	0.207696	0.616438	Usp47
3240.91	0.0899194	0.0714176	1.25906	0.208007	0.616796	Dgkg
7376.37	0.0763975	0.06078	1.25695	0.208772	0.618498	Atp2a2
2419.05	-0.102119	0.0813454	-1.25537	0.209343	0.61935	Nudt4
5381.36	0.0908866	0.0724137	1.2551	0.209441	0.61935	2610507B11Rik
1472.46	0.12127	0.0967856	1.25297	0.210216	0.621076	Dtna
1779.77	-0.101278	0.0808919	-1.25201	0.210565	0.621078	Rpn1
5550.81	-0.0925976	0.0739893	-1.2515	0.210752	0.621078	Ndn
1435.9	-0.123859	0.0989953	-1.25116	0.210875	0.621078	Psmb6
1409.97	0.123425	0.0986719	1.25087	0.210983	0.621078	Atp7a
10456.4	-0.0865452	0.0692187	-1.25031	0.211185	0.621109	Fgf13
1139.62	-0.118926	0.0952542	-1.24851	0.211846	0.622088	Ssu72
4881.99	-0.0844346	0.0676367	-1.24835	0.211901	0.622088	Aco2
2223.6	0.0956156	0.0766707	1.24709	0.212363	0.622381	Kcnc4
1998.15	0.105708	0.0847815	1.24683	0.21246	0.622381	Srpk2
1311.32	0.118502	0.0950669	1.24651	0.212576	0.622381	Scaper
4967.52	0.0990629	0.0795221	1.24573	0.212864	0.622662	Prkca
1375.22	0.132911	0.106834	1.24408	0.213469	0.623436	Amotl1
2775.19	-0.0942284	0.0757486	-1.24396	0.213513	0.623436	Bag1
7449.27	-0.0832179	0.0669419	-1.24314	0.213818	0.623763	Lrp11
2507.47	0.0924475	0.0744391	1.24192	0.214266	0.624509	Specc1l
10752	-0.0837398	0.0674586	-1.24135	0.214476	0.624561	Eno2
1080.96	-0.122472	0.098761	-1.24008	0.214944	0.624847	Nup88
1444.56	-0.130735	0.105427	-1.24004	0.21496	0.624847	Aip
4625.88	-0.0804033	0.0648973	-1.23893	0.215371	0.625483	Anxa7
1564.43	0.106177	0.0857575	1.23811	0.215675	0.625806	Elovl7
16243.1	0.0780609	0.0631868	1.2354	0.216682	0.627264	Ttll7
4156.88	-0.0984009	0.0796765	-1.23501	0.216829	0.627264	Atp6v1e1
2954.32	0.0943238	0.0763966	1.23466	0.216957	0.627264	Serpina3n
3000.43	-0.0878519	0.0711552	-1.23465	0.21696	0.627264	Trp53inp2
2386.32	-0.0947691	0.0768052	-1.23389	0.217244	0.627264	Cox6a1
1339.23	0.109948	0.0891248	1.23364	0.217338	0.627264	Sptlc2
4926.41	-0.0853524	0.0692205	-1.23305	0.217557	0.627337	Syn2
3701.05	0.0965032	0.0783109	1.23231	0.217834	0.627579	Ptprs
1184.55	0.166152	0.135043	1.23037	0.218559	0.629108	Zscan26
2696.27	-0.102412	0.0833306	-1.22898	0.21908	0.630048	Gabarap
1825.04	-0.121916	0.0992783	-1.22802	0.219438	0.630062	Chga
1670.07	-0.0997469	0.0812571	-1.22755	0.219617	0.630062	Psma2
5051.58	-0.0796859	0.0649218	-1.22741	0.219667	0.630062	Arl6ip1
1496.4	0.109986	0.089719	1.22589	0.220239	0.630772	Rrbp1
4464.06	-0.100478	0.0819749	-1.22572	0.220303	0.630772	Rangap1
3740.12	0.0881978	0.0721662	1.22215	0.221652	0.634073	Sh3pxd2a
1151.21	-0.145055	0.118839	-1.22061	0.222235	0.634748	Coro1a
2828.26	-0.10144	0.0831171	-1.22044	0.222297	0.634748	Kcnk3
5370.26	-0.0926534	0.0759804	-1.21944	0.222678	0.634748	Calr
1254.89	-0.110012	0.0902337	-1.21919	0.222771	0.634748	Smpd1
2439.63	-0.0914072	0.074989	-1.21894	0.222866	0.634748	Amph
1720.31	0.113529	0.093182	1.21836	0.223087	0.634819	Nbas
16439.6	-0.081821	0.0672008	-1.21756	0.223391	0.635128	Anxa2
5718.03	-0.0825226	0.0678217	-1.21676	0.223696	0.635439	Nrsn1
9069.41	-0.0712405	0.0586042	-1.21562	0.224129	0.635935	Itfg1
1641.47	-0.0992423	0.0816627	-1.21527	0.224263	0.635935	Atp8b2
12485.2	-0.0897176	0.0739119	-1.21385	0.224807	0.636919	Calm3
1498.58	-0.10316	0.0853242	-1.20903	0.22665	0.639147	Fbxo9
1406.18	-0.130244	0.107731	-1.20898	0.226671	0.639147	Abcf2
1470.93	-0.103441	0.0856165	-1.20819	0.226974	0.639147	Ube2r2
1615.04	-0.110909	0.0918086	-1.20805	0.22703	0.639147	Taldo1
3929.3	0.0901904	0.0746703	1.20785	0.227106	0.639147	Opa1
1336.12	-0.124217	0.102876	-1.20744	0.227262	0.639147	Dnajc8
2407.71	-0.0895102	0.0741482	-1.20718	0.227363	0.639147	Dcaf8
1320.88	-0.108202	0.0896452	-1.20701	0.22743	0.639147	Chmp2b
5220.09	0.081926	0.0678935	1.20669	0.227553	0.639147	Epm2aip1
7753.79	-0.0719571	0.0596333	-1.20666	0.227563	0.639147	Gap43
1228.64	0.108686	0.0901217	1.20599	0.227821	0.639318	Washc5
1034.31	0.11405	0.0946192	1.20536	0.228064	0.639447	Arhgap23
1123.69	-0.120683	0.100209	-1.20432	0.228467	0.639698	Bpnt1
4210.41	0.0972623	0.0807913	1.20387	0.228639	0.639698	Dlg2
1527.44	0.131082	0.10891	1.20359	0.22875	0.639698	Tnrc6a
3468.07	0.0938119	0.077976	1.20309	0.228943	0.639698	Lgals8
1789.01	-0.0987645	0.0821437	-1.20234	0.229233	0.639958	Nicn1
5435.75	0.0813787	0.0677702	1.2008	0.229827	0.640603	Chd4
1557.92	0.101653	0.0846601	1.20072	0.229859	0.640603	Ugcg
2103.11	0.11509	0.0959305	1.19972	0.230249	0.640617	Hnrnph1
1183.06	-0.110361	0.091991	-1.19969	0.230259	0.640617	Csnk1e
1428.78	0.10905	0.091033	1.19792	0.230949	0.641808	Smarcc1
3562.66	-0.0804886	0.0672237	-1.19733	0.23118	0.641808	Snx10
5473.69	0.0761658	0.063627	1.19707	0.23128	0.641808	Arhgap35
1870.73	-0.10541	0.0881193	-1.19622	0.231609	0.642171	Psmb7
2121.58	0.107168	0.0896415	1.19551	0.231886	0.642285	Zzef1
1657.2	0.0974536	0.081544	1.1951	0.232046	0.642285	Kbtbd11
1160.8	0.109315	0.0915242	1.19438	0.232327	0.642515	Dlgap4
5649.2	-0.0908177	0.0760854	-1.19363	0.232623	0.642785	Tmem176b
1737.49	-0.0958949	0.0803894	-1.19288	0.232916	0.64284	Arl2bp
3266.85	0.0954904	0.0800713	1.19257	0.233039	0.64284	Etl4
1840.66	-0.0972101	0.081653	-1.19053	0.233839	0.64425	Zfp706
2319.95	-0.0971397	0.0816128	-1.19025	0.233948	0.64425	Cdc37
1034.63	-0.114113	0.095914	-1.18974	0.234149	0.644256	Ttc1
1127.16	-0.12988	0.109522	-1.18589	0.235667	0.647885	Rnf41
3924.12	0.231229	0.195095	1.18521	0.235935	0.648003	Ahnak
7430.14	0.0898237	0.0758786	1.18378	0.2365	0.648003	Nckap1
3688.91	-0.0799221	0.0675164	-1.18374	0.236514	0.648003	Tagln3
3519.14	-0.0834071	0.0704758	-1.18349	0.236617	0.648003	Pgrmc1
2964.27	-0.0867895	0.0733732	-1.18285	0.236869	0.648003	Atxn7l3b
8273.6	-0.0840153	0.071052	-1.18245	0.237028	0.648003	mt-Rnr1
4277.52	0.105569	0.0892952	1.18225	0.237108	0.648003	Tln1
1579.71	0.106571	0.0902118	1.18134	0.237467	0.648343	Ptpn3
16329.4	0.0936892	0.0793354	1.18093	0.237632	0.648343	Apoe
2081.99	-0.0992682	0.0842793	-1.17785	0.238857	0.650028	Adap1
1100.55	-0.113583	0.0964396	-1.17776	0.238892	0.650028	Arhgef4
1440.94	-0.105576	0.0897088	-1.17687	0.239246	0.650028	Rrn3
4589.01	-0.0919893	0.0781654	-1.17685	0.239253	0.650028	Ube2j1
1337.14	-0.102369	0.087018	-1.17641	0.239432	0.650028	Smyd2
6601.56	-0.0802837	0.0682676	-1.17601	0.239589	0.650028	Lamp1
4306.41	-0.0790504	0.067245	-1.17556	0.239771	0.650028	Gng3
1834.05	0.108752	0.0925359	1.17524	0.239898	0.650028	Mgat4a
6438.99	-0.0891269	0.0759207	-1.17395	0.240416	0.650028	Mapk8ip2
7482.94	-0.0827013	0.0704946	-1.17316	0.240733	0.650028	Ppp2r1a
22684.5	0.253894	0.21648	1.17283	0.240864	0.650028	Meg3
85988.3	0.109057	0.0930065	1.17258	0.240965	0.650028	mt-Cytb
1558.26	-0.104936	0.0895316	-1.17205	0.241175	0.650028	Minar2
1129.8	-0.107976	0.0921396	-1.17187	0.241248	0.650028	Zdhhc3
1750.5	0.0979852	0.0836413	1.17149	0.241401	0.650028	Mark1
2005.95	-0.0902163	0.0770455	-1.17095	0.24162	0.650028	Sri
2286.84	-0.0909324	0.0776903	-1.17045	0.241821	0.650028	Clptm1
2760.57	0.0847339	0.0724	1.17036	0.241857	0.650028	Rabgap1l
3291.25	-0.0857826	0.0733739	-1.16912	0.242357	0.650832	Mlf2
3375.69	-0.0823869	0.0705027	-1.16856	0.24258	0.650892	Cfl2
2454.55	0.0888222	0.0761377	1.1666	0.243372	0.652399	Nrbp2
1106.74	0.107605	0.0923395	1.16532	0.243889	0.652399	Gpr155
12466.1	-0.0722655	0.06202	-1.1652	0.243939	0.652399	Aplp2
2433.42	0.0887564	0.0761739	1.16518	0.243946	0.652399	Slc7a1
1237.61	-0.107123	0.0920466	-1.16379	0.244509	0.653179	Stx1a
1144.81	0.126566	0.108784	1.16347	0.24464	0.653179	Cd2ap
2494.31	-0.0845496	0.0727716	-1.16185	0.245297	0.653981	Hnrnpab
1292.54	0.105943	0.0912475	1.16105	0.24562	0.653981	Heatr5b
1204.68	-0.105319	0.0907236	-1.16087	0.245693	0.653981	Stard3nl
1117.98	-0.108623	0.0936047	-1.16045	0.245866	0.653981	Cers2
5410.23	0.108327	0.0933655	1.16025	0.245948	0.653981	Tln2
3804.18	0.0778206	0.0672055	1.15795	0.246885	0.655367	Zbtb4
2069.08	-0.0886559	0.0765828	-1.15765	0.247008	0.655367	Cdip1
9846.05	-0.0742582	0.064155	-1.15748	0.247076	0.655367	Arhgdia
3477.85	-0.0912677	0.0789553	-1.15594	0.247705	0.6565	Ankrd46
1215.5	-0.11063	0.0957838	-1.15499	0.248093	0.656751	Rab39b
1091.32	0.120915	0.10476	1.15421	0.248414	0.656751	Cul4b
2519.17	-0.0864215	0.0748905	-1.15397	0.248512	0.656751	Adipor1
2852.48	-0.0847755	0.0735007	-1.1534	0.248747	0.656751	Rrp1
1219.46	-0.112169	0.0972833	-1.15301	0.248906	0.656751	Zadh2
1600.58	0.0959586	0.0832436	1.15274	0.249015	0.656751	Gapvd1
1298.09	-0.104237	0.0904963	-1.15184	0.249389	0.656751	Sprn
1639.07	-0.0999797	0.0868401	-1.15131	0.249605	0.656751	Osbp
2961.24	-0.0809939	0.0703519	-1.15127	0.249622	0.656751	Klhdc2
2431.78	0.085869	0.074635	1.15052	0.24993	0.657005	Agl
1230.99	0.103777	0.090237	1.15005	0.250124	0.657005	Kansl1
1978.66	-0.0944412	0.0822137	-1.14873	0.250668	0.657629	Ganab
2470.8	-0.095448	0.0831075	-1.14849	0.250767	0.657629	Got2
2978	0.0820594	0.071512	1.14749	0.251179	0.658177	Spin1
1091.42	-0.116903	0.102011	-1.14598	0.251804	0.659283	Atl2
1437.61	-0.0988942	0.0864651	-1.14375	0.252729	0.66099	Fgfr1op2
1587.27	-0.097187	0.0849966	-1.14342	0.252863	0.66099	Prelid1
1490.1	-0.117805	0.103091	-1.14273	0.253152	0.661211	Yars
3965.45	0.074637	0.0654635	1.14013	0.254232	0.661268	Mapk10
3527.3	-0.0774162	0.0679046	-1.14007	0.254256	0.661268	Glud1
1956.16	0.107843	0.0946239	1.13971	0.254409	0.661268	Top2b
5645.04	0.0768946	0.0674989	1.1392	0.254621	0.661268	Pde4dip
1603.54	-0.0959997	0.0842814	-1.13904	0.254687	0.661268	Gpx1
6976.27	0.101835	0.0894097	1.13896	0.254718	0.661268	Dgkz
1959.14	-0.0986865	0.0866467	-1.13895	0.254722	0.661268	Dhx15
1498.82	0.105686	0.0928564	1.13816	0.255052	0.661268	Psme4
1670.92	-0.0936098	0.0822536	-1.13806	0.255094	0.661268	Acsl5
1305.95	0.101772	0.089448	1.13778	0.255212	0.661268	Celsr3
1210.53	-0.10573	0.092993	-1.13697	0.255551	0.661618	Iscu
1194.14	0.133914	0.117843	1.13638	0.255799	0.661618	Pnisr
2505.79	-0.0889128	0.0783304	-1.1351	0.256334	0.661618	Palm
1374.82	-0.112809	0.0993955	-1.13495	0.256397	0.661618	Lsamp
2332.26	-0.0935384	0.082443	-1.13458	0.25655	0.661618	Bag6
3292.71	0.104051	0.0917618	1.13392	0.256828	0.661618	Adam23
4475.35	-0.0732526	0.0646025	-1.1339	0.256837	0.661618	Dync1li1
6526.61	-0.0762028	0.0672242	-1.13356	0.256979	0.661618	Nsf
1814.65	0.0946424	0.0835914	1.1322	0.257549	0.661645	Clip1
1505.68	-0.101125	0.0893193	-1.13217	0.257562	0.661645	Prpf19
1077.05	0.108235	0.0956071	1.13208	0.257601	0.661645	Dcbld2
2817.49	0.111151	0.098441	1.12911	0.258851	0.664328	Plcb4
1859.09	0.0930913	0.0824912	1.1285	0.259109	0.664465	Fus
1529.64	-0.0945266	0.0838129	-1.12783	0.259392	0.664668	Uqcc1
1488.41	0.115029	0.102081	1.12684	0.259812	0.664797	C2cd5
4961.96	-0.0920057	0.081677	-1.12646	0.259972	0.664797	Tubb2b
16815.1	-0.0820218	0.0728319	-1.12618	0.260089	0.664797	Eef2
1044.4	-0.127194	0.112984	-1.12577	0.260263	0.664797	Nhlh2
1892.61	0.102707	0.0913553	1.12426	0.260903	0.665067	Sgcb
3880.86	0.079939	0.0711093	1.12417	0.26094	0.665067	Map7
2231.07	0.0949593	0.0844948	1.12385	0.261077	0.665067	Mtus1
1300.55	-0.10089	0.0897929	-1.12359	0.261189	0.665067	Dgke
2293.81	0.0978782	0.0872739	1.12151	0.262073	0.666795	Kif2a
1790.93	-0.0907226	0.0809676	-1.12048	0.262509	0.666887	Kansl3
3345.72	-0.0789948	0.0705633	-1.11949	0.262932	0.666887	Celf6
7297.36	-0.0675475	0.0603478	-1.1193	0.263011	0.666887	Nptn
1079.74	-0.120792	0.10802	-1.11823	0.263468	0.666887	Lypla2
16608.1	-0.0900155	0.0805806	-1.11709	0.263958	0.666887	Eef1a2
1494.58	-0.0935146	0.0837166	-1.11704	0.263979	0.666887	Elp3
2170.2	-0.0914448	0.0818919	-1.11665	0.264143	0.666887	Creld1
2340.13	0.0973191	0.0871583	1.11658	0.264175	0.666887	Reps2
1489.75	-0.0962808	0.0862306	-1.11655	0.264187	0.666887	Srp14
1833.98	-0.0884031	0.0792065	-1.11611	0.264376	0.666887	Ran
2541.22	-0.0806438	0.0722895	-1.11557	0.264607	0.666887	Arpc1a
2978.6	0.0932431	0.0836101	1.11521	0.264759	0.666887	Mast1
6995.42	0.0857452	0.0768904	1.11516	0.264781	0.666887	Nos1
6696.53	-0.0817913	0.0734612	-1.11339	0.265539	0.667726	Actr1a
1539.79	0.104916	0.094287	1.11273	0.265826	0.667726	Rnf130
3575.15	-0.0760425	0.0683668	-1.11227	0.266021	0.667726	Fxyd2
2409.5	-0.0852616	0.0767174	-1.11137	0.266408	0.667726	Setd3
1204.4	0.100232	0.0901907	1.11134	0.266424	0.667726	Snx12
1684.33	0.090428	0.0813784	1.1112	0.26648	0.667726	Scaf11
2894.39	0.0983643	0.0885561	1.11076	0.266673	0.667726	Abca2
1039.17	0.12875	0.115942	1.11047	0.266797	0.667726	Suz12
2340.88	-0.0914398	0.0823727	-1.11007	0.266967	0.667726	Habp4
2762.11	-0.0847023	0.0763551	-1.10932	0.267292	0.668024	Usp20
1068.24	-0.117162	0.105717	-1.10826	0.267749	0.668651	Suds3
1216.93	0.101764	0.0918714	1.10768	0.268	0.66867	Baz1b
2966.45	0.0857465	0.0774428	1.10722	0.268197	0.66867	Cers4
12021.9	-0.0659656	0.0596225	-1.10639	0.268559	0.66867	Eif4a2
5235.88	-0.0712474	0.0643994	-1.10634	0.268581	0.66867	Pdia3
1309.38	-0.096341	0.0871919	-1.10493	0.26919	0.669671	Msantd4
2245.45	-0.0871702	0.0789801	-1.1037	0.269724	0.670487	Rad21
1860.42	0.120506	0.109249	1.10305	0.270007	0.670543	Th
1602.93	-0.0983663	0.0892055	-1.10269	0.27016	0.670543	Sar1a
14970.8	-0.067187	0.0610698	-1.10017	0.271259	0.671929	Mapt
3598.13	-0.0744301	0.0677136	-1.09919	0.271685	0.671929	Npepps
1925.69	-0.0914037	0.0831575	-1.09916	0.271697	0.671929	Parp6
1161.7	0.110759	0.100775	1.09907	0.271738	0.671929	Strbp
1790.51	-0.090777	0.0825973	-1.09903	0.271754	0.671929	Chn1
1134.21	-0.114527	0.104331	-1.09772	0.272326	0.672009	Lox
2067.66	0.0854894	0.0778811	1.09769	0.27234	0.672009	Lpgat1
3385.68	-0.0843173	0.0768652	-1.09695	0.272663	0.672009	Cd151
5277.9	0.0862544	0.078789	1.09475	0.273626	0.672009	Actr2
1912.15	-0.0913143	0.083416	-1.09469	0.273654	0.672009	Dhrs1
8942.46	0.0837646	0.0765302	1.09453	0.273722	0.672009	Tcaf1
7082.5	-0.0695223	0.0635606	-1.0938	0.274045	0.672009	Cplx1
1112.32	-0.104753	0.0957942	-1.09352	0.274166	0.672009	Arhgap1
1486.17	0.10381	0.0949385	1.09344	0.274201	0.672009	Pds5a
6812.54	0.0876125	0.0801432	1.0932	0.274306	0.672009	Etv1
2735.31	-0.0872198	0.0797998	-1.09298	0.274402	0.672009	Rhoa
1272.17	0.0999302	0.0916048	1.09088	0.275324	0.672009	Strn
1190.87	-0.101932	0.0935099	-1.09006	0.275685	0.672009	Baalc
2212.37	-0.0835208	0.0766589	-1.08951	0.275928	0.672009	Mtch2
3721.88	0.0806765	0.0740632	1.08929	0.276025	0.672009	Selenot
3355.44	0.0774857	0.0711417	1.08917	0.276078	0.672009	Peg13
1501.46	0.106048	0.0974414	1.08832	0.276452	0.672009	Usp13
2835.72	-0.0817289	0.0750967	-1.08832	0.276456	0.672009	Slc39a6
1400.19	-0.100617	0.0924659	-1.08815	0.27653	0.672009	Tspan17
1069.65	0.10917	0.100342	1.08798	0.276605	0.672009	Scyl2
2669.89	0.0821579	0.0755196	1.0879	0.276639	0.672009	Clcn3
20427.7	0.0734808	0.067607	1.08688	0.277089	0.672009	Pafah1b1
1369.95	-0.0977214	0.0899406	-1.08651	0.277253	0.672009	Psma1
2863.73	-0.0838835	0.0772123	-1.0864	0.277302	0.672009	Gnb2
1081.75	0.107207	0.0987011	1.08617	0.277402	0.672009	H3f3b
1040.18	-0.109883	0.101183	-1.08599	0.277483	0.672009	Socs3
5492.13	-0.070645	0.0650787	-1.08553	0.277687	0.672009	Cdc42
3705.15	-0.0839914	0.0773809	-1.08543	0.277732	0.672009	Rab7
2235.18	-0.086247	0.0794692	-1.08529	0.277794	0.672009	Tusc3
1146.84	-0.102329	0.0944143	-1.08383	0.278442	0.673075	Psma4
8062.67	-0.0634834	0.0586466	-1.08247	0.279042	0.674023	Dync1i2
2315.03	0.0979445	0.090707	1.07979	0.280236	0.675914	Usp15
3333.37	0.0781232	0.0723513	1.07978	0.280242	0.675914	Rap1gap2
1930.83	0.127173	0.117874	1.07888	0.280639	0.676132	Ankrd12
1738.24	0.0884776	0.0820577	1.07824	0.280929	0.676132	Spred2
2149.56	-0.0952913	0.0884515	-1.07733	0.281334	0.676132	Htr3b
1422.74	0.0925679	0.0859462	1.07704	0.28146	0.676132	Cux2
2621.46	0.0868114	0.0806026	1.07703	0.281467	0.676132	Polr2a
2439.72	0.082374	0.0765092	1.07665	0.281635	0.676132	Pbx1
2047.75	-0.0921125	0.0855822	-1.0763	0.281791	0.676132	Cmas
1086.13	0.114854	0.106999	1.07341	0.283089	0.677941	Yipf6
4458.13	0.0710267	0.0661867	1.07313	0.283214	0.677941	Larp1
2281.55	-0.10143	0.0945404	-1.07287	0.283329	0.677941	Tpd52
7567.83	-0.0702701	0.065532	-1.0723	0.283584	0.677941	Serinc3
3450.51	0.0927672	0.0865132	1.07229	0.28359	0.677941	Cnr1
3381.08	0.0808011	0.0754848	1.07043	0.284426	0.678243	Sucla2
1999.14	0.0838364	0.0783286	1.07032	0.284476	0.678243	Insig1
2899	-0.0820953	0.076741	-1.06977	0.284722	0.678243	Ddx24
1076	0.283512	0.265045	1.06967	0.284766	0.678243	Gria3
1236.68	0.096057	0.0898175	1.06947	0.284859	0.678243	Sec24c
1570.7	0.0887441	0.082999	1.06922	0.284971	0.678243	Setd5
1833.63	0.0920281	0.086138	1.06838	0.285349	0.678354	Ttbk1
2713.96	-0.0836731	0.0784209	-1.06697	0.285983	0.678354	Sod2
1173.36	-0.100724	0.0944204	-1.06677	0.286078	0.678354	Pqlc3
3812.83	-0.0820844	0.0769633	-1.06654	0.28618	0.678354	Trnp1
3467.51	0.0730399	0.0684838	1.06653	0.286185	0.678354	Mbnl1
1108.94	0.098461	0.0923358	1.06634	0.286272	0.678354	Rapgef1
1960.56	0.0864699	0.0811833	1.06512	0.286822	0.679162	Acaca
1852.17	0.091014	0.0855584	1.06377	0.287435	0.679959	Nol4l
22326.2	-0.0588916	0.0553813	-1.06338	0.287607	0.679959	Fgf1
1136.32	0.108337	0.101917	1.06299	0.287788	0.679959	Togaram1
1127.33	-0.0999366	0.0940873	-1.06217	0.288159	0.680018	Zfp365
1185.88	-0.0994807	0.0936722	-1.06201	0.288232	0.680018	Copz1
1351.98	-0.0924336	0.0870859	-1.06141	0.288505	0.680167	Mtmr2
2832.23	-0.0942779	0.0888837	-1.06069	0.288832	0.680443	Fxr2
1139.49	0.10522	0.0993465	1.05912	0.289545	0.681628	Adipor2
2129.45	-0.0806243	0.0761603	-1.05861	0.289776	0.681678	Dynll1
1612.43	-0.104025	0.0983212	-1.05801	0.290052	0.681831	Cystm1
3017.21	0.074157	0.0701886	1.05654	0.290722	0.682494	Armh4
2868.19	-0.0819144	0.077536	-1.05647	0.290754	0.682494	Dlg4
3853.85	-0.0752438	0.0712563	-1.05596	0.290986	0.682544	Atp6v0e2
1403.44	0.137714	0.130566	1.05475	0.291541	0.682671	Dnajb4
1044.94	0.122219	0.1159	1.05452	0.291643	0.682671	Rab11fip2
5892.39	0.0723195	0.0685843	1.05446	0.291671	0.682671	Son
1971.86	0.0866344	0.0821977	1.05398	0.291894	0.682698	Pigk
1313.45	-0.0931871	0.0885238	-1.05268	0.292488	0.683139	Neurl4
2669.62	0.0922677	0.0876531	1.05265	0.292503	0.683139	Fxr1
6476.85	0.0661751	0.0630223	1.05003	0.293705	0.685453	Mapre2
3214.29	-0.0801145	0.0764177	-1.04838	0.294466	0.68625	Napa
1260.5	-0.0947697	0.0903975	-1.04837	0.29447	0.68625	Bnip3
2465.36	-0.0890345	0.0849656	-1.04789	0.29469	0.68627	Lars2
1674.46	-0.0975759	0.0932489	-1.0464	0.295375	0.68666	Ilk
3636.92	0.0813809	0.0777959	1.04608	0.295523	0.68666	Eif4g3
1056.33	0.100654	0.0962764	1.04547	0.295807	0.68666	Ppm1f
10802	-0.0737743	0.0705772	-1.0453	0.295885	0.68666	Gabbr1
2749.63	0.0769297	0.0736259	1.04487	0.296082	0.68666	Ap1g1
4774.45	0.0693455	0.0664018	1.04433	0.296332	0.68666	Emb
1364.87	-0.103415	0.0990268	-1.04432	0.296339	0.68666	Atp5mpl
12774.2	-0.0592485	0.0567694	-1.04367	0.296638	0.686672	Gpi1
2080.87	0.0946649	0.0907798	1.0428	0.297042	0.686672	Appl1
15873	-0.0621921	0.0596454	-1.0427	0.297088	0.686672	Ywhab
1470.97	0.104015	0.0997767	1.04248	0.297191	0.686672	Tmem63c
1074.19	-0.111278	0.10688	-1.04115	0.297807	0.687218	Tvp23a
2435.83	0.081877	0.0787685	1.03946	0.298589	0.687218	Rabgap1
1096.11	0.103362	0.0994388	1.03945	0.298594	0.687218	Rnf38
4213.38	-0.0723142	0.0695881	-1.03918	0.298723	0.687218	Gars
2220.05	0.103996	0.100139	1.03851	0.29903	0.687218	Elmo1
1744.68	-0.0892546	0.0860127	-1.03769	0.299414	0.687218	Evl
6601.82	0.0738492	0.0712073	1.0371	0.299688	0.687218	Dpysl2
1134.63	0.119816	0.11553	1.0371	0.29969	0.687218	Suco
1197.49	0.0964024	0.0929877	1.03672	0.299866	0.687218	Dyrk1a
1842.17	0.0817372	0.0789341	1.03551	0.30043	0.687218	Nek9
2145.24	-0.0894998	0.0864478	-1.0353	0.300527	0.687218	Pcbp1
2874.08	-0.0861724	0.0832616	-1.03496	0.300688	0.687218	Cd55
9904.18	0.0738696	0.0713754	1.03494	0.300695	0.687218	Ncoa7
1074.09	-0.105117	0.101571	-1.03492	0.300709	0.687218	Igsf8
4782.45	0.0795538	0.07691	1.03438	0.300961	0.687218	Fam189b
1538.59	-0.237658	0.229832	-1.03405	0.301112	0.687218	Wls
2689.64	-0.0774785	0.0749614	-1.03358	0.301333	0.687218	Tmem50a
2437.89	0.0780662	0.0755995	1.03263	0.301778	0.687218	Sgip1
1809.59	-0.104141	0.100937	-1.03173	0.302197	0.687218	Ldb2
2412.4	0.078812	0.0763916	1.03168	0.30222	0.687218	Stx1b
1332.76	-0.0892874	0.0866126	-1.03088	0.302596	0.687218	Fbxo28
1465.71	0.095749	0.0928839	1.03085	0.302613	0.687218	Scn5a
1069.7	0.131074	0.127174	1.03067	0.302695	0.687218	Smc3
1613.99	-0.106834	0.103728	-1.02995	0.303036	0.687218	Ola1
1319.33	-0.0897755	0.0871713	-1.02988	0.303069	0.687218	Ranbp9
1079.48	0.102534	0.099567	1.0298	0.303105	0.687218	Fip1l1
1686.47	0.0845068	0.0820795	1.02957	0.303211	0.687218	Ptbp3
2459.58	-0.0756796	0.0735283	-1.02926	0.303359	0.687218	Rab18
19200.4	0.0573058	0.0557463	1.02798	0.303961	0.687705	Cyfip2
3129.24	-0.0718308	0.0698813	-1.0279	0.303998	0.687705	Stx7
2274.48	0.0843549	0.082174	1.02654	0.304637	0.688105	Ubap2
1059.62	-0.102808	0.100182	-1.02621	0.304792	0.688105	Nae1
1095.82	-0.0994784	0.0969414	-1.02617	0.304811	0.688105	Sae1
1600.4	0.12873	0.126432	1.01817	0.308596	0.696164	Naa15
1084.07	-0.113374	0.111583	-1.01605	0.309605	0.697956	Trappc4
1847.97	-0.0821063	0.0808965	-1.01495	0.310127	0.698532	45541
6460.61	0.0869719	0.0857398	1.01437	0.310406	0.698532	Cckar
10297.7	-0.0595996	0.0587675	-1.01416	0.310507	0.698532	Syngr1
2104.99	0.0887149	0.0875229	1.01362	0.310764	0.698628	Zmynd11
1213.85	-0.0919168	0.0907243	-1.01314	0.310991	0.698653	Tmem9b
1669.8	0.0892065	0.088271	1.0106	0.312209	0.699908	Kalrn
1356.03	-0.0959732	0.0949781	-1.01048	0.312267	0.699908	Fbh1
1117.72	-0.09441	0.0935537	-1.00915	0.312901	0.699908	Atp6v1f
1424.52	-0.0908228	0.0900035	-1.0091	0.312925	0.699908	Serf2
2538.93	-0.0781939	0.0774957	-1.00901	0.31297	0.699908	Psmc1
1489.97	0.107445	0.106507	1.00881	0.313066	0.699908	Gria2
2752.86	0.0839628	0.0832954	1.00801	0.313448	0.699908	Larp4b
2487.34	0.0747811	0.0741868	1.00801	0.31345	0.699908	Entpd3
7509.24	0.0899678	0.0892606	1.00792	0.313491	0.699908	Dnm1l
1064.41	-0.102169	0.101535	-1.00625	0.314294	0.701217	Eif2b5
1371.76	-0.0968972	0.0963381	-1.0058	0.31451	0.701217	Rps6ka2
1145.35	0.0936394	0.0932983	1.00366	0.315544	0.70304	Myo1d
1581.72	0.0902425	0.0900467	1.00217	0.316259	0.703258	Casc4
4380.34	0.0644596	0.064326	1.00208	0.316307	0.703258	Amigo1
3221.1	-0.0707693	0.0706518	-1.00166	0.316506	0.703258	Dnajc7
4541.7	-0.067314	0.0672155	-1.00147	0.316602	0.703258	Nars
1147.28	-0.0927613	0.0926494	-1.00121	0.316726	0.703258	Dctn6
1396.53	0.109058	0.109136	0.999285	0.317657	0.704518	Pnpla8
6401.82	-0.0628963	0.062954	-0.999084	0.317754	0.704518	Ppp2r2c
4056.37	0.0875024	0.087724	0.997475	0.318534	0.704518	Tax1bp1
2057.96	-0.0757705	0.075966	-0.997426	0.318558	0.704518	Ppip5k1
2096.06	-0.0923965	0.0926394	-0.997377	0.318581	0.704518	Anapc2
1834.75	-0.0903446	0.090645	-0.996686	0.318917	0.704518	Atg3
1305.08	0.0886213	0.088929	0.99654	0.318988	0.704518	Gab2
5029.53	-0.064341	0.0645702	-0.996451	0.319031	0.704518	Chmp4b
1370.48	-0.0881607	0.0885223	-0.995915	0.319292	0.704613	Itpk1
5097.41	0.069478	0.0698007	0.995378	0.319553	0.70471	Spock1
2010.89	0.0860588	0.0865091	0.994795	0.319836	0.704856	Luc7l2
5438.26	-0.0740618	0.0745469	-0.993493	0.32047	0.705308	Cpe
2547.77	0.0803299	0.080857	0.993481	0.320476	0.705308	Pank3
1662.36	-0.0863626	0.0869955	-0.992725	0.320844	0.705639	Pdia6
2294.68	0.0957429	0.0965123	0.992028	0.321184	0.705908	Tlk1
2017.98	-0.0944513	0.0952955	-0.991141	0.321617	0.706355	Dicer1
1265.7	0.0916972	0.0925563	0.990719	0.321823	0.706355	Fscn1
1229.74	0.0922444	0.0932208	0.989525	0.322406	0.707157	Mapk14
3408.09	-0.0699403	0.0707519	-0.988529	0.322894	0.707748	Dnaja2
2382.8	-0.0926049	0.0937577	-0.987705	0.323297	0.707805	Tbcd
2032.64	0.086177	0.0872603	0.987585	0.323356	0.707805	Cacna1h
1632.1	-0.0921494	0.0934665	-0.985909	0.324178	0.708401	Emc7
1243.56	0.091285	0.0927166	0.984559	0.324841	0.708401	Pcyt1a
1554.12	0.104504	0.106158	0.984418	0.32491	0.708401	Zfp36
1196.32	-0.0881519	0.0895484	-0.984406	0.324916	0.708401	Snx32
3759.7	0.0701282	0.0712499	0.984257	0.324989	0.708401	Unc13a
2555.73	-0.0708667	0.0720176	-0.984018	0.325107	0.708401	Ssr3
1481.95	0.0848356	0.0862225	0.983915	0.325157	0.708401	Large1
1097.3	0.0978465	0.0994951	0.983431	0.325396	0.708445	Rrm2b
1677.82	0.085124	0.0866618	0.982256	0.325974	0.709228	Ltn1
1418.71	0.0871032	0.0888095	0.980787	0.326698	0.710327	Arhgef10l
5937.25	-0.0612138	0.0624468	-0.980256	0.32696	0.71042	Copa
66247.7	0.0665239	0.0679211	0.979428	0.327369	0.710832	mt-Nd1
1067.11	0.0933805	0.0954282	0.978542	0.327806	0.711306	Zfp275
4251.82	-0.0674986	0.0690235	-0.977908	0.32812	0.71138	Tcp1
1534.86	0.0938677	0.0960198	0.977587	0.328279	0.71138	Arnt2
2381.18	-0.0748362	0.0766303	-0.976588	0.328773	0.711976	Ik
8660.47	-0.0702172	0.071985	-0.975442	0.329341	0.71273	Capns1
1934.24	-0.084291	0.086471	-0.974789	0.329665	0.712956	Tfrc
12409.4	0.0697608	0.0716699	0.973364	0.330372	0.713854	Napb
1583.09	-0.0924687	0.0950281	-0.973066	0.33052	0.713854	Os9
1107.8	-0.093774	0.0965503	-0.971245	0.331426	0.714044	Eif3h
1455.7	-0.0858101	0.0883876	-0.970839	0.331629	0.714044	Gna11
1638.39	0.084285	0.0868337	0.970648	0.331723	0.714044	Cpeb4
27227.5	-0.0751521	0.0774251	-0.970643	0.331726	0.714044	Tubb3
6316.73	-0.0693635	0.071483	-0.970349	0.331873	0.714044	Add1
1325.68	-0.0985752	0.101599	-0.970235	0.331929	0.714044	Rps5
1741.86	0.0791377	0.0818331	0.967062	0.333513	0.71661	Kbtbd2
1325.5	-0.11708	0.121111	-0.966722	0.333683	0.71661	Galnt17
5266.58	-0.063653	0.0658704	-0.966336	0.333876	0.71661	Msmo1
5871.86	0.090855	0.0940453	0.966077	0.334006	0.71661	Serpini1
1152.52	-0.102745	0.106464	-0.965069	0.33451	0.716819	Cavin2
1090.94	-0.0896262	0.092877	-0.964999	0.334545	0.716819	Vti1a
2404.18	-0.0764757	0.0793781	-0.963436	0.335329	0.717313	Npdc1
4420.5	-0.0629602	0.0653782	-0.963016	0.33554	0.717313	Vim
1570.35	-0.0916463	0.0952081	-0.96259	0.335753	0.717313	Dbnl
3224	-0.082347	0.0855635	-0.962408	0.335845	0.717313	Dnaja1
1178.71	0.0904901	0.0940318	0.962335	0.335881	0.717313	Cntn5
1115.17	-0.0905837	0.0944918	-0.95864	0.33774	0.720283	Dpp9
5935.01	-0.0603478	0.063024	-0.957536	0.338297	0.720283	Clu
2217.92	-0.0744838	0.0777873	-0.957532	0.338299	0.720283	Copb2
3008.86	-0.070669	0.0738083	-0.957466	0.338332	0.720283	Hp1bp3
1174.95	0.106956	0.111727	0.957293	0.338419	0.720283	Bcl2l13
1718.58	-0.0802807	0.0839197	-0.956637	0.33875	0.720283	4833439L19Rik
3072.82	-0.0730602	0.0763839	-0.956488	0.338826	0.720283	Ube2b
1121.43	-0.0923333	0.0966608	-0.95523	0.339461	0.721161	Ufc1
1164.92	0.0886082	0.0928603	0.95421	0.339977	0.721784	Map3k4
2879.97	0.0703002	0.0737806	0.952829	0.340677	0.722797	Isl1
1592.36	0.0833855	0.0877738	0.950004	0.34211	0.725163	Wipf3
1647.58	0.0852929	0.0898057	0.94975	0.34224	0.725163	Rmnd5a
1255.04	-0.0853323	0.0899017	-0.949173	0.342533	0.725212	Hcfc1r1
1277.56	-0.0844043	0.0889872	-0.9485	0.342875	0.725212	M6pr
2906.67	-0.0765327	0.0806979	-0.948385	0.342933	0.725212	Syt9
1222.02	-0.0970163	0.10248	-0.946686	0.343799	0.726569	Csk
2824.81	0.393796	0.416463	0.945574	0.344366	0.727294	Impact
1258.28	-0.0842825	0.0892053	-0.944815	0.344753	0.727638	Tapbp
1523.33	0.0790499	0.0837407	0.943984	0.345178	0.72806	Wasf3
2458.34	0.0819743	0.0869972	0.942263	0.346058	0.729323	Adam19
1944.54	0.0807362	0.0857132	0.941935	0.346226	0.729323	Inpp5f
18006.4	0.0558695	0.0593797	0.940884	0.346764	0.729983	Nedd4
1514.16	-0.082232	0.0875389	-0.939377	0.347537	0.729999	45353.1
2994.09	0.0734252	0.0781661	0.939348	0.347552	0.729999	Sc5d
1717.26	0.076591	0.0815386	0.939322	0.347566	0.729999	Man1a2
1298.78	-0.0902507	0.0961548	-0.938598	0.347937	0.729999	Stat6
3845.09	-0.0623732	0.066475	-0.938296	0.348092	0.729999	Rab14
10914.3	0.0572741	0.0610443	0.938238	0.348122	0.729999	Pja2
4893.27	0.0623982	0.0665731	0.937288	0.348611	0.730551	Cyb5r3
28399.3	-0.0554695	0.059424	-0.933454	0.350586	0.734216	Ndrg4
1046.41	-0.541537	0.580831	-0.932349	0.351156	0.734909	Aqp1
1204.5	-0.0868881	0.0932341	-0.931936	0.35137	0.734909	Ptdss1
2693.28	-0.103557	0.111458	-0.929119	0.352828	0.736572	Sh3bgrl2
67280.5	0.0571032	0.0614714	0.92894	0.35292	0.736572	Fstl1
2023.89	0.0882724	0.0950324	0.928867	0.352958	0.736572	Trappc8
3873.5	0.0718343	0.0773539	0.928645	0.353073	0.736572	Rab1a
19756.5	-0.0510836	0.0550541	-0.92788	0.35347	0.736926	Ctsb
1855.84	-0.0905682	0.0977423	-0.926602	0.354133	0.737587	Lrrc59
1979.26	-0.0778211	0.0840044	-0.926393	0.354242	0.737587	Hpcal1
1116.55	-0.0937405	0.101259	-0.925753	0.354574	0.737654	H1f0
9833.91	-0.0605338	0.0654097	-0.925456	0.354729	0.737654	Hspa8
5381.88	0.0740646	0.0800761	0.924928	0.355003	0.737752	Negr1
1306.89	-0.0887628	0.0961421	-0.923246	0.355879	0.739021	Tmem250-ps
2317.03	-0.070452	0.0763393	-0.92288	0.35607	0.739021	Atp6v1g2
3010.34	-0.073223	0.0794434	-0.921701	0.356685	0.739423	Kctd10
1369.86	0.110305	0.11971	0.921429	0.356826	0.739423	Lrrn1
1299.15	-0.0875598	0.0950499	-0.921198	0.356947	0.739423	Smdt1
3232.76	0.0651646	0.0708565	0.91967	0.357745	0.739992	Supt6
3624.04	-0.0664248	0.072253	-0.919336	0.35792	0.739992	Ubqln1
2976.5	0.0731414	0.0795727	0.919176	0.358003	0.739992	Cpeb2
2507.96	-0.0730555	0.0795351	-0.918531	0.358341	0.739992	Mff
10551.1	0.0776892	0.0845836	0.91849	0.358362	0.739992	Necab1
1039.62	-0.0869407	0.0947336	-0.917739	0.358756	0.740333	Otud5
1268.16	0.0829092	0.090469	0.916438	0.359437	0.741184	Zmynd8
3272.46	0.0723692	0.0789988	0.91608	0.359625	0.741184	Pcdh1
5968.73	0.0730244	0.0797595	0.915558	0.359899	0.741277	Csde1
1835.44	-0.0718297	0.078578	-0.91412	0.360654	0.742361	Stau2
2662.22	-0.0855432	0.0937551	-0.912411	0.361552	0.743059	Camk2g
1666.88	-0.0815051	0.0893336	-0.912368	0.361575	0.743059	Psme3
2724.39	-0.0736361	0.0807754	-0.911615	0.361972	0.743059	Psmc5
1698.78	0.0731508	0.080349	0.910414	0.362604	0.743059	Ppp1r12b
1266.01	-0.0899639	0.0988775	-0.909852	0.362901	0.743059	Tmem38a
1260.58	-0.0849163	0.0933583	-0.909574	0.363047	0.743059	Kcnh2
1290.21	0.0796096	0.0875655	0.909143	0.363274	0.743059	Pogk
3687.15	0.0841277	0.0925751	0.908752	0.363481	0.743059	Ppfia2
3759.69	0.060433	0.0665445	0.908159	0.363794	0.743059	Ptpra
1687.14	0.0873067	0.0961369	0.90815	0.363799	0.743059	Fbxo11
1193.07	-0.101661	0.111945	-0.908135	0.363807	0.743059	Cab39l
2099.81	-0.0765648	0.0843847	-0.907331	0.364232	0.743059	Cyb5r1
1487.93	0.079169	0.0872928	0.906935	0.364441	0.743059	Fam117b
1691.41	-0.0777739	0.0857578	-0.906902	0.364459	0.743059	Ssbp2
1168.69	-0.0977567	0.1078	-0.906837	0.364493	0.743059	Stat5b
1042.52	0.0862234	0.0951847	0.905853	0.365014	0.743059	Pdap1
1449.32	0.0789796	0.0872282	0.905436	0.365235	0.743059	Dnajc18
3063.13	-0.0684856	0.0756515	-0.905277	0.365319	0.743059	Cltb
4572.7	0.066534	0.0735097	0.905105	0.36541	0.743059	Alcam
1946.25	0.0714066	0.0789741	0.904178	0.365901	0.743059	Sfpq
3270.08	-0.0622826	0.0688837	-0.90417	0.365905	0.743059	Chrnb4
6038.33	0.066798	0.0738972	0.903931	0.366032	0.743059	Trim44
3922.52	-0.0617985	0.0684201	-0.903222	0.366408	0.743357	Cbx6
3232.29	-0.07623	0.0845031	-0.902097	0.367005	0.743831	Map1lc3b
21046	-0.0542048	0.0600995	-0.901918	0.3671	0.743831	Klc1
2935.75	0.0653003	0.0724668	0.901106	0.367532	0.744241	Mcam
4102.69	0.0637824	0.0708632	0.900079	0.368078	0.744697	Ehd3
1091.29	0.0886502	0.0985296	0.899732	0.368263	0.744697	Xpo6
1986.99	-0.0700721	0.0779108	-0.899388	0.368446	0.744697	Zmat2
3269.81	-0.0711978	0.079201	-0.89895	0.368679	0.744704	Cdk16
4175.2	0.072724	0.0809744	0.898111	0.369126	0.744788	Frmd4a
1421.57	-0.0822732	0.0916576	-0.897614	0.369391	0.744788	Psmd3
1103.56	-0.0932	0.103892	-0.897089	0.369672	0.744788	Gstm5
1183.01	-0.0900442	0.100406	-0.896802	0.369824	0.744788	Dym
2931.09	0.0673937	0.0752254	0.89589	0.370311	0.744788	Ppp2r2b
1883.23	0.0728061	0.0812709	0.895845	0.370336	0.744788	Vezt
5859.57	-0.0616381	0.0688077	-0.895803	0.370358	0.744788	Crip2
2441.5	-0.0674291	0.0753035	-0.89543	0.370557	0.744788	Dynlrb1
1128.48	-0.0865972	0.0968342	-0.894283	0.37117	0.745558	Anp32a
2305.28	-0.0703441	0.0787474	-0.893287	0.371703	0.746167	Acss2
2409.28	-0.0678688	0.0760701	-0.892188	0.372292	0.746763	Retreg1
1613.85	-0.0758375	0.0851175	-0.890974	0.372943	0.746763	Rtf2
12536.8	0.169425	0.1903	0.890304	0.373303	0.746763	Snhg11
1146.18	0.106042	0.119205	0.889581	0.373691	0.746763	Kcnj3
3450.95	0.0623234	0.0700672	0.88948	0.373745	0.746763	Tm9sf3
1715.36	0.076117	0.0856166	0.889044	0.373979	0.746763	Slc35b4
2731.8	0.0640648	0.0720958	0.888607	0.374214	0.746763	Lmbrd1
1343.39	0.0782085	0.0880964	0.88776	0.37467	0.746763	R3hdm2
1171.16	0.0859469	0.0970274	0.885801	0.375725	0.746763	Senp2
4331.11	0.0590758	0.066724	0.885375	0.375955	0.746763	Mapk9
3911.87	-0.0678122	0.0765945	-0.88534	0.375973	0.746763	Prkacb
5633.12	-0.173985	0.196602	-0.884961	0.376178	0.746763	Ctsl
1662.31	-0.0788162	0.0890814	-0.884766	0.376283	0.746763	Gnb4
3796.83	-0.0595757	0.0673454	-0.884629	0.376357	0.746763	Ppp3cb
1239.12	0.0849788	0.0961258	0.884038	0.376676	0.746763	Tcerg1
3109.97	-0.0644864	0.0729649	-0.883801	0.376804	0.746763	Fhl1
1608.25	-0.0806519	0.0912883	-0.883486	0.376974	0.746763	Nyap1
2326.55	-0.0801496	0.0907552	-0.883141	0.37716	0.746763	Aacs
14713.5	0.0574417	0.065044	0.88312	0.377171	0.746763	Etnk1
4875.79	-0.21891	0.248046	-0.882538	0.377486	0.746763	Cd24a
4303.34	-0.0613357	0.0695772	-0.88155	0.37802	0.746763	Dusp3
1234.83	-0.0809384	0.0918449	-0.881251	0.378182	0.746763	Ubtf
1049.35	0.0898892	0.102033	0.880982	0.378327	0.746763	Nt5c2
5477.47	0.0554806	0.0629861	0.880839	0.378405	0.746763	Ebf1
2055.08	-0.0705726	0.0801358	-0.880663	0.3785	0.746763	Rpn2
1740.27	-0.0723174	0.0821187	-0.880645	0.37851	0.746763	Leprotl1
2034.38	0.0896411	0.101802	0.880546	0.378563	0.746763	Pcmtd1
1917.54	-0.0681652	0.0774237	-0.880417	0.378634	0.746763	Rbbp4
4893.87	-0.0600039	0.0682195	-0.87957	0.379092	0.746763	Tbc1d9b
3040.69	-0.060878	0.0692145	-0.879555	0.3791	0.746763	Hprt
4821.58	-0.0627171	0.0713108	-0.879489	0.379136	0.746763	Flywch1
1264.7	0.0885431	0.100788	0.878512	0.379666	0.74717	Coro7
1431.96	-0.0849885	0.0968099	-0.877891	0.380003	0.74717	Kcnk2
1552.06	-0.074717	0.0851557	-0.877417	0.38026	0.74717	Pip4p1
3908.62	-0.0661405	0.0753816	-0.877409	0.380264	0.74717	Fkbp1b
1338.38	-0.0928624	0.105918	-0.876735	0.38063	0.747264	Sh3bp5l
2570.19	-0.199205	0.22737	-0.876128	0.380961	0.747264	Capn5
1452.05	0.0788887	0.090132	0.875257	0.381434	0.747264	Gripap1
1061.34	-0.0837414	0.0956979	-0.87506	0.381541	0.747264	Srsf11
1161.71	-0.081767	0.0934517	-0.874965	0.381593	0.747264	Grn
1927.03	0.0837281	0.0958194	0.873811	0.382221	0.747264	Washc4
3294.53	0.0627364	0.0718078	0.873672	0.382297	0.747264	Fam219a
9228.44	-0.0650533	0.0744633	-0.873629	0.38232	0.747264	Uba1
2646.72	-0.0649834	0.0744621	-0.872705	0.382824	0.747264	Ralbp1
7632.84	0.0777837	0.0891314	0.872686	0.382834	0.747264	Pcsk1
3366.57	-0.0631311	0.0723716	-0.872319	0.383035	0.747264	Rac1
1580.92	0.0777202	0.0891144	0.87214	0.383132	0.747264	Anapc1
1386.74	0.0790093	0.0906608	0.871483	0.38349	0.747264	Slc3a2
8420.07	-0.0815118	0.0935415	-0.871397	0.383537	0.747264	Hsp90aa1
2234.85	-0.0721928	0.0829492	-0.870325	0.384123	0.747956	Mat2a
1435.24	-0.0797881	0.0917221	-0.86989	0.384361	0.74797	Puf60
2811.28	0.0632102	0.0727009	0.869455	0.384598	0.747984	Ube4a
1501.97	0.073976	0.0851506	0.868767	0.384975	0.748261	Tmem87b
2183.28	-0.0725004	0.083492	-0.868351	0.385202	0.748261	Srp72
3529.21	-0.063335	0.0730691	-0.866782	0.386061	0.748412	Syt2
1115.41	-0.0844376	0.0974176	-0.866759	0.386074	0.748412	Tmed4
2887.33	0.0626194	0.072259	0.866596	0.386163	0.748412	Ptprn2
7489.85	0.072376	0.0835246	0.866524	0.386203	0.748412	Kcnab1
1263.99	-0.0791435	0.0914139	-0.865772	0.386615	0.7487	Bnip3l
1888.32	0.068427	0.0790711	0.865386	0.386827	0.7487	Usp48
1589.6	0.0773436	0.0894158	0.864988	0.387045	0.7487	Tsc2
1690.25	0.0799277	0.0924824	0.864248	0.387452	0.7487	Tmem33
1245.77	-0.0872133	0.100971	-0.863748	0.387726	0.7487	Hoxb4
1537.87	-0.0795197	0.0920973	-0.863431	0.387901	0.7487	Atg4b
6509.19	0.0607528	0.0703941	0.863039	0.388116	0.7487	Gmfb
1057.81	-0.0853179	0.0989395	-0.862324	0.388509	0.7487	Ndufa8
3179.64	0.0651147	0.0755484	0.861894	0.388746	0.7487	Mtcl1
5075.97	0.0717405	0.0833617	0.860592	0.389463	0.7487	Stat3
2502.71	0.204101	0.2372	0.860462	0.389534	0.7487	St18
4602.56	-0.0745024	0.0867759	-0.85856	0.390583	0.7487	Dpp6
3175.53	0.0835317	0.0973364	0.858175	0.390796	0.7487	Ptprf
12756.9	-0.0563877	0.0657861	-0.857137	0.391369	0.7487	Hk1
2334.86	-0.0667758	0.0779914	-0.856195	0.39189	0.7487	Limk1
5616.69	-0.0555524	0.064913	-0.855798	0.39211	0.7487	Mllt11
15650.1	-0.0479537	0.056048	-0.855582	0.392229	0.7487	Atp1b1
3434.26	0.0585635	0.0684743	0.855262	0.392406	0.7487	Madd
3719.98	0.0709585	0.082985	0.855077	0.392509	0.7487	Rabep1
1059.68	-0.0807255	0.0944148	-0.855009	0.392546	0.7487	Lsm14b
1487.99	0.0759249	0.0888238	0.854782	0.392672	0.7487	Tcf20
1270.44	0.0813329	0.0952239	0.854123	0.393037	0.7487	Ccdc6
4926.72	-0.0548555	0.064247	-0.853822	0.393204	0.7487	Copg1
3355.9	0.0597025	0.0699526	0.85347	0.393399	0.7487	Bace1
1980.66	0.0674984	0.0791223	0.85309	0.39361	0.7487	Erc2
1240.39	0.103738	0.121611	0.853029	0.393643	0.7487	Kcnq2
1479.92	-0.0765741	0.0897707	-0.852997	0.393661	0.7487	Lrrc49
1274.27	-0.0779894	0.0915064	-0.852284	0.394057	0.7487	Hsdl2
1055.21	-0.0833038	0.0977737	-0.852006	0.394211	0.7487	Psmd13
2173.27	-0.0824793	0.0968142	-0.851934	0.394251	0.7487	Capn1
2707.44	0.0627148	0.0736419	0.851618	0.394426	0.7487	Trim37
3346.69	-0.0669928	0.0786804	-0.851455	0.394517	0.7487	Pfkm
2890.64	-0.0627281	0.0736855	-0.851296	0.394605	0.7487	Morf4l2
5834.16	0.0579548	0.0681043	0.850972	0.394785	0.7487	Tmx4
4162.26	-0.0597367	0.0702	-0.850949	0.394798	0.7487	Psmd2
7716.33	-0.0656053	0.077111	-0.85079	0.394886	0.7487	Pls3
4201.59	-0.0685898	0.0806201	-0.850778	0.394893	0.7487	Nacad
1812.66	0.0780041	0.09173	0.850366	0.395121	0.7487	Dstyk
7588.96	-0.0530906	0.0624963	-0.8495	0.395603	0.748798	Ghitm
1804.37	-0.0712595	0.0839077	-0.84926	0.395736	0.748798	Hmox2
4380.3	-0.0594136	0.0700388	-0.848296	0.396273	0.748798	Tprgl
1336.81	-0.0775169	0.0914068	-0.848043	0.396414	0.748798	Fam120b
6684.92	0.0539195	0.063589	0.847937	0.396473	0.748798	Ywhaz
1461.06	0.102439	0.120832	0.847784	0.396558	0.748798	Bche
1851.22	-0.0712753	0.0841297	-0.847207	0.39688	0.748908	Sfr1
1347.99	-0.07703	0.0909605	-0.84685	0.397078	0.748908	Ldhb
3189.33	-0.0616868	0.0729056	-0.846119	0.397486	0.749242	Cct2
1301.93	0.0806834	0.0955195	0.844679	0.39829	0.750321	Tbc1d19
10723.5	0.0496518	0.0588976	0.843019	0.399218	0.750766	Slc36a1
1464.8	-0.0741057	0.0879178	-0.842898	0.399286	0.750766	Prdx6
4801.65	-0.0598446	0.0710074	-0.842795	0.399343	0.750766	Sdc3
4976.68	-0.0554638	0.0658246	-0.842601	0.399452	0.750766	Ppm1h
1351.73	0.0815903	0.097385	0.837811	0.402137	0.754836	Hnrnpm
4950.56	0.0539942	0.0644678	0.837539	0.40229	0.754836	Frmpd1
2396.7	-0.0722328	0.0862488	-0.837493	0.402315	0.754836	Grsf1
1526.69	0.0740653	0.0885771	0.836167	0.403061	0.755798	Kif3b
1171.87	-0.0924726	0.110699	-0.835348	0.403522	0.756224	Nap1l3
1730.74	0.0714336	0.0857577	0.83297	0.404861	0.757648	Ppp1r7
1996.36	0.0698971	0.0839167	0.832934	0.404882	0.757648	Lpin1
4167.09	0.0687905	0.0826058	0.832756	0.404982	0.757648	Lmbrd2
1199.4	-0.0797217	0.0958727	-0.831537	0.40567	0.757828	Armc1
5225	-0.0633051	0.0762075	-0.830694	0.406147	0.757828	Usp5
1346.29	0.0728633	0.0877765	0.8301	0.406482	0.757828	Aox1
1063.41	0.0784116	0.094546	0.829349	0.406907	0.757828	Spata13
5132.49	-0.0528689	0.0637743	-0.829	0.407105	0.757828	Rab3a
2708.9	-0.0641812	0.0774441	-0.828743	0.40725	0.757828	Rnf10
1508.81	0.0693258	0.0836815	0.828448	0.407417	0.757828	Gsk3a
2866.49	0.0606959	0.0732655	0.828438	0.407423	0.757828	Rbfox1
5647.58	0.0760455	0.0917961	0.828417	0.407434	0.757828	Tspan8
1238.14	-0.0811467	0.09798	-0.828197	0.407559	0.757828	Mindy3
1689.85	-0.0766116	0.0925216	-0.82804	0.407648	0.757828	Man1b1
3474.19	0.221427	0.267752	0.826984	0.408246	0.758168	Gm20721
2114.22	0.0703435	0.0850774	0.826817	0.408341	0.758168	Bicd2
3123.82	0.0876084	0.106064	0.825996	0.408806	0.758168	Amigo2
1512.84	-0.0729739	0.0883512	-0.825952	0.408831	0.758168	Jpt1
1756.99	-0.0931979	0.112887	-0.825586	0.409039	0.758168	Dusp26
1957.33	0.0669529	0.0811311	0.825244	0.409233	0.758168	Dcaf5
1196.88	0.0774647	0.093963	0.824417	0.409702	0.758604	Wfs1
4698.99	0.0533582	0.0647762	0.823732	0.410092	0.758892	Map7d1
3605.06	0.0554908	0.0674066	0.823225	0.41038	0.758992	Pten
5797.49	-0.0585425	0.0713757	-0.820203	0.4121	0.76174	Ppp2r5b
1756.64	-0.0727347	0.0887951	-0.81913	0.412712	0.762437	Impdh1
1065.2	0.0779694	0.0952972	0.818171	0.41326	0.7627	Clec16a
1464.47	0.0826726	0.10106	0.818056	0.413325	0.7627	Emc2
1688.72	0.0770255	0.0942741	0.817038	0.413907	0.763339	9330159F19Rik
2736.35	-0.0669434	0.0821422	-0.81497	0.41509	0.765086	Wdr6
6822.89	-0.049006	0.0603788	-0.811642	0.416997	0.767742	Pdha1
2361.68	0.0711193	0.0876252	0.81163	0.417004	0.767742	Xpo1
1490.81	-0.0712201	0.0878117	-0.811056	0.417334	0.767913	Psmd6
1192.81	-0.0924495	0.114156	-0.809854	0.418024	0.768653	Vip
2057.99	-0.0646547	0.0799285	-0.808907	0.418568	0.768653	Grb2
2964.04	-0.0585744	0.0724237	-0.808774	0.418645	0.768653	Srxn1
3810.33	0.0546228	0.0675851	0.808208	0.418971	0.768653	Fem1b
3071.46	0.0678524	0.0839965	0.8078	0.419205	0.768653	Ogt
1173.48	-0.0815231	0.100957	-0.807503	0.419377	0.768653	Faf2
1401.38	-0.070922	0.0878848	-0.806988	0.419673	0.768653	Retreg2
23457.2	-0.0508407	0.0630151	-0.806802	0.419781	0.768653	Ngfr
3818.32	0.0615769	0.0763688	0.80631	0.420064	0.768653	Nedd4l
1255.28	0.0728136	0.0903829	0.805613	0.420466	0.768653	Zdhhc8
2741.07	-0.0667634	0.082907	-0.80528	0.420658	0.768653	Nnat
4175.85	-0.0536854	0.0667069	-0.804796	0.420938	0.768653	Dnajc6
1943.39	0.0650454	0.0808266	0.804752	0.420963	0.768653	Ubqln2
3133.21	-0.0571442	0.0710512	-0.804269	0.421242	0.768653	Slc9a6
1063.04	-0.0808635	0.100553	-0.804185	0.42129	0.768653	Rtl8c
1088.51	-0.078978	0.0983786	-0.802796	0.422092	0.769684	Eif3k
2201.46	-0.0685835	0.0855124	-0.80203	0.422536	0.769877	Hdac2
16289	0.0597671	0.0745419	0.801792	0.422673	0.769877	Rab3c
18294.7	0.0568331	0.0710578	0.799815	0.423818	0.771529	Cds2
1865.09	0.0638662	0.080103	0.797301	0.425276	0.772778	Snx27
1123.71	-0.205437	0.257725	-0.797118	0.425382	0.772778	Gm765
4168.89	-0.0523568	0.0656929	-0.796993	0.425455	0.772778	Ube2d3
1669.36	-0.065705	0.0824414	-0.79699	0.425457	0.772778	Csnk1g2
1193.96	0.0733207	0.0925114	0.792558	0.428035	0.777027	Atf6
1723.33	0.0758009	0.0958865	0.790527	0.42922	0.778141	Cbarp
2432.32	-0.0622505	0.0787809	-0.790172	0.429427	0.778141	Atxn7l3
2671.2	0.0624644	0.0791325	0.789365	0.429899	0.778141	Snn
1439.23	-0.0734617	0.0930684	-0.78933	0.429919	0.778141	Ykt6
1080.2	-0.086087	0.109072	-0.789264	0.429958	0.778141	Faf1
1678.65	-0.0678492	0.0860969	-0.788057	0.430663	0.778141	Uba2
1608.17	-0.0712184	0.0904184	-0.787654	0.430899	0.778141	Vbp1
1999.73	0.0614535	0.0780369	0.787492	0.430994	0.778141	Mgat5
1325.53	0.0703999	0.089428	0.787225	0.43115	0.778141	Arel1
1932.12	-0.070663	0.0897916	-0.786967	0.431301	0.778141	Surf4
2396.22	0.0602166	0.0765233	0.786906	0.431337	0.778141	Tmem65
1690.77	0.0763124	0.0970178	0.786581	0.431527	0.778141	Atf2
5559.31	0.0513896	0.0653947	0.785838	0.431963	0.778493	Cyb5b
2041.97	0.060396	0.0769811	0.784555	0.432714	0.779414	Ipo8
1122.79	0.073526	0.0937993	0.783865	0.433119	0.779692	Cry2
1057.3	0.0779992	0.0995921	0.783186	0.433518	0.779692	Cobl
1067.7	-0.0753477	0.0962216	-0.783064	0.43359	0.779692	Aldh7a1
4323.3	0.0527481	0.0674647	0.781862	0.434296	0.780529	Ctif
2490.15	0.0581446	0.07446	0.780884	0.434871	0.78113	Xiap
1598.82	-0.0655476	0.0840409	-0.779948	0.435421	0.78122	Pip4k2a
2642.84	0.060632	0.0777568	0.779764	0.43553	0.78122	Bzw1
1031.9	0.0845268	0.108462	0.779324	0.435789	0.78122	Gpr107
1117.79	0.0809196	0.103886	0.778923	0.436025	0.78122	Dusp1
1672.96	0.0692552	0.0889724	0.778389	0.43634	0.78122	Rhou
1910.88	0.0717188	0.0921987	0.777872	0.436645	0.78122	Dhx36
8913.05	0.0705982	0.0907644	0.777819	0.436676	0.78122	Lrpprc
1478.37	0.242571	0.312138	0.777125	0.437085	0.78122	Ptov1
2470.37	-0.0562442	0.0723752	-0.777119	0.437088	0.78122	Polr2m
1065.15	0.0734406	0.0946751	0.775713	0.437919	0.78191	Tpm4
1243.04	0.0700788	0.0903486	0.775649	0.437956	0.78191	Wdfy2
1267.26	-0.29333	0.378569	-0.77484	0.438434	0.782258	Syt7
1508.56	0.0652056	0.0841902	0.774503	0.438633	0.782258	Parp4
1755.81	0.0824553	0.106543	0.773916	0.43898	0.782446	Gmps
1610.21	0.0923227	0.119481	0.772696	0.439702	0.783303	Terf1
2133.06	-0.06355	0.0823614	-0.7716	0.440351	0.784029	Dctn5
10191.7	-0.0464852	0.060391	-0.769737	0.441456	0.784579	Gdi1
2062.27	-0.0665697	0.0865102	-0.769502	0.441595	0.784579	Ndufv1
1225.2	-0.0697671	0.0907417	-0.768854	0.44198	0.784579	Nampt
10846.2	-0.0526487	0.0684915	-0.768689	0.442078	0.784579	Gng2
4037.35	-0.0539761	0.070232	-0.76854	0.442167	0.784579	Sv2a
1667.28	-0.0628943	0.0818897	-0.768036	0.442466	0.784579	Tmed10
1193.99	-0.077624	0.101123	-0.767623	0.442711	0.784579	Cnot7
1108.16	0.0756098	0.0985347	0.767342	0.442878	0.784579	Enox2
1401.16	0.0732788	0.095537	0.76702	0.44307	0.784579	Ireb2
1373.83	-0.0713631	0.0930414	-0.767004	0.443079	0.784579	Magt1
2717.9	-0.057702	0.0754005	-0.765274	0.444108	0.785972	Idh3b
1095.93	-0.0760316	0.0994989	-0.764145	0.444781	0.786734	Nedd8
1050.11	-0.0733927	0.096167	-0.76318	0.445356	0.787322	Pip4k2c
2736.44	0.0718693	0.0942267	0.762727	0.445626	0.78737	Mkln1
1561.2	0.0665098	0.0872598	0.762204	0.445938	0.787492	Evi5l
1843.98	0.0626152	0.0823152	0.760676	0.446851	0.788492	Maco1
4104.81	-0.0544469	0.071599	-0.760442	0.44699	0.788492	Glul
3267.28	-0.0629393	0.0828146	-0.760002	0.447253	0.788527	Klc2
2124.17	-0.0572207	0.0754305	-0.758589	0.448099	0.789588	Pnma2
1363.2	-0.0741761	0.0978942	-0.757717	0.448621	0.790079	B3gat3
1977.99	0.062491	0.0825632	0.756887	0.449118	0.790129	Wdr26
1387.85	0.0725325	0.095834	0.756856	0.449136	0.790129	Tug1
2008.08	-0.0601053	0.0796809	-0.754326	0.450654	0.791773	Stk25
1192.76	0.0800629	0.106267	0.753413	0.451201	0.791773	Cdc73
1323.2	-0.0728346	0.0967223	-0.753028	0.451433	0.791773	Smap2
1582.14	0.0658003	0.0873814	0.753025	0.451435	0.791773	Gns
2437.87	0.0625915	0.0831349	0.752891	0.451515	0.791773	Fam13b
1243.65	-0.0728382	0.096749	-0.752858	0.451535	0.791773	Cerk
1057.48	-0.0708846	0.0942726	-0.751911	0.452105	0.792343	Mpp1
2527.3	-0.0579039	0.0770752	-0.751266	0.452493	0.792572	Brsk1
1804.54	0.0615689	0.0820258	0.750604	0.452891	0.792572	Adar
2580.34	-0.0564645	0.0752872	-0.749988	0.453262	0.792572	Vapa
1743.06	-0.0626034	0.0835434	-0.749353	0.453645	0.792572	Trappc9
1102.9	-0.0692988	0.0924971	-0.7492	0.453736	0.792572	Psmd5
1736.63	0.18562	0.247965	0.748575	0.454113	0.792572	Flt1
6236.85	-0.073135	0.0977164	-0.748441	0.454194	0.792572	Nefh
3665.42	-0.0540168	0.0722052	-0.748102	0.454399	0.792572	Ubl3
1244.54	-0.0776879	0.103886	-0.747818	0.45457	0.792572	Gm20300
1036.3	0.0724418	0.0968941	0.747639	0.454678	0.792572	Crebl2
1292.15	0.0791019	0.105988	0.746327	0.45547	0.793526	Ppig
1441.85	0.0730909	0.0980106	0.745745	0.455822	0.793712	Stac
1144.74	-0.0695627	0.0933425	-0.745242	0.456125	0.793812	Cldnd1
1594.86	-0.0613834	0.0824646	-0.744361	0.456658	0.793812	Elp2
1063.32	-0.0733014	0.0984902	-0.74425	0.456725	0.793812	Abhd4
3256.5	-0.0537324	0.0722572	-0.743627	0.457102	0.793812	Cpeb1
1837.96	-0.059254	0.0796989	-0.743473	0.457195	0.793812	Kpna6
1034.99	0.0714873	0.0961857	0.743222	0.457347	0.793812	Sgsm2
5618.57	0.0459699	0.061967	0.741845	0.458181	0.794834	Tgoln1
1335.99	-0.0666665	0.0900361	-0.740442	0.459032	0.795884	Tmem189
28880.4	0.0581568	0.0785966	0.73994	0.459337	0.795987	Snap25
1175.54	0.0788135	0.106714	0.73855	0.46018	0.796365	Tub
1644.38	0.0612101	0.0829266	0.738124	0.460439	0.796365	Atxn2l
3258.87	0.0570163	0.0772606	0.737974	0.46053	0.796365	Purb
1110.49	-0.0755047	0.102363	-0.737617	0.460747	0.796365	Tpd52l2
1248.32	-0.0651251	0.0882981	-0.73756	0.460782	0.796365	Gfm1
1136.06	0.0891174	0.120909	0.737062	0.461084	0.796463	Gcn1
1228.21	0.0890035	0.12105	0.735265	0.462178	0.797196	Itga7
1423.66	-0.0725359	0.0986659	-0.735166	0.462238	0.797196	Rab5c
1211.63	0.0827152	0.112514	0.735154	0.462246	0.797196	Capn7
1276.29	-0.0679504	0.0925004	-0.734596	0.462586	0.797358	Cops6
1298.7	-0.069124	0.0941951	-0.733838	0.463047	0.797487	1110051M20Rik
4008.33	0.0488752	0.0666178	0.733666	0.463152	0.797487	Dpp8
5407.3	-0.0456394	0.0623923	-0.731491	0.464479	0.798963	Thra
1213.04	-0.073454	0.100422	-0.731454	0.464502	0.798963	Csnk1g3
1312.06	0.0802408	0.110011	0.729388	0.465764	0.799961	Lnpk
1332.22	-0.067875	0.0930623	-0.729351	0.465787	0.799961	Ostf1
2792.12	-0.0551989	0.0756881	-0.729294	0.465822	0.799961	Adora1
4922.52	-0.0482012	0.0661649	-0.728501	0.466307	0.800079	Hspa9
9101.48	-0.0488418	0.0670778	-0.728137	0.46653	0.800079	Tcf25
1155.73	-0.191266	0.262752	-0.727934	0.466654	0.800079	Gpx3
7467.83	-0.0501007	0.068897	-0.727183	0.467114	0.800079	Elavl4
2749.27	-0.0586888	0.0807089	-0.727166	0.467124	0.800079	Flii
1671.73	-0.0609399	0.0838702	-0.726598	0.467472	0.800253	Snx6
1057.36	0.0772182	0.106404	0.725708	0.468017	0.800764	Ski
5379.11	-0.0508187	0.0701403	-0.724529	0.468741	0.801193	Cntn2
1286.65	-0.0646425	0.0892673	-0.724146	0.468976	0.801193	Poglut1
1764.64	-0.0647928	0.0894814	-0.724093	0.469009	0.801193	Sh3glb2
1145.05	0.0695067	0.096095	0.723313	0.469488	0.801588	Tut7
5620.31	-0.0581857	0.0805161	-0.722659	0.469889	0.801852	Ddb1
1057.31	0.07801	0.108164	0.72122	0.470774	0.80294	Socs5
3610.79	-0.0510912	0.0709643	-0.719957	0.471551	0.803843	Ckb
13092.9	-0.0417718	0.0581496	-0.718351	0.472541	0.804687	Zwint
1690.66	0.0892906	0.1243	0.718348	0.472543	0.804687	Sorl1
1106.72	-0.0701197	0.0977579	-0.717279	0.473202	0.805057	Rassf5
4243.82	0.0544421	0.0759102	0.717191	0.473256	0.805057	Prpf8
5371.77	-0.0467651	0.0652988	-0.716171	0.473886	0.805208	Sdf4
4374.74	-0.0494861	0.0691072	-0.716078	0.473943	0.805208	Sh3bgrl3
6877.61	0.0465534	0.0650331	0.715841	0.47409	0.805208	Mtmr6
1403.59	-0.0651521	0.0910884	-0.715262	0.474447	0.805393	Ddx39b
2193.56	0.0691496	0.096904	0.713589	0.475481	0.806727	Abce1
2241.03	0.0530717	0.0745409	0.711981	0.476476	0.807992	Smim14
1622.88	0.0695921	0.0978615	0.711129	0.477005	0.808365	Adam9
1930.34	0.0573201	0.0806391	0.710822	0.477194	0.808365	Kpna4
1398.58	-0.0622649	0.0881171	-0.706616	0.479805	0.812363	Dpf2
2033.32	-0.0543662	0.0770217	-0.705856	0.480278	0.812739	Nap1l4
5473.73	-0.0518435	0.0735355	-0.705013	0.480802	0.813202	Dctn2
1348.59	0.0665049	0.0943864	0.704602	0.481058	0.813211	Ubfd1
1131.57	-0.0670209	0.0952745	-0.703451	0.481775	0.813649	Osbpl2
2297.93	-0.0639772	0.0910033	-0.70302	0.482043	0.813649	Supt5
1386.11	0.0658827	0.0937194	0.702978	0.48207	0.813649	Camta2
6845.08	-0.0560453	0.0798299	-0.702059	0.482642	0.814192	Celf4
1766.56	-0.0580991	0.0828542	-0.701221	0.483165	0.814213	Ppp2r2a
6625.22	-0.0458317	0.0653669	-0.701146	0.483212	0.814213	Msn
1307.07	0.0626682	0.0895126	0.700105	0.483862	0.814213	Itch
1118.3	-0.0693063	0.0990004	-0.700061	0.483889	0.814213	Egln2
1843.04	0.0586579	0.0837936	0.700028	0.48391	0.814213	Golga3
1195.43	0.071389	0.102078	0.699359	0.484328	0.814433	Rfc1
3169.97	-0.0527161	0.0754148	-0.699015	0.484543	0.814433	Ppp3r1
1181.57	-0.0650951	0.093337	-0.69742	0.48554	0.815687	Grb10
1707.83	-0.0599353	0.0860834	-0.696247	0.486274	0.816398	Chrnb2
3551.03	0.0572035	0.082196	0.69594	0.486466	0.816398	Megf8
3347.05	0.0704237	0.101485	0.693934	0.487723	0.818084	Evi5
2218.97	-0.0538934	0.0777234	-0.693401	0.488058	0.818173	Bcl2l2
3265.02	0.0511671	0.0738293	0.693046	0.488281	0.818173	Arhgap28
4785.86	0.0452323	0.0653742	0.691899	0.489001	0.818267	Tsc22d1
2249.36	0.0574846	0.0830938	0.691805	0.48906	0.818267	Car10
2760.95	-0.0605067	0.087469	-0.691751	0.489094	0.818267	Sacm1l
1358.5	0.0690507	0.0999421	0.690907	0.489624	0.818516	Tef
1822.21	0.0553701	0.080164	0.690711	0.489747	0.818516	Gna12
1209.39	-0.0639961	0.0927517	-0.689972	0.490212	0.81871	Gnb5
1705.36	-0.0653508	0.0947691	-0.689579	0.490459	0.81871	Diras1
1602.24	0.080535	0.116832	0.689323	0.49062	0.81871	Vgf
1647.43	0.0589951	0.0857435	0.688042	0.491427	0.819207	Ppp2r5e
2376.23	0.0639004	0.0928792	0.687994	0.491456	0.819207	Zdhhc21
3481.04	-0.0584888	0.0850789	-0.687466	0.491789	0.819207	Psip1
2065.29	-0.0575155	0.08369	-0.687245	0.491928	0.819207	Mtmr4
1590.45	-0.0606702	0.0884634	-0.685822	0.492825	0.82028	Stau1
1114.92	-0.0709903	0.103714	-0.684482	0.493671	0.820902	Galnt9
6229.55	-0.0466085	0.0680985	-0.684427	0.493706	0.820902	Gaa
2214.02	0.0630309	0.0922108	0.683552	0.494258	0.821206	Nrxn2
2191.24	0.0584114	0.0856213	0.682206	0.495109	0.821206	Snrnp200
4224.74	-0.0441705	0.064752	-0.682148	0.495146	0.821206	Kcna6
1730.15	0.076573	0.112276	0.682009	0.495234	0.821206	Arhgap12
1712.55	-0.056717	0.083163	-0.681998	0.49524	0.821206	Zc2hc1a
7045.5	0.0443621	0.0650724	0.681734	0.495407	0.821206	Edil3
5969.94	-0.0423374	0.0621871	-0.680806	0.495994	0.82125	Sqle
1569.07	-0.0584977	0.0859447	-0.680643	0.496097	0.82125	Ube2l3
2305.96	-0.0533766	0.0784418	-0.680462	0.496212	0.82125	Bex3
1811.86	-0.0730003	0.107339	-0.680092	0.496446	0.82125	Tuba1b
2678.02	0.0490922	0.0722322	0.679645	0.49673	0.8213	Usp7
4317.82	0.0491433	0.0724692	0.678127	0.497691	0.822066	Abca7
1213.79	0.061914	0.0913033	0.678113	0.4977	0.822066	Rubcn
1983.54	0.0576154	0.0850396	0.677512	0.498081	0.822278	Smad2
1102.67	0.0645642	0.0954323	0.676545	0.498695	0.822872	Ttc33
1869.84	0.0644629	0.0954203	0.675568	0.499315	0.823082	Fbxo31
1048.66	-0.0756724	0.112063	-0.675267	0.499506	0.823082	Tox4
3879.44	-0.0470827	0.0697371	-0.675145	0.499584	0.823082	Coro2a
1174.73	-0.0620592	0.0919811	-0.674695	0.49987	0.823135	Mpnd
2923.57	0.0541097	0.0805346	0.671882	0.501659	0.825663	Atp1a2
34541.4	0.129795	0.193661	0.670219	0.502718	0.826708	Gm42418
1139.18	0.0611585	0.0912698	0.670085	0.502803	0.826708	Exoc1
1497.17	-0.0735066	0.109799	-0.669462	0.503201	0.826942	Icmt
8415.06	-0.0475307	0.0711223	-0.668295	0.503945	0.827367	Pygb
1773.67	-0.0545935	0.0816954	-0.668257	0.50397	0.827367	Nipsnap1
1091.93	0.0731804	0.10962	0.66758	0.504402	0.827491	Ubac1
1129.41	0.0625469	0.0937258	0.66734	0.504555	0.827491	Ube2h
1720.77	-0.0614553	0.0922652	-0.666072	0.505365	0.8284	Tmem64
13818	0.0381543	0.0574711	0.663888	0.506762	0.830271	Stxbp1
1241.58	0.0616652	0.0929788	0.663217	0.507191	0.830432	Tacc1
3749.17	0.0454943	0.0686257	0.662934	0.507373	0.830432	Prkar2a
2179.34	0.0626139	0.0946444	0.661571	0.508247	0.831118	Tmem184c
2355.08	-0.0529093	0.0799862	-0.661481	0.508304	0.831118	Rusc2
1672.39	-0.0600636	0.0910116	-0.659956	0.509282	0.832298	Sec61a1
1362.41	0.0852342	0.129748	0.656923	0.511231	0.834699	Kcnt1
13946.9	-0.0413069	0.0629181	-0.656518	0.511491	0.834699	Eef1a1
1473.24	0.0576829	0.0879662	0.65574	0.511992	0.834699	Prkaa2
2970.99	0.051005	0.0777894	0.655681	0.512029	0.834699	Caskin1
1967.07	-0.0509001	0.0776585	-0.655435	0.512188	0.834699	Prmt2
2337.6	-0.0665481	0.101559	-0.655268	0.512295	0.834699	Cacybp
1447.12	0.0578498	0.0883996	0.654413	0.512846	0.834964	Kras
1658.22	0.0581922	0.0889495	0.654216	0.512973	0.834964	Osbpl9
1736.47	-0.0525442	0.080537	-0.652423	0.514128	0.83636	Tmem50b
5077.09	0.0416928	0.0639377	0.652086	0.514346	0.83636	Zyg11b
10159.4	0.0408105	0.0626267	0.651646	0.51463	0.836402	Cadm3
1149.64	-0.0687821	0.105626	-0.651185	0.514927	0.836466	Stub1
1780.28	0.0579807	0.0892321	0.649774	0.515838	0.836669	Fbxl16
1648.27	0.0527825	0.0813046	0.649194	0.516213	0.836669	Nipa1
7497.71	-0.0426577	0.065714	-0.649141	0.516247	0.836669	Esyt1
1132.81	-0.0602322	0.0928178	-0.64893	0.516384	0.836669	Rab11fip3
3505.3	0.0452419	0.0697481	0.648646	0.516567	0.836669	Mapre1
1250.96	0.0604948	0.0933652	0.647937	0.517026	0.836669	Cse1l
10392.8	-0.0410841	0.063455	-0.647453	0.517339	0.836669	Vat1
6749.04	-0.0413674	0.0639024	-0.647354	0.517403	0.836669	Rcan3
1289.8	-0.0569596	0.0880306	-0.647043	0.517604	0.836669	Tmem127
[truncated: 53,336 more rows]

## Sheet: OVA vs naive. All DEGs
baseMean	log2FoldChange	lfcSE	stat	pvalue	padj	gene
3203.87	0.601545	0.0985056	6.10672	1.01702063320218e-09	1.37287615275962e-05	Cntn1
2376.03	0.53531	0.104524	5.12138	3.03303724059911e-07	0.00204715	Thsd7a
1306.99	0.604001	0.126111	4.78943	1.67253479618502e-06	0.00752585	Olfm3
335.201	0.965408	0.210023	4.59667	4.29289075710189e-06	0.0144874	Gabra1
145.734	1.43969	0.339672	4.23847	2.25052630912558e-05	0.0607597	Gabrb2
606.666	0.5871	0.139911	4.19624	2.71387107596593e-05	0.0610576	1110032F04Rik
543.445	0.839334	0.202755	4.13964	3.47853414935312e-05	0.067081	Pappa2
206.43	0.911512	0.224016	4.06896	4.72239277653197e-05	0.0796845	Gabrg1
506.871	0.652242	0.164184	3.97263	7.10829400692839e-05	0.0988359	Piezo1
50.1005	2.2991	0.580127	3.96309	7.39849915733992e-05	0.0988359	Edn3
214.864	1.09696	0.27822	3.94279	8.05389339519422e-05	0.0988359	Gpr65
191.898	1.23227	0.318906	3.86405	0.000111523	0.125454	Npy1r
371.727	0.847363	0.222524	3.80797	0.000140115	0.145493	Pcdh11x
174.411	1.00982	0.267973	3.76836	0.000164324	0.158444	Col24a1
316.516	-0.66841	0.179341	-3.72703	0.000193747	0.174359	Gal
1682.45	0.405648	0.113146	3.58517	0.000336856	0.284201	Lix1
536.776	0.57435	0.162133	3.54245	0.00039643	0.307577	Sdc4
63.2361	1.73508	0.491041	3.53348	0.000410134	0.307577	Ptprb
1299.7	0.406886	0.116154	3.50299	0.000460068	0.326867	Dock4
892.031	0.539013	0.160393	3.36058	0.000777799	0.499315	Ntrk3
292.024	0.658819	0.19705	3.3434	0.000827582	0.499315	Man1a
105.716	1.06547	0.319211	3.33783	0.000844354	0.499315	S100a16
951.057	0.537379	0.161398	3.32952	0.000869966	0.499315	P2ry1
20.8816	2.92352	0.879549	3.32388	0.000887736	0.499315	Cldn5
5358.72	0.293415	0.0887937	3.30445	0.000951621	0.513837	Nacc2
673.663	0.590434	0.180596	3.26937	0.00107789	0.559631	Cdh6
74.2983	1.12883	0.358883	3.14541	0.00165856	0.818073	Adgrl4
714.714	0.5856	0.186573	3.13872	0.00169687	0.818073	Lrp1b
419.617	0.599094	0.194246	3.0842	0.00204098	0.939133	Gabra2
260.772	0.622511	0.202275	3.07755	0.00208712	0.939133	Ntsr1
3680.56	0.296741	0.0972014	3.05285	0.0022668	0.972826	Kcna2
7283.27	-0.249991	0.0820266	-3.04768	0.00230613	0.972826	Chrna3
87.6119	1.03092	0.341244	3.02105	0.00251898	0.999924	Lypd6
160.932	0.75918	0.252013	3.01246	0.00259136	0.999924	Tnfrsf1a
46.6747	1.5385	0.511323	3.00886	0.00262227	0.999924	Ecel1
1524.51	0.385219	0.12907	2.98457	0.00283976	0.999924	Lrrn1
4939.52	0.278938	0.0935059	2.9831	0.00285344	0.999924	Alcam
1315.61	0.383362	0.128721	2.97823	0.00289917	0.999924	Tenm2
1702	0.314369	0.106411	2.9543	0.00313378	0.999924	Scpep1
567.053	0.539921	0.183755	2.93827	0.00330054	0.999924	Mdga1
395.426	0.510919	0.17631	2.89785	0.00375728	0.999924	Kcna1
502.754	-0.572962	0.199096	-2.87782	0.00400435	0.999924	Slc4a11
27445.6	0.281814	0.0982008	2.86977	0.00410766	0.999924	Dst
5057.05	-0.25817	0.0903375	-2.85784	0.00426534	0.999924	Atp1b3
16.6128	2.37722	0.835269	2.84605	0.00442655	0.999924	Dok2
5825.48	0.244196	0.0865646	2.82097	0.00478794	0.999924	Susd2
585.776	0.397239	0.140932	2.81866	0.00482246	0.999924	Ndst3
44.2774	1.91775	0.681482	2.81408	0.00489166	0.999924	Gbp9
1035.49	-0.38494	0.137139	-2.80693	0.00500157	0.999924	Hspa1b
899.098	0.402099	0.143462	2.80282	0.00506583	0.999924	Nr4a1
20.3194	2.38603	0.852565	2.79865	0.00513172	0.999924	Cyp26a1
1369.48	0.326856	0.117143	2.79023	0.00526701	0.999924	Scn8a
30.8857	1.59165	0.573151	2.77702	0.00548595	0.999924	Acvrl1
60.4976	1.42326	0.512751	2.77573	0.00550779	0.999924	Ggt5
73.2861	1.17849	0.425222	2.77146	0.00558052	0.999924	Apobec3
390.18	-0.504964	0.182879	-2.7612	0.00575901	0.999924	Rnf112
727.798	-0.383559	0.142463	-2.69234	0.00709531	0.999924	Myl1
2939.24	-0.292888	0.108795	-2.69212	0.00709999	0.999924	Chrnb4
174.797	0.727642	0.271055	2.68448	0.00726435	0.999924	Kcng1
200.273	0.680318	0.255534	2.66234	0.00775999	0.999924	Myo1a
305.279	0.497343	0.187066	2.65865	0.00784554	0.999924	Pcdh7
96.6426	0.877203	0.330024	2.658	0.00786055	0.999924	Tafa2
536.123	0.430026	0.162342	2.64888	0.00807584	0.999924	Galc
45517.3	0.222512	0.0843527	2.63787	0.00834278	0.999924	Prune2
2628.87	0.26478	0.100527	2.63392	0.00844047	0.999924	Psd3
294.979	-0.492987	0.187829	-2.62466	0.00867357	0.999924	Kcnn3
2160.75	0.297189	0.114254	2.60112	0.00929202	0.999924	Chrnb3
298.597	-0.568229	0.219115	-2.59329	0.00950613	0.999924	Ina
1845.71	0.351922	0.135833	2.59084	0.00957417	0.999924	Timp3
948.929	-0.331594	0.128712	-2.57625	0.00998784	0.999924	Nhlh2
58.67	1.08461	0.42115	2.57535	0.0100138	0.999924	Slc17a7
1874.77	0.358336	0.13939	2.57075	0.0101478	0.999924	Sorl1
186.305	0.670036	0.260942	2.56776	0.0102358	0.999924	Gm7271
31.9743	1.68473	0.657048	2.56409	0.0103447	0.999924	Gpr151
93.4883	0.85425	0.333557	2.56103	0.0104362	0.999924	Zfp36l2
4341.76	0.25405	0.099223	2.5604	0.0104553	0.999924	Prkar2b
18.5523	1.9214	0.752088	2.55476	0.0106262	0.999924	Ly6a
751.351	0.346007	0.135966	2.5448	0.010934	0.999924	Flrt3
811.959	0.393484	0.155118	2.53667	0.0111911	0.999924	Prkcb
5080	0.254927	0.100758	2.5301	0.0114032	0.999924	Cntnap2
73.8271	-1.05911	0.419382	-2.52542	0.0115562	0.999924	AI480526
29.8137	-1.6804	0.666918	-2.51964	0.0117474	0.999924	Il31ra
7598.84	0.262049	0.104184	2.51526	0.0118944	0.999924	Scn7a
52.6969	1.2354	0.492505	2.50841	0.0121275	0.999924	Ramp2
1222.18	0.29954	0.119781	2.50073	0.0123938	0.999924	Spon1
29.3335	1.70953	0.686994	2.48842	0.0128312	0.999924	Slco1a4
106.699	0.775788	0.313595	2.47386	0.0133664	0.999924	Neto1
19.0595	2.17826	0.880834	2.47295	0.0134001	0.999924	Arhgap45
179.375	-0.624009	0.254666	-2.45031	0.0142735	0.999924	Npas1
359.412	0.467295	0.190724	2.45011	0.0142811	0.999924	Notch1
521.287	0.388201	0.158827	2.44418	0.0145183	0.999924	Brinp1
1066.15	-0.361299	0.147835	-2.44394	0.014528	0.999924	Gpx3
211.061	0.646324	0.265168	2.43742	0.0147927	0.999924	Crim1
1033.46	-0.355505	0.145979	-2.43531	0.0148791	0.999924	Uts2b
550.491	0.47771	0.196618	2.42964	0.0151137	0.999924	Hcn1
180.441	-0.613812	0.253352	-2.42277	0.0154028	0.999924	Rps6kb2
5597.8	0.245008	0.10147	2.4146	0.0157527	0.999924	Ank3
547.505	0.369637	0.153204	2.41271	0.0158344	0.999924	Zfp423
21.1177	1.69933	0.705046	2.41024	0.0159419	0.999924	C1ra
3956.35	0.21244	0.0881463	2.41008	0.015949	0.999924	Hs6st1
709.004	0.332074	0.137918	2.40776	0.0160509	0.999924	St8sia1
1677.65	0.2519	0.104685	2.40626	0.0161168	0.999924	Tle1
209.028	0.553765	0.230922	2.39806	0.0164821	0.999924	Aldh1a3
409.055	0.422947	0.176372	2.39804	0.0164831	0.999924	Kctd16
124.94	0.720419	0.30179	2.38715	0.0169794	0.999924	Aspa
203.521	0.557835	0.233994	2.38397	0.0171268	0.999924	Ccne1
550.511	0.387915	0.162724	2.38388	0.017131	0.999924	Ryr2
423.843	0.437458	0.183617	2.38245	0.0171979	0.999924	Nfia
389.92	-0.393276	0.165226	-2.38024	0.0173014	0.999924	Tpt1
373.796	0.441788	0.186771	2.3654	0.0180108	0.999924	Dusp6
761.012	0.352888	0.14937	2.36251	0.0181518	0.999924	Nrxn3
1345.54	0.271354	0.115113	2.35729	0.0184087	0.999924	Gpr158
21.635	1.83099	0.778015	2.35341	0.0186021	0.999924	Col9a3
213.837	0.57336	0.243842	2.35136	0.0187048	0.999924	Gas2l3
2883.1	0.208089	0.0885253	2.35062	0.0187423	0.999924	Luzp2
763.088	0.458462	0.195192	2.34877	0.0188356	0.999924	Arap2
18.5684	1.89911	0.813486	2.33453	0.0195681	0.999924	Pnldc1
29.1498	1.69683	0.732801	2.31554	0.0205833	0.999924	Pou6f2
6961.12	0.207406	0.0895807	2.31529	0.0205968	0.999924	Herc1
1598.32	-0.358828	0.155307	-2.31044	0.0208638	0.999924	Ide
65.1983	0.887154	0.384535	2.30708	0.0210503	0.999924	Klf2
1373.39	-0.282041	0.122297	-2.3062	0.0210994	0.999924	Zcchc12
3453.46	0.222588	0.0966912	2.30205	0.0213324	0.999924	Uhrf1bp1l
2703.73	0.234779	0.10202	2.30131	0.0213742	0.999924	Utrn
706.583	0.397005	0.172613	2.29997	0.0214498	0.999924	Cdr1os
384.173	0.398169	0.174156	2.28627	0.0222382	0.999924	Kcnv1
2166.63	-0.326713	0.142941	-2.28565	0.0222747	0.999924	Eno1
23.2124	1.96121	0.86063	2.27881	0.0226782	0.999924	Gm14296
495.668	-1.08977	0.478593	-2.27703	0.0227842	0.999924	Wdfy1
627.922	0.378535	0.166318	2.27598	0.0228475	0.999924	Ednra
26.3016	1.59956	0.703398	2.27404	0.0229634	0.999924	Cyyr1
102.45	0.696114	0.306919	2.26807	0.023325	0.999924	Shh
407.704	0.397639	0.175344	2.26777	0.0233435	0.999924	Gon4l
732.424	0.372215	0.164186	2.26704	0.0233879	0.999924	Plekhd1
576.45	0.374643	0.16542	2.2648	0.0235251	0.999924	Ifit1
1565.78	-0.241591	0.106714	-2.26391	0.0235798	0.999924	Hs3st4
1502.89	0.263531	0.116917	2.254	0.0241961	0.999924	Nebl
3154.49	0.232637	0.103728	2.24277	0.0249119	0.999924	Htt
277.619	-0.429947	0.191918	-2.24027	0.0250736	0.999924	Ccdc117
6791.36	-0.195009	0.0875492	-2.22742	0.0259193	0.999924	Hsph1
97.5356	-0.878573	0.395461	-2.22164	0.0263075	0.999924	Hddc3
6620.02	-0.228461	0.102846	-2.22139	0.0263246	0.999924	Tmc3
285.607	0.419239	0.189365	2.21392	0.026834	0.999924	C4b
85.8736	0.730741	0.33043	2.21148	0.0270025	0.999924	Chodl
69.6491	0.970038	0.439996	2.20465	0.0274784	0.999924	Pde7b
16.7952	1.8249	0.827929	2.20417	0.0275121	0.999924	Hapln4
2814.15	-0.229394	0.104479	-2.1956	0.0281204	0.999924	Lxn
3873.97	0.252426	0.115203	2.19114	0.0284418	0.999924	Ahnak2
1308.65	0.260694	0.119022	2.19031	0.0285019	0.999924	Kcnq2
1092.24	-0.259864	0.118838	-2.18671	0.0287635	0.999924	Drp2
151.402	-0.597907	0.274099	-2.18135	0.0291574	0.999924	Zfp64
35.0204	-1.19272	0.548621	-2.17403	0.0297025	0.999924	Omp
72.3396	0.825908	0.379908	2.17397	0.0297077	0.999924	Rnf207
456.597	0.348262	0.160305	2.17249	0.0298188	0.999924	Clstn2
5869.82	0.183547	0.0845313	2.17134	0.0299051	0.999924	Hectd4
932.178	0.300485	0.138565	2.16855	0.0301167	0.999924	Fam126b
670.148	0.350355	0.16186	2.16456	0.0304216	0.999924	Casz1
55.9376	-1.04853	0.485194	-2.16104	0.0306919	0.999924	Islr2
46.828	-1.37108	0.634966	-2.1593	0.030827	0.999924	Hoxd1
3286.36	0.197358	0.0915419	2.15593	0.0310891	0.999924	Lhfpl4
1077.74	0.280969	0.130334	2.15576	0.0311024	0.999924	Zfhx3
567.142	0.373503	0.173352	2.1546	0.0311935	0.999924	Itih5
5468.34	0.236196	0.109665	2.1538	0.0312556	0.999924	Syne1
7288.39	-0.213174	0.0991648	-2.14969	0.0315797	0.999924	Crtac1
302.14	-0.410736	0.191289	-2.1472	0.0317773	0.999924	Lmf1
3638.77	0.191529	0.0892584	2.14579	0.0318899	0.999924	Atp2b1
97.9131	-0.741356	0.345538	-2.14551	0.0319118	0.999924	Wnt4
1281.02	0.24036	0.112122	2.14373	0.0320545	0.999924	Plch1
371.996	0.384104	0.179181	2.14367	0.0320597	0.999924	Jcad
306.732	0.422237	0.197063	2.14265	0.0321412	0.999924	Sox10
10466.4	0.206697	0.0964834	2.1423	0.0321691	0.999924	Plec
62.2333	0.898601	0.419805	2.14052	0.0323125	0.999924	Htr1d
865.764	-0.329961	0.154325	-2.13809	0.0325094	0.999924	Ephx1
1132.68	0.299457	0.14013	2.13699	0.0325987	0.999924	Lrp1
51.911	-0.896502	0.420867	-2.13013	0.0331607	0.999924	Hgh1
1378.66	0.253464	0.119129	2.12764	0.0333666	0.999924	Sptb
1872.78	-0.205235	0.0967542	-2.1212	0.0339049	0.999924	Fam89a
699.91	0.294586	0.138897	2.1209	0.0339306	0.999924	Lmtk2
85.56	0.809421	0.382897	2.11394	0.0345204	0.999924	Ripor2
3622.22	0.210167	0.0996537	2.10897	0.0349471	0.999924	Mbnl1
319.925	0.390754	0.186135	2.0993	0.0357902	0.999924	Tmtc2
759.704	0.336406	0.1605	2.09599	0.0360829	0.999924	Plcb1
69.1053	0.888971	0.424278	2.09526	0.0361481	0.999924	6820431F20Rik
55.0276	1.09198	0.522558	2.08968	0.0366464	0.999924	Pecam1
669.371	0.363234	0.173825	2.08965	0.0366491	0.999924	Zfhx4
79.2855	0.770821	0.369579	2.08567	0.0370084	0.999924	Tgm2
187.377	0.522338	0.250726	2.08331	0.0372233	0.999924	Sel1l3
1184.68	0.262185	0.125909	2.08234	0.0373114	0.999924	Mdn1
42.4965	0.969382	0.465764	2.08127	0.0374089	0.999924	B9d1
1321.73	0.291799	0.140297	2.07987	0.0375378	0.999924	Itga7
2620.22	-0.25533	0.122931	-2.07702	0.0378	0.999924	Kcnk3
1023.78	0.292434	0.14086	2.07606	0.0378886	0.999924	Itgb8
2833.55	0.284201	0.13732	2.06963	0.0384873	0.999924	Dcdc2a
86.4359	0.765339	0.370038	2.06827	0.0386148	0.999924	Ptgfr
186.589	0.485772	0.235117	2.06609	0.0388204	0.999924	Tbp
785.407	0.311765	0.151	2.06466	0.0389549	0.999924	Kcnh7
43.5804	1.3018	0.631151	2.06258	0.0391522	0.999924	Slfn5
80.9288	-0.727251	0.352689	-2.06202	0.0392062	0.999924	Nell2
224.637	0.501831	0.243438	2.06143	0.0392617	0.999924	Osbp2
66.8791	-0.990409	0.480893	-2.05952	0.0394446	0.999924	Kcnmb1
29.6337	1.218	0.592451	2.05587	0.0397954	0.999924	Sgcz
56.2415	-1.03657	0.505366	-2.05113	0.0402546	0.999924	Sstr2
17.0521	1.54184	0.752426	2.04916	0.0404466	0.999924	Hlf
72.7333	0.783968	0.382963	2.04711	0.040647	0.999924	Thap6
329.4	-0.365808	0.178796	-2.04595	0.0407616	0.999924	Cstf2t
583.218	-0.340616	0.16682	-2.04183	0.0411688	0.999924	Arhgef3
47.9771	0.896008	0.439159	2.04028	0.0413225	0.999924	Gbp5
692.463	0.331983	0.162793	2.0393	0.0414205	0.999924	Mdfic
302.677	-0.401785	0.19707	-2.03879	0.0414709	0.999924	Map3k3
423.641	0.34052	0.167442	2.03366	0.0419857	0.999924	C030017B01Rik
981.522	0.259469	0.127701	2.03185	0.0421688	0.999924	Ttyh1
4928.8	0.180266	0.0888731	2.02836	0.042524	0.999924	Hmbox1
318.122	0.373291	0.184457	2.02373	0.0429981	0.999924	Cdk19
91.3927	0.687296	0.339686	2.02333	0.0430391	0.999924	Gpr119
527.889	0.334385	0.165618	2.01901	0.0434858	0.999924	Ust
726.106	-0.285146	0.141234	-2.01897	0.0434907	0.999924	Txndc9
1671.53	-0.241976	0.119881	-2.01847	0.0435428	0.999924	Itm2a
42.6144	0.956068	0.473708	2.01826	0.0435638	0.999924	9530053A07Rik
2929.25	0.197205	0.0977245	2.01797	0.0435948	0.999924	Slc38a2
1014.37	0.250252	0.124156	2.01562	0.0438392	0.999924	Tmem47
157.959	0.506379	0.251393	2.01429	0.0439789	0.999924	Slc18a2
715.637	-0.325047	0.161397	-2.01396	0.0440141	0.999924	Kcnk9
129.025	0.62149	0.309615	2.0073	0.0447175	0.999924	Sorcs2
398.2	0.353395	0.176092	2.00688	0.044762	0.999924	Sav1
199.959	0.482738	0.2407	2.00555	0.0449039	0.999924	Car2
878.066	-0.253675	0.126511	-2.00516	0.0449459	0.999924	Ubqln4
519.112	0.30139	0.150507	2.0025	0.0452306	0.999924	Decr1
221.313	0.441821	0.22089	2.00018	0.0454805	0.999924	Cavin1
704.094	-0.283799	0.142094	-1.99726	0.0457975	0.999924	Cthrc1
2200.89	0.200351	0.10035	1.99653	0.0458761	0.999924	S100b
266.812	0.406519	0.203852	1.99419	0.0461313	0.999924	Sft2d2
57.6519	0.823084	0.413177	1.99209	0.0463616	0.999924	Kcns1
6967.11	0.19187	0.096415	1.99004	0.0465864	0.999924	Chl1
2232.56	-0.186668	0.093874	-1.9885	0.0467567	0.999924	Actr3
462.632	-0.342728	0.172357	-1.98848	0.0467583	0.999924	Vmn1r85
293.983	0.436511	0.220399	1.98055	0.0476422	0.999924	Rassf4
39.1586	-0.960701	0.485295	-1.97962	0.0477459	0.999924	Gm29773
930.831	-0.247479	0.125087	-1.97845	0.0478778	0.999924	Rps15a
569.263	0.341505	0.17289	1.97528	0.0482367	0.999924	Ccdc141
381.5	0.369682	0.187253	1.97424	0.0483545	0.999924	Pcolce2
203.141	-0.457009	0.2315	-1.97412	0.0483675	0.999924	Crtap
1201.52	0.28192	0.142811	1.97408	0.048373	0.999924	Dusp1
1224.98	0.220225	0.111597	1.97339	0.0484513	0.999924	Pcdh10
2158.23	0.204656	0.103747	1.97264	0.0485362	0.999924	Nup93
861.897	0.247979	0.12601	1.96792	0.0490767	0.999924	Palm3
29.9133	1.18207	0.601009	1.96682	0.0492044	0.999924	9330162012Rik
3045.86	0.221129	0.112514	1.96535	0.0493743	0.999924	Birc6
3277.79	0.194376	0.099359	1.9563	0.0504294	0.999924	Pcsk2
396.741	0.354274	0.18132	1.95386	0.0507173	0.999924	Arxes2
892.689	-0.251653	0.129054	-1.94998	0.0511784	0.999924	Hpcal4
841.821	0.258214	0.13261	1.94717	0.0515138	0.999924	Cemip2
442.86	0.318651	0.16389	1.9443	0.0518598	0.999924	Ralgapa2
34172.7	0.200251	0.103096	1.94237	0.0520926	0.999924	Dync1h1
22.3379	-1.26924	0.653458	-1.94234	0.0520956	0.999924	Nos1ap
1666.05	-0.24146	0.124423	-1.94063	0.0523027	0.999924	Slc5a7
4791.97	0.162312	0.0836418	1.94056	0.0523114	0.999924	Ablim1
244.211	-0.39129	0.201704	-1.93992	0.0523897	0.999924	Xrcc6
184.808	0.517481	0.267904	1.93159	0.0534103	0.999924	Fam107a
1444.41	0.208977	0.108277	1.93002	0.0536045	0.999924	Slc3a2
962.602	-0.226804	0.117763	-1.92595	0.054111	0.999924	Rpl7
408.427	0.395801	0.205782	1.9234	0.05443	0.999924	Ptgfrn
6990.7	0.165049	0.0858528	1.92246	0.054548	0.999924	Arfgef3
357.421	-0.420503	0.219184	-1.91849	0.0550484	0.999924	C1ql2
33.2941	1.32729	0.692153	1.91763	0.0551582	0.999924	Cdh5
2518.98	-0.240116	0.125442	-1.91416	0.0556001	0.999924	Nnat
113.538	0.627719	0.328135	1.91299	0.0557496	0.999924	Gm26658
159.86	-0.588365	0.308119	-1.90954	0.0561927	0.999924	Apopt1
175.264	-0.572774	0.300353	-1.90701	0.0565198	0.999924	Myh11
789.051	0.242441	0.127489	1.90167	0.0572144	0.999924	Prkdc
2620.98	-0.213646	0.112368	-1.90131	0.057262	0.999924	Hdac11
54.1257	1.01077	0.531696	1.90102	0.0572988	0.999924	Lum
280.381	0.400592	0.210732	1.90095	0.0573079	0.999924	Tifa
57.7954	0.868307	0.457049	1.89981	0.057458	0.999924	Itpr2
333.671	-0.354284	0.186738	-1.89723	0.0577981	0.999924	Rfc2
140.399	-0.530276	0.27965	-1.89621	0.057932	0.999924	Tafa4
168.083	0.472874	0.249615	1.89441	0.05817	0.999924	Rrp1b
824.931	-0.29072	0.153637	-1.89225	0.0584579	0.999924	Mt3
1621.15	0.219469	0.116001	1.89195	0.0584976	0.999924	Akap13
448.564	0.300238	0.158863	1.88992	0.0587692	0.999924	Ell2
554.644	0.312839	0.165587	1.88927	0.0588561	0.999924	Kcnk18
723.127	0.297973	0.157803	1.88826	0.0589907	0.999924	Kcnj10
104.662	-0.573419	0.303718	-1.888	0.059026	0.999924	Rpl31
1640.53	0.213792	0.113455	1.88439	0.0595128	0.999924	Stat2
514.95	0.310778	0.165126	1.88206	0.0598272	0.999924	Ptger4
27.1784	1.13237	0.602032	1.88092	0.0599829	0.999924	Ccdc189
32.7622	1.01353	0.539751	1.87777	0.060412	0.999924	Mafb
719.802	0.246756	0.131563	1.87557	0.0607148	0.999924	Htra1
1776.6	0.18997	0.101392	1.87362	0.0609829	0.999924	Erc1
525.472	0.287253	0.1535	1.87136	0.0612958	0.999924	Onecut2
380.298	-0.321415	0.171909	-1.86968	0.0615284	0.999924	Rwdd1
25.6177	3.39246	1.81611	1.86798	0.061765	0.999924	Fbxl22
766.15	0.284512	0.15233	1.86773	0.0617997	0.999924	Myh10
75.3983	0.656741	0.35194	1.86606	0.0620331	0.999924	Ttyh2
52.4278	-0.799467	0.429167	-1.86283	0.0624856	0.999924	Dus4l
365.105	-0.365843	0.196424	-1.86252	0.0625296	0.999924	Slirp
29.7229	1.14414	0.614364	1.86231	0.062559	0.999924	Zbtb16
2857.28	0.205376	0.110377	1.86068	0.0627895	0.999924	Cysltr2
341.609	-0.324796	0.174575	-1.8605	0.062815	0.999924	Heatr1
73.7978	0.71681	0.385388	1.85997	0.0628899	0.999924	Pdgfc
54.8353	-0.765071	0.411508	-1.85919	0.0630008	0.999924	Marveld2
2422.8	-0.199416	0.10729	-1.85866	0.0630749	0.999924	Ccdc80
1182.68	-0.209326	0.112662	-1.858	0.063169	0.999924	Rps4x
367.436	0.332104	0.178852	1.85686	0.063331	0.999924	Usf3
393.658	0.306361	0.165208	1.85439	0.0636833	0.999924	Satb1
168.17	-0.494955	0.266971	-1.85396	0.0637443	0.999924	AI987944
106.793	0.546951	0.295163	1.85304	0.063876	0.999924	Gramd2
217.825	-0.438465	0.236754	-1.85198	0.064028	0.999924	Cacng5
18.6881	1.32607	0.716383	1.85107	0.0641602	0.999924	Nsl1
112.001	0.559013	0.302087	1.85051	0.0642406	0.999924	Pcdhga9
4061.02	0.221949	0.120027	1.84916	0.0644353	0.999924	Unc80
28.8066	-1.1149	0.604287	-1.84499	0.0650393	0.999924	Esyt3
27.4797	-1.15393	0.625573	-1.8446	0.0650951	0.999924	Dll3
22.2565	1.33618	0.724477	1.84433	0.0651347	0.999924	Gck
1119.23	0.208625	0.11314	1.84395	0.0651898	0.999924	Csmd1
2521.57	0.200522	0.108757	1.84375	0.0652189	0.999924	Gpr161
105.913	0.642752	0.348695	1.8433	0.0652846	0.999924	Cav1
161.518	0.452105	0.246027	1.83762	0.0661177	0.999924	Palld
221.818	0.401783	0.218666	1.83742	0.0661472	0.999924	Arid5a
459.803	0.296508	0.161541	1.83549	0.0664325	0.999924	Nr3c1
51.0401	-0.813288	0.44388	-1.83223	0.0669178	0.999924	Kcnd2
8710.7	0.169432	0.0925566	1.83058	0.0671639	0.999924	Huwe1
792.684	-0.262967	0.143771	-1.82907	0.0673884	0.999924	Pnmal2
697.888	-0.282734	0.154625	-1.82851	0.0674728	0.999924	Atp5md
185.196	-0.517658	0.28311	-1.82847	0.0674794	0.999924	Cdo1
122.347	0.623806	0.341534	1.82648	0.0677775	0.999924	Card10
46.3549	0.876721	0.481577	1.82052	0.0686796	0.999924	Map10
144.354	0.528226	0.290438	1.81872	0.0689539	0.999924	Vwc2l
9599.47	0.158174	0.0872724	1.81241	0.0699224	0.999924	Vwa5a
6863.67	0.189924	0.104853	1.81133	0.0700892	0.999924	Nefh
427.911	0.339856	0.187755	1.8101	0.0702798	0.999924	Hccs
111.034	-0.565163	0.312241	-1.81002	0.070293	0.999924	Oxtr
3865.29	0.225644	0.124713	1.80931	0.0704029	0.999924	Ncam2
7281.66	0.158003	0.0876571	1.80251	0.0714648	0.999924	Edil3
946.783	-0.227287	0.12615	-1.80172	0.0715891	0.999924	Lclat1
57.1908	0.857436	0.47628	1.80028	0.0718172	0.999924	9130019O22Rik
177.661	-0.42609	0.236695	-1.80017	0.0718345	0.999924	Zkscan2
766.352	-0.246863	0.137176	-1.7996	0.0719234	0.999924	Tbc1d8
24.7956	1.21236	0.673701	1.79955	0.0719324	0.999924	Mbl2
2256.53	-0.174846	0.0972032	-1.79877	0.0720548	0.999924	Cox5a
2115.58	0.196915	0.109646	1.79592	0.0725072	0.999924	Foxn3
49.4795	0.882758	0.492486	1.79245	0.0730604	0.999924	Gm10509
59.0476	-0.85422	0.476994	-1.79084	0.0733193	0.999924	Oser1
2520.19	0.168657	0.094192	1.79057	0.0733624	0.999924	Dop1b
1094.37	-0.221928	0.123992	-1.78985	0.073478	0.999924	Cpne2
413.867	-0.291125	0.162664	-1.78973	0.0734973	0.999924	Fam174b
2196.35	0.171855	0.0961092	1.78813	0.0737554	0.999924	Aatk
1283.59	-0.262213	0.146751	-1.78679	0.0739708	0.999924	Slc25a11
38.6454	1.0261	0.574635	1.78565	0.0741554	0.999924	P2rx6
5487.4	0.148248	0.0830883	1.78422	0.0743877	0.999924	Atp11a
735.213	-0.261359	0.146491	-1.78413	0.0744021	0.999924	Maneal
621.99	0.25759	0.144459	1.78314	0.0745633	0.999924	Sytl2
163.939	-0.441862	0.24793	-1.78221	0.0747155	0.999924	Plekha7
91.1079	0.577869	0.324297	1.78191	0.0747635	0.999924	Podxl
442.504	0.284581	0.159788	1.78099	0.0749136	0.999924	Fat1
28754.7	0.139335	0.0782929	1.77967	0.0751303	0.999924	Kif1b
35302.5	0.161328	0.0906751	1.77919	0.0752093	0.999924	Ank2
53.4867	-0.769816	0.434145	-1.77318	0.0761994	0.999924	Nedd1
200.442	-0.444896	0.251215	-1.77097	0.0765649	0.999924	Prkn
2074.5	-0.197062	0.111281	-1.77085	0.076586	0.999924	Cox7a2
577.788	-0.310335	0.175579	-1.7675	0.0771445	0.999924	Hspa1a
665.545	-0.264248	0.149508	-1.76746	0.0771517	0.999924	Tyro3
7751.91	-0.208227	0.117877	-1.76647	0.0773166	0.999924	mt-Rnr1
1842.12	0.182051	0.103213	1.76384	0.0777586	0.999924	Tenm3
103.124	-0.600634	0.341092	-1.76091	0.078253	0.999924	Cox7a1
405.038	0.300317	0.170603	1.76033	0.0783519	0.999924	Scn1a
20.4367	1.23042	0.699206	1.75973	0.0784528	0.999924	Itprip
174.683	-0.469116	0.266731	-1.75876	0.0786184	0.999924	Nup160
1881.6	0.182593	0.103836	1.75848	0.0786663	0.999924	Paqr8
1569.67	0.247448	0.14112	1.75346	0.0795235	0.999924	Plxna4
137.901	-0.479461	0.273634	-1.7522	0.0797395	0.999924	Nupl2
30.4766	0.953515	0.544629	1.75076	0.0799869	0.999924	Brinp3
282.893	0.357317	0.20412	1.75052	0.0800288	0.999924	Txndc11
43.1791	0.811377	0.463548	1.75036	0.0800558	0.999924	Gm37376
2443.48	0.206981	0.118338	1.74907	0.0802798	0.999924	Nrcam
188.969	-0.399139	0.228455	-1.74712	0.0806157	0.999924	Snip1
39.4795	0.856298	0.490295	1.7465	0.0807248	0.999924	Cdh12
147.607	0.444425	0.254559	1.74586	0.0808344	0.999924	Pcdhb17
902.595	-0.218881	0.125591	-1.74281	0.081367	0.999924	Wipi1
304.583	-0.433577	0.248838	-1.7424	0.0814379	0.999924	Rpl3
18.8805	1.32316	0.760589	1.73965	0.0819209	0.999924	Gm28564
1852.98	-0.192091	0.110451	-1.73915	0.0820078	0.999924	Stum
775.854	-0.248177	0.142789	-1.73806	0.0821996	0.999924	Sdf2
224.253	-0.411052	0.23663	-1.73711	0.0823677	0.999924	Cnpy2
536.23	-0.291367	0.167771	-1.73669	0.0824411	0.999924	Egln1
1300.89	0.208516	0.120154	1.73541	0.0826679	0.999924	Vwa8
64.2748	0.760543	0.43826	1.73537	0.0826752	0.999924	Tpm3-rs7
182.607	-0.41823	0.241597	-1.73111	0.0834329	0.999924	Lhpp
16.3316	1.36684	0.790236	1.72966	0.0836913	0.999924	Mpp4
23.987	1.12199	0.648938	1.72896	0.0838159	0.999924	Gm45053
362.198	0.314172	0.181728	1.72881	0.0838435	0.999924	Syt15
141.375	-0.494043	0.285827	-1.72847	0.0839047	0.999924	Nxph3
42.881	0.801916	0.464024	1.72818	0.083956	0.999924	Irak3
2358.11	0.175912	0.101843	1.72729	0.0841161	0.999924	Ptprg
2460.73	-0.175191	0.101442	-1.727	0.0841669	0.999924	Tmem8b
573.496	0.258768	0.149841	1.72696	0.0841754	0.999924	Ndc1
1046.88	0.202077	0.117141	1.72507	0.0845155	0.999924	Tmem56
1859.59	0.200036	0.115959	1.72505	0.0845183	0.999924	Pura
128.126	-0.466643	0.270533	-1.7249	0.0845451	0.999924	Ankrd39
293.22	-0.341455	0.198197	-1.72281	0.0849231	0.999924	Arl15
16.4387	1.4132	0.820767	1.7218	0.0851053	0.999924	Gm44317
71.9944	-0.70371	0.408807	-1.72137	0.0851829	0.999924	Svbp
304.194	-0.446783	0.259616	-1.72094	0.085262	0.999924	Lpar3
28.4357	0.999345	0.580791	1.72066	0.0853122	0.999924	Ephb4
79.1574	0.669617	0.389483	1.71925	0.0855694	0.999924	Cntn6
24.2213	1.19344	0.694489	1.71844	0.0857164	0.999924	Gimap8
1341.41	-0.209325	0.121827	-1.71822	0.0857567	0.999924	Kcnk2
178.291	0.472091	0.274792	1.71799	0.0857978	0.999924	Btf3l4
3803.8	-0.157604	0.0918342	-1.71618	0.0861285	0.999924	Dclk1
5485.46	-0.146742	0.0855297	-1.71568	0.0862206	0.999924	Nrsn1
73.4501	-0.662249	0.386134	-1.71508	0.0863309	0.999924	AU041133
192.991	-0.39743	0.231803	-1.71452	0.0864334	0.999924	Wdr20
1960.43	0.180162	0.10516	1.71321	0.086673	0.999924	Pcnx
125.212	0.543931	0.317687	1.71216	0.0868673	0.999924	Tecta
23488.8	-0.130136	0.076131	-1.70937	0.0873816	0.999924	Scg2
564.877	0.251542	0.147241	1.70836	0.0875689	0.999924	Tshz3
39.1153	-1.07124	0.627124	-1.70817	0.0876042	0.999924	Gsg1l
1102.57	0.672694	0.394108	1.70688	0.0878446	0.999924	Lypd1
455.729	-0.277312	0.16254	-1.70612	0.0879858	0.999924	Polr1d
24.3391	1.17308	0.688001	1.70505	0.0881847	0.999924	Lrrc46
1104.59	0.208816	0.122525	1.70427	0.0883311	0.999924	Phc3
106.199	-0.540902	0.317493	-1.70367	0.0884436	0.999924	Slc18a1
1617.69	-0.171828	0.100915	-1.7027	0.0886233	0.999924	Ywhaq
171.727	-0.407384	0.239272	-1.7026	0.0886436	0.999924	Ifit1bl1
1113	0.20844	0.122495	1.70162	0.0888263	0.999924	Paqr9
32016.9	0.168228	0.099259	1.69484	0.0901058	0.999924	Map1a
24.7368	1.2325	0.727397	1.6944	0.0901887	0.999924	Ly6c1
105.479	0.56294	0.332338	1.69388	0.090288	0.999924	Ears2
93.6202	0.585965	0.346619	1.69051	0.0909295	0.999924	Sox2
741.515	-0.280013	0.165648	-1.69041	0.0909502	0.999924	Hpca
4183.79	-0.194908	0.11534	-1.68985	0.0910561	0.999924	Atp1a3
189.242	-0.422588	0.250106	-1.68963	0.0910984	0.999924	Tbx3os1
369.492	0.340216	0.201675	1.68695	0.0916128	0.999924	Elf2
85.9908	0.598243	0.354798	1.68615	0.0917666	0.999924	Fsd2
380.761	0.357614	0.212285	1.68459	0.092067	0.999924	Mysm1
7377.26	-0.139814	0.0830003	-1.6845	0.0920845	0.999924	Olfm1
425.686	-0.29645	0.176031	-1.68408	0.0921659	0.999924	Sgsm3
3938.23	0.233411	0.138618	1.68384	0.0922135	0.999924	4932438A13Rik
231.794	0.374414	0.222508	1.6827	0.0924333	0.999924	Kitl
44.165	0.833477	0.495404	1.68242	0.0924874	0.999924	Myocd
611.096	-0.27422	0.163098	-1.68133	0.0926997	0.999924	Gadd45g
467.771	0.3747	0.222914	1.68092	0.0927786	0.999924	Col1a2
195.202	0.438471	0.260902	1.6806	0.0928415	0.999924	Fign
279.097	0.379411	0.225774	1.68049	0.0928623	0.999924	Grip1
2167.14	0.169061	0.10063	1.68003	0.0929508	0.999924	Chd6
185.025	0.426747	0.254339	1.67787	0.0933726	0.999924	Fat3
4293.1	0.178735	0.106573	1.67711	0.0935206	0.999924	Sema5a
304.909	-0.322922	0.192666	-1.67607	0.0937236	0.999924	Fam160a1
2532.26	0.161623	0.0964516	1.67569	0.0937982	0.999924	Usp31
894.146	0.235198	0.140421	1.67495	0.0939448	0.999924	Abca1
221.937	-0.395029	0.235964	-1.67411	0.0941097	0.999924	Tapbpl
110.718	0.485231	0.289989	1.67327	0.0942733	0.999924	Trps1
1322.91	-0.191895	0.114845	-1.6709	0.0947421	0.999924	Stk32a
210.624	0.380006	0.227533	1.67011	0.0948967	0.999924	Mab21l2
17.267	-1.2354	0.74067	-1.66795	0.095326	0.999924	Cdkn2c
158.277	-0.407941	0.244721	-1.66696	0.0955223	0.999924	S100a1
2350.69	-0.15746	0.0944661	-1.66684	0.0955462	0.999924	Hnrnpc
5411.99	0.158737	0.0953493	1.66479	0.0959545	0.999924	Wdfy3
5480.85	0.18743	0.112697	1.66313	0.0962858	0.999924	Jun
70.3911	0.691306	0.415738	1.66284	0.0963445	0.999924	Cacng2
148.623	0.467829	0.281354	1.66278	0.0963571	0.999924	Plekhg5
113.294	0.540928	0.325379	1.66245	0.0964216	0.999924	Kcnq1ot1
255.293	-0.366911	0.220709	-1.66242	0.0964282	0.999924	Tfdp1
2243.1	-0.159586	0.0960094	-1.66219	0.0964737	0.999924	Sema4d
298.743	-0.350748	0.211049	-1.66193	0.0965268	0.999924	Gemin7
9510.77	0.178027	0.107171	1.66115	0.096684	0.999924	Avil
590.881	-0.295975	0.178224	-1.66069	0.0967753	0.999924	Nog
2832.39	-0.206385	0.124294	-1.66046	0.0968225	0.999924	Laptm4a
1131.21	-0.224812	0.135418	-1.66013	0.096888	0.999924	Nsg1
1178.79	0.19385	0.116791	1.6598	0.0969538	0.999924	2610002M06Rik
1239.7	-0.181546	0.10939	-1.65962	0.0969906	0.999924	Dgke
433.759	-0.275702	0.166209	-1.65877	0.0971625	0.999924	Ccdc137
881	-0.203436	0.122683	-1.65822	0.0972732	0.999924	Ero1l
578.552	-0.244713	0.147657	-1.6573	0.0974583	0.999924	Vegfa
317.304	-0.310557	0.187486	-1.65642	0.0976362	0.999924	Daglb
307.035	-0.314304	0.189756	-1.65635	0.0976503	0.999924	Lmf2
749.275	0.238891	0.144293	1.6556	0.0978038	0.999924	Ep300
531.668	-0.258335	0.156047	-1.6555	0.0978226	0.999924	Pitpnm3
65.9127	0.627645	0.37914	1.65544	0.0978347	0.999924	Chdh
854.9	0.211948	0.128136	1.65408	0.0981104	0.999924	Git1
49.5785	-0.739663	0.447242	-1.65383	0.0981614	0.999924	Hilpda
416.641	0.314409	0.190146	1.65352	0.0982261	0.999924	Lgi4
2072.81	0.172689	0.104527	1.65209	0.0985153	0.999924	Ano6
40.5291	0.791125	0.479145	1.65112	0.0987144	0.999924	Ildr2
89.372	0.575403	0.34881	1.64962	0.0990208	0.999924	Fzd4
512.737	-0.276755	0.16777	-1.64961	0.0990227	0.999924	Mettl16
239.936	-0.336539	0.204027	-1.64948	0.0990491	0.999924	Ccdc66
49.4787	-0.713637	0.432757	-1.64905	0.0991378	0.999924	Pcdha1
235.972	0.382555	0.232383	1.64622	0.0997178	0.999924	Slc1a5
139.633	0.448456	0.272451	1.646	0.0997629	0.999924	Gdpgp1
65.7349	0.639617	0.388767	1.64525	0.0999192	0.999924	Dennd3
733.748	-0.228615	0.139045	-1.64417	0.10014	0.999924	Coa3
866.688	0.220416	0.134076	1.64397	0.100183	0.999924	Arhgap32
44.369	-0.783915	0.477041	-1.64329	0.100323	0.999924	Eci3
466.657	-0.294055	0.179132	-1.64156	0.100681	0.999924	Mrpl15
2855.34	0.200578	0.12226	1.64058	0.100884	0.999924	Abca8a
137.149	-0.440372	0.268585	-1.6396	0.101088	0.999924	Rps6ka6
640.276	-0.255721	0.155973	-1.63952	0.101105	0.999924	Slc45a3
129.81	-0.442924	0.270333	-1.63844	0.101331	0.999924	Slc35d1
1300.52	-0.184073	0.112414	-1.63745	0.101536	0.999924	Atp5mpl
684.836	0.272603	0.166666	1.63562	0.101918	0.999924	Opcml
1020.28	0.194003	0.118678	1.6347	0.102112	0.999924	Peak1
39.5073	0.852714	0.522179	1.63299	0.102471	0.999924	Kdm4d
3289.1	-0.15051	0.0922722	-1.63115	0.102859	0.999924	Cox6b1
6865.88	0.146738	0.0899625	1.6311	0.102869	0.999924	Herc2
120181	0.133096	0.0816008	1.63106	0.102877	0.999924	Map1b
391.378	0.331403	0.203226	1.63072	0.10295	0.999924	Tstd2
7758.63	-0.178805	0.109664	-1.63048	0.102999	0.999924	Ass1
51.6144	0.68868	0.422459	1.63017	0.103065	0.999924	Lrrc1
507.157	-0.322399	0.197794	-1.62998	0.103107	0.999924	Btaf1
17.0358	-1.28508	0.788656	-1.62946	0.103216	0.999924	Wnt16
34.2266	-0.993084	0.609552	-1.6292	0.10327	0.999924	Mob3c
47.8101	0.728937	0.447466	1.62903	0.103306	0.999924	Fgf9
226.13	-0.407521	0.250206	-1.62874	0.103367	0.999924	Gpr75
483.393	0.260086	0.159857	1.62699	0.10374	0.999924	Sap130
365.722	0.300516	0.184738	1.62672	0.103797	0.999924	Serinc2
322.106	0.291254	0.179072	1.62646	0.103851	0.999924	Coil
3332.85	0.145776	0.0897135	1.62491	0.104182	0.999924	Fry
1789.46	0.164694	0.101372	1.62464	0.10424	0.999924	Chd8
1640.12	-0.164347	0.101222	-1.62363	0.104456	0.999924	Stard7
133.027	-0.440104	0.271118	-1.62329	0.104527	0.999924	Mterf4
92.53	-0.561711	0.346252	-1.62226	0.104747	0.999924	Bak1
571.629	0.238469	0.147165	1.62041	0.105143	0.999924	Pdpr
123.608	0.504981	0.311948	1.6188	0.105491	0.999924	Fhdc1
40.5743	-0.817554	0.505416	-1.61759	0.105752	0.999924	Rdm1
70.8553	-0.581079	0.359339	-1.61708	0.105862	0.999924	AI506816
47.5436	-0.697649	0.431429	-1.61706	0.105864	0.999924	2310058D17Rik
876.875	-0.197916	0.122422	-1.61667	0.105949	0.999924	Abat
62.2757	-0.622115	0.385776	-1.61263	0.106825	0.999924	Lims2
215.739	-0.349573	0.216774	-1.61262	0.106828	0.999924	Snx29
102.412	-0.501914	0.311498	-1.61129	0.107117	0.999924	Kcnj9
1769.64	-0.17244	0.107109	-1.60996	0.107408	0.999924	Mob4
224.007	0.343992	0.213771	1.60916	0.107582	0.999924	Plekhm1
2047.62	-0.244038	0.151726	-1.60841	0.107745	0.999924	St18
643.396	0.246704	0.15343	1.60793	0.107851	0.999924	Ncoa3
403.734	-0.343018	0.213342	-1.60783	0.107872	0.999924	Il4ra
105.359	-0.600197	0.373497	-1.60696	0.108062	0.999924	Gria1
1085.73	0.197979	0.123299	1.60568	0.108345	0.999924	Epha5
683.787	-0.259902	0.161872	-1.60561	0.10836	0.999924	Adamtsl3
78.8552	0.573458	0.357252	1.60519	0.108452	0.999924	B3gat2
251.607	0.340046	0.211849	1.60513	0.108465	0.999924	Sipa1l1
49.197	2.20186	1.37315	1.60351	0.108823	0.999924	Slc6a2
528.912	-0.282034	0.175979	-1.60266	0.10901	0.999924	Mrps23
382.329	-0.26643	0.166379	-1.60134	0.109301	0.999924	Tmem255b
824.482	0.220692	0.137836	1.60112	0.109351	0.999924	Rgs6
5827.17	-0.126473	0.0790201	-1.60052	0.109483	0.999924	Slc25a3
651.056	0.251047	0.156892	1.60012	0.109571	0.999924	Celsr1
26.3107	-0.94636	0.591899	-1.59885	0.109853	0.999924	Gm21781
1746.94	0.201765	0.126224	1.59846	0.10994	0.999924	Tmem245
231.642	-0.362637	0.226874	-1.59841	0.109952	0.999924	Mrpl55
67.2314	-0.691455	0.432621	-1.59829	0.109978	0.999924	Mustn1
1165.68	0.212085	0.132756	1.59756	0.110141	0.999924	Nufip2
2401.56	0.152799	0.0956552	1.59739	0.110179	0.999924	Hcfc1
194.509	0.383542	0.240329	1.59591	0.11051	0.999924	Ccn3
418.204	-0.270876	0.169776	-1.59548	0.110604	0.999924	Exd2
352.807	-0.299147	0.187548	-1.59504	0.110702	0.999924	Bloc1s6
61.453	-0.768225	0.481853	-1.59431	0.110866	0.999924	Prmt8
74.3826	-0.593339	0.372173	-1.59425	0.110879	0.999924	Tmem218
28189.8	0.128972	0.0809205	1.59381	0.110978	0.999924	Sptbn1
2771.96	0.141819	0.0889833	1.59378	0.110986	0.999924	Gsn
96.8994	0.611544	0.383946	1.59278	0.111208	0.999924	Cdk6
20.5941	1.10213	0.692149	1.59233	0.111311	0.999924	Gm17753
5171.85	0.154495	0.0970426	1.59203	0.111377	0.999924	Thy1
3273.32	0.174995	0.109981	1.59115	0.111577	0.999924	Spock3
1002.6	-0.21188	0.133231	-1.59031	0.111765	0.999924	Ctsz
2533.17	-0.15662	0.0984987	-1.59007	0.111818	0.999924	Cplx2
673.253	0.215845	0.135794	1.58951	0.111945	0.999924	Cacna2d3
532.579	-0.242626	0.152737	-1.58852	0.112169	0.999924	Kcns3
94.0781	-0.511266	0.321888	-1.58833	0.112211	0.999924	Fam124a
555.197	-0.24949	0.1571	-1.58809	0.112265	0.999924	Chst11
323.741	-0.299863	0.188883	-1.58756	0.112385	0.999924	Polk
7723.02	-0.144438	0.0909872	-1.58746	0.112409	0.999924	Parva
191.604	0.408864	0.257714	1.5865	0.112625	0.999924	Zfp36l1
468.566	0.242276	0.152724	1.58637	0.112656	0.999924	Cnnm1
352.718	-0.304932	0.19226	-1.58604	0.11273	0.999924	Trpc6
526.911	0.273781	0.17263	1.58594	0.112753	0.999924	Nrep
1070.36	-0.184808	0.116601	-1.58496	0.112976	0.999924	Gabrg2
91.3679	0.521512	0.329686	1.58185	0.113685	0.999924	Vsig10l
57.7042	0.871214	0.550791	1.58175	0.113706	0.999924	Vwf
64.0422	0.650397	0.41145	1.58074	0.113936	0.999924	Specc1
774.201	0.218479	0.138227	1.58058	0.113973	0.999924	Mmd2
1508.61	-0.16977	0.107457	-1.57989	0.114132	0.999924	Tspyl2
167.643	0.384645	0.243495	1.57969	0.114179	0.999924	Cdan1
1008.75	0.229544	0.145372	1.57901	0.114334	0.999924	Slc7a2
411.936	0.277341	0.175644	1.579	0.114337	0.999924	Fubp3
259.555	-0.317786	0.201464	-1.57738	0.114708	0.999924	Nell1
248.704	0.334874	0.212372	1.57683	0.114835	0.999924	Fam53b
3135.47	0.146174	0.0927634	1.57577	0.115078	0.999924	Ctnna1
2191.03	0.156492	0.0993434	1.57527	0.115195	0.999924	Zfp106
27.236	0.988096	0.627451	1.57478	0.115308	0.999924	Calcrl
269.316	-0.300524	0.191398	-1.57015	0.11638	0.999924	Rab5if
3346.48	0.148684	0.0947005	1.57004	0.116405	0.999924	Robo2
823.425	-0.214502	0.136664	-1.56955	0.11652	0.999924	Trpc4
155.468	-0.441965	0.281733	-1.56874	0.116709	0.999924	Fuz
16404.9	0.140421	0.0895928	1.56732	0.11704	0.999924	Apoe
2478.96	0.167682	0.107099	1.56568	0.117424	0.999924	Faxc
2505.42	0.164303	0.104954	1.56547	0.117473	0.999924	Sptbn2
1358.36	0.193842	0.123862	1.56499	0.117586	0.999924	Secisbp2l
94.9892	-0.555841	0.355407	-1.56395	0.117828	0.999924	Tchp
162.199	-0.438657	0.280826	-1.56203	0.118282	0.999924	Rbm4b
207.154	-0.352878	0.226191	-1.56008	0.11874	0.999924	Pold3
84.0145	-0.51932	0.332987	-1.55958	0.118858	0.999924	Mansc1
468.264	0.300396	0.192719	1.55873	0.119061	0.999924	Mast4
703.949	-0.216833	0.139187	-1.55785	0.119268	0.999924	Trim32
98.3819	0.725632	0.465814	1.55777	0.119287	0.999924	Irak4
191.206	-0.387199	0.248564	-1.55775	0.119294	0.999924	Filip1
129.033	-0.471516	0.302774	-1.55732	0.119394	0.999924	Dgat1
708.688	0.23168	0.148846	1.55651	0.119587	0.999924	Pdzd2
357.585	0.296967	0.190836	1.55614	0.119676	0.999924	Gucy1a2
104.169	-0.520506	0.334562	-1.55579	0.119759	0.999924	Pdgfrb
46.6487	0.702852	0.452495	1.55328	0.120356	0.999924	Gm48623
1255.36	0.19002	0.122338	1.55324	0.120365	0.999924	Mgll
1565.48	0.178943	0.115227	1.55296	0.120433	0.999924	Rnf130
785.003	-0.206005	0.132848	-1.55068	0.120977	0.999924	Zc3h13
363.956	-0.315398	0.203448	-1.55026	0.12108	0.999924	Smarcad1
67.6523	-0.607346	0.391811	-1.5501	0.121118	0.999924	2510002D24Rik
3470.44	-0.15452	0.0997259	-1.54944	0.121275	0.999924	Stip1
1706.49	0.163278	0.105381	1.54941	0.121283	0.999924	Depdc5
62.9507	0.716007	0.462202	1.54912	0.121353	0.999924	Pappa
802.88	0.210491	0.136001	1.54771	0.121692	0.999924	Slc7a7
229.809	0.345539	0.223319	1.54729	0.121794	0.999924	Lsm4
2192.9	0.169538	0.109577	1.5472	0.121814	0.999924	Myh14
29.7141	0.85481	0.552545	1.54704	0.121854	0.999924	H60b
29.5077	-0.894399	0.578258	-1.54671	0.121933	0.999924	Gm28875
28.9532	1.01959	0.65965	1.54565	0.122189	0.999924	Smad3
3837.61	0.216163	0.139968	1.54438	0.122497	0.999924	Ahnak
242.713	-0.347398	0.22502	-1.54386	0.122623	0.999924	Cd109
1317.83	-0.170382	0.110374	-1.54368	0.122665	0.999924	Arhgdig
22.695	1.17222	0.759791	1.54282	0.122874	0.999924	Tek
875.695	-0.241062	0.156312	-1.54219	0.123028	0.999924	Sec13
16.5817	-1.22171	0.792243	-1.54209	0.123053	0.999924	Mms22l
531.478	0.230286	0.14946	1.54079	0.123369	0.999924	Tubgcp2
1056.27	0.195823	0.127211	1.53935	0.123719	0.999924	Dcun1d4
104.942	0.525306	0.341442	1.53849	0.123928	0.999924	Rell1
268.424	-0.318671	0.207242	-1.53768	0.124128	0.999924	Tmem128
254.015	0.374402	0.243489	1.53765	0.124133	0.999924	Nfkbiz
241.094	-0.39562	0.257552	-1.53608	0.124519	0.999924	Dus1l
170.948	0.383895	0.249958	1.53584	0.124579	0.999924	Nol9
476.337	-0.261433	0.17039	-1.53433	0.12495	0.999924	Tmem54
88.6081	0.586299	0.382561	1.53257	0.125383	0.999924	Lhfpl1
563.907	-0.246003	0.160527	-1.53247	0.125406	0.999924	Sema4b
967.618	-0.182443	0.119066	-1.53229	0.125451	0.999924	Cox5b
177.091	0.403419	0.263658	1.53008	0.125997	0.999924	Phlda1
87.3472	-0.502939	0.328847	-1.5294	0.126165	0.999924	Spidr
33.156	0.867878	0.567526	1.52923	0.126207	0.999924	Areg
38.5008	-0.977786	0.639783	-1.52831	0.126436	0.999924	Rab11fip1
141.826	-0.402561	0.263522	-1.52762	0.126607	0.999924	Rcor2
57.0614	0.65085	0.426314	1.52669	0.126838	0.999924	Kif21b
1137.66	-0.176821	0.115912	-1.52547	0.127142	0.999924	Baalc
100.101	0.498081	0.327186	1.52232	0.12793	0.999924	Prrg1
211.498	-0.34568	0.227091	-1.52221	0.127957	0.999924	Mak16
76.2907	0.61935	0.406903	1.52211	0.127983	0.999924	Zfp568
646.209	0.217972	0.143212	1.52202	0.128004	0.999924	Atg2a
196.352	-0.439181	0.288844	-1.52048	0.128391	0.999924	Gem
267.728	-0.381477	0.250986	-1.51991	0.128533	0.999924	Rbfa
17.372	1.2598	0.829004	1.51965	0.128599	0.999924	H2-Q7
142.262	0.44169	0.290664	1.51959	0.128614	0.999924	Ncan
5740.67	0.127217	0.0837226	1.51951	0.128635	0.999924	Mprip
213.423	-0.337153	0.221959	-1.51899	0.128765	0.999924	Parp8
708.515	0.224648	0.14795	1.51841	0.128912	0.999924	Slc45a4
90.0957	-0.503644	0.331695	-1.5184	0.128915	0.999924	Arntl
496.119	0.257286	0.169642	1.51665	0.129356	0.999924	Crybg3
600.349	0.264637	0.174566	1.51597	0.129526	0.999924	Slc16a7
1534.47	0.239106	0.157741	1.51582	0.129565	0.999924	Atrx
101.172	0.484214	0.319537	1.51536	0.129681	0.999924	Hyls1
72.2729	-0.558768	0.368745	-1.51532	0.12969	0.999924	Msantd1
173.16	-0.477969	0.315475	-1.51508	0.129753	0.999924	Mgst3
770.839	-0.240382	0.15869	-1.51479	0.129826	0.999924	Pnmal1
347.801	0.262766	0.173622	1.51344	0.130168	0.999924	Tmem260
589.604	-0.221414	0.146353	-1.51288	0.13031	0.999924	Isca1
43.2116	-0.694454	0.459412	-1.51161	0.130632	0.999924	Gm31816
2143.53	0.170076	0.112537	1.51129	0.130714	0.999924	Impad1
390.959	-0.288507	0.190987	-1.51061	0.130888	0.999924	Arl4d
725.3	-0.221434	0.146629	-1.51017	0.131001	0.999924	Pdxk
188.4	-0.355189	0.235765	-1.50654	0.131929	0.999924	Plpp5
1239.09	-0.181451	0.120469	-1.50621	0.132014	0.999924	Sprn
703.113	-0.197837	0.131384	-1.50579	0.132121	0.999924	Mgrn1
1041.55	0.183402	0.121836	1.50532	0.132242	0.999924	Hectd3
2278.48	-0.144655	0.0961908	-1.50383	0.132624	0.999924	Psmd14
46.0152	0.689455	0.458616	1.50334	0.132751	0.999924	Olfr920
96.3683	-0.477389	0.317841	-1.50197	0.133104	0.999924	Ccdc148
163.482	0.414988	0.276462	1.50107	0.133338	0.999924	Pold2
376.918	0.254931	0.169871	1.50073	0.133426	0.999924	Lhfpl2
288.957	0.31696	0.211387	1.49943	0.133762	0.999924	Myo6
1091.67	0.209834	0.140005	1.49876	0.133936	0.999924	Cpsf6
1842.85	0.172016	0.114809	1.49829	0.134058	0.999924	Oip5os1
87.2495	0.508598	0.339494	1.4981	0.134106	0.999924	Birc3
5772.61	-0.148433	0.0991156	-1.49757	0.134244	0.999924	Cckar
22.4565	0.984	0.657142	1.49739	0.134291	0.999924	Tmem88b
118.602	-0.448173	0.299413	-1.49684	0.134436	0.999924	Pigv
24.7136	0.945672	0.632214	1.49581	0.134703	0.999924	Parpbp
30.142	-0.943247	0.631125	-1.49455	0.135032	0.999924	A830005F24Rik
1611.07	0.223183	0.149558	1.49228	0.135625	0.999924	Zfp36
68.5604	0.654706	0.438889	1.49173	0.135769	0.999924	Grm8
91.6845	-0.473242	0.317251	-1.4917	0.135778	0.999924	Armc7
748.443	-0.256456	0.171943	-1.49152	0.135825	0.999924	Hexa
3965.92	-0.132116	0.0886172	-1.49086	0.135999	0.999924	45543
187.524	0.404847	0.271566	1.49079	0.136018	0.999924	Fbxl21
612.918	-0.22327	0.149831	-1.49015	0.136185	0.999924	1110008P14Rik
7985	-0.175017	0.117479	-1.48977	0.136285	0.999924	Hsp90aa1
398.748	-0.247118	0.165931	-1.48928	0.136414	0.999924	AW209491
3447.33	0.126302	0.0848559	1.48843	0.136637	0.999924	Clasp1
268.512	0.329043	0.22107	1.48841	0.136642	0.999924	Prex2
17.037	-1.07454	0.721994	-1.4883	0.136672	0.999924	Gm49012
637.154	0.237852	0.15983	1.48816	0.136708	0.999924	Lrguk
39.2197	-0.7106	0.477856	-1.48706	0.136999	0.999924	Myh3
2021.9	0.181139	0.121832	1.48679	0.13707	0.999924	Gpm6b
1858.45	0.151801	0.102149	1.48608	0.137258	0.999924	Cacnb4
221.406	-0.342522	0.230656	-1.48499	0.137546	0.999924	Cox20
464.811	-0.248607	0.16745	-1.48467	0.137632	0.999924	Cadps2
668.197	-0.23896	0.160965	-1.48455	0.137663	0.999924	Stk32c
335.48	-0.267339	0.18032	-1.48259	0.138184	0.999924	Nhsl1
81.6009	-0.541778	0.365454	-1.48248	0.138213	0.999924	Vcan
81.5334	0.576672	0.389153	1.48186	0.138377	0.999924	Bcl3
875.473	0.220159	0.148654	1.48102	0.138602	0.999924	Pgap1
1161.43	-0.164471	0.111066	-1.48084	0.138649	0.999924	Nampt
476.37	0.273789	0.18491	1.48066	0.138698	0.999924	Olfml2a
506.696	0.226871	0.153238	1.48052	0.138736	0.999924	Dhx33
348.371	-0.282865	0.191102	-1.48018	0.138826	0.999924	Rassf3
69.1794	-0.616589	0.416598	-1.48006	0.138857	0.999924	Kcnn2
142.435	0.391264	0.264439	1.4796	0.138979	0.999924	Fut10
1262.64	0.188049	0.127151	1.47895	0.139154	0.999924	Zmiz1
73.5961	0.535011	0.361965	1.47807	0.139388	0.999924	Gm14410
398.342	-0.270941	0.18335	-1.47773	0.139481	0.999924	Tox2
461.538	-0.243369	0.164734	-1.47734	0.139584	0.999924	Ppp1r18
2915.11	-0.139244	0.0943	-1.47661	0.13978	0.999924	Hint1
29.1083	0.827915	0.560835	1.47622	0.139885	0.999924	Syt10
367.302	-0.272213	0.184563	-1.4749	0.140239	0.999924	Ptpre
1924.77	0.167219	0.113392	1.4747	0.140292	0.999924	Fbxo31
81.8537	-0.489362	0.331962	-1.47415	0.14044	0.999924	Dnah1
826.127	0.259079	0.175915	1.47275	0.140818	0.999924	Pxdn
272.188	-0.374407	0.254229	-1.47271	0.140828	0.999924	Galnt18
281.47	0.304829	0.207255	1.47079	0.141347	0.999924	Vsnl1
584.605	-0.27759	0.188777	-1.47046	0.141437	0.999924	Psd
110.786	-0.430275	0.292695	-1.47004	0.14155	0.999924	4933404O12Rik
1085.03	-0.18145	0.123508	-1.46914	0.141794	0.999924	Msrb2
30.2284	-0.818368	0.557038	-1.46914	0.141794	0.999924	4930522L14Rik
5446.11	0.159488	0.108593	1.46867	0.141922	0.999924	Tln2
840.118	0.209241	0.142475	1.46862	0.141937	0.999924	Inf2
699.362	-0.194155	0.132338	-1.46712	0.142344	0.999924	Kcnh6
2133.55	-0.148136	0.101085	-1.46547	0.142793	0.999924	Mat2a
1310.69	0.212327	0.145081	1.4635	0.14333	0.999924	Csrnp3
36.0902	0.83942	0.57357	1.4635	0.14333	0.999924	Tmem216
296.5	0.296722	0.202777	1.46329	0.143387	0.999924	Yod1
788.072	-0.206859	0.14145	-1.46242	0.143627	0.999924	Tspan15
3067.73	0.14924	0.102081	1.46198	0.143747	0.999924	Armh4
120.524	0.436431	0.298686	1.46117	0.143969	0.999924	Acacb
3315.95	0.156082	0.10694	1.45953	0.144418	0.999924	Adam23
71.9636	0.550362	0.377133	1.45933	0.144474	0.999924	Slc27a6
4809.77	-0.123971	0.0849902	-1.45865	0.14466	0.999924	Camk2a
16309.9	0.123902	0.0849708	1.45818	0.144792	0.999924	Ttll7
5083.16	0.154342	0.105853	1.45809	0.144816	0.999924	Macf1
290.587	0.321408	0.220439	1.45804	0.144829	0.999924	Gm38393
27.0872	0.863725	0.592752	1.45714	0.145077	0.999924	Flnc
86.9721	0.475668	0.326563	1.45659	0.145229	0.999924	Arhgef26
600.586	-0.216943	0.149046	-1.45555	0.145518	0.999924	Ndufa1
17.2844	1.14372	0.787223	1.45286	0.146264	0.999924	Fbxo40
595.715	-0.206079	0.141883	-1.45246	0.146373	0.999924	Hebp2
187.054	-0.353143	0.243335	-1.45126	0.146707	0.999924	Cfap300
50.4719	0.633972	0.436864	1.45119	0.146728	0.999924	Mgmt
26.5349	-0.868185	0.598855	-1.44974	0.147131	0.999924	Traip
1240.42	-0.164252	0.113307	-1.44962	0.147165	0.999924	Sec63
2761	0.168297	0.116103	1.44955	0.147185	0.999924	Synpr
198.85	-0.375253	0.25898	-1.44896	0.147348	0.999924	Simc1
22.2492	0.955748	0.659702	1.44876	0.147405	0.999924	Gm38560
154.869	-0.381931	0.263663	-1.44856	0.147462	0.999924	Pnp
291.226	-0.283007	0.195375	-1.44853	0.147468	0.999924	Pla2g15
106.928	-0.429051	0.296421	-1.44744	0.147774	0.999924	Mrpl33
380.165	-0.308312	0.213051	-1.44713	0.147861	0.999924	Rps7
672.943	-0.209837	0.145024	-1.44692	0.14792	0.999924	Clcn7
12265.2	-0.127902	0.0884187	-1.44655	0.148024	0.999924	F2r
549.737	0.247424	0.171076	1.44628	0.1481	0.999924	Nid1
380.427	0.245459	0.169739	1.4461	0.14815	0.999924	Trp53inp1
2333.84	0.147559	0.102066	1.44572	0.148256	0.999924	Cacna1c
2603.51	0.137304	0.0950145	1.44509	0.148433	0.999924	Rab3gap2
545.534	0.27438	0.18994	1.44457	0.14858	0.999924	Hspg2
437.135	0.231096	0.160012	1.44424	0.148672	0.999924	Mrpl58
529.63	0.236272	0.163606	1.44416	0.148695	0.999924	Nrip1
1992.75	0.142479	0.0986989	1.44357	0.148859	0.999924	Mef2a
263.938	0.310081	0.214819	1.44345	0.148894	0.999924	Adgrg2
56.0438	-0.681919	0.472615	-1.44287	0.149058	0.999924	Rfc4
1642.77	0.14575	0.101022	1.44276	0.149088	0.999924	Numa1
62.1944	0.593478	0.41138	1.44265	0.149118	0.999924	Lin9
499.224	-0.225157	0.15612	-1.44221	0.149244	0.999924	Slc35f5
200.171	-0.333902	0.231685	-1.44119	0.14953	0.999924	Snu13
144.996	0.377695	0.262233	1.4403	0.149783	0.999924	Naip1
44.1431	-0.648982	0.450883	-1.43936	0.150049	0.999924	Gm45133
2480.63	-0.132866	0.0923369	-1.43893	0.150172	0.999924	Qdpr
591.843	0.30528	0.21216	1.43891	0.150175	0.999924	Slit1
377.691	0.250565	0.174146	1.43882	0.150201	0.999924	Tns2
876.278	-0.20287	0.141082	-1.43796	0.150445	0.999924	Fbxo25
1520.31	0.174957	0.121691	1.43772	0.150514	0.999924	Psme4
7220.74	-0.121723	0.0846642	-1.43772	0.150514	0.999924	Lrp11
2175.17	0.135161	0.0940138	1.43767	0.150528	0.999924	Kcnip4
21.7085	-1.00452	0.698871	-1.43735	0.150618	0.999924	2500002B13Rik
411.348	-0.261186	0.181835	-1.43639	0.150891	0.999924	Nup62
311.878	0.320639	0.223273	1.43609	0.150977	0.999924	Stxbp5l
54.6667	-0.694779	0.483899	-1.43579	0.151061	0.999924	Dpm1
1373.18	0.184806	0.128724	1.43568	0.151093	0.999924	Matn2
344.547	-0.276921	0.192889	-1.43565	0.151103	0.999924	Pgpep1
44.1046	0.704813	0.491044	1.43534	0.151192	0.999924	Ccdc173
81.973	-0.521196	0.363173	-1.43512	0.151254	0.999924	Zbtb26
76.7532	-0.501353	0.349357	-1.43507	0.151266	0.999924	Helq
234.621	0.292519	0.203855	1.43494	0.151305	0.999924	Serac1
197.959	0.326912	0.227933	1.43425	0.151502	0.999924	Tada2a
119.167	0.47944	0.334419	1.43365	0.151671	0.999924	Trmt44
165.554	-0.352877	0.246196	-1.43332	0.151766	0.999924	Adprhl1
201.202	-0.332428	0.23201	-1.43282	0.151909	0.999924	Adcy7
19.1965	-0.963428	0.672514	-1.43258	0.151979	0.999924	Fhod1
8651.01	-0.160581	0.11211	-1.43235	0.152043	0.999924	Hsp90b1
254.818	0.310385	0.216837	1.43143	0.152308	0.999924	Gbp7
44.2861	0.715862	0.50012	1.43138	0.152321	0.999924	Vstm4
53.6991	0.658325	0.459954	1.43128	0.152349	0.999924	K230015D01Rik
19.3495	-1.0238	0.715459	-1.43097	0.152438	0.999924	Mfng
202.22	-0.326889	0.228521	-1.43045	0.152587	0.999924	Cnih2
1584.76	0.153337	0.107202	1.43036	0.152614	0.999924	Ylpm1
23.0646	0.982557	0.687289	1.42961	0.152828	0.999924	A930037H05Rik
1194.45	0.170434	0.119308	1.42852	0.153143	0.999924	Scn1b
549.734	0.233379	0.163395	1.42831	0.153202	0.999924	Urod
125.526	-0.401085	0.280821	-1.42826	0.153217	0.999924	Dhfr
2304.14	-0.170455	0.119376	-1.42788	0.153325	0.999924	Cox7b
101.515	0.573138	0.401582	1.4272	0.153521	0.999924	Setdb2
311.834	0.281606	0.19732	1.42715	0.153536	0.999924	Casp3
185.852	-0.330361	0.231639	-1.42619	0.153814	0.999924	Prrt1
48.4916	-0.657117	0.461301	-1.42449	0.154306	0.999924	Lmo2
5488.52	0.177202	0.124431	1.42409	0.15442	0.999924	Pclo
561.479	0.207061	0.145407	1.42401	0.154444	0.999924	Dnajb12
29.9457	0.785018	0.551447	1.42356	0.154574	0.999924	Gm10644
1577.01	0.161904	0.113735	1.42352	0.154586	0.999924	Elovl7
3975.62	-0.151057	0.106119	-1.42347	0.154599	0.999924	Steap3
393.259	-0.250297	0.175906	-1.4229	0.154765	0.999924	Olfml2b
756.907	0.191479	0.134627	1.4223	0.154939	0.999924	Garem1
47.576	0.62364	0.438665	1.42168	0.15512	0.999924	Psmg4
22.8066	1.25282	0.881439	1.42133	0.15522	0.999924	Galnt6
639.083	0.21664	0.152552	1.42011	0.155575	0.999924	Dgkb
425.705	0.255428	0.179917	1.4197	0.155695	0.999924	Slc35f1
439.767	0.270529	0.190571	1.41957	0.155733	0.999924	Itgav
80.2544	-0.547616	0.385872	-1.41916	0.155851	0.999924	Btc
5231.4	-0.140069	0.0987073	-1.41903	0.155889	0.999924	P2rx2
1033.32	-0.222349	0.156734	-1.41864	0.156004	0.999924	Galnt9
32.326	-0.805633	0.56795	-1.41849	0.156047	0.999924	9230112J17Rik
231.406	-0.3055	0.21544	-1.41803	0.156182	0.999924	Chrm1
379.309	-0.25117	0.177177	-1.41762	0.156301	0.999924	Pdcd6
35.054	-0.800798	0.564904	-1.41758	0.156313	0.999924	Chil1
29.5512	0.793998	0.560301	1.41709	0.156456	0.999924	Sfrp4
31.7201	-0.832435	0.587529	-1.41684	0.15653	0.999924	Ano7
226.911	0.315074	0.222707	1.41475	0.157142	0.999924	Cebpd
111.978	0.44228	0.312777	1.41404	0.157349	0.999924	Ccnd1
482.786	-0.245396	0.173593	-1.41363	0.157471	0.999924	Rpl17
504.697	0.209576	0.148256	1.41361	0.157477	0.999924	Utp20
1049.11	-0.16383	0.116	-1.41233	0.157852	0.999924	Ptprr
6848.99	0.134854	0.0954907	1.41222	0.157884	0.999924	Mycbp2
313.038	-0.264017	0.18697	-1.41208	0.157926	0.999924	Lhfpl5
60.1855	-0.565951	0.40102	-1.41128	0.158162	0.999924	Gm28187
292.31	-0.266894	0.189146	-1.41105	0.15823	0.999924	Tspyl3
910.121	-0.199054	0.14111	-1.41063	0.158353	0.999924	Arhgap26.1
335.161	0.252803	0.179346	1.40959	0.158662	0.999924	Ap4s1
1077.82	-0.184811	0.131129	-1.40938	0.158723	0.999924	Cdk17
329.37	0.376401	0.267084	1.4093	0.158747	0.999924	Cp
21.7014	0.921974	0.654317	1.40906	0.158817	0.999924	Spag5
926.099	-0.183973	0.130567	-1.40903	0.158826	0.999924	Ttll1
1341.87	0.161323	0.114524	1.40864	0.158942	0.999924	Itch
235.811	0.326285	0.231811	1.40755	0.159265	0.999924	Faah
198.1	0.310587	0.220801	1.40663	0.159536	0.999924	Zcchc24
48.0979	0.61672	0.438513	1.40639	0.159608	0.999924	Prr15
13197.2	-0.136934	0.0973915	-1.40602	0.159718	0.999924	Htr3a
1748.44	0.176617	0.125653	1.40559	0.159847	0.999924	Lyst
640.028	-0.226486	0.161338	-1.4038	0.160379	0.999924	Pik3r2
783.728	-0.224156	0.159686	-1.40373	0.160399	0.999924	Carhsp1
897.675	-0.211889	0.151006	-1.40318	0.160563	0.999924	Mgat4b
48.0475	0.612653	0.436827	1.40251	0.160763	0.999924	Nudt6
99.2983	-0.449464	0.320517	-1.40231	0.160823	0.999924	Mtrf1l
159.841	-0.386016	0.275368	-1.40182	0.16097	0.999924	Ppif
93.7492	-0.461331	0.329134	-1.40165	0.161019	0.999924	Creld2
1255.24	-0.169946	0.121264	-1.40146	0.161077	0.999924	Usp11
217.668	0.307345	0.219319	1.40136	0.161106	0.999924	Polr3gl
59.128	0.670636	0.478635	1.40114	0.161172	0.999924	Frem2
52.3292	-0.641434	0.457809	-1.4011	0.161185	0.999924	Kcnab3
47.5428	-0.646298	0.461401	-1.40073	0.161295	0.999924	Gm6970
573.618	-0.206166	0.147186	-1.40071	0.1613	0.999924	Bex1
548.637	0.215482	0.153854	1.40056	0.161344	0.999924	Anks1
210.333	-0.364625	0.26035	-1.40052	0.161358	0.999924	Cidea
297.311	-0.283579	0.202484	-1.4005	0.161364	0.999924	Nit1
372.488	0.242172	0.172945	1.40028	0.161428	0.999924	Fbxo7
311.793	0.303122	0.21649	1.40016	0.161464	0.999924	Lingo1
175.416	0.359518	0.256961	1.39911	0.161779	0.999924	D930028M14Rik
1601.4	0.158233	0.113111	1.39892	0.161837	0.999924	Map4k4
481.939	0.228492	0.163399	1.39837	0.162003	0.999924	Gm10419
1066.84	-0.187916	0.134413	-1.39805	0.162097	0.999924	Cers2
3668.68	0.119517	0.085496	1.39792	0.162136	0.999924	Fam168a
71.443	0.587602	0.420355	1.39787	0.162152	0.999924	Brca2
63.3728	0.546101	0.390747	1.39758	0.162239	0.999924	6530402F18Rik
3427.51	0.149232	0.106831	1.39689	0.162445	0.999924	Cacna2d1
193.742	-0.320721	0.229649	-1.39657	0.162542	0.999924	Atxn7l1
1553.83	0.141789	0.101532	1.39649	0.162566	0.999924	Mon2
165.695	-0.336452	0.241045	-1.39581	0.162772	0.999924	Gask1b
1151.6	0.164783	0.118118	1.39507	0.162994	0.999924	Adipor2
24.7409	-0.875016	0.627638	-1.39414	0.163275	0.999924	Slc47a2
18.0089	1.04729	0.751389	1.3938	0.163377	0.999924	Osgin1
18.7892	1.08747	0.780247	1.39375	0.163392	0.999924	Gm45428
198.837	-0.343445	0.246785	-1.39168	0.16402	0.999924	Mgat5b
57.5425	0.572983	0.411791	1.39144	0.164092	0.999924	Wnt6
417.971	0.24589	0.17673	1.39133	0.164126	0.999924	Cald1
854.707	-0.174797	0.125661	-1.39102	0.164219	0.999924	Syt17
53.7267	-0.591057	0.424909	-1.39102	0.16422	0.999924	Ccdc166
18.9828	1.01095	0.726844	1.39088	0.164263	0.999924	Plvap
846.677	-0.189189	0.136098	-1.39009	0.164501	0.999924	Tomm22
197.768	-0.344926	0.248153	-1.38997	0.164537	0.999924	Rgs5
42.7382	0.669939	0.482044	1.38979	0.164593	0.999924	Car7
366.928	0.244545	0.175981	1.38961	0.164648	0.999924	Sp1
1134.57	0.162838	0.117184	1.38958	0.164655	0.999924	Ptn
403.03	0.229362	0.165077	1.38942	0.164704	0.999924	Paxip1
44.6471	-0.695155	0.500635	-1.38855	0.164971	0.999924	Ppp1r3c
42.2115	0.641039	0.461733	1.38833	0.165035	0.999924	B3gat1
53.7257	-0.582435	0.419742	-1.3876	0.165259	0.999924	Lbhd1
210.942	-1.12456	0.810491	-1.38751	0.165287	0.999924	Gfra3
1407.52	-0.186885	0.134697	-1.38745	0.165305	0.999924	Eif5b
392.754	-0.258322	0.1863	-1.38659	0.165566	0.999924	Cabp1
55.9901	0.570007	0.411229	1.38611	0.165715	0.999924	Tnfrsf22
196.584	0.3249	0.234521	1.38538	0.165938	0.999924	Ulk3
28.0789	-0.804059	0.580834	-1.38432	0.166261	0.999924	Polq
726.708	-0.179146	0.129419	-1.38424	0.166287	0.999924	Tomm40l
630.094	0.201765	0.145799	1.38386	0.166402	0.999924	Agap2
387.354	0.257973	0.186732	1.38152	0.16712	0.999924	Abcb4
51.387	0.626423	0.453609	1.38098	0.167286	0.999924	Rcsd1
4731.56	0.113317	0.082074	1.38067	0.16738	0.999924	Lrrc8b
276.981	0.298326	0.216139	1.38025	0.16751	0.999924	Gpr137c
122.832	0.395589	0.286715	1.37973	0.167671	0.999924	S1pr2
289.973	0.271847	0.197031	1.37972	0.167674	0.999924	Per1
1178.43	-0.158014	0.114573	-1.37916	0.167845	0.999924	Zadh2
2630.72	0.155393	0.112713	1.37867	0.167997	0.999924	Sparcl1
3200.78	-0.128313	0.0930741	-1.37861	0.168014	0.999924	Atp5c1
45.0122	0.805636	0.584838	1.37754	0.168347	0.999924	Mob3b
1333.57	0.148118	0.107531	1.37744	0.168378	0.999924	Plxna2
2905.24	0.131893	0.0957542	1.37741	0.168385	0.999924	Ube4b
351.811	-0.240247	0.174486	-1.37689	0.168548	0.999924	Gucd1
354.666	0.235742	0.171297	1.37622	0.168755	0.999924	Alg14
1116.24	0.186368	0.135423	1.3762	0.168761	0.999924	Ro60
8745.5	0.148421	0.107857	1.37609	0.168794	0.999924	Fasn
742.666	0.192304	0.139875	1.37483	0.169184	0.999924	Abca6
598.939	0.19622	0.142746	1.37461	0.169252	0.999924	Slc4a2
370.932	-0.244941	0.178193	-1.37459	0.16926	0.999924	Pank4
28.1204	0.848614	0.617629	1.37399	0.169446	0.999924	Acvr1c
19.6462	1.0134	0.737729	1.37368	0.169541	0.999924	Fibin
16.5688	-1.06908	0.77832	-1.37357	0.169575	0.999924	Gm44164
4557.32	0.12586	0.0917498	1.37177	0.170134	0.999924	Tns1
24.9388	0.967095	0.705025	1.37172	0.170152	0.999924	Arhgef38
269.247	0.277779	0.202535	1.37151	0.170215	0.999924	Tbc1d25
89.4984	0.45128	0.329197	1.37085	0.170422	0.999924	Gulp1
220.271	0.320299	0.23371	1.37049	0.170533	0.999924	Kank2
1867.36	0.139727	0.101962	1.37039	0.170566	0.999924	Fus
2969.43	0.127983	0.0934147	1.37005	0.170671	0.999924	Mcam
699.202	-0.179574	0.131147	-1.36926	0.170918	0.999924	Ufl1
677.642	-0.192749	0.140774	-1.36921	0.170934	0.999924	Fstl5
280.099	0.265224	0.193709	1.36919	0.17094	0.999924	Myo10
984.606	0.167723	0.122513	1.36902	0.170993	0.999924	Epb41
352.947	0.250687	0.183114	1.36902	0.170993	0.999924	Fam110b
59.5089	-0.563027	0.411561	-1.36803	0.171303	0.999924	Pcdhga4
36.7832	0.730024	0.533663	1.36795	0.171328	0.999924	A330094K24Rik
497.382	0.226322	0.165455	1.36787	0.171351	0.999924	Acot11
154.361	-0.377786	0.276205	-1.36777	0.171384	0.999924	Pop7
28	0.901105	0.659343	1.36667	0.171728	0.999924	Trpv4
63.2868	-0.518027	0.37908	-1.36654	0.17177	0.999924	Cldn9
205.246	-0.314992	0.230514	-1.36648	0.171788	0.999924	Sntb1
883.561	-0.190718	0.139712	-1.36508	0.172229	0.999924	Tbrg1
501.887	-0.23806	0.174427	-1.36481	0.172314	0.999924	Pepd
316.061	-0.244128	0.178917	-1.36448	0.172417	0.999924	Gas8
41.497	-0.681049	0.499248	-1.36415	0.172521	0.999924	Gm10037
202.432	-0.345825	0.25351	-1.36415	0.172521	0.999924	Med27
228.427	0.297079	0.217883	1.36348	0.172731	0.999924	Bach1
1840.13	-0.138902	0.101926	-1.36277	0.172954	0.999924	Tsnax
63.4971	-0.626769	0.459972	-1.36262	0.173001	0.999924	1700030C10Rik
129.99	0.406641	0.298428	1.36261	0.173006	0.999924	Gm16551
101.671	-0.423535	0.311176	-1.36108	0.173489	0.999924	2410006H16Rik
33.6145	0.709578	0.521436	1.36082	0.173572	0.999924	Fadd
249.935	-0.273181	0.200869	-1.35999	0.173832	0.999924	Faim
164.333	0.354165	0.26049	1.35961	0.173954	0.999924	Swt1
387.109	0.252588	0.18583	1.35924	0.17407	0.999924	Sptssa
1815.01	0.132551	0.0975423	1.35891	0.174176	0.999924	Klf9
36.0347	0.718036	0.528859	1.35771	0.174557	0.999924	Crispld1
31.8803	0.797508	0.587476	1.35752	0.174617	0.999924	Pcolce
184.172	0.316031	0.232807	1.35748	0.174629	0.999924	Egfl7
30.8949	0.841734	0.620093	1.35743	0.174644	0.999924	Crispld2
115.222	-0.44718	0.329538	-1.35699	0.174785	0.999924	Mettl25
430.59	-0.257668	0.19005	-1.3558	0.175164	0.999924	Slc9a3r2
298.817	-0.250294	0.184651	-1.3555	0.175259	0.999924	Nfya
1507.05	-0.149503	0.110357	-1.35472	0.175506	0.999924	Minar2
495.211	-0.20913	0.154373	-1.3547	0.175512	0.999924	Polr2g
327.865	-0.277524	0.204986	-1.35387	0.175779	0.999924	E2f3
1325.17	-0.157046	0.116012	-1.3537	0.175833	0.999924	Tsg101
1847.39	0.144946	0.107133	1.35296	0.17607	0.999924	Pabpc1
149.116	-0.344611	0.254734	-1.35283	0.176111	0.999924	Oprl1
3712.99	0.145329	0.107432	1.35275	0.176134	0.999924	Mia3
1012.44	0.215549	0.159364	1.35256	0.176196	0.999924	Ppp1r9a
1814.43	-0.152164	0.112504	-1.35252	0.176208	0.999924	Tmx2
332.439	0.237992	0.175983	1.35235	0.176262	0.999924	Slitrk5
231.063	-0.340304	0.251794	-1.35152	0.17653	0.999924	Slc16a3
17.2919	1.12756	0.834317	1.35148	0.176541	0.999924	Arap3
23.4933	0.851185	0.629849	1.35141	0.176564	0.999924	Kcne3
3859.05	-0.112418	0.0831892	-1.35135	0.176582	0.999924	Stt3b
103.619	-0.42276	0.312851	-1.35132	0.176594	0.999924	Gng8
262.421	-0.287697	0.212949	-1.35101	0.176691	0.999924	Plppr5
6866.06	0.105383	0.0780173	1.35076	0.176773	0.999924	Atrnl1
166.13	0.329449	0.24393	1.35059	0.176827	0.999924	Slc39a1
155.851	0.356237	0.263801	1.3504	0.176888	0.999924	Sdk1
6500.55	0.127668	0.0945425	1.35037	0.176897	0.999924	Ubr4
714.936	0.225976	0.16737	1.35016	0.176966	0.999924	Dmd
85.3679	-0.505481	0.374388	-1.35015	0.176967	0.999924	Gm5165
805.691	-0.207927	0.154024	-1.34997	0.177026	0.999924	Gm13582
183.468	0.399268	0.295869	1.34948	0.177184	0.999924	Ikbip
481.067	-0.217559	0.161225	-1.34941	0.177205	0.999924	Tk2
370.658	0.244292	0.18104	1.34938	0.177214	0.999924	Slc30a7
82.9853	0.475405	0.352631	1.34816	0.177605	0.999924	Trmt61a
2201.69	0.133365	0.0989325	1.34805	0.177644	0.999924	Dip2c
292.3	0.284063	0.210744	1.34791	0.177688	0.999924	Tmem68
33.4178	0.743767	0.552704	1.34569	0.178403	0.999924	Iqcj
1160.95	0.190624	0.141704	1.34523	0.178552	0.999924	Qk
1161.64	-0.167336	0.124425	-1.34488	0.178665	0.999924	Fh1
33.1209	-0.741847	0.551662	-1.34475	0.178706	0.999924	Asb4
1250.49	0.164717	0.12261	1.34343	0.179133	0.999924	Tmf1
259.383	-0.269606	0.200724	-1.34317	0.179218	0.999924	Snrpe
20.7361	-0.919211	0.684619	-1.34266	0.179382	0.999924	Gm50285
7563.09	0.131607	0.0980194	1.34266	0.179382	0.999924	Kcnab1
76.3791	0.469459	0.349659	1.34262	0.179394	0.999924	Tcirg1
77046.8	-0.0961924	0.0716576	-1.34239	0.17947	0.999924	Gnas
146.394	0.400084	0.298043	1.34237	0.179476	0.999924	Gja1
610.554	-0.224379	0.167186	-1.3421	0.179565	0.999924	Syt16
1292.5	0.15526	0.115744	1.34141	0.179788	0.999924	Hnrnpa0
187.439	-0.412223	0.307331	-1.3413	0.179823	0.999924	Nudt17
1414.5	0.142237	0.106059	1.34111	0.179885	0.999924	Hipk1
91.2032	-0.492109	0.366952	-1.34107	0.179898	0.999924	Bcl11a
157.372	-0.351345	0.262	-1.34101	0.179918	0.999924	Zfp382
323.658	0.303991	0.226744	1.34068	0.180025	0.999924	Slc44a5
161.453	0.349048	0.260602	1.33939	0.180444	0.999924	Cdh22
2289.13	-0.130734	0.097649	-1.33882	0.180631	0.999924	Prdx1
1308.01	-0.165247	0.123443	-1.33866	0.180683	0.999924	Eif1
30.1715	0.77296	0.577424	1.33864	0.180689	0.999924	Iqank1
44.5178	-0.66401	0.496305	-1.33791	0.180926	0.999924	Armcx6
131.384	0.365812	0.273445	1.33779	0.180964	0.999924	A530017D24Rik
94.3521	-0.463326	0.346635	-1.33664	0.181339	0.999924	Ripk1
262.295	-0.262583	0.196506	-1.33626	0.181465	0.999924	Clk2
623.804	-0.19935	0.14922	-1.33595	0.181565	0.999924	Moxd1
562.181	0.199189	0.14913	1.33568	0.181654	0.999924	Plpp3
829.57	0.166989	0.125058	1.33529	0.181781	0.999924	Rps25
58.1648	0.566648	0.424427	1.33509	0.181847	0.999924	Kctd15
456.241	0.210637	0.157799	1.33484	0.181928	0.999924	Jam2
151.57	-0.373236	0.279633	-1.33474	0.181963	0.999924	Ctso
1256.48	-0.144265	0.108137	-1.3341	0.182172	0.999924	Mapk8
2149.92	0.143192	0.107384	1.33346	0.18238	0.999924	Myt1l
5488.03	0.140578	0.105437	1.33329	0.182438	0.999924	Pmp22
6373.84	0.141716	0.106316	1.33297	0.182541	0.999924	Apc
146.893	-0.355612	0.266787	-1.33295	0.18255	0.999924	Cpxm2
372.655	0.226529	0.170077	1.33192	0.182887	0.999924	Ttc17
2127.86	0.149382	0.112214	1.33123	0.183115	0.999924	Hdac9
271.14	-0.307125	0.230719	-1.33117	0.183134	0.999924	Nectin1
3312.31	0.122184	0.091807	1.33088	0.18323	0.999924	Bsn
1635.85	-0.159566	0.11992	-1.33061	0.183319	0.999924	Ric8a
227.4	0.313766	0.23588	1.3302	0.183453	0.999924	Necab3
2911.47	-0.1242	0.0934282	-1.32936	0.183729	0.999924	Trp53inp2
364.478	0.236139	0.177708	1.3288	0.183913	0.999924	Grb14
89.1046	-0.441783	0.332473	-1.32878	0.183922	0.999924	Fbxl7
122.886	0.416977	0.313924	1.32827	0.184088	0.999924	Igsf10
234.905	-0.310688	0.234029	-1.32756	0.184323	0.999924	Cpne7
6138.55	0.132928	0.100159	1.32717	0.184454	0.999924	Lnpep
835.683	0.165882	0.125027	1.32677	0.184583	0.999924	Polr3b
73.4825	-0.487964	0.367891	-1.32638	0.184713	0.999924	Gm14295
152.417	0.352309	0.265652	1.32621	0.184772	0.999924	Pbxip1
97.4671	0.421031	0.317478	1.32618	0.184781	0.999924	Ntng2
31.4298	-0.777503	0.586378	-1.32594	0.18486	0.999924	Cenpe
581.115	-0.192081	0.144887	-1.32573	0.184929	0.999924	Fbxo22
1728.75	-0.139758	0.105438	-1.3255	0.185006	0.999924	Kansl3
90.3241	0.567158	0.427925	1.32537	0.185049	0.999924	Gm10790
903.349	0.183577	0.138528	1.3252	0.185105	0.999924	Ophn1
856.903	0.197216	0.148871	1.32474	0.185256	0.999924	Nr1d2
1040.01	-0.166042	0.125394	-1.32417	0.185448	0.999924	BC004004
1101.73	-0.154805	0.116924	-1.32398	0.185509	0.999924	BC031181
428.443	-0.226907	0.171438	-1.32355	0.185653	0.999924	Slco3a1
63.81	-0.497802	0.376191	-1.32327	0.185746	0.999924	Gnb3
193.917	0.377464	0.285325	1.32293	0.18586	0.999924	Mtf2
171.958	-0.342728	0.259445	-1.321	0.1865	0.999924	Zfp667
369.252	-0.276071	0.20904	-1.32066	0.186615	0.999924	Lzts1
2591.27	0.122726	0.0929593	1.32021	0.186763	0.999924	45538
193.549	-0.304711	0.230806	-1.32021	0.186766	0.999924	Rtp1
130.219	0.387064	0.293266	1.31984	0.18689	0.999924	Kdm2b
1591.17	-0.13405	0.10158	-1.31965	0.186953	0.999924	Osbp
925.056	0.16374	0.124154	1.31884	0.187222	0.999924	Pkn1
789.891	0.170228	0.129079	1.31879	0.187241	0.999924	Slc9a1
104.098	0.420734	0.319054	1.31869	0.187273	0.999924	Aldh1b1
2790.03	0.12354	0.0936914	1.31858	0.187309	0.999924	Marcks
274.936	0.323492	0.245609	1.3171	0.187805	0.999924	Fbn1
86.578	-0.467377	0.354864	-1.31706	0.187818	0.999924	Gm43398
472.925	-0.208661	0.158469	-1.31673	0.18793	0.999924	Rnase4
922.854	-0.159528	0.121175	-1.31651	0.188004	0.999924	Men1
342.35	0.279976	0.212677	1.31644	0.188027	0.999924	Plekha4
179.023	0.320899	0.243814	1.31616	0.18812	0.999924	Ifnar2
19.0577	1.08725	0.826107	1.31611	0.188136	0.999924	Fmo2
815.821	0.169234	0.128602	1.31596	0.188188	0.999924	Vash1
95.5055	0.496418	0.377244	1.31591	0.188206	0.999924	Zfp759
540.794	0.214775	0.163265	1.3155	0.188342	0.999924	Lancl3
2547.72	0.134788	0.102462	1.31549	0.188347	0.999924	Cep170b
187.483	0.315214	0.239807	1.31445	0.188695	0.999924	Camkmt
261.907	0.257098	0.195619	1.31428	0.188753	0.999924	Traf6
1528.29	0.168479	0.128193	1.31426	0.188758	0.999924	Nbeal1
1020.02	-0.157476	0.119826	-1.31421	0.188777	0.999924	Fnta
10051.3	-0.0987908	0.0752011	-1.31369	0.188951	0.999924	Cadm1
127.61	-0.36786	0.280115	-1.31325	0.1891	0.999924	Tmed2
680.364	0.207203	0.157931	1.31199	0.189525	0.999924	Pitrm1
1100.28	-0.156128	0.119018	-1.3118	0.189588	0.999924	Auh
23.7236	-0.829664	0.633085	-1.31051	0.190024	0.999924	Aoc2
380.36	-0.309124	0.235898	-1.31041	0.190057	0.999924	C78859
5967.86	0.108083	0.0824916	1.31023	0.190117	0.999924	Synm
201.557	0.329243	0.251292	1.3102	0.190129	0.999924	Nav2
1076.65	-0.168468	0.128651	-1.30949	0.190367	0.999924	Ppib
148.069	0.448771	0.342829	1.30902	0.190526	0.999924	Whamm
36.6964	0.651693	0.498022	1.30856	0.190682	0.999924	Rreb1
40.6165	0.632706	0.483646	1.3082	0.190805	0.999924	Cyb5rl
565.938	0.186974	0.142961	1.30787	0.190918	0.999924	Arid5b
2855.68	0.12711	0.0971919	1.30783	0.190931	0.999924	Fryl
1570.47	0.150415	0.115095	1.30688	0.191253	0.999924	Ctnnd2
1447.47	0.148961	0.11403	1.30633	0.19144	0.999924	Ankrd27
1243.42	-0.157236	0.120375	-1.30622	0.191476	0.999924	Brd9
28.6292	-0.732243	0.560859	-1.30557	0.191698	0.999924	Rasgef1c
57.4099	0.592362	0.453737	1.30552	0.191716	0.999924	Medag
247.214	-0.289555	0.221824	-1.30534	0.191779	0.999924	Bcl10
160.938	-0.334073	0.25605	-1.30472	0.19199	0.999924	Zfp1
2199.57	0.147997	0.113432	1.30471	0.19199	0.999924	Plce1
148.069	-0.335589	0.257483	-1.30334	0.192458	0.999924	Zfp286
239.442	-0.274518	0.210787	-1.30235	0.192796	0.999924	Zfp219
855.52	0.18739	0.143917	1.30207	0.192893	0.999924	Hs2st1
17.5235	1.30929	1.00606	1.3014	0.193121	0.999924	Hbb-bs
344.72	-0.236967	0.182177	-1.30075	0.193343	0.999924	Nudt5
724.098	0.186146	0.143114	1.30068	0.193367	0.999924	Adamts5
230.448	-0.28861	0.221899	-1.30064	0.193382	0.999924	Ttc38
225.974	0.288589	0.221973	1.30011	0.193564	0.999924	Qtrt2
144.161	0.334048	0.257003	1.29978	0.193675	0.999924	Gpr137b
3629.77	0.114819	0.0883519	1.29956	0.193752	0.999924	Cic
63.7997	0.500365	0.385052	1.29948	0.193781	0.999924	Ltbp4
1503.62	0.139049	0.107021	1.29927	0.19385	0.999924	Efr3a
167.3	0.325382	0.250562	1.29861	0.194078	0.999924	Ptpn21
183.61	-0.303899	0.234021	-1.2986	0.194081	0.999924	Fam185a
3618.96	0.136557	0.105159	1.29858	0.194089	0.999924	Arhgef12
60.2542	-0.56377	0.434179	-1.29847	0.194125	0.999924	Myo5b
2622.28	-0.122093	0.0940377	-1.29835	0.194169	0.999924	Araf
80.5322	-0.448773	0.345688	-1.2982	0.194218	0.999924	Rasl11a
2014.32	-0.14128	0.10894	-1.29686	0.19468	0.999924	Cyb5r1
427.274	0.214576	0.165459	1.29685	0.194683	0.999924	Hip1r
294.009	-0.264249	0.203819	-1.29649	0.194807	0.999924	Isyna1
341.842	0.246425	0.190157	1.2959	0.195009	0.999924	Daxx
37.4625	-0.64091	0.495406	-1.29371	0.195767	0.999924	Myo16
4540.58	-0.137947	0.106652	-1.29344	0.195861	0.999924	Lgals1
382.618	-0.243573	0.188318	-1.29342	0.195867	0.999924	Lrrc57
1271.78	-0.142639	0.110281	-1.29341	0.195868	0.999924	Ranbp9
2483.61	-0.125684	0.0972683	-1.29214	0.196309	0.999924	Txn1
81.6475	-0.441984	0.342236	-1.29146	0.196544	0.999924	1700052K11Rik
2781.55	-0.119343	0.0924447	-1.29097	0.196715	0.999924	Morf4l2
549.952	0.214574	0.166218	1.29091	0.196733	0.999924	Itprid2
202.934	-0.279128	0.216258	-1.29072	0.196801	0.999924	Mettl7a1
230.708	-0.278728	0.215961	-1.29064	0.196828	0.999924	Ripk2
52.9735	-0.556223	0.431028	-1.29046	0.196892	0.999924	Galr1
1136.65	-0.174623	0.135353	-1.29012	0.197008	0.999924	Vip
670.793	0.175567	0.136092	1.29006	0.197028	0.999924	Tes
2622.09	0.122934	0.0953091	1.28985	0.197103	0.999924	Polr2a
56.7768	-0.519376	0.402683	-1.28979	0.197124	0.999924	Dclre1b
105.985	0.483167	0.374651	1.28965	0.197174	0.999924	Itgb3
447.55	0.222682	0.1727	1.28942	0.197254	0.999924	Tma7
103.524	0.393721	0.305606	1.28833	0.197632	0.999924	Vcpkmt
25.7311	0.830811	0.645186	1.28771	0.197848	0.999924	BC055324
563.728	0.281186	0.218381	1.2876	0.197886	0.999924	Fam199x
488.014	-0.203716	0.158243	-1.28736	0.197968	0.999924	Tomm7
82.1101	-0.46749	0.363317	-1.28673	0.198189	0.999924	Efhc1
210.419	0.301734	0.23458	1.28628	0.198347	0.999924	Sox12
2512.19	0.131256	0.10205	1.28619	0.198375	0.999924	Nat8l
793.184	0.160612	0.1249	1.28593	0.198467	0.999924	Slitrk3
76.4505	0.523814	0.407466	1.28554	0.198604	0.999924	Acss1
60.1886	-0.530752	0.413149	-1.28465	0.198915	0.999924	Gen1
1075.92	-0.150005	0.11679	-1.2844	0.199002	0.999924	Spire1
437.859	-0.231102	0.180083	-1.28331	0.199383	0.999924	Cib2
1377.53	-0.148226	0.11556	-1.28268	0.199604	0.999924	Slc2a13
580.402	-0.182181	0.142209	-1.28108	0.200164	0.999924	Ntan1
93.552	0.471072	0.367867	1.28055	0.200351	0.999924	Hmcn1
53.5707	0.55059	0.429987	1.28048	0.200376	0.999924	Nlrc5
24.9331	0.831252	0.649254	1.28032	0.200433	0.999924	Tgif2
500.113	0.218339	0.17056	1.28013	0.2005	0.999924	Aasdhppt
871.938	0.157795	0.123297	1.2798	0.200615	0.999924	Abl2
1291.06	-0.15113	0.11809	-1.27978	0.200621	0.999924	Smyd2
162.459	-0.339918	0.26562	-1.27972	0.200645	0.999924	Mkks
608.482	-0.182819	0.142886	-1.27948	0.200728	0.999924	Itpripl2
27.1315	0.792042	0.61942	1.27868	0.201009	0.999924	Cdca3
58.9269	0.513274	0.401662	1.27788	0.201293	0.999924	Atad5
1420.1	-0.141256	0.110554	-1.27771	0.201352	0.999924	Rexo2
35.3224	0.647334	0.506756	1.27741	0.201459	0.999924	Cd46
29.4555	-0.728868	0.570616	-1.27734	0.201483	0.999924	5330438D12Rik
669.177	0.187417	0.146761	1.27702	0.201595	0.999924	Aptx
134.531	0.350856	0.274807	1.27674	0.201695	0.999924	Napepld
259.275	0.265039	0.207597	1.2767	0.201708	0.999924	Zfp672
337.483	0.234134	0.183462	1.2762	0.201885	0.999924	Txnrd3
233.807	0.281974	0.221018	1.2758	0.202027	0.999924	Tigd2
1090.42	-0.153101	0.120024	-1.27559	0.202102	0.999924	Apold1
269.496	0.258239	0.202452	1.27556	0.202111	0.999924	Lrfn4
27.4498	0.737521	0.578277	1.27538	0.202176	0.999924	D430040D24Rik
3353.87	0.112695	0.0883913	1.27495	0.202326	0.999924	Peg13
20.1814	-1.16811	0.916875	-1.27402	0.202657	0.999924	4933431K14Rik
252.747	-0.303563	0.238307	-1.27383	0.202723	0.999924	Nsmce3
443.78	-0.221002	0.173574	-1.27325	0.202931	0.999924	Tor1aip1
350.16	0.231072	0.181633	1.27219	0.203307	0.999924	Gpr37l1
186.669	-0.291375	0.229075	-1.27197	0.203386	0.999924	Adam17
740.401	-0.177541	0.139653	-1.27131	0.20362	0.999924	Tmem87a
49.9219	0.543566	0.427751	1.27075	0.203817	0.999924	Trim47
57.5704	-0.499893	0.393389	-1.27073	0.203823	0.999924	Tmem132c
2514.24	-0.127436	0.100292	-1.27065	0.203853	0.999924	Ndrg3
918.53	0.188178	0.148113	1.2705	0.203905	0.999924	Med12l
59.2362	0.499942	0.393668	1.26996	0.2041	0.999924	Glb1l2
96.3023	0.532331	0.419254	1.26971	0.204189	0.999924	Mocos
430.037	-0.248894	0.196121	-1.26908	0.204412	0.999924	Tmem70
20398	-0.114451	0.0902548	-1.26809	0.204766	0.999924	Atp5b
38.8005	-0.688946	0.543574	-1.26744	0.204999	0.999924	Psmb9
23.2995	0.857393	0.676639	1.26713	0.205107	0.999924	Il16
188.695	0.288182	0.227528	1.26658	0.205307	0.999924	Zfp27
295.716	-0.234865	0.185557	-1.26573	0.20561	0.999924	Cby1
456.088	-0.196125	0.154972	-1.26555	0.205674	0.999924	Ndufaf1
873.76	-0.202811	0.160261	-1.26551	0.205689	0.999924	Ndufb1-ps
8906.63	-0.0971429	0.0767988	-1.2649	0.205907	0.999924	Mdh1
83.1587	-0.416578	0.329455	-1.26445	0.20607	0.999924	Metrnl
66.3698	0.572766	0.452979	1.26444	0.206072	0.999924	Sst
626.325	-0.184989	0.146302	-1.26443	0.206077	0.999924	Slc25a17
525.037	0.197284	0.156036	1.26435	0.206105	0.999924	Senp7
636.829	0.209041	0.165508	1.26303	0.20658	0.999924	Mboat2
2216.69	-0.121711	0.0963699	-1.26295	0.206605	0.999924	Cttn
39816.3	-0.110724	0.0876753	-1.26289	0.20663	0.999924	mt-Nd2
3717.31	-0.11394	0.0902445	-1.26257	0.206742	0.999924	Coro2a
5409.57	0.122536	0.0970614	1.26246	0.206782	0.999924	Negr1
70.3751	-0.470075	0.372467	-1.26206	0.206927	0.999924	Fam221b
44.5404	0.569475	0.451428	1.2615	0.20713	0.999924	Alox12b
408.145	-0.219629	0.174111	-1.26143	0.207154	0.999924	Gm2a
48.1348	0.566452	0.449408	1.26044	0.20751	0.999924	Tceanc
62.2363	0.496865	0.394272	1.26021	0.207594	0.999924	Tex30
18.9354	-0.985173	0.781755	-1.26021	0.207595	0.999924	Crhbp
998.293	-0.156344	0.124063	-1.2602	0.207598	0.999924	Tmem246
161.463	-0.356065	0.282692	-1.25955	0.207831	0.999924	Slc30a6
3212.55	0.146271	0.116149	1.25934	0.207909	0.999924	Ptprf
123.816	0.384332	0.30525	1.25907	0.208004	0.999924	Limd1
393.211	0.21788	0.173049	1.25907	0.208006	0.999924	Map3k5
1132.91	-0.149271	0.118569	-1.25893	0.208054	0.999924	Pqlc3
1025.44	-0.14933	0.118639	-1.2587	0.20814	0.999924	45359
282.756	0.239854	0.19056	1.25868	0.208146	0.999924	Krtcap2
182.712	0.287526	0.228451	1.25859	0.20818	0.999924	Racgap1
27.4025	-0.712497	0.566297	-1.25817	0.208331	0.999924	Gm31698
1370.5	-0.507259	0.403391	-1.25749	0.208577	0.999924	Wls
341.32	-0.228104	0.18144	-1.25719	0.208686	0.999924	Pex1
115.13	-0.370382	0.294737	-1.25665	0.20888	0.999924	Mrpl34
27422.3	-0.131184	0.104415	-1.25637	0.208982	0.999924	mt-Nd4
826.569	0.171673	0.136691	1.25592	0.209147	0.999924	Tep1
983.585	-0.150723	0.120037	-1.25563	0.209249	0.999924	Slc7a8
2543.68	-0.185902	0.148056	-1.25562	0.209253	0.999924	Capn5
57.462	0.527793	0.420397	1.25546	0.209311	0.999924	Gm49678
6010.31	-0.115551	0.0920467	-1.25535	0.209353	0.999924	Dpysl2
298.896	0.241659	0.192521	1.25523	0.209395	0.999924	Syne2
130.714	-0.387744	0.309011	-1.25479	0.209555	0.999924	Zfp982
28.8628	-0.73753	0.587884	-1.25455	0.209642	0.999924	C030014I23Rik
1344.73	-0.133034	0.106041	-1.25455	0.209642	0.999924	Socs2
103.122	0.407318	0.324686	1.2545	0.209661	0.999924	Rpia
81.1252	0.487642	0.388718	1.25449	0.209665	0.999924	Nemp1
16690.5	-0.0999333	0.0796962	-1.25393	0.209868	0.999924	Tmsb4x
81.0001	0.431095	0.343847	1.25374	0.209937	0.999924	Angptl6
113.076	0.388178	0.309705	1.25338	0.210067	0.999924	Alg13
839.655	0.159631	0.127426	1.25273	0.210303	0.999924	Cpne8
17.4648	0.985534	0.786791	1.2526	0.210351	0.999924	Efnb3
1517.69	0.144823	0.115631	1.25246	0.210404	0.999924	Fam32a
193.272	0.357234	0.285274	1.25225	0.210479	0.999924	Pcdha12
199.979	-0.275128	0.219783	-1.25181	0.210637	0.999924	Nip7
206.904	0.286545	0.228934	1.25165	0.210698	0.999924	Iah1
448.182	-0.275665	0.220272	-1.25148	0.210761	0.999924	AI837181
592.252	0.202698	0.162005	1.25118	0.210868	0.999924	Slitrk2
541.738	0.19331	0.15452	1.25104	0.210921	0.999924	Hlcs
38.8805	0.60054	0.480454	1.24994	0.21132	0.999924	Lck
121.488	-0.386249	0.309237	-1.24904	0.211651	0.999924	Zfp729b
280.298	-0.245591	0.196657	-1.24882	0.211729	0.999924	Ndufs5
1828.19	-0.131877	0.105611	-1.24871	0.211773	0.999924	Rnf19a
100.895	0.384586	0.307994	1.24868	0.211783	0.999924	Mettl17
2664.23	0.170261	0.136361	1.24861	0.21181	0.999924	Sacs
157.454	-0.373724	0.29943	-1.24811	0.211989	0.999924	Wrap73
226.749	0.267032	0.214013	1.24774	0.212127	0.999924	Sulf2
112.843	-0.362482	0.29059	-1.2474	0.212251	0.999924	Zcwpw1
74.8483	-0.460259	0.369053	-1.24713	0.212348	0.999924	2010320M18Rik
753.206	0.180008	0.144377	1.24679	0.212474	0.999924	Shisal1
1486.94	0.128104	0.102764	1.24658	0.212552	0.999924	Large1
627.113	-0.176635	0.141724	-1.24633	0.212641	0.999924	Khdrbs3
93.7997	-0.400981	0.321822	-1.24597	0.212775	0.999924	Apool
1262.95	-0.144151	0.115831	-1.24449	0.213318	0.999924	Tmeff1
7476.33	0.105437	0.0847267	1.24443	0.21334	0.999924	Bmpr2
16.9558	0.900163	0.723361	1.24442	0.213346	0.999924	Gm44089
200.15	-0.280097	0.22516	-1.24399	0.213502	0.999924	Ttc39a
231.375	0.295129	0.237322	1.24358	0.213654	0.999924	Fam160b2
16.5918	0.955199	0.76811	1.24357	0.213658	0.999924	Zfp184
2985.07	0.116867	0.0940727	1.2423	0.214125	0.999924	Cpeb2
2955.41	0.130938	0.105493	1.24119	0.214534	0.999924	Serpina3n
1024.76	0.193656	0.156055	1.24094	0.214627	0.999924	Sesn3
158.964	0.349725	0.281867	1.24074	0.2147	0.999924	Hps4
17.3904	0.959627	0.773461	1.24069	0.21472	0.999924	Gm7694
288.2	0.263496	0.21242	1.24045	0.214809	0.999924	Pcgf2
241.456	0.28535	0.230082	1.24021	0.214899	0.999924	Spata7
36.928	-0.608054	0.490408	-1.23989	0.215015	0.999924	Nat8f1
19.6945	0.879923	0.710103	1.23915	0.215291	0.999924	Pde2a
98.949	0.407401	0.328858	1.23884	0.215406	0.999924	Shank2
674.395	0.172472	0.139229	1.23876	0.215433	0.999924	Csmd2
118.342	0.376682	0.304116	1.23861	0.215489	0.999924	Nck2
28.333	0.737214	0.595371	1.23824	0.215626	0.999924	Gm10461
1715.67	-0.126429	0.102123	-1.23801	0.215713	0.999924	Tmcc3
102.709	0.383082	0.309523	1.23765	0.215845	0.999924	Adamts9
435.808	0.215211	0.17391	1.23748	0.215907	0.999924	Slc24a3
1536.56	0.133962	0.108258	1.23744	0.215924	0.999924	Stxbp5
90.6172	-0.480218	0.388161	-1.23716	0.216027	0.999924	Acot8
493.246	0.189778	0.153399	1.23715	0.216032	0.999924	Plekha3
358.185	-0.237431	0.191947	-1.23697	0.2161	0.999924	Mipep
330.806	-0.227335	0.183803	-1.23684	0.216145	0.999924	Mrap2
400.144	0.213023	0.172271	1.23656	0.216251	0.999924	Ddx52
346.889	-0.240486	0.194509	-1.23638	0.216319	0.999924	Adcy3
17.1136	-1.17344	0.949141	-1.23632	0.216341	0.999924	Gm38593
1812.71	-0.12204	0.0987166	-1.23627	0.216359	0.999924	Tomm34
2507.24	-0.113458	0.0918023	-1.23589	0.216499	0.999924	Pja1
508.777	0.186307	0.150779	1.23563	0.216596	0.999924	Slit3
1660.16	-0.138847	0.112369	-1.23563	0.216596	0.999924	Npc2
128.35	0.391258	0.316678	1.23551	0.216642	0.999924	Lin52
86.5277	-0.41031	0.332107	-1.23548	0.216654	0.999924	Dact1
308.883	-0.245109	0.198429	-1.23525	0.216739	0.999924	Pfdn6
150.697	-0.315892	0.255978	-1.23406	0.217182	0.999924	Gmppb
42.5729	-0.6082	0.493123	-1.23336	0.21744	0.999924	Gm50387
171.453	0.304256	0.246744	1.23308	0.217544	0.999924	Ing3
9427.45	0.104983	0.0851646	1.23271	0.217685	0.999924	Lifr
402.139	-0.22215	0.180224	-1.23263	0.217713	0.999924	Timm13
2672.4	0.128989	0.104663	1.23242	0.217791	0.999924	Inpp4a
139.956	0.361531	0.293387	1.23227	0.21785	0.999924	Pcdhb22
605.82	-0.188281	0.152831	-1.23196	0.217964	0.999924	Ecd
637.474	0.174631	0.141758	1.23189	0.21799	0.999924	Bahd1
185.51	-0.298307	0.242206	-1.23162	0.21809	0.999924	Psmb8
1074.63	0.14793	0.120139	1.23133	0.218201	0.999924	Srgap1
26.785	0.735377	0.597491	1.23077	0.218407	0.999924	Kcna3
208.288	0.308503	0.250832	1.22992	0.218726	0.999924	Uty
38.1762	0.688479	0.55998	1.22947	0.218896	0.999924	0610040J01Rik
579.803	-0.175652	0.142894	-1.22925	0.21898	0.999924	Dis3l
178.102	-0.322241	0.26215	-1.22922	0.218988	0.999924	Incenp
920.81	0.19123	0.155678	1.22837	0.219308	0.999924	Serping1
143.545	0.320596	0.261075	1.22798	0.219454	0.999924	Phgdh
59.9285	0.485626	0.39551	1.22785	0.219504	0.999924	Stk33
491.372	-0.206367	0.168073	-1.22784	0.219508	0.999924	Ar
428.223	0.24197	0.197099	1.22766	0.219575	0.999924	Irgm1
111.063	-0.360102	0.293394	-1.22736	0.219685	0.999924	Mrgbp
760.386	0.209389	0.170614	1.22727	0.219722	0.999924	Tmem158
161.636	0.316068	0.257638	1.22679	0.219901	0.999924	Ppp1r14c
534.987	0.210398	0.171508	1.22675	0.219917	0.999924	Ptprd
287.667	0.247356	0.201641	1.22672	0.219929	0.999924	Pole3
561.44	0.188415	0.153666	1.22613	0.22015	0.999924	Mgat1
2221.67	0.127002	0.103586	1.22606	0.220178	0.999924	Snrnp200
269.926	-0.273309	0.22296	-1.22582	0.220268	0.999924	Mvb12a
93.5868	-0.383604	0.313094	-1.2252	0.220498	0.999924	Immp2l
5236.68	0.146544	0.119611	1.22518	0.220508	0.999924	Egr1
1987.18	0.119825	0.0978233	1.22491	0.220608	0.999924	Zswim8
548.421	0.249423	0.203738	1.22423	0.220864	0.999924	Nptx2
927.091	0.152385	0.124512	1.22386	0.221005	0.999924	Phtf1
481.886	-0.207467	0.169531	-1.22377	0.221038	0.999924	Dad1
164.967	-0.375913	0.307342	-1.22311	0.221287	0.999924	Nrip2
157.413	0.319574	0.261479	1.22218	0.221641	0.999924	Zhx2
324.275	-0.227489	0.186193	-1.22179	0.221786	0.999924	Slc15a4
26.6226	3.28048	2.68569	1.22147	0.22191	0.999924	Ptprc
34.6581	0.669052	0.547753	1.22145	0.221916	0.999924	Acta1
185.223	0.324561	0.265855	1.22082	0.222154	0.999924	Hes1
972.66	0.173054	0.141793	1.22047	0.222288	0.999924	45356
330.172	0.262686	0.215303	1.22007	0.222437	0.999924	Haus6
114.479	0.346663	0.284228	1.21966	0.222593	0.999924	Ago4
230.039	0.251511	0.206226	1.21959	0.222621	0.999924	Nelfa
241.202	-0.281552	0.230933	-1.21919	0.222771	0.999924	4921524J17Rik
622.425	-0.196681	0.161332	-1.2191	0.222805	0.999924	Zcchc17
26.8998	-0.933637	0.766097	-1.21869	0.22296	0.999924	Pear1
239.27	-0.261901	0.214991	-1.21819	0.223151	0.999924	Cers6
66.2547	0.471428	0.387155	1.21767	0.223349	0.999924	Pcdhb13
87.9398	0.408038	0.335215	1.21724	0.223512	0.999924	Pcdhb16
19.9082	0.873156	0.71734	1.21721	0.223523	0.999924	Gpr39
22.3253	0.961169	0.789906	1.21682	0.223674	0.999924	A530083I20Rik
70.9991	0.447022	0.367385	1.21677	0.223693	0.999924	Tiam1
789.95	0.160039	0.131548	1.21658	0.223764	0.999924	Cdk13
807.077	-0.170115	0.139843	-1.21647	0.223805	0.999924	Rgs7
90.7297	-0.483542	0.397814	-1.2155	0.224176	0.999924	Siah3
20.2279	5.22197	4.29654	1.21539	0.224217	0.999924	Trdc
99.4006	0.378968	0.311893	1.21506	0.224344	0.999924	Ak6
51.3956	0.507456	0.417679	1.21494	0.224388	0.999924	Insc
2205.15	0.115801	0.0953264	1.21479	0.224448	0.999924	Hecw1
208.377	-0.278464	0.229245	-1.2147	0.22448	0.999924	Sncaip
913.873	-0.145664	0.119942	-1.21445	0.224577	0.999924	Emc8
3725.83	0.119996	0.0988169	1.21432	0.224624	0.999924	Selenot
600.407	-0.182451	0.150265	-1.2142	0.224673	0.999924	Leo1
1077.13	-0.147323	0.121341	-1.21413	0.224699	0.999924	Arhgap1
32.3459	0.665614	0.548363	1.21382	0.224816	0.999924	Prlr
53.4392	0.578671	0.476741	1.21381	0.224822	0.999924	Zfp937
4295.56	0.108255	0.0892122	1.21346	0.224955	0.999924	Prrc2a
1142.65	0.135948	0.112037	1.21342	0.224968	0.999924	Sugp2
670.625	-0.164465	0.135561	-1.21322	0.225047	0.999924	P4ha1
58.9409	0.555766	0.458107	1.21318	0.225061	0.999924	Slc16a14
1119.05	-0.151587	0.124985	-1.21284	0.22519	0.999924	Ndufb6
141.105	0.324099	0.267277	1.21259	0.225286	0.999924	Ifitm3
198.99	0.285672	0.235601	1.21252	0.225312	0.999924	Ormdl2
2567.95	0.116914	0.0964388	1.21232	0.225392	0.999924	Ppm1l
1969.37	0.117655	0.0970713	1.21204	0.225496	0.999924	Atrn
26.3667	-0.717673	0.592227	-1.21182	0.22558	0.999924	Gm15510
75.0468	-0.453896	0.37457	-1.21178	0.225597	0.999924	1700030J22Rik
516.267	0.181785	0.150058	1.21143	0.22573	0.999924	Snx9
401.854	-0.212466	0.175399	-1.21133	0.22577	0.999924	Ftl1
76.6869	-0.453872	0.374941	-1.21052	0.22608	0.999924	Tagln
227.669	-0.273563	0.226005	-1.21043	0.226114	0.999924	B230217C12Rik
2953.62	-0.127087	0.105025	-1.21006	0.226255	0.999924	Uqcrh
200.055	0.269483	0.222725	1.20994	0.226303	0.999924	Haus8
734.269	0.169584	0.140172	1.20983	0.226346	0.999924	Mtr
2450.35	-0.13086	0.108186	-1.20958	0.22644	0.999924	Actr10
1874.82	-0.122076	0.100961	-1.20914	0.226609	0.999924	Tfrc
86.9904	0.416996	0.344887	1.20908	0.226631	0.999924	Lipe
815.944	0.154776	0.128032	1.20889	0.226704	0.999924	Wwc2
21.0438	-0.798049	0.66016	-1.20887	0.226712	0.999924	Gm38372
125.702	0.342688	0.283585	1.20842	0.226888	0.999924	Pqlc2
666.293	0.206427	0.170905	1.20785	0.227106	0.999924	Ptar1
2163.77	-0.128279	0.106221	-1.20766	0.227178	0.999924	Tusc3
314.564	0.242934	0.20118	1.20755	0.227222	0.999924	Rpgrip1l
80.7396	-0.413952	0.342897	-1.20722	0.227348	0.999924	Snhg8
273.88	-0.284754	0.23591	-1.20704	0.227415	0.999924	Uckl1
500.917	-0.178981	0.14829	-1.20697	0.227443	0.999924	Mrps17
311.598	-0.238014	0.197211	-1.2069	0.227469	0.999924	Sgce
4288.22	0.102289	0.0847703	1.20666	0.227562	0.999924	Synj1
31.0475	0.678541	0.562941	1.20535	0.228068	0.999924	Bora
222.07	-0.258795	0.214742	-1.20515	0.228146	0.999924	Vamp3
143.201	0.369342	0.306583	1.20471	0.228316	0.999924	BC034090
906.688	-0.186744	0.15504	-1.20449	0.228401	0.999924	Samd9l
621.733	0.197396	0.163885	1.20448	0.228404	0.999924	Ptch1
525.295	0.204192	0.169609	1.2039	0.22863	0.999924	Jak2
14673.1	-0.099344	0.0825246	-1.20381	0.228663	0.999924	Atp5a1
1055.88	-0.159693	0.132688	-1.20352	0.228775	0.999924	Atl2
88.9121	0.421895	0.350564	1.20348	0.228792	0.999924	Dpf1
160.482	0.350712	0.291579	1.2028	0.229053	0.999924	Tatdn3
1363.65	-0.127183	0.105787	-1.20225	0.229268	0.999924	Vdac3
1656.34	-0.121904	0.101402	-1.20219	0.229291	0.999924	Chmp5
1508.28	0.136963	0.113956	1.20189	0.229406	0.999924	Phkb
54.6397	0.539953	0.44927	1.20184	0.229424	0.999924	Xkr7
100.167	0.402581	0.334985	1.20179	0.229445	0.999924	Lrrk1
4815.6	-0.0979807	0.0815411	-1.20161	0.229514	0.999924	Ppm1h
120.615	-0.341219	0.283974	-1.20158	0.229525	0.999924	Pgf
209.35	-0.280868	0.233757	-1.20154	0.229543	0.999924	Frzb
148.002	0.359489	0.299212	1.20145	0.229576	0.999924	Zbtb5
461.84	-0.188785	0.157136	-1.20141	0.229592	0.999924	Fam76a
5062.38	0.111066	0.0924478	1.2014	0.229598	0.999924	Ubr3
30.3975	-0.673564	0.560857	-1.20096	0.229768	0.999924	A630052C17Rik
159.321	-0.300205	0.250006	-1.20079	0.229832	0.999924	A330084C13Rik
2020.38	-0.12021	0.100128	-1.20056	0.229921	0.999924	Arhgef9
221.639	-0.319182	0.265954	-1.20014	0.230084	0.999924	Mrpl57
169.358	0.298302	0.248561	1.20011	0.230095	0.999924	Ccdc71l
2977.3	0.119381	0.0994895	1.19993	0.230165	0.999924	Abca5
173.319	-0.320974	0.267508	-1.19987	0.23019	0.999924	Ncapg2
44.4828	-0.675793	0.563257	-1.19979	0.230219	0.999924	Mettl18
20.1952	-0.78463	0.654061	-1.19963	0.230284	0.999924	Gm37397
323.527	0.218071	0.181798	1.19952	0.230325	0.999924	Mcmbp
67.0113	-0.438358	0.365524	-1.19926	0.230427	0.999924	Ccdc84
328.976	0.223293	0.186214	1.19912	0.230482	0.999924	Pim3
206.072	-0.265954	0.221963	-1.19819	0.230842	0.999924	Bclaf3
981.818	0.179006	0.149438	1.19786	0.23097	0.999924	Fmr1
298.993	-0.247457	0.206738	-1.19696	0.231322	0.999924	Ap5z1
2999.96	-0.120908	0.101104	-1.19589	0.231741	0.999924	Tmem130
239.641	-0.255765	0.213872	-1.19588	0.231743	0.999924	Dyrk1b
2220.74	0.141058	0.117957	1.19585	0.231757	0.999924	Elmo1
2606.78	-0.11882	0.0993734	-1.19569	0.231817	0.999924	Ahi1
3023.11	0.114141	0.0954701	1.19557	0.231866	0.999924	Tanc2
935.334	0.179552	0.150213	1.19532	0.231963	0.999924	Edem3
261.6	-0.262528	0.219673	-1.19508	0.232054	0.999924	Trmt6
43.298	0.619716	0.518619	1.19493	0.232113	0.999924	Sardh
236.656	-0.245626	0.205669	-1.19428	0.23237	0.999924	Pald1
21.8306	-0.810745	0.679115	-1.19383	0.232546	0.999924	Vmn2r57
22.4771	-0.777092	0.651226	-1.19328	0.232761	0.999924	Slc37a2
617.147	0.16619	0.13928	1.1932	0.23279	0.999924	Epb41l2
695.843	-0.16847	0.141202	-1.19312	0.232824	0.999924	Trmt1l
1764.23	-0.126362	0.10592	-1.193	0.232871	0.999924	Paics
820.083	-0.196092	0.164371	-1.19299	0.232874	0.999924	Col4a2
464.837	-0.181888	0.152511	-1.19262	0.233017	0.999924	Borcs7
588.092	-0.254713	0.213659	-1.19215	0.233204	0.999924	Peg10
949.049	-0.14435	0.121125	-1.19174	0.233362	0.999924	Manf
501.506	-0.223675	0.187719	-1.19154	0.23344	0.999924	Dek
152.658	0.329886	0.276892	1.19139	0.233502	0.999924	Ypel2
810.922	-0.167424	0.140538	-1.19131	0.233531	0.999924	Pgs1
98.1509	-0.367033	0.308113	-1.19123	0.233563	0.999924	Bmf
778.654	0.152526	0.128042	1.19122	0.233568	0.999924	Ttc39c
2628.26	-0.122682	0.103007	-1.19101	0.23365	0.999924	Npy2r
106.455	-0.508247	0.426753	-1.19096	0.233668	0.999924	Tle3
1036.47	-0.155	0.130153	-1.19091	0.23369	0.999924	Mfn1
8626.81	0.108873	0.0914663	1.19031	0.233925	0.999924	Elavl2
175.577	0.310932	0.261291	1.18998	0.234052	0.999924	Rmi1
474.617	-0.181278	0.152349	-1.18989	0.23409	0.999924	Rnf111
260.701	-0.269622	0.226754	-1.18905	0.234421	0.999924	Cbr4
196.44	0.289123	0.243163	1.18901	0.234437	0.999924	Rev1
457.354	0.211758	0.178128	1.18879	0.234521	0.999924	Parn
132.314	0.329936	0.277541	1.18878	0.234526	0.999924	Cbx3
239.647	0.253116	0.21297	1.18851	0.234634	0.999924	Bcl7c
978.535	0.159147	0.13393	1.18828	0.234722	0.999924	Upf1
413.813	-0.190606	0.160472	-1.18778	0.23492	0.999924	Mrpl24
98.5751	-0.365617	0.307844	-1.18767	0.234965	0.999924	Zfp395
39.4937	0.575195	0.484478	1.18725	0.235129	0.999924	Gm39244
155.509	0.305888	0.257722	1.18689	0.235271	0.999924	Kcnmb4
345.951	0.230184	0.193979	1.18665	0.235367	0.999924	Gadd45a
254.502	0.242875	0.204776	1.18605	0.235602	0.999924	Srp54c
259.852	0.279069	0.235353	1.18574	0.235723	0.999924	Lmln
162.502	0.304634	0.256941	1.18562	0.235773	0.999924	Fiz1
1680.27	-0.156027	0.131634	-1.18531	0.235894	0.999924	Prdx5
1661.75	0.151742	0.128063	1.1849	0.236055	0.999924	Snx13
280.591	0.232033	0.195923	1.1843	0.236293	0.999924	Fam126a
495.721	0.187058	0.158002	1.1839	0.236452	0.999924	Tprkb
20.5074	0.855054	0.722242	1.18389	0.236457	0.999924	Fank1
689.955	-0.187281	0.158241	-1.18352	0.236603	0.999924	Ythdc1
323.664	0.215979	0.182517	1.18333	0.236677	0.999924	Sall2
1794.51	-0.12351	0.104437	-1.18263	0.236955	0.999924	Sdhd
112.627	0.368672	0.311949	1.18184	0.237271	0.999924	Tpk1
169.945	-0.296848	0.251212	-1.18167	0.237338	0.999924	Mttp
69.9576	-0.42355	0.358475	-1.18153	0.237392	0.999924	Oma1
173.874	0.275541	0.233218	1.18148	0.237413	0.999924	Rps6ka1
45.6199	0.664828	0.563033	1.1808	0.237683	0.999924	A930005N03Rik
182.266	0.270326	0.229018	1.18037	0.237854	0.999924	Nsun3
123.321	-0.327612	0.277726	-1.17962	0.238151	0.999924	Aph1c
51.2497	-0.526609	0.44693	-1.17828	0.238685	0.999924	Zfp991
33.8495	0.618284	0.525095	1.17747	0.239007	0.999924	Adamts20
225.247	-0.247366	0.210101	-1.17737	0.239048	0.999924	Lmtk3
1216.64	-0.134939	0.114633	-1.17714	0.239141	0.999924	Kcnh2
569.274	-0.178397	0.151565	-1.17703	0.239183	0.999924	Mrpl9
219.674	-0.27502	0.233708	-1.17677	0.239288	0.999924	Inip
202.095	0.264734	0.224971	1.17675	0.239296	0.999924	Mex3d
26.3398	-0.717694	0.609928	-1.17669	0.239321	0.999924	Kif20a
26.7263	0.692838	0.589316	1.17567	0.239729	0.999924	Pthlh
1116.98	-0.159771	0.135927	-1.17541	0.239829	0.999924	Lancl2
1731.19	-0.120269	0.10234	-1.17519	0.239919	0.999924	Psmd7
168.703	0.338891	0.288382	1.17515	0.239936	0.999924	Dbh
71.7114	-0.4354	0.370531	-1.17507	0.239966	0.999924	Snhg1
289.555	0.23403	0.1993	1.17426	0.24029	0.999924	Prpf4
763.99	0.160578	0.136778	1.17401	0.240391	0.999924	Slc4a4
16.6637	-0.889566	0.757753	-1.17395	0.240414	0.999924	Phpt1
755.169	0.164591	0.140204	1.17394	0.24042	0.999924	Foxk1
110.563	-0.344972	0.293903	-1.17376	0.240491	0.999924	Ndufaf6
198.695	-0.304572	0.259569	-1.17338	0.240644	0.999924	Ghdc
360.276	0.199248	0.16981	1.17336	0.240653	0.999924	Jade1
33.1945	0.651024	0.555467	1.17203	0.241186	0.999924	Esam
1613.5	-0.121427	0.103618	-1.17186	0.241252	0.999924	Pdia6
810.291	0.146502	0.125035	1.17169	0.241321	0.999924	Irs2
20.8213	-0.914895	0.781082	-1.17132	0.241471	0.999924	Gpr68
114.689	-0.338869	0.289427	-1.17083	0.241669	0.999924	E430024I08Rik
218.054	-0.271006	0.231476	-1.17077	0.24169	0.999924	Pan2
262.878	0.259094	0.221333	1.17061	0.241756	0.999924	Limch1
27.2756	0.678071	0.579264	1.17057	0.24177	0.999924	Catsperz
92.7945	-0.439503	0.37562	-1.17007	0.241971	0.999924	Zfp628
39.7259	0.564015	0.482046	1.17004	0.241984	0.999924	Gm48512
49.3351	-0.553828	0.47337	-1.16997	0.242013	0.999924	Calb2
5111.57	0.124245	0.106227	1.16962	0.242154	0.999924	Stat3
1340.63	0.167512	0.143272	1.16919	0.242328	0.999924	Lnpk
312.909	0.237534	0.203202	1.16895	0.242422	0.999924	Rarg
9270.92	0.108502	0.0928225	1.16892	0.242436	0.999924	Mbnl2
300.753	0.24759	0.211902	1.16841	0.242639	0.999924	Pknox1
50.7633	-0.503011	0.430579	-1.16822	0.242719	0.999924	Atp23
1075.79	0.144742	0.124123	1.16612	0.243565	0.999924	1500004A13Rik
219.072	0.257885	0.221155	1.16609	0.24358	0.999924	Grik3
60.1418	-0.452185	0.387908	-1.1657	0.243735	0.999924	Pus7l
161.422	-0.308241	0.264548	-1.16516	0.243955	0.999924	Dcaf17
850.7	-0.179694	0.154309	-1.16451	0.244217	0.999924	Clk1
18.7046	-0.841241	0.722419	-1.16448	0.24423	0.999924	Gm12059
117.335	0.36967	0.317463	1.16445	0.244241	0.999924	Mt2
370.886	0.197354	0.169497	1.16435	0.244284	0.999924	Cntn4
155.987	0.312457	0.268377	1.16425	0.244324	0.999924	Wwtr1
670.67	-0.172361	0.148052	-1.16419	0.244346	0.999924	Ddhd1
33.0191	0.666334	0.572401	1.16411	0.244381	0.999924	Gm16793
460.7	0.217842	0.187153	1.16398	0.244433	0.999924	Soga1
48.124	1.54228	1.32503	1.16396	0.244442	0.999924	Cxcl12
275.255	-0.226431	0.19457	-1.16375	0.244525	0.999924	Ptpmt1
284.4	-0.221906	0.190715	-1.16354	0.244609	0.999924	Erlin1
20.2593	-0.797683	0.685762	-1.16321	0.244746	0.999924	Gm40466
3316.39	-0.102425	0.0880956	-1.16266	0.244968	0.999924	Prkag2
25.3611	0.849192	0.730439	1.16258	0.245001	0.999924	Mmrn2
318.053	-0.225715	0.194201	-1.16227	0.245125	0.999924	1500009L16Rik
883.265	-0.140345	0.120779	-1.162	0.245237	0.999924	Morn4
64.0123	0.464665	0.399892	1.16198	0.245245	0.999924	Mastl
36.0208	0.598644	0.515296	1.16175	0.245338	0.999924	Klf12
257.362	-0.260071	0.223901	-1.16155	0.24542	0.999924	Lsm1
80.6125	0.39308	0.33849	1.16128	0.24553	0.999924	Tacc3
398.414	0.221606	0.190838	1.16123	0.245549	0.999924	Pkn2
757.513	0.152743	0.13154	1.16119	0.245564	0.999924	Acsbg1
242.964	0.24127	0.20782	1.16096	0.24566	0.999924	Snx8
204.615	-0.25878	0.222904	-1.16095	0.245663	0.999924	Ss18l2
45.5154	-0.525604	0.453193	-1.15978	0.246138	0.999924	Ccdc65
17.7478	0.872974	0.752894	1.15949	0.246256	0.999924	Glis3
104.268	-0.384482	0.331648	-1.15931	0.246332	0.999924	Gtf2h3
24.9438	-0.681191	0.587603	-1.15927	0.246346	0.999924	Dusp4
116.893	0.328166	0.28309	1.15923	0.246363	0.999924	Rbmxl1
125.97	0.357769	0.308776	1.15867	0.246591	0.999924	Tpm2
629.01	-0.163829	0.141473	-1.15802	0.246854	0.999924	Rap2c
850.001	-0.167488	0.144688	-1.15758	0.247037	0.999924	Ilf2
449.424	-0.19111	0.165096	-1.15756	0.247042	0.999924	Atox1
106.179	-0.367294	0.317375	-1.15729	0.247154	0.999924	Nt5dc2
30.3422	0.742674	0.641752	1.15726	0.247166	0.999924	Mzf1
297.198	-0.236676	0.204529	-1.15718	0.2472	0.999924	Slc25a40
472.231	-0.181727	0.157066	-1.15701	0.247267	0.999924	Fah
121.247	0.34923	0.301901	1.15677	0.247367	0.999924	Pcdha11.1
5092.04	-0.110769	0.0957644	-1.15668	0.247404	0.999924	Trpv1
1951.41	0.111252	0.0962057	1.1564	0.247517	0.999924	Ubqln2
175.354	0.284586	0.246234	1.15575	0.247781	0.999924	Notch2
439.05	-0.277555	0.240187	-1.15558	0.247853	0.999924	Rgs10
1614.86	0.116225	0.100604	1.15528	0.247977	0.999924	Mtmr3
241.926	-0.275074	0.238186	-1.15487	0.248144	0.999924	Zfp37
283.906	0.245964	0.213015	1.15468	0.248221	0.999924	H2-T23
250.966	0.283005	0.245101	1.15465	0.248234	0.999924	Pag1
2350.71	-0.109115	0.0945083	-1.15455	0.248273	0.999924	Armcx2
1247.55	0.132928	0.11518	1.15409	0.248465	0.999924	Zfhx2
983.831	0.140353	0.12164	1.15384	0.248566	0.999924	Tceal8
409.942	-0.2015	0.174636	-1.15383	0.24857	0.999924	Armc6
740.901	0.175804	0.152466	1.15307	0.24888	0.999924	Rictor
325.707	0.220558	0.191438	1.15211	0.249276	0.999924	Med17
327.101	0.218044	0.189353	1.15152	0.249517	0.999924	Zfp874b
1299.42	-0.142075	0.123389	-1.15144	0.249552	0.999924	Sybu
453.075	0.212272	0.184381	1.15127	0.249622	0.999924	Ppp2r3a
744.705	-0.168693	0.146592	-1.15076	0.249831	0.999924	Tspan5
848.887	-0.141935	0.123351	-1.15065	0.249875	0.999924	1600014C10Rik
1108.38	0.134301	0.116724	1.15058	0.249904	0.999924	Cox7a2l
864.736	0.155317	0.135046	1.15011	0.250098	0.999924	Insr
6906.21	0.114285	0.0993756	1.15004	0.250129	0.999924	Dgkz
1111.01	-0.144959	0.126053	-1.14998	0.250152	0.999924	Ssu72
1130.11	-0.141706	0.12323	-1.14992	0.250175	0.999924	Pcbd1
346.631	0.248358	0.216026	1.14967	0.250281	0.999924	Ctnnal1
8004.04	0.0943745	0.0820928	1.14961	0.250306	0.999924	Gsk3b
1841.98	-0.129357	0.112535	-1.14948	0.250359	0.999924	Rbbp4
954.732	0.151093	0.131457	1.14938	0.250401	0.999924	Ppp1r12c
814.98	-0.158396	0.137821	-1.14929	0.250437	0.999924	Ndufa5
96.8452	-0.550235	0.478886	-1.14899	0.250561	0.999924	Zmat4
74.6562	0.415079	0.361303	1.14884	0.250622	0.999924	Slco5a1
750.955	-0.148117	0.128955	-1.14859	0.250724	0.999924	Cbr1
28.1496	0.842759	0.733956	1.14824	0.250869	0.999924	Smoc2
3137.9	-0.116067	0.101097	-1.14808	0.250937	0.999924	Idh3a
25.714	0.865594	0.754078	1.14788	0.251016	0.999924	Eng
329.008	0.20724	0.18064	1.14726	0.251276	0.999924	Parp14
2385.93	-0.108362	0.0944617	-1.14716	0.251317	0.999924	Amph
455.089	-0.177655	0.154869	-1.14713	0.251329	0.999924	Usp39
112.077	-0.343112	0.299159	-1.14692	0.251413	0.999924	Kmt5c
128.466	0.348106	0.303519	1.1469	0.251423	0.999924	Col11a2
102.794	0.347728	0.303199	1.14686	0.251438	0.999924	Ube2s
249.721	-0.247194	0.21562	-1.14643	0.251617	0.999924	Tmem134
121.149	-0.338099	0.294988	-1.14615	0.251734	0.999924	Bckdhb
23.5074	0.769363	0.671264	1.14614	0.251737	0.999924	Cenpu
384.575	-0.209845	0.183194	-1.14548	0.252012	0.999924	Lrrc75a
1921.9	0.139977	0.122252	1.14499	0.252211	0.999924	Fbxo2
2511.57	0.105284	0.0919528	1.14498	0.252218	0.999924	Dock3
101.397	0.380286	0.332143	1.14495	0.252231	0.999924	Gm9954
21.6227	-0.748599	0.653945	-1.14474	0.252316	0.999924	Pam16
160.414	0.297514	0.259951	1.1445	0.252415	0.999924	Sgcd
343.249	-0.290913	0.25419	-1.14447	0.252428	0.999924	Smim12
117.442	0.338898	0.296185	1.14421	0.252536	0.999924	Plin3
469.072	0.227347	0.198696	1.14419	0.252543	0.999924	Dnmt3a
505.807	-0.220895	0.193129	-1.14377	0.252719	0.999924	Sema3e
88.2421	-0.383721	0.335618	-1.14333	0.252903	0.999924	Ttf1
8002.08	-0.0965407	0.084449	-1.14318	0.252962	0.999924	Pam
759.929	-0.166349	0.145568	-1.14276	0.253138	0.999924	Gskip
1684.81	0.117714	0.103038	1.14243	0.253274	0.999924	Timeless
31.4823	-0.61273	0.536348	-1.14241	0.253283	0.999924	Gm15853
509.758	0.175756	0.153859	1.14232	0.253323	0.999924	Mxi1
246.653	0.231521	0.202713	1.14212	0.253406	0.999924	Rufy1
68.267	-0.41161	0.360579	-1.14153	0.253651	0.999924	Nfxl1
4103.49	0.113932	0.0998705	1.1408	0.253953	0.999924	Nav1
11625.1	-0.0987105	0.086549	-1.14052	0.254072	0.999924	Vamp2
744.641	0.153039	0.134252	1.13994	0.254313	0.999924	Als2
208.537	-0.254148	0.222971	-1.13983	0.254358	0.999924	Igfbp3
1686.76	0.146158	0.128237	1.13975	0.254391	0.999924	Aff3
391.003	0.220299	0.193292	1.13972	0.254401	0.999924	Ltv1
345.342	-0.204364	0.179313	-1.1397	0.25441	0.999924	Fbrsl1
422.381	-0.187466	0.164531	-1.1394	0.254536	0.999924	Spsb4
91.5223	0.389316	0.341744	1.1392	0.254618	0.999924	Gm15663
43.1358	0.627744	0.551339	1.13858	0.254878	0.999924	Cd93
329.251	0.238015	0.209088	1.13835	0.254975	0.999924	Antxr1
449.629	-0.175999	0.154621	-1.13827	0.25501	0.999924	Ppp1r8
21.7534	0.766554	0.673471	1.13822	0.255031	0.999924	Serinc4
112.116	-0.363823	0.319855	-1.13746	0.255345	0.999924	D11Wsu47e
21.5768	0.760325	0.668499	1.13736	0.255387	0.999924	E130008D07Rik
326.494	-0.206802	0.181842	-1.13726	0.25543	0.999924	Mlx
1322.64	0.134934	0.118671	1.13705	0.255519	0.999924	Manea
434.759	0.203826	0.179337	1.13656	0.255724	0.999924	Kank4
286.473	-1.32681	1.1674	-1.13655	0.255725	0.999924	Trpm8
1153.63	-0.131062	0.115321	-1.1365	0.255749	0.999924	Armc8
327.615	0.213515	0.187885	1.13641	0.255783	0.999924	Asb6
1078.11	0.136242	0.119914	1.13616	0.255889	0.999924	H3f3b
231.617	0.267694	0.235664	1.13591	0.255992	0.999924	Kirrel3os
52.9301	0.529914	0.466542	1.13583	0.256026	0.999924	Prc1
34.7041	-0.605158	0.532857	-1.13569	0.256088	0.999924	1700037C18Rik
995.031	0.145132	0.127804	1.13558	0.256132	0.999924	Sec16a
2319.26	0.137502	0.121126	1.1352	0.25629	0.999924	Fzd3
522.757	-0.16906	0.148971	-1.13485	0.25644	0.999924	Wdr75
16.8706	0.916705	0.807912	1.13466	0.256518	0.999924	Arhgef16
24.8041	0.697946	0.615325	1.13427	0.25668	0.999924	Tmprss5
486.926	-0.17406	0.15358	-1.13335	0.257068	0.999924	Bloc1s5
4708.97	-0.0999158	0.0881679	-1.13324	0.257112	0.999924	Rit2
5688.03	-0.098445	0.086882	-1.13309	0.257177	0.999924	Snx7
1342.43	-0.144469	0.127502	-1.13307	0.257185	0.999924	Brk1
259.68	0.243423	0.214886	1.1328	0.257297	0.999924	Gprin1
150.347	0.309917	0.27363	1.13261	0.257377	0.999924	Uap1l1
419.688	-0.183437	0.161959	-1.13261	0.257378	0.999924	Wnk3
116.362	0.439584	0.388259	1.13219	0.257554	0.999924	Col12a1
122.529	0.310485	0.274247	1.13214	0.257576	0.999924	Amz1
210.01	-0.243645	0.215232	-1.13201	0.25763	0.999924	Fcf1
874.617	0.146279	0.129241	1.13183	0.257705	0.999924	Map3k10
39.1545	0.583116	0.515279	1.13165	0.257781	0.999924	Egln3
161.863	0.419336	0.370633	1.1314	0.257885	0.999924	Gxylt1
81.2214	0.388609	0.343502	1.13131	0.257923	0.999924	Hist3h2ba
143.727	0.293593	0.259533	1.13123	0.257957	0.999924	Tradd
842.199	0.151614	0.134093	1.13066	0.258199	0.999924	Wasf1
1333.94	-0.124767	0.110373	-1.13041	0.258304	0.999924	Psma1
258.894	-0.230398	0.203829	-1.13035	0.258329	0.999924	Lmod1
18.1112	0.806785	0.713837	1.13021	0.258388	0.999924	Shcbp1
11600.4	-0.0852548	0.0754352	-1.13017	0.258403	0.999924	Rtn1
516.377	0.172002	0.152199	1.13011	0.258429	0.999924	Tars
320.717	0.229386	0.202979	1.1301	0.258434	0.999924	Mrtfa
38.9447	-0.564707	0.499744	-1.12999	0.258479	0.999924	Fam151b
916.302	0.1366	0.120923	1.12964	0.258626	0.999924	Abcc1
177.077	-0.270918	0.239848	-1.12954	0.25867	0.999924	Mtrr
948.897	0.14672	0.129901	1.12947	0.258699	0.999924	Efna5
166.557	0.319333	0.282731	1.12946	0.258703	0.999924	Ccnd3
12626.6	-0.0937252	0.0829913	-1.12934	0.258755	0.999924	Fth1
40.8151	0.570457	0.505334	1.12887	0.258952	0.999924	Galns
72.9469	-0.433682	0.384236	-1.12869	0.25903	0.999924	Rfx1
191.078	-0.263316	0.233315	-1.12858	0.259074	0.999924	Gm10516
66.4689	-0.439535	0.389471	-1.12854	0.25909	0.999924	Tmem39a
1639.55	0.130432	0.115602	1.12829	0.259199	0.999924	Exoc6b
787.675	0.155698	0.138026	1.12804	0.259304	0.999924	Flna
169.965	0.274131	0.243027	1.12799	0.259325	0.999924	Cep131
413.133	-0.21462	0.190273	-1.12796	0.259337	0.999924	Sh3yl1
35.8254	0.662912	0.587719	1.12794	0.259345	0.999924	Ppp1r3b
574.729	0.169837	0.150597	1.12776	0.259421	0.999924	Prxl2a
103.221	0.348181	0.308747	1.12772	0.259436	0.999924	Exosc8
158.262	0.283113	0.251092	1.12752	0.259521	0.999924	Lyrm1
86.8242	0.398216	0.353177	1.12752	0.259521	0.999924	Entpd1
381.634	-0.202881	0.179991	-1.12717	0.259669	0.999924	Suox
32.0024	-0.63138	0.560248	-1.12696	0.259757	0.999924	Htr4
201.614	-0.253372	0.22484	-1.1269	0.259784	0.999924	Dot1l
3461.76	0.102507	0.0909703	1.12682	0.25982	0.999924	Cpne3
8132.3	-0.113351	0.100623	-1.1265	0.259955	0.999924	Lrpprc
241.479	-0.269908	0.239643	-1.12629	0.260041	0.999924	Lsm11
26878.6	0.0922854	0.0820184	1.12518	0.260513	0.999924	Sptan1
4252.68	0.127701	0.113516	1.12495	0.260609	0.999924	Tln1
31.2784	-0.713226	0.63407	-1.12484	0.260658	0.999924	Gm10602
59.6065	-0.441171	0.392275	-1.12465	0.260738	0.999924	Pnlip
291.963	0.227264	0.202096	1.12453	0.260788	0.999924	Utp14a
1483.44	-0.117216	0.104243	-1.12445	0.260823	0.999924	Ppp2cb
16.3307	0.826137	0.734706	1.12445	0.260824	0.999924	Atcayos
1315.82	-0.121002	0.10762	-1.12435	0.260866	0.999924	Mtmr2
25.2208	0.782453	0.696257	1.1238	0.261098	0.999924	H2-T10
1862.8	-0.118362	0.105374	-1.12325	0.26133	0.999924	Dhrs1
436.328	-0.22562	0.200882	-1.12315	0.261374	0.999924	Atf6b
442.925	0.189269	0.168525	1.12309	0.2614	0.999924	Pex14
112.357	0.329787	0.293676	1.12296	0.261454	0.999924	Zfp30
284.757	0.220886	0.196725	1.12282	0.261516	0.999924	Tctn1
831.659	-0.146459	0.130481	-1.12245	0.261671	0.999924	Rnf181
97.0423	0.412746	0.367727	1.12243	0.261681	0.999924	Pelo
301.346	0.236707	0.210895	1.1224	0.261694	0.999924	Osgep
128.883	-0.300446	0.267725	-1.12222	0.261769	0.999924	Ncapd2
1728.74	-0.122927	0.109547	-1.12214	0.261803	0.999924	Tardbp
493.716	-0.171916	0.153257	-1.12175	0.261968	0.999924	Gprin2
44.7614	0.524878	0.468081	1.12134	0.262143	0.999924	Adra1a
278.83	-0.283494	0.25283	-1.12128	0.262169	0.999924	Nhp2
62.0482	0.455048	0.40584	1.12125	0.262181	0.999924	Slc1a1
26.8398	-0.682067	0.608388	-1.1211	0.262243	0.999924	Mrpl48-ps
4622.51	0.0956756	0.085353	1.12094	0.262314	0.999924	Cand1
671.671	0.157791	0.140795	1.12071	0.26241	0.999924	Gphn
426.222	0.182697	0.163066	1.12038	0.26255	0.999924	Arid2
69.1677	-0.470834	0.420426	-1.1199	0.262757	0.999924	Misp
53.5407	-0.458798	0.409696	-1.11985	0.262777	0.999924	D16Ertd472e
167.405	-0.311476	0.278302	-1.1192	0.263054	0.999924	Ebf4
159.902	0.286423	0.255949	1.11906	0.263114	0.999924	Col18a1
257.924	0.248868	0.222402	1.119	0.263139	0.999924	Hs3st2
967.158	-0.140815	0.125873	-1.11871	0.263264	0.999924	Stx4a
166.402	0.294909	0.263787	1.11798	0.263575	0.999924	Pxn
1182.14	-0.137528	0.123017	-1.11796	0.263583	0.999924	Clstn3
1440.11	-0.117649	0.105275	-1.11753	0.263766	0.999924	Carmil3
417.833	0.185067	0.165649	1.11722	0.2639	0.999924	Greb1
640.111	0.151123	0.135271	1.11719	0.263914	0.999924	Akt2
760	-0.150483	0.134709	-1.1171	0.263952	0.999924	Mien1
91.7043	-0.382634	0.342544	-1.11704	0.263979	0.999924	Frg2f1
297.466	0.231449	0.207255	1.11674	0.264107	0.999924	Amigo3
1175.35	0.143744	0.12875	1.11646	0.264226	0.999924	Bcl2l13
39.1573	-0.614439	0.550517	-1.11611	0.264374	0.999924	Rhpn2
492.938	-0.166406	0.149117	-1.11594	0.264447	0.999924	Synj2
2783.14	0.111908	0.100284	1.11591	0.264459	0.999924	Ankrd52
3199.97	0.115162	0.103211	1.11579	0.264513	0.999924	Ccdc92
162.841	-0.267865	0.240078	-1.11574	0.264534	0.999924	Oard1
47.3852	-0.530073	0.475139	-1.11562	0.264586	0.999924	Spin2c
859.844	0.136793	0.122632	1.11548	0.264647	0.999924	Colq
1033.99	0.134777	0.120863	1.11513	0.264796	0.999924	Rab11fip2
36.8614	0.572692	0.513578	1.1151	0.264807	0.999924	5830417I10Rik
85.4812	0.3738	0.335216	1.1151	0.264807	0.999924	Adgb
85.0302	0.424451	0.38072	1.11486	0.264909	0.999924	Tc2n
2952.14	-0.110777	0.0993894	-1.11458	0.265031	0.999924	Etl4
46.6816	0.498809	0.447599	1.11441	0.265103	0.999924	Vrk2
31.7481	-0.604679	0.542869	-1.11386	0.26534	0.999924	Gramd3
223.009	-0.280856	0.252217	-1.11355	0.265473	0.999924	Frs3
568.451	-0.173703	0.156019	-1.11335	0.26556	0.999924	Rgs8
181.158	-0.298455	0.268157	-1.11298	0.265715	0.999924	Cars2
272.559	0.239523	0.215267	1.11268	0.265846	0.999924	Ybx3
375.807	-0.18979	0.170615	-1.11239	0.265972	0.999924	Tent4a
2220.29	0.150869	0.135651	1.11218	0.266061	0.999924	Abca8b
2473.28	0.123706	0.111229	1.11217	0.266064	0.999924	Nfat5
3439.56	-0.101178	0.090976	-1.11214	0.266076	0.999924	Pgrmc1
3443.46	0.124457	0.111922	1.112	0.26614	0.999924	Cnr1
230.505	-0.251054	0.225785	-1.11192	0.266174	0.999924	Cebpzos
345.374	0.235289	0.211624	1.11183	0.266212	0.999924	Lama2
707.407	-0.173023	0.155725	-1.11108	0.266532	0.999924	Ddr1
41.4461	-0.622753	0.560594	-1.11088	0.26662	0.999924	Atg9b
241.585	0.242792	0.218646	1.11043	0.266813	0.999924	Rims1
298.792	-0.208923	0.188201	-1.11011	0.266952	0.999924	Klhl15
19.4125	0.824638	0.742981	1.1099	0.26704	0.999924	Cdca7
441.298	-0.2344	0.211312	-1.10926	0.267317	0.999924	Rps3a1
259.97	-0.222524	0.20064	-1.10907	0.267401	0.999924	Ocel1
38.6838	-0.563163	0.507892	-1.10882	0.267506	0.999924	Zfp217
32.0334	0.64262	0.579611	1.10871	0.267556	0.999924	Gm4951
32.3712	0.632927	0.570908	1.10863	0.267589	0.999924	Nlrp5-ps
853.06	0.157176	0.141813	1.10833	0.267721	0.999924	Ankhd1
2793.49	-0.0990276	0.0894056	-1.10762	0.268025	0.999924	Saraf
1186.24	-0.163761	0.147937	-1.10696	0.268311	0.999924	Pmm1
256.663	0.225908	0.204096	1.10687	0.268349	0.999924	Cdh10
171.903	-0.292512	0.264288	-1.10679	0.268383	0.999924	Popdc3
144.101	-0.305554	0.276175	-1.10638	0.268563	0.999924	Nmi
535.606	0.173171	0.156542	1.10623	0.268628	0.999924	Furin
477.254	-0.191734	0.173398	-1.10574	0.268838	0.999924	Pdhx
1709.9	-0.115123	0.104136	-1.1055	0.268942	0.999924	Esr1
91.4175	0.354505	0.320722	1.10534	0.269014	0.999924	Cd34
64.2305	0.435332	0.394023	1.10484	0.269229	0.999924	Creb5
2691.29	-0.109319	0.099027	-1.10393	0.269624	0.999924	6330403K07Rik
29.1956	-0.714489	0.647353	-1.10371	0.26972	0.999924	Hist2h3c2
1743.98	0.11039	0.10002	1.10368	0.269732	0.999924	Oasl2
896.248	-0.137207	0.124347	-1.10342	0.269846	0.999924	Ablim2
275.565	-0.242352	0.219689	-1.10316	0.26996	0.999924	Metap1d
94.1706	-0.371455	0.336796	-1.10291	0.270067	0.999924	Ccdc106
382.492	-0.187765	0.17025	-1.10287	0.270083	0.999924	Rpl21
222.389	-0.234413	0.212563	-1.10279	0.270117	0.999924	Ganc
594.797	-0.155818	0.141295	-1.10278	0.270121	0.999924	Pdrg1
815.033	-0.141877	0.128691	-1.10247	0.270259	0.999924	BC005624
186.069	0.268403	0.243527	1.10215	0.270398	0.999924	Ddx60
206.408	0.245989	0.2232	1.1021	0.270417	0.999924	Ldlrad4
251.846	-0.24657	0.223785	-1.10181	0.270543	0.999924	Agk
223.897	0.29605	0.268736	1.10164	0.270619	0.999924	Etaa1
75.2813	0.385873	0.35034	1.10142	0.270712	0.999924	Pigl
348.56	-0.214259	0.194609	-1.10097	0.270909	0.999924	Mrps10
85.5658	0.418968	0.38058	1.10087	0.270955	0.999924	1700086L19Rik
3808.16	-0.0962253	0.0874773	-1.1	0.271331	0.999924	Atp5g3
5364.12	0.099194	0.090183	1.09992	0.271368	0.999924	Hspa12a
553.875	-0.178948	0.162706	-1.09982	0.271411	0.999924	Ica1l
36.8132	0.547661	0.498099	1.0995	0.271549	0.999924	Ubald2
3785.14	0.106203	0.096603	1.09938	0.271603	0.999924	Camsap2
10068.2	-0.106188	0.0966061	-1.09919	0.271686	0.999924	Maged1
402.312	-0.17776	0.161756	-1.09894	0.271795	0.999924	Pop4
636.54	-0.166905	0.151932	-1.09855	0.271965	0.999924	Rab28
45.711	-0.528914	0.481505	-1.09846	0.272003	0.999924	Gm37811
54.3524	0.50497	0.459973	1.09783	0.272281	0.999924	Grhpr
337.989	-0.21288	0.193934	-1.09769	0.272339	0.999924	Sphkap
223.031	0.242478	0.220946	1.09745	0.272444	0.999924	Csrnp1
187.411	0.257292	0.234467	1.09735	0.27249	0.999924	Dtymk
1982.05	-0.105556	0.0962148	-1.09708	0.272604	0.999924	Cul2
117.262	0.35213	0.321036	1.09685	0.272705	0.999924	Dock1
143.553	0.333639	0.304228	1.09667	0.272785	0.999924	Clca2
419.729	-0.184057	0.167848	-1.09657	0.27283	0.999924	Pop5
90.2267	-0.400692	0.365454	-1.09642	0.272894	0.999924	Myl12a
16.39	-0.925881	0.84483	-1.09594	0.273106	0.999924	Uckl1os
434.275	-0.180262	0.164527	-1.09564	0.273237	0.999924	Sntb2
18.1999	-0.755465	0.689581	-1.09554	0.273279	0.999924	Vmn1r86
1727.04	-0.113486	0.103602	-1.0954	0.273343	0.999924	Vps26b
276.412	0.214813	0.19631	1.09425	0.273845	0.999924	Ttll11
813.739	0.144519	0.132082	1.09416	0.273886	0.999924	Eif2ak3
762.909	0.173825	0.158919	1.0938	0.274045	0.999924	Ebf3
619.034	-0.193644	0.177122	-1.09328	0.274271	0.999924	Dixdc1
83.477	-0.361345	0.330663	-1.09279	0.274486	0.999924	Gstk1
29.0351	0.622705	0.569937	1.09259	0.274575	0.999924	Ism2
133.253	0.318099	0.29115	1.09256	0.274586	0.999924	Psd4
10499.5	-0.103229	0.0945599	-1.09168	0.274974	0.999924	Anxa5
390.292	0.20928	0.19173	1.09153	0.275039	0.999924	Gid4
940.685	0.138765	0.127147	1.09138	0.275108	0.999924	Cgnl1
20.4639	-0.852184	0.780837	-1.09137	0.275109	0.999924	Gm36371
30.0197	-0.612032	0.561024	-1.09092	0.275308	0.999924	2900076A07Rik
258.193	-0.238598	0.218742	-1.09077	0.275373	0.999924	Ring1
1374.53	0.119146	0.109245	1.09063	0.275434	0.999924	Atp6v0c
80.8094	0.467839	0.428969	1.09061	0.275443	0.999924	Gm38901
120.446	0.374393	0.343291	1.0906	0.27545	0.999924	Ly6e
720.552	-0.141088	0.129391	-1.0904	0.275538	0.999924	Trmt2b
170.582	-0.281025	0.257734	-1.09037	0.275551	0.999924	Rbm12
582.802	-0.173733	0.159344	-1.0903	0.275579	0.999924	Cgref1
271.407	-0.211127	0.193664	-1.09017	0.275638	0.999924	Sde2
150.176	0.298975	0.274285	1.09002	0.275706	0.999924	Bmp2k
1389.73	0.157842	0.144839	1.08978	0.275811	0.999924	Cep350
195.788	0.28022	0.257159	1.08968	0.275854	0.999924	Kcnh1
643.854	-0.155351	0.142595	-1.08946	0.275953	0.999924	Svil
918.084	-0.131968	0.12125	-1.0884	0.276418	0.999924	Jkamp
1729.49	-0.109661	0.100757	-1.08837	0.276433	0.999924	Atxn2
1112.03	0.122543	0.112617	1.08814	0.276533	0.999924	Ermp1
1285.47	0.158171	0.1454	1.08783	0.27667	0.999924	Gm765
1201.16	0.135803	0.124855	1.08769	0.276733	0.999924	Kmt2c
1281.88	-0.116227	0.106868	-1.08758	0.276782	0.999924	Dnajc27
376.977	-0.228672	0.21028	-1.08747	0.27683	0.999924	Osmr
121.245	-0.325252	0.29912	-1.08736	0.276876	0.999924	Ptpn5
267.632	0.213	0.195915	1.0872	0.276947	0.999924	Lmo4
1217.29	0.119011	0.109521	1.08665	0.277191	0.999924	Rnf44
1348.23	0.11656	0.107267	1.08664	0.277195	0.999924	Arid1b
1213.33	0.12465	0.114752	1.08626	0.277364	0.999924	Srsf7
589.296	-0.206706	0.19036	-1.08587	0.277537	0.999924	Fam20c
812.7	0.150263	0.138391	1.08579	0.277572	0.999924	Cul9
31.5015	0.663684	0.611324	1.08565	0.277634	0.999924	Wdr72
487.312	-0.165807	0.152736	-1.08558	0.277665	0.999924	Wdr19
407.501	-0.195956	0.180578	-1.08516	0.277849	0.999924	Mmgt2
3948.65	0.114032	0.105145	1.08452	0.278134	0.999924	Usp32
215.808	-0.276194	0.254769	-1.0841	0.278323	0.999924	Zfp746
101.654	-0.343818	0.317302	-1.08357	0.278556	0.999924	Zfp688
316.918	-0.241666	0.223045	-1.08349	0.278593	0.999924	Supv3l1
1292.76	-0.137017	0.12647	-1.08339	0.278636	0.999924	Gipc1
394.487	-0.191739	0.177009	-1.08322	0.278712	0.999924	Rpl39
275.699	0.22106	0.204087	1.08316	0.278736	0.999924	St5
485.364	-0.180774	0.166904	-1.0831	0.278764	0.999924	Pygo2
300.85	0.205118	0.189422	1.08286	0.27887	0.999924	Pcnt
221.363	-0.23826	0.220088	-1.08256	0.279002	0.999924	Dhrs7b
447.178	0.185662	0.171527	1.08241	0.27907	0.999924	Hps5
1474.4	0.111739	0.103251	1.08221	0.279159	0.999924	Hsd17b7
2394.3	-0.113298	0.104723	-1.08189	0.279303	0.999924	Tmsb10
416.168	-0.173854	0.160711	-1.08178	0.279348	0.999924	Mrpl18
24.8229	0.679453	0.628181	1.08162	0.279421	0.999924	Tchh
69.2187	-0.390292	0.360858	-1.08157	0.279445	0.999924	Atp8b3
200.622	-0.240891	0.222785	-1.08127	0.279576	0.999924	Polr1c
882.335	-0.151171	0.13981	-1.08126	0.279582	0.999924	Dnaja4
731.328	-0.177973	0.164679	-1.08073	0.279819	0.999924	Parg
3322.59	-0.0937625	0.0867742	-1.08054	0.279904	0.999924	Dnaja2
114.415	0.322234	0.298311	1.08019	0.280055	0.999924	Itgb4
46.8142	0.47693	0.441579	1.08006	0.280117	0.999924	Lmnb1
169.142	0.256749	0.23773	1.08	0.28014	0.999924	Coq6
3056.65	-0.107219	0.0992979	-1.07977	0.280245	0.999924	Fxyd6
39.6837	0.541679	0.501704	1.07968	0.280285	0.999924	Gipc2
100.476	0.341301	0.316307	1.07902	0.280579	0.999924	Cxcr4
346.007	-0.199772	0.18521	-1.07862	0.280756	0.999924	Nt5m
27.1796	0.678633	0.629276	1.07843	0.28084	0.999924	Gm37233
91.5448	0.39538	0.366651	1.07836	0.280875	0.999924	Ticam1
172.871	-0.25847	0.239693	-1.07834	0.280883	0.999924	Cmc2
280.5	0.226461	0.210011	1.07833	0.280888	0.999924	Creg1
1327.69	-0.113946	0.105716	-1.07785	0.281101	0.999924	Atp5h
37.3396	0.588759	0.546298	1.07773	0.281156	0.999924	Gramd1c
193.582	-0.241558	0.22428	-1.07704	0.281464	0.999924	Yars2
26.3246	0.640741	0.594924	1.07701	0.281474	0.999924	Fut4
106.836	-0.330975	0.307438	-1.07656	0.281677	0.999924	3110040N11Rik
5362.24	0.0876197	0.0813938	1.07649	0.281707	0.999924	Ppp1r1c
571.599	0.191323	0.177755	1.07633	0.28178	0.999924	Rhobtb2
496.85	-0.173948	0.161707	-1.0757	0.282062	0.999924	Max
602.572	0.150562	0.139986	1.07555	0.28213	0.999924	Sptbn4
284.224	-0.205357	0.190991	-1.07522	0.282277	0.999924	Ebpl
233.77	0.226742	0.210882	1.07521	0.282282	0.999924	Cdkl3
1186.33	-0.123092	0.114485	-1.07518	0.282295	0.999924	Smg5
140.023	-0.280152	0.260572	-1.07515	0.28231	0.999924	Cklf
1078.38	-0.12692	0.11805	-1.07514	0.282311	0.999924	Ube2q1
29.0601	0.593341	0.551934	1.07502	0.282365	0.999924	Adnp
739.539	-0.146171	0.136021	-1.07463	0.282542	0.999924	Rprd1a
6362.14	-0.100865	0.0938725	-1.07449	0.282602	0.999924	Nsf
25.191	0.709508	0.660696	1.07388	0.282877	0.999924	Trim30a
315.98	-0.241554	0.224939	-1.07387	0.282883	0.999924	Hsd17b10
306.124	-0.218587	0.203581	-1.07371	0.282954	0.999924	Ier3
2245.15	-0.109907	0.102405	-1.07326	0.283156	0.999924	Atp6v1g2
24.9562	0.638961	0.595616	1.07277	0.283373	0.999924	Gm42853
638.598	0.171834	0.160186	1.07272	0.283399	0.999924	Slc4a1ap
772.584	0.153389	0.142994	1.0727	0.283408	0.999924	Stk4
24058.5	-0.0813779	0.0758879	-1.07234	0.283566	0.999924	Vat1l
1070.97	-0.148769	0.138773	-1.07203	0.283706	0.999924	Ptges3
446.834	0.185624	0.173241	1.07148	0.283954	0.999924	Slc27a1
502.611	0.194392	0.181444	1.07136	0.284009	0.999924	Syn3
29.1697	-0.613935	0.573096	-1.07126	0.284052	0.999924	Rspo3
29.2709	-0.658708	0.614902	-1.07124	0.284061	0.999924	Rpl23a
894.48	-0.134163	0.125263	-1.07105	0.284147	0.999924	Wipf2
1950.8	0.107988	0.100838	1.07091	0.284212	0.999924	Gtf3c1
21.8291	0.748872	0.699311	1.07087	0.284227	0.999924	Gm38077
36.6402	0.652034	0.608975	1.07071	0.284301	0.999924	Spata1
43.5958	0.553668	0.517121	1.07067	0.284317	0.999924	Meis1
386.731	0.194397	0.18157	1.07064	0.284329	0.999924	Rgs2
290.241	0.198787	0.185689	1.07054	0.284378	0.999924	Gcdh
98.3079	0.333131	0.311226	1.07038	0.284447	0.999924	Arfip1
69.8076	0.509487	0.47599	1.07038	0.284451	0.999924	Nts
50.5705	-0.499002	0.466691	-1.06923	0.284965	0.999924	Hacd1
21.2582	0.71495	0.668848	1.06893	0.285103	0.999924	Abhd1
842.382	-0.154388	0.14444	-1.06887	0.285127	0.999924	Tbcel
46.482	0.514537	0.481433	1.06876	0.285177	0.999924	Tmem203
788.4	0.143136	0.13393	1.06874	0.285189	0.999924	Zfp148
81.2052	0.414156	0.387626	1.06844	0.28532	0.999924	Dcx
992.519	-0.133748	0.125182	-1.06843	0.285327	0.999924	Ndufb5
859.337	0.159536	0.149327	1.06837	0.285355	0.999924	Cntnap1
48.6487	0.518383	0.485421	1.0679	0.285564	0.999924	Polg2
2851.89	0.114043	0.106838	1.06744	0.285773	0.999924	Dnajc13
179.438	-0.276345	0.259083	-1.06663	0.28614	0.999924	Akr1b10
85.3269	-0.35617	0.333989	-1.06641	0.286237	0.999924	Bace2
156.354	0.280187	0.262743	1.06639	0.286246	0.999924	Cpxm1
33.8873	0.561206	0.526665	1.06558	0.286612	0.999924	Pcdh15
218.515	-0.249747	0.234482	-1.0651	0.286829	0.999924	Gps1
71.9549	-0.411016	0.385895	-1.0651	0.286832	0.999924	Spaca6
51.9731	-0.447643	0.420341	-1.06495	0.286897	0.999924	Vangl1
1111.42	-0.121992	0.114553	-1.06494	0.286903	0.999924	Pdia4
19.2823	-0.730336	0.68608	-1.06451	0.2871	0.999924	Igf2bp2
105.588	-0.314481	0.295707	-1.06349	0.287561	0.999924	Adck5
1915.34	-0.115104	0.108251	-1.06331	0.287643	0.999924	Dhx15
523.315	0.16951	0.159435	1.06319	0.287695	0.999924	Zbtb41
118.888	-0.312564	0.293997	-1.06315	0.287713	0.999924	Pdxp
58.7552	0.431159	0.405612	1.06298	0.28779	0.999924	Unc5a
549.705	-0.155749	0.146526	-1.06295	0.287807	0.999924	Arfgap2
[truncated: 53,336 more rows]

## Sheet: gProfiler_mmusculus_OF vs OVA
source	term_name	term_id	highlighted	adjusted_p_value	negative_log10_of_adjusted_p_value	term_size	query_size	intersection_size	effective_domain_size	intersections
GO:MF	protein binding	GO:0005515	TRUE	0.00324062	2.48937	10460	44	33	25063	NRN1,KCNV1,HSPA1A,OPRM1,KMT2D,PCP4L1,PRKCB,S100A16,NEFH,HIPK2,HECTD1,CCDC88C,GAN,GABRB2,DNAJB1,SORL1,H2-Q7,DOCK10,GABRA1,UBC,TRIM25,THY1,DUSP6,PIEZO2,BSN,RGS17,ETL4,P2RY1,CNTN1,S100B,IGHM,DPYSL2,ZBTB20
GO:MF	binding	GO:0005488	FALSE	0.040389	1.39374	16378	44	40	25063	ST18,NRN1,KCNV1,HSPA1A,OPRM1,KMT2D,AI987944,PCP4L1,PRKCB,S100A16,NEFH,HIPK2,HECTD1,CCDC88C,GAN,GABRB2,DNAJB1,BBX,SORL1,H2-Q7,DOCK10,PIK3R5,GABRA1,UBC,TRIM25,THY1,DUSP6,PIEZO2,BSN,MYL1,GPR119,RGS17,ETL4,P2RY1,CNTN1,S100B,IGHM,MT-CYTB,DPYSL2,ZBTB20
GO:BP	negative regulation of inclusion body assembly	GO:0090084	TRUE	0.00174743	2.7576	12	46	3	26944	HSPA1A,DNAJB1,SORL1
GO:BP	monoatomic ion transport	GO:0006811	TRUE	0.00969032	2.01366	1239	46	11	26944	KCNV1,OPRM1,PRKCB,SLC9A7,GABRB2,GABRA1,THY1,PIEZO2,P2RY1,CNTN1,MT-CYTB
GO:BP	regulation of inclusion body assembly	GO:0090083	FALSE	0.0104508	1.98085	21	46	3	26944	HSPA1A,DNAJB1,SORL1
GO:BP	chemical synaptic transmission	GO:0007268	TRUE	0.0253335	1.5963	877	46	9	26944	NRN1,OPRM1,SYNPR,PRKCB,NEFH,GABRB2,GABRA1,P2RY1,S100B
GO:BP	anterograde trans-synaptic signaling	GO:0098916	FALSE	0.0253335	1.5963	877	46	9	26944	NRN1,OPRM1,SYNPR,PRKCB,NEFH,GABRB2,GABRA1,P2RY1,S100B
GO:BP	inclusion body assembly	GO:0070841	FALSE	0.0255273	1.593	28	46	3	26944	HSPA1A,DNAJB1,SORL1
GO:BP	trans-synaptic signaling	GO:0099537	FALSE	0.0267416	1.57281	883	46	9	26944	NRN1,OPRM1,SYNPR,PRKCB,NEFH,GABRB2,GABRA1,P2RY1,S100B
GO:BP	multicellular organism development	GO:0007275	TRUE	0.0274214	1.56191	4879	46	21	26944	NRN1,HSPA1A,OPRM1,KMT2D,PRKCB,NEFH,HIPK2,GABRB2,BBX,SORL1,H2-Q7,DOCK10,GABRA1,THY1,DUSP6,BSN,ETL4,P2RY1,CNTN1,S100B,DPYSL2
GO:BP	system development	GO:0048731	FALSE	0.0329776	1.48178	4117	46	19	26944	NRN1,OPRM1,PRKCB,NEFH,HIPK2,GABRB2,BBX,SORL1,H2-Q7,DOCK10,GABRA1,THY1,DUSP6,BSN,ETL4,P2RY1,CNTN1,S100B,DPYSL2
GO:BP	synaptic signaling	GO:0099536	FALSE	0.0379537	1.42075	923	46	9	26944	NRN1,OPRM1,SYNPR,PRKCB,NEFH,GABRB2,GABRA1,P2RY1,S100B
GO:BP	cell-cell signaling	GO:0007267	FALSE	0.0418409	1.3784	1734	46	12	26944	NRN1,OPRM1,SYNPR,PRKCB,NEFH,CCDC88C,GABRB2,GABRA1,THY1,GPR119,P2RY1,S100B
GO:CC	synapse	GO:0045202	TRUE	7.76758e-06	5.10971	1641	45	15	26995	NRN1,OPRM1,SYNPR,PRKCB,RPS25,NEFH,GABRB2,DNAJB1,DOCK10,GABRA1,BSN,RGS17,P2RY1,CNTN1,DPYSL2
GO:CC	neuron projection	GO:0043005	TRUE	2.41093e-05	4.61781	1525	45	14	26995	OPRM1,SYNPR,PRKCB,NEFH,GABRB2,DNAJB1,DOCK10,GABRA1,THY1,BSN,RGS17,P2RY1,CNTN1,DPYSL2
GO:CC	cell junction	GO:0030054	FALSE	8.10983e-05	4.09099	2260	45	16	26995	NRN1,OPRM1,SYNPR,PRKCB,RPS25,NEFH,CCDC88C,GABRB2,DNAJB1,DOCK10,GABRA1,BSN,RGS17,P2RY1,CNTN1,DPYSL2
GO:CC	postsynapse	GO:0098794	FALSE	0.000246041	3.60899	847	45	10	26995	OPRM1,RPS25,NEFH,GABRB2,DNAJB1,DOCK10,GABRA1,BSN,P2RY1,CNTN1
GO:CC	somatodendritic compartment	GO:0036477	FALSE	0.000339463	3.46921	1103	45	11	26995	OPRM1,NEFH,DNAJB1,SORL1,DOCK10,GABRA1,THY1,BSN,P2RY1,S100B,DPYSL2
GO:CC	presynapse	GO:0098793	FALSE	0.000818502	3.08698	751	45	9	26995	NRN1,OPRM1,SYNPR,PRKCB,GABRB2,BSN,P2RY1,CNTN1,DPYSL2
GO:CC	dendrite	GO:0030425	FALSE	0.0011482	2.93998	783	45	9	26995	OPRM1,NEFH,DNAJB1,DOCK10,GABRA1,THY1,BSN,P2RY1,DPYSL2
GO:CC	dendritic tree	GO:0097447	FALSE	0.00117214	2.93102	785	45	9	26995	OPRM1,NEFH,DNAJB1,DOCK10,GABRA1,THY1,BSN,P2RY1,DPYSL2
GO:CC	plasma membrane bounded cell projection	GO:0120025	FALSE	0.00138652	2.85807	2460	45	15	26995	OPRM1,SYNPR,PRKCB,NEFH,GABRB2,DNAJB1,DOCK10,GABRA1,THY1,BSN,RGS17,P2RY1,CNTN1,S100B,DPYSL2
GO:CC	postsynaptic specialization	GO:0099572	FALSE	0.00151718	2.81896	427	45	7	26995	RPS25,NEFH,GABRB2,DNAJB1,GABRA1,BSN,P2RY1
GO:CC	cell body	GO:0044297	FALSE	0.00181918	2.74012	829	45	9	26995	OPRM1,NEFH,DNAJB1,SORL1,THY1,BSN,P2RY1,S100B,DPYSL2
GO:CC	cell projection	GO:0042995	FALSE	0.00229903	2.63846	2564	45	15	26995	OPRM1,SYNPR,PRKCB,NEFH,GABRB2,DNAJB1,DOCK10,GABRA1,THY1,BSN,RGS17,P2RY1,CNTN1,S100B,DPYSL2
GO:CC	myelin sheath	GO:0043209	TRUE	0.00509205	2.29311	202	45	5	26995	NEFH,UBC,THY1,CNTN1,DPYSL2
GO:CC	neuronal cell body	GO:0043025	FALSE	0.00661111	2.17973	743	45	8	26995	OPRM1,NEFH,DNAJB1,SORL1,THY1,BSN,S100B,DPYSL2
GO:CC	GABA-ergic synapse	GO:0098982	FALSE	0.0125994	1.89965	123	45	4	26995	OPRM1,GABRB2,GABRA1,BSN
GO:CC	neuron to neuron synapse	GO:0098984	FALSE	0.019763	1.70415	437	45	6	26995	SYNPR,RPS25,NEFH,DNAJB1,BSN,P2RY1
GO:CC	dendrite membrane	GO:0032590	FALSE	0.0215107	1.66735	52	45	3	26995	OPRM1,GABRA1,THY1
GO:CC	cytoplasm	GO:0005737	TRUE	0.0274227	1.56189	11561	45	32	26995	HSPA1A,OPRM1,SYNPR,PRKCB,RPS25,S100A16,NEFH,HIPK2,MS4A4B,CCDC88C,GAN,SLC9A7,GABRB2,DNAJB1,SORL1,H2-Q7,DOCK10,PIK3R5,GABRA1,UBC,TRIM25,THY1,DUSP6,BSN,MYL1,GPR119,RGS17,ETL4,S100B,MT-CYTB,DPYSL2,ZBTB20
GO:CC	synaptic membrane	GO:0097060	FALSE	0.0361032	1.44245	488	45	6	26995	OPRM1,GABRB2,GABRA1,BSN,P2RY1,CNTN1
KEGG	Morphine addiction	KEGG:05032	FALSE	0.00671723	2.17281	90	26	4	9330	OPRM1,PRKCB,GABRB2,GABRA1
CORUM	Metallothionein-3 complex	CORUM:676	FALSE	0.00274938	2.56076	6	5	2	1082	HSPA1A,DPYSL2
HP	Abnormal muscle physiology	HP:0011804	FALSE	0.0280739	1.5517	2501	15	15	5098	KMT2D,NEFH,CCDC88C,GAN,SLC9A7,GABRB2,SORL1,PIK3R5,GABRA1,DUSP6,PIEZO2,MYL1,CNTN1,MT-CYTB,ZBTB20
HP	Abnormality of movement	HP:0100022	FALSE	0.0313541	1.50371	2042	15	14	5098	NEFH,CCDC88C,GAN,SLC9A7,GABRB2,SORL1,PIK3R5,GABRA1,DUSP6,PIEZO2,MYL1,CNTN1,MT-CYTB,ZBTB20

## Sheet: gProfiler_mmusculus_OF vs naive
source	term_name	term_id	highlighted	adjusted_p_value	negative_log10_of_adjusted_p_value	term_size	query_size	intersection_size	effective_domain_size	intersections
GO:MF	protein binding	GO:0005515	TRUE	0.00324062	2.48937	10460	44	33	25063	HSPA1A,SYNE1,DST,ANK2,NR4A1,SDC4,SACS,MYCBP2,HERC1,PCLO,DNAJB1,KMT2D,IDE,FAM107A,MACF1,OPRM1,LRP1B,BSN,HINT1,MAP1B,PSD3,APC,LIFR,KMT2A,HMBOX1,PER1,ZBTB20,UNC80,USP9X,CACNA1C,COX4I1,DMXL2,KCTD16
GO:MF	cytoskeletal protein binding	GO:0008092	FALSE	0.0219068	1.65942	1005	44	9	25063	SYNE1,DST,ANK2,FAM107A,MACF1,OPRM1,MAP1B,APC,CACNA1C
GO:MF	histone H3K4 monomethyltransferase activity	GO:0140945	TRUE	0.0266534	1.57425	7	44	2	25063	KMT2D,KMT2A
GO:MF	structural constituent of presynaptic active zone	GO:0098882	TRUE	0.0266534	1.57425	7	44	2	25063	PCLO,BSN
GO:BP	regulation of cell communication	GO:0010646	TRUE	0.0006569	3.1825	3616	45	20	26944	HSPA1A,SYNE1,ANK2,PCLO,CHRNB3,KMT2D,ARFGEF3,FAM107A,OPRM1,HINT1,MAP1B,PSD3,APC,GUCY1A2,KMT2A,PER1,USP9X,CACNA1C,NFAT5,KCTD16
GO:BP	cellular component organization or biogenesis	GO:0071840	TRUE	0.00154114	2.81216	7815	45	29	26944	HSPA1A,SYNE1,DST,ANK2,NR4A1,SDC4,SACS,MYCBP2,HERC1,PCLO,DNAJB1,KMT2D,COL24A1,FAM107A,MACF1,BSN,MAP1B,UTP14B,MDN1,APC,LIFR,KMT2A,HMBOX1,PER1,PIEZO1,USP9X,NFAT5,KCTD16,VPS13C
GO:BP	negative regulation of inclusion body assembly	GO:0090084	TRUE	0.00169223	2.77154	12	45	3	26944	HSPA1A,SACS,DNAJB1
GO:BP	cell junction assembly	GO:0034329	TRUE	0.00179337	2.74633	471	45	8	26944	DST,ANK2,SDC4,MYCBP2,PCLO,FAM107A,BSN,MAP1B
GO:BP	chemical synaptic transmission	GO:0007268	TRUE	0.00256863	2.5903	877	45	10	26944	SYNE1,NR4A1,PCLO,CHRNB3,FAM107A,OPRM1,MAP1B,KMT2A,CACNA1C,DMXL2
GO:BP	anterograde trans-synaptic signaling	GO:0098916	FALSE	0.00256863	2.5903	877	45	10	26944	SYNE1,NR4A1,PCLO,CHRNB3,FAM107A,OPRM1,MAP1B,KMT2A,CACNA1C,DMXL2
GO:BP	trans-synaptic signaling	GO:0099537	FALSE	0.002731	2.56368	883	45	10	26944	SYNE1,NR4A1,PCLO,CHRNB3,FAM107A,OPRM1,MAP1B,KMT2A,CACNA1C,DMXL2
GO:BP	regulation of signaling	GO:0023051	TRUE	0.00333985	2.47627	3616	45	19	26944	HSPA1A,SYNE1,PCLO,CHRNB3,KMT2D,ARFGEF3,FAM107A,OPRM1,HINT1,MAP1B,PSD3,APC,GUCY1A2,KMT2A,PER1,USP9X,CACNA1C,NFAT5,KCTD16
GO:BP	cellular component organization	GO:0016043	FALSE	0.00374957	2.42602	7612	45	28	26944	HSPA1A,SYNE1,DST,ANK2,NR4A1,SDC4,SACS,MYCBP2,HERC1,PCLO,DNAJB1,KMT2D,COL24A1,FAM107A,MACF1,BSN,MAP1B,MDN1,APC,LIFR,KMT2A,HMBOX1,PER1,PIEZO1,USP9X,NFAT5,KCTD16,VPS13C
GO:BP	synaptic signaling	GO:0099536	FALSE	0.00406193	2.39127	923	45	10	26944	SYNE1,NR4A1,PCLO,CHRNB3,FAM107A,OPRM1,MAP1B,KMT2A,CACNA1C,DMXL2
GO:BP	regulation of cellular component biogenesis	GO:0044087	FALSE	0.00903861	2.0439	1010	45	10	26944	HSPA1A,SYNE1,SDC4,SACS,MYCBP2,DNAJB1,FAM107A,MAP1B,APC,PIEZO1
GO:BP	regulation of inclusion body assembly	GO:0090083	FALSE	0.0101232	1.99468	21	45	3	26944	HSPA1A,SACS,DNAJB1
GO:BP	regulation of postsynaptic membrane potential	GO:0060078	TRUE	0.0136698	1.86424	163	45	5	26944	SYNE1,PCLO,CHRNB3,OPRM1,CACNA1C
GO:BP	presynapse to nucleus signaling pathway	GO:0099526	TRUE	0.0145958	1.83577	3	45	2	26944	PCLO,BSN
GO:BP	presynaptic signal transduction	GO:0098928	FALSE	0.0145958	1.83577	3	45	2	26944	PCLO,BSN
GO:BP	inclusion body assembly	GO:0070841	FALSE	0.0247319	1.60674	28	45	3	26944	HSPA1A,SACS,DNAJB1
GO:BP	regulation of membrane potential	GO:0042391	FALSE	0.0259502	1.58586	484	45	7	26944	SYNE1,ANK2,PCLO,CHRNB3,OPRM1,KMT2A,CACNA1C
GO:BP	presynaptic active zone assembly	GO:1904071	TRUE	0.0291606	1.5352	4	45	2	26944	PCLO,BSN
GO:BP	establishment of localization in cell	GO:0051649	TRUE	0.0300687	1.52189	2018	45	13	26944	HSPA1A,SYNE1,DST,NR4A1,SDC4,PCLO,BSN,MAP1B,MDN1,APC,USP9X,CACNA1C,VPS13C
GO:BP	cell-cell signaling	GO:0007267	FALSE	0.0340119	1.46837	1734	45	12	26944	SYNE1,ANK2,NR4A1,PCLO,CHRNB3,FAM107A,OPRM1,MAP1B,APC,KMT2A,CACNA1C,DMXL2
GO:BP	establishment of localization	GO:0051234	FALSE	0.0410132	1.38708	4696	45	20	26944	HSPA1A,SYNE1,DST,ANK2,NR4A1,SDC4,PCLO,CHRNB3,OPRM1,LRP1B,BSN,MAP1B,MDN1,APC,PER1,UNC80,PIEZO1,USP9X,CACNA1C,VPS13C
GO:BP	regulation of biological quality	GO:0065008	FALSE	0.0451027	1.3458	3134	45	16	26944	HSPA1A,SYNE1,ANK2,MYCBP2,PCLO,CHRNB3,IDE,FAM107A,SCPEP1,OPRM1,MAP1B,KMT2A,USP9X,CACNA1C,NFAT5,DMXL2
GO:CC	postsynapse	GO:0098794	TRUE	2.80536e-06	5.55201	847	46	12	26995	SYNE1,DST,ANK2,PCLO,DNAJB1,CHRNB3,OPRM1,BSN,MAP1B,PSD3,CACNA1C,KCTD16
GO:CC	synapse	GO:0045202	FALSE	1.04321e-05	4.98163	1641	46	15	26995	SYNE1,DST,ANK2,NR4A1,PCLO,DNAJB1,CHRNB3,FAM107A,OPRM1,BSN,MAP1B,PSD3,CACNA1C,DMXL2,KCTD16
GO:CC	cell junction	GO:0030054	FALSE	1.73504e-05	4.76069	2260	46	17	26995	SYNE1,DST,ANK2,NR4A1,SDC4,PCLO,DNAJB1,CHRNB3,FAM107A,OPRM1,BSN,MAP1B,PSD3,APC,CACNA1C,DMXL2,KCTD16
GO:CC	postsynaptic density	GO:0014069	FALSE	5.24346e-05	4.28038	379	46	8	26995	DST,ANK2,PCLO,DNAJB1,BSN,MAP1B,PSD3,CACNA1C
GO:CC	asymmetric synapse	GO:0032279	FALSE	7.89213e-05	4.10281	400	46	8	26995	DST,ANK2,PCLO,DNAJB1,BSN,MAP1B,PSD3,CACNA1C
GO:CC	cell projection	GO:0042995	TRUE	0.000106963	3.97077	2564	46	17	26995	SYNE1,DST,MYCBP2,PCLO,DNAJB1,CHRNB3,FAM107A,MACF1,OPRM1,BSN,MAP1B,PSD3,APC,UNC80,USP9X,CACNA1C,KCTD16
GO:CC	postsynaptic specialization	GO:0099572	FALSE	0.00012921	3.8887	427	46	8	26995	DST,ANK2,PCLO,DNAJB1,BSN,MAP1B,PSD3,CACNA1C
GO:CC	neuron to neuron synapse	GO:0098984	FALSE	0.000153783	3.81309	437	46	8	26995	DST,ANK2,PCLO,DNAJB1,BSN,MAP1B,PSD3,CACNA1C
GO:CC	neuron projection	GO:0043005	FALSE	0.00022827	3.64155	1525	46	13	26995	SYNE1,DST,MYCBP2,PCLO,DNAJB1,CHRNB3,FAM107A,OPRM1,BSN,MAP1B,UNC80,USP9X,CACNA1C
GO:CC	plasma membrane region	GO:0098590	FALSE	0.00065765	3.18201	1408	46	12	26995	HSPA1A,SYNE1,ANK2,CHRNB3,IDE,FAM107A,OPRM1,BSN,PSD3,APC,CACNA1C,KCTD16
GO:CC	axon	GO:0030424	FALSE	0.0016017	2.79542	801	46	9	26995	DST,MYCBP2,PCLO,OPRM1,BSN,MAP1B,UNC80,USP9X,CACNA1C
GO:CC	plasma membrane bounded cell projection	GO:0120025	FALSE	0.0018072	2.74299	2460	46	15	26995	SYNE1,DST,MYCBP2,PCLO,DNAJB1,CHRNB3,FAM107A,OPRM1,BSN,MAP1B,PSD3,APC,UNC80,USP9X,CACNA1C
GO:CC	synaptic membrane	GO:0097060	FALSE	0.00401368	2.39646	488	46	7	26995	SYNE1,ANK2,CHRNB3,OPRM1,BSN,CACNA1C,KCTD16
GO:CC	cytosol	GO:0005829	TRUE	0.0040721	2.39018	4105	46	19	26995	HSPA1A,DST,NR4A1,PRUNE2,MYCBP2,DNAJB1,IDE,BSN,HINT1,MAP1B,MDN1,GUCY1A2,KMT2A,HMBOX1,PER1,USP9X,COX4I1,NFAT5,VPS13C
GO:CC	cytoplasm	GO:0005737	FALSE	0.00426963	2.36961	11561	46	34	26995	HSPA1A,SYNE1,DST,ANK2,NR4A1,SDC4,PRUNE2,SACS,MYCBP2,PCLO,DNAJB1,ARFGEF3,IDE,FAM107A,MACF1,OPRM1,LAPTM4A,BSN,HINT1,MAP1B,MDN1,APC,GUCY1A2,KMT2A,HMBOX1,PER1,ZBTB20,PIEZO1,USP9X,CACNA1C,COX4I1,NFAT5,DMXL2,VPS13C
GO:CC	postsynaptic membrane	GO:0045211	FALSE	0.00467348	2.33036	332	46	6	26995	SYNE1,ANK2,CHRNB3,OPRM1,CACNA1C,KCTD16
GO:CC	presynapse	GO:0098793	FALSE	0.00808131	2.09252	751	46	8	26995	NR4A1,PCLO,CHRNB3,OPRM1,BSN,CACNA1C,DMXL2,KCTD16
GO:CC	dendrite	GO:0030425	FALSE	0.0108519	1.9645	783	46	8	26995	SYNE1,PCLO,DNAJB1,OPRM1,BSN,MAP1B,UNC80,CACNA1C
GO:CC	dendritic tree	GO:0097447	FALSE	0.0110486	1.95669	785	46	8	26995	SYNE1,PCLO,DNAJB1,OPRM1,BSN,MAP1B,UNC80,CACNA1C
GO:CC	myofibril	GO:0030016	TRUE	0.0128811	1.89005	242	46	5	26995	SYNE1,DST,ANK2,SDC4,CACNA1C
GO:CC	cytoskeleton of presynaptic active zone	GO:0048788	FALSE	0.0135458	1.8682	7	46	2	26995	PCLO,BSN
GO:CC	contractile fiber	GO:0043292	FALSE	0.0155994	1.80689	252	46	5	26995	SYNE1,DST,ANK2,SDC4,CACNA1C
GO:CC	cytoskeleton	GO:0005856	FALSE	0.0263543	1.57915	2373	46	13	26995	HSPA1A,SYNE1,DST,ANK2,MYCBP2,PCLO,FAM107A,MACF1,BSN,MAP1B,MDN1,APC,HMBOX1
GO:CC	presynaptic cytoskeleton	GO:0099569	FALSE	0.0353232	1.45194	11	46	2	26995	PCLO,BSN
KEGG	Cushing syndrome	KEGG:04934	FALSE	0.00359771	2.44397	162	25	5	9330	NR4A1,KMT2D,APC,KMT2A,CACNA1C
TF	Factor: RNF96; motif: BCCCGCRGCC; match class: 1	TF:M01199_1	FALSE	0.0326779	1.48575	2726	47	17	21629	THSD7A,MYCBP2,PCLO,IDE,HINT1,UTP14B,MDN1,APC,LIFR,GUCY1A2,KMT2A,UNC80,CACNA1C,COX4I1,HECTD4,NFAT5,DMXL2
HP	Abnormal pinna morphology	HP:0000377	FALSE	0.00404463	2.39312	1268	22	16	5098	SYNE1,DST,HERC1,PCLO,KMT2D,MACF1,MAP1B,APC,LIFR,KMT2A,ZBTB20,UNC80,PIEZO1,USP9X,CACNA1C,HECTD4
HP	Abnormality of the outer ear	HP:0000356	FALSE	0.00483641	2.31548	1284	22	16	5098	SYNE1,DST,HERC1,PCLO,KMT2D,MACF1,MAP1B,APC,LIFR,KMT2A,ZBTB20,UNC80,PIEZO1,USP9X,CACNA1C,HECTD4
HP	Abnormal calvaria morphology	HP:0002683	FALSE	0.00681824	2.16633	970	22	14	5098	SYNE1,HERC1,PCLO,KMT2D,APC,LIFR,KMT2A,ZBTB20,UNC80,USP9X,CACNA1C,COX4I1,HECTD4,DMXL2
HP	Abnormality of movement	HP:0100022	FALSE	0.0130892	1.88309	2042	22	19	5098	SYNE1,DST,SACS,HERC1,PCLO,MACF1,HINT1,MAP1B,APC,LIFR,KMT2A,ZBTB20,UNC80,USP9X,CACNA1C,COX4I1,HECTD4,DMXL2,VPS13C
HP	Abnormality of the lower limb	HP:0002814	FALSE	0.0140637	1.8519	1807	22	18	5098	SYNE1,DST,SACS,HERC1,KMT2D,MACF1,HINT1,MAP1B,APC,LIFR,KMT2A,ZBTB20,UNC80,PIEZO1,USP9X,CACNA1C,COX4I1,DMXL2
HP	Abnormal hand morphology	HP:0005922	FALSE	0.0144479	1.8402	1031	22	14	5098	SYNE1,DST,HERC1,KMT2D,HINT1,MAP1B,APC,LIFR,KMT2A,ZBTB20,UNC80,USP9X,COX4I1,DMXL2
HP	Abnormal finger morphology	HP:0001167	FALSE	0.0147996	1.82975	1204	22	15	5098	SYNE1,SACS,HERC1,KMT2D,HINT1,MAP1B,APC,LIFR,KMT2A,ZBTB20,UNC80,USP9X,COX4I1,HECTD4,DMXL2
HP	Scoliosis	HP:0002650	FALSE	0.0229854	1.63855	1071	22	14	5098	SYNE1,SACS,HERC1,KMT2D,HINT1,MAP1B,APC,LIFR,KMT2A,ZBTB20,UNC80,PIEZO1,USP9X,HECTD4
HP	Blotching pigmentation of the skin	HP:0007610	FALSE	0.0233945	1.63089	2	22	2	5098	DST,LIFR
HP	Absent corneal reflex	HP:0034252	FALSE	0.0233945	1.63089	2	22	2	5098	DST,LIFR
HP	Abnormal foot morphology	HP:0001760	FALSE	0.0380009	1.42021	1487	22	16	5098	SYNE1,DST,SACS,HERC1,KMT2D,HINT1,MAP1B,APC,LIFR,KMT2A,ZBTB20,UNC80,USP9X,CACNA1C,COX4I1,DMXL2
HP	Abnormal digit morphology	HP:0011297	FALSE	0.0474011	1.32421	1511	22	16	5098	SYNE1,SACS,HERC1,KMT2D,HINT1,MAP1B,APC,LIFR,KMT2A,ZBTB20,UNC80,USP9X,CACNA1C,COX4I1,HECTD4,DMXL2

## Sheet: gProfiler_mmusculus_OVA vs naiv
source	term_name	term_id	highlighted	adjusted_p_value	negative_log10_of_adjusted_p_value	term_size	query_size	intersection_size	effective_domain_size	intersections
GO:MF	GABA-gated chloride ion channel activity	GO:0022851	TRUE	3.11526e-06	5.50651	13	47	4	25063	GABRA1,GABRB2,GABRG1,GABRA2
GO:MF	inhibitory extracellular ligand-gated monoatomic ion channel activity	GO:0005237	FALSE	1.03129e-05	4.98662	17	47	4	25063	GABRA1,GABRB2,GABRG1,GABRA2
GO:MF	GABA-A receptor activity	GO:0004890	TRUE	1.67492e-05	4.77601	19	47	4	25063	GABRA1,GABRB2,GABRG1,GABRA2
GO:MF	gated channel activity	GO:0022836	FALSE	2.80212e-05	4.55251	294	47	8	25063	GABRA1,GABRB2,GABRG1,PIEZO1,GABRA2,KCNA2,CHRNA3,KCNA1
GO:MF	transmitter-gated channel activity	GO:0022835	FALSE	2.94724e-05	4.53058	57	47	5	25063	GABRA1,GABRB2,GABRG1,GABRA2,CHRNA3
GO:MF	transmitter-gated monoatomic ion channel activity	GO:0022824	FALSE	2.94724e-05	4.53058	57	47	5	25063	GABRA1,GABRB2,GABRG1,GABRA2,CHRNA3
GO:MF	GABA receptor activity	GO:0016917	FALSE	3.14801e-05	4.50196	22	47	4	25063	GABRA1,GABRB2,GABRG1,GABRA2
GO:MF	ligand-gated monoatomic anion channel activity	GO:0099095	FALSE	3.80551e-05	4.41959	23	47	4	25063	GABRA1,GABRB2,GABRG1,GABRA2
GO:MF	monoatomic ion channel activity	GO:0005216	FALSE	3.90943e-05	4.40789	433	47	9	25063	GABRA1,GABRB2,GABRG1,PIEZO1,GABRA2,KCNA2,CHRNA3,KCNA1,SLC4A11
GO:MF	extracellular ligand-gated monoatomic ion channel activity	GO:0005230	FALSE	9.64418e-05	4.01573	72	47	5	25063	GABRA1,GABRB2,GABRG1,GABRA2,CHRNA3
GO:MF	channel activity	GO:0015267	FALSE	0.000127237	3.89539	498	47	9	25063	GABRA1,GABRB2,GABRG1,PIEZO1,GABRA2,KCNA2,CHRNA3,KCNA1,SLC4A11
GO:MF	passive transmembrane transporter activity	GO:0022803	FALSE	0.000127237	3.89539	498	47	9	25063	GABRA1,GABRB2,GABRG1,PIEZO1,GABRA2,KCNA2,CHRNA3,KCNA1,SLC4A11
GO:MF	monoatomic ion transmembrane transporter activity	GO:0015075	FALSE	0.000239165	3.6213	705	47	10	25063	GABRA1,GABRB2,GABRG1,PIEZO1,GABRA2,KCNA2,CHRNA3,KCNA1,SLC4A11,ATP1B3
GO:MF	neurotransmitter receptor activity	GO:0030594	FALSE	0.000347874	3.45858	93	47	5	25063	GABRA1,GABRB2,GABRG1,GABRA2,CHRNA3
GO:MF	benzodiazepine receptor activity	GO:0008503	FALSE	0.000410197	3.38701	11	47	3	25063	GABRA1,GABRG1,GABRA2
GO:MF	transmitter-gated monoatomic ion channel activity involved in regulation of postsynaptic membrane potential	GO:1904315	FALSE	0.00111806	2.95153	52	47	4	25063	GABRA1,GABRB2,GABRA2,CHRNA3
GO:MF	neurotransmitter receptor activity involved in regulation of postsynaptic membrane potential	GO:0099529	FALSE	0.0013025	2.88522	54	47	4	25063	GABRA1,GABRB2,GABRA2,CHRNA3
GO:MF	ligand-gated monoatomic ion channel activity involved in regulation of presynaptic membrane potential	GO:0099507	FALSE	0.00326318	2.48636	21	47	3	25063	GABRA1,GABRB2,GABRA2
GO:MF	postsynaptic neurotransmitter receptor activity	GO:0098960	FALSE	0.00348799	2.45742	69	47	4	25063	GABRA1,GABRB2,GABRA2,CHRNA3
GO:MF	inorganic anion transmembrane transporter activity	GO:0015103	FALSE	0.00353994	2.451	149	47	5	25063	GABRA1,GABRB2,GABRG1,GABRA2,SLC4A11
GO:MF	ligand-gated monoatomic ion channel activity	GO:0015276	FALSE	0.00500078	2.30096	160	47	5	25063	GABRA1,GABRB2,GABRG1,GABRA2,CHRNA3
GO:MF	ligand-gated channel activity	GO:0022834	FALSE	0.00563516	2.24909	164	47	5	25063	GABRA1,GABRB2,GABRG1,GABRA2,CHRNA3
GO:MF	chloride channel activity	GO:0005254	FALSE	0.00876184	2.0574	87	47	4	25063	GABRA1,GABRB2,GABRG1,GABRA2
GO:MF	transmembrane transporter activity	GO:0022857	FALSE	0.0109952	1.9588	1087	47	10	25063	GABRA1,GABRB2,GABRG1,PIEZO1,GABRA2,KCNA2,CHRNA3,KCNA1,SLC4A11,ATP1B3
GO:MF	inorganic molecular entity transmembrane transporter activity	GO:0015318	FALSE	0.0110745	1.95568	657	47	8	25063	GABRA1,GABRB2,GABRG1,GABRA2,KCNA2,KCNA1,SLC4A11,ATP1B3
GO:MF	voltage-gated monoatomic ion channel activity involved in regulation of postsynaptic membrane potential	GO:1905030	TRUE	0.0139416	1.85569	5	47	2	25063	KCNA2,KCNA1
GO:MF	monoatomic anion channel activity	GO:0005253	FALSE	0.0145761	1.83636	99	47	4	25063	GABRA1,GABRB2,GABRG1,GABRA2
GO:MF	transporter activity	GO:0005215	FALSE	0.0235042	1.62886	1189	47	10	25063	GABRA1,GABRB2,GABRG1,PIEZO1,GABRA2,KCNA2,CHRNA3,KCNA1,SLC4A11,ATP1B3
GO:MF	neuropeptide receptor activity	GO:0008188	TRUE	0.0337334	1.47194	45	47	3	25063	NPY1R,GAL,NTSR1
GO:MF	chloride transmembrane transporter activity	GO:0015108	FALSE	0.0385109	1.41442	127	47	4	25063	GABRA1,GABRB2,GABRG1,GABRA2
GO:BP	regulation of postsynaptic membrane potential	GO:0060078	TRUE	6.47272e-07	6.18891	163	47	8	26944	GABRA1,GABRB2,GABRG1,GABRA2,NTSR1,KCNA2,CHRNA3,KCNA1
GO:BP	regulation of membrane potential	GO:0042391	FALSE	9.0959e-07	6.04115	484	47	11	26944	GABRA1,GABRB2,GABRG1,NTRK3,GABRA2,NTSR1,KCNA2,CHRNA3,KCNA1,SLC4A11,ATP1B3
GO:BP	regulation of presynaptic membrane potential	GO:0099505	FALSE	1.03923e-05	4.98329	38	47	5	26944	GABRA1,GABRB2,GABRA2,KCNA2,KCNA1
GO:BP	cell junction assembly	GO:0034329	TRUE	1.17226e-05	4.93098	471	47	10	26944	GABRA1,GABRB2,SDC4,NTRK3,CLDN5,CDH6,GABRA2,LRRN1,MDGA1,DST
GO:BP	monoatomic ion transport	GO:0006811	TRUE	2.40667e-05	4.61858	1239	47	14	26944	CNTN1,GABRA1,GABRB2,GABRG1,PIEZO1,EDN3,P2RY1,GABRA2,NTSR1,KCNA2,CHRNA3,KCNA1,SLC4A11,ATP1B3
GO:BP	nervous system development	GO:0007399	TRUE	2.46522e-05	4.60814	2529	47	19	26944	CNTN1,OLFM3,GABRA1,GABRB2,EDN3,GAL,SDC4,PTPRB,NTRK3,P2RY1,CLDN5,GABRA2,KCNA2,CHRNA3,LRRN1,ALCAM,MDGA1,KCNA1,DST
GO:BP	monoatomic ion transmembrane transport	GO:0034220	FALSE	0.000127472	3.89459	975	47	12	26944	GABRA1,GABRB2,GABRG1,PIEZO1,EDN3,GABRA2,NTSR1,KCNA2,CHRNA3,KCNA1,SLC4A11,ATP1B3
GO:BP	regulation of biological quality	GO:0065008	FALSE	0.000137248	3.8625	3134	47	20	26944	GABRA1,GABRB2,GABRG1,EDN3,NPY1R,GAL,DOCK4,NTRK3,P2RY1,CLDN5,GABRA2,NTSR1,KCNA2,CHRNA3,LRRN1,SCPEP1,MDGA1,KCNA1,SLC4A11,ATP1B3
GO:BP	gamma-aminobutyric acid signaling pathway	GO:0007214	TRUE	0.000358942	3.44498	30	47	4	26944	GABRA1,GABRB2,GABRG1,GABRA2
GO:BP	system development	GO:0048731	FALSE	0.000528551	3.27691	4117	47	22	26944	CNTN1,OLFM3,GABRA1,GABRB2,PAPPA2,EDN3,NPY1R,GAL,SDC4,PTPRB,NTRK3,P2RY1,CLDN5,GABRA2,KCNA2,CHRNA3,TNFRSF1A,LRRN1,ALCAM,MDGA1,KCNA1,DST
GO:BP	cell junction organization	GO:0034330	FALSE	0.00187874	2.72613	814	47	10	26944	GABRA1,GABRB2,SDC4,NTRK3,CLDN5,CDH6,GABRA2,LRRN1,MDGA1,DST
GO:BP	regulation of secretion by cell	GO:1903530	TRUE	0.00324153	2.48925	667	47	9	26944	EDN3,NPY1R,GAL,SDC4,P2RY1,NTSR1,KCNA2,CHRNA3,TNFRSF1A
GO:BP	synapse assembly	GO:0007416	FALSE	0.00345957	2.46098	217	47	6	26944	GABRA1,GABRB2,NTRK3,GABRA2,LRRN1,MDGA1
GO:BP	anatomical structure development	GO:0048856	FALSE	0.00350036	2.45589	6269	47	26	26944	CNTN1,OLFM3,GABRA1,GABRB2,PAPPA2,PIEZO1,EDN3,NPY1R,COL24A1,GAL,SDC4,PTPRB,NTRK3,P2RY1,CLDN5,CDH6,LRP1B,GABRA2,KCNA2,CHRNA3,TNFRSF1A,LRRN1,ALCAM,MDGA1,KCNA1,DST
GO:BP	inorganic ion transmembrane transport	GO:0098660	FALSE	0.00382089	2.41784	881	47	10	26944	GABRA1,GABRB2,GABRG1,EDN3,GABRA2,NTSR1,KCNA2,KCNA1,SLC4A11,ATP1B3
GO:BP	developmental process	GO:0032502	FALSE	0.00522769	2.28169	6854	47	27	26944	CNTN1,OLFM3,GABRA1,GABRB2,PAPPA2,PIEZO1,EDN3,NPY1R,COL24A1,GAL,SDC4,PTPRB,NTRK3,P2RY1,CLDN5,CDH6,LRP1B,GABRA2,KCNA2,CHRNA3,TNFRSF1A,LRRN1,ALCAM,MDGA1,KCNA1,SLC4A11,DST
GO:BP	vascular process in circulatory system	GO:0003018	TRUE	0.00575413	2.24002	237	47	6	26944	EDN3,NPY1R,DOCK4,P2RY1,CLDN5,SCPEP1
GO:BP	inorganic anion transmembrane transport	GO:0098661	FALSE	0.00782911	2.10629	141	47	5	26944	GABRA1,GABRB2,GABRG1,GABRA2,SLC4A11
GO:BP	inhibitory synapse assembly	GO:1904862	FALSE	0.00787752	2.10361	19	47	3	26944	GABRA1,GABRB2,GABRA2
GO:BP	regulation of secretion	GO:0051046	FALSE	0.00806443	2.09343	746	47	9	26944	EDN3,NPY1R,GAL,SDC4,P2RY1,NTSR1,KCNA2,CHRNA3,TNFRSF1A
GO:BP	synaptic transmission, GABAergic	GO:0051932	TRUE	0.009576	2.01882	67	47	4	26944	GABRA1,GABRB2,GABRG1,GABRA2
GO:BP	export from cell	GO:0140352	FALSE	0.00999664	2.00015	982	47	10	26944	EDN3,NPY1R,GAL,SDC4,P2RY1,NTSR1,KCNA2,CHRNA3,TNFRSF1A,ATP1B3
GO:BP	multicellular organism development	GO:0007275	FALSE	0.010091	1.99606	4879	47	22	26944	CNTN1,OLFM3,GABRA1,GABRB2,PAPPA2,EDN3,NPY1R,GAL,SDC4,PTPRB,NTRK3,P2RY1,CLDN5,GABRA2,KCNA2,CHRNA3,TNFRSF1A,LRRN1,ALCAM,MDGA1,KCNA1,DST
GO:BP	transmembrane transport	GO:0055085	FALSE	0.0141556	1.84907	1525	47	12	26944	GABRA1,GABRB2,GABRG1,PIEZO1,EDN3,GABRA2,NTSR1,KCNA2,CHRNA3,KCNA1,SLC4A11,ATP1B3
GO:BP	anatomical structure morphogenesis	GO:0009653	FALSE	0.0159108	1.79831	2761	47	16	26944	CNTN1,OLFM3,PAPPA2,EDN3,NPY1R,SDC4,PTPRB,NTRK3,P2RY1,CLDN5,CDH6,KCNA2,CHRNA3,TNFRSF1A,ALCAM,DST
GO:BP	regulation of system process	GO:0044057	TRUE	0.0166344	1.77899	614	47	8	26944	EDN3,NPY1R,GAL,DOCK4,NTSR1,CHRNA3,TNFRSF1A,KCNA1
GO:BP	muscle system process	GO:0003012	TRUE	0.0168478	1.77346	437	47	7	26944	EDN3,NPY1R,DOCK4,P2RY1,CHRNA3,TNFRSF1A,KCNA1
GO:BP	monoatomic anion transport	GO:0006820	FALSE	0.0200072	1.69881	171	47	5	26944	GABRA1,GABRB2,GABRG1,GABRA2,SLC4A11
GO:BP	establishment of localization	GO:0051234	FALSE	0.0217255	1.66303	4696	47	21	26944	CNTN1,GABRA1,GABRB2,GABRG1,PIEZO1,EDN3,NPY1R,GAL,SDC4,MAN1A,P2RY1,LRP1B,GABRA2,NTSR1,KCNA2,CHRNA3,TNFRSF1A,KCNA1,SLC4A11,DST,ATP1B3
GO:BP	blood vessel diameter maintenance	GO:0097746	FALSE	0.0256321	1.59122	180	47	5	26944	EDN3,NPY1R,DOCK4,P2RY1,SCPEP1
GO:BP	regulation of tube diameter	GO:0035296	FALSE	0.0256321	1.59122	180	47	5	26944	EDN3,NPY1R,DOCK4,P2RY1,SCPEP1
GO:BP	neurogenesis	GO:0022008	FALSE	0.0257605	1.58905	1907	47	13	26944	CNTN1,OLFM3,GABRB2,EDN3,SDC4,PTPRB,NTRK3,P2RY1,CHRNA3,ALCAM,MDGA1,KCNA1,DST
GO:BP	regulation of tube size	GO:0035150	FALSE	0.0263261	1.57961	181	47	5	26944	EDN3,NPY1R,DOCK4,P2RY1,SCPEP1
GO:BP	inorganic anion transport	GO:0015698	FALSE	0.0270346	1.56808	182	47	5	26944	GABRA1,GABRB2,GABRG1,GABRA2,SLC4A11
GO:BP	chemical synaptic transmission	GO:0007268	FALSE	0.0294202	1.53135	877	47	9	26944	GABRA1,GABRB2,GABRG1,EDN3,NPY1R,P2RY1,GABRA2,NTSR1,CHRNA3
GO:BP	anterograde trans-synaptic signaling	GO:0098916	FALSE	0.0294202	1.53135	877	47	9	26944	GABRA1,GABRB2,GABRG1,EDN3,NPY1R,P2RY1,GABRA2,NTSR1,CHRNA3
GO:BP	signaling	GO:0023052	TRUE	0.0300295	1.52245	7472	47	27	26944	CNTN1,OLFM3,GABRA1,GABRB2,PAPPA2,GABRG1,EDN3,GPR65,NPY1R,GAL,DOCK4,NTRK3,P2RY1,CLDN5,NACC2,CDH6,ADGRL4,GABRA2,NTSR1,KCNA2,CHRNA3,LYPD6,TNFRSF1A,ECEL1,TENM2,KCNA1,DOK2
GO:BP	transport	GO:0006810	FALSE	0.0308603	1.5106	4397	47	20	26944	CNTN1,GABRA1,GABRB2,GABRG1,PIEZO1,EDN3,NPY1R,GAL,SDC4,P2RY1,LRP1B,GABRA2,NTSR1,KCNA2,CHRNA3,TNFRSF1A,KCNA1,SLC4A11,DST,ATP1B3
GO:BP	trans-synaptic signaling	GO:0099537	FALSE	0.0310492	1.50795	883	47	9	26944	GABRA1,GABRB2,GABRG1,EDN3,NPY1R,P2RY1,GABRA2,NTSR1,CHRNA3
GO:BP	cell communication	GO:0007154	TRUE	0.0400959	1.3969	7582	47	27	26944	CNTN1,OLFM3,GABRA1,GABRB2,PAPPA2,GABRG1,EDN3,GPR65,NPY1R,GAL,DOCK4,NTRK3,P2RY1,CLDN5,NACC2,CDH6,ADGRL4,GABRA2,NTSR1,KCNA2,CHRNA3,LYPD6,TNFRSF1A,ECEL1,TENM2,KCNA1,DOK2
GO:BP	secretion by cell	GO:0032940	FALSE	0.0404003	1.39361	913	47	9	26944	EDN3,NPY1R,GAL,SDC4,P2RY1,NTSR1,KCNA2,CHRNA3,TNFRSF1A
GO:BP	synaptic signaling	GO:0099536	FALSE	0.0440083	1.35647	923	47	9	26944	GABRA1,GABRB2,GABRG1,EDN3,NPY1R,P2RY1,GABRA2,NTSR1,CHRNA3
GO:BP	sensory perception of pain	GO:0019233	TRUE	0.0469707	1.32817	100	47	4	26944	NPY1R,NTSR1,KCNA2,KCNA1
GO:BP	positive regulation of monoatomic ion transport	GO:0043270	FALSE	0.0478721	1.31992	205	47	5	26944	CNTN1,EDN3,P2RY1,NTSR1,ATP1B3
GO:BP	localization	GO:0051179	FALSE	0.0485412	1.31389	5364	47	22	26944	CNTN1,GABRA1,GABRB2,GABRG1,PIEZO1,EDN3,NPY1R,GAL,SDC4,MAN1A,P2RY1,NACC2,LRP1B,GABRA2,NTSR1,KCNA2,CHRNA3,TNFRSF1A,KCNA1,SLC4A11,DST,ATP1B3
GO:BP	regulation of neurotransmitter secretion	GO:0046928	FALSE	0.0488453	1.31118	101	47	4	26944	EDN3,NPY1R,P2RY1,CHRNA3
GO:CC	neuron projection	GO:0043005	TRUE	1.58969e-08	7.79869	1525	49	18	26995	CNTN1,GABRA1,GABRB2,GABRG1,NPY1R,DOCK4,NTRK3,P2RY1,CLDN5,GABRA2,NTSR1,KCNA2,CHRNA3,LYPD6,TNFRSF1A,ALCAM,KCNA1,DST
GO:CC	receptor complex	GO:0043235	TRUE	2.21713e-08	7.65421	392	49	11	26995	OLFM3,GABRA1,GABRB2,GABRG1,PTPRB,NTRK3,LRP1B,GABRA2,CHRNA3,TNFRSF1A,ALCAM
GO:CC	cell periphery	GO:0071944	FALSE	3.05804e-08	7.51456	6862	49	34	26995	CNTN1,THSD7A,OLFM3,GABRA1,GABRB2,PAPPA2,GABRG1,GPR65,NPY1R,PCDH11X,COL24A1,DOCK4,NTRK3,S100A16,P2RY1,CLDN5,CDH6,ADGRL4,GABRA2,NTSR1,KCNA2,CHRNA3,LYPD6,TNFRSF1A,ECEL1,LRRN1,ALCAM,TENM2,MDGA1,KCNA1,SLC4A11,DST,ATP1B3,SUSD2
GO:CC	postsynaptic membrane	GO:0045211	FALSE	8.80547e-08	7.05525	332	49	10	26995	CNTN1,GABRA1,GABRB2,GABRG1,NTRK3,P2RY1,GABRA2,KCNA2,CHRNA3,KCNA1
GO:CC	membrane	GO:0016020	FALSE	9.06025e-08	7.04286	10191	49	40	26995	CNTN1,THSD7A,OLFM3,GABRA1,GABRB2,1110032F04RIK,PAPPA2,GABRG1,PIEZO1,GPR65,NPY1R,PCDH11X,SDC4,PTPRB,DOCK4,NTRK3,MAN1A,S100A16,P2RY1,CLDN5,CDH6,ADGRL4,LRP1B,GABRA2,NTSR1,KCNA2,CHRNA3,LYPD6,TNFRSF1A,ECEL1,LRRN1,ALCAM,TENM2,MDGA1,KCNA1,SLC4A11,DST,ATP1B3,SUSD2,NDST3
GO:CC	plasma membrane	GO:0005886	FALSE	1.52097e-07	6.81788	6367	49	32	26995	CNTN1,THSD7A,OLFM3,GABRA1,GABRB2,PAPPA2,GABRG1,GPR65,NPY1R,PCDH11X,DOCK4,NTRK3,S100A16,P2RY1,CLDN5,CDH6,ADGRL4,GABRA2,NTSR1,KCNA2,CHRNA3,LYPD6,TNFRSF1A,ECEL1,ALCAM,TENM2,MDGA1,KCNA1,SLC4A11,DST,ATP1B3,SUSD2
GO:CC	cell projection	GO:0042995	FALSE	2.09233e-07	6.67937	2564	49	21	26995	CNTN1,GABRA1,GABRB2,GABRG1,NPY1R,PCDH11X,DOCK4,NTRK3,P2RY1,CLDN5,GABRA2,NTSR1,KCNA2,CHRNA3,LYPD6,TNFRSF1A,ALCAM,TENM2,KCNA1,DST,ATP1B3
GO:CC	synaptic membrane	GO:0097060	FALSE	2.2388e-07	6.64998	488	49	11	26995	CNTN1,GABRA1,GABRB2,GABRG1,NPY1R,NTRK3,P2RY1,GABRA2,KCNA2,CHRNA3,KCNA1
GO:CC	synapse	GO:0045202	FALSE	4.64854e-07	6.33268	1641	49	17	26995	CNTN1,OLFM3,GABRA1,GABRB2,GABRG1,NPY1R,NTRK3,P2RY1,CDH6,GABRA2,NTSR1,KCNA2,CHRNA3,LYPD6,MDGA1,KCNA1,DST
GO:CC	plasma membrane bounded cell projection	GO:0120025	FALSE	7.19872e-07	6.14274	2460	49	20	26995	CNTN1,GABRA1,GABRB2,GABRG1,NPY1R,PCDH11X,DOCK4,NTRK3,P2RY1,CLDN5,GABRA2,NTSR1,KCNA2,CHRNA3,LYPD6,TNFRSF1A,ALCAM,KCNA1,DST,ATP1B3
GO:CC	cell junction	GO:0030054	FALSE	1.21788e-06	5.9144	2260	49	19	26995	CNTN1,OLFM3,GABRA1,GABRB2,GABRG1,NPY1R,SDC4,NTRK3,P2RY1,CLDN5,CDH6,GABRA2,NTSR1,KCNA2,CHRNA3,LYPD6,MDGA1,KCNA1,DST
GO:CC	plasma membrane region	GO:0098590	FALSE	3.72127e-06	5.42931	1408	49	15	26995	CNTN1,GABRA1,GABRB2,PAPPA2,GABRG1,NPY1R,NTRK3,P2RY1,CLDN5,GABRA2,KCNA2,CHRNA3,KCNA1,SLC4A11,ATP1B3
GO:CC	postsynapse	GO:0098794	FALSE	6.33227e-06	5.19844	847	49	12	26995	CNTN1,GABRA1,GABRB2,GABRG1,NTRK3,P2RY1,GABRA2,NTSR1,KCNA2,CHRNA3,KCNA1,DST
GO:CC	GABA-A receptor complex	GO:1902711	FALSE	8.62252e-06	5.06437	19	49	4	26995	GABRA1,GABRB2,GABRG1,GABRA2
GO:CC	GABA receptor complex	GO:1902710	FALSE	1.32787e-05	4.87684	21	49	4	26995	GABRA1,GABRB2,GABRG1,GABRA2
GO:CC	transmembrane transporter complex	GO:1902495	FALSE	1.37701e-05	4.86106	420	49	9	26995	OLFM3,GABRA1,GABRB2,GABRG1,GABRA2,KCNA2,CHRNA3,KCNA1,ATP1B3
GO:CC	transporter complex	GO:1990351	FALSE	2.2946e-05	4.63929	446	49	9	26995	OLFM3,GABRA1,GABRB2,GABRG1,GABRA2,KCNA2,CHRNA3,KCNA1,ATP1B3
GO:CC	monoatomic ion channel complex	GO:0034702	FALSE	3.09369e-05	4.50952	329	49	8	26995	OLFM3,GABRA1,GABRB2,GABRG1,GABRA2,KCNA2,CHRNA3,KCNA1
GO:CC	axon	GO:0030424	FALSE	3.61707e-05	4.44164	801	49	11	26995	CNTN1,NPY1R,NTRK3,CLDN5,GABRA2,NTSR1,KCNA2,TNFRSF1A,ALCAM,KCNA1,DST
GO:CC	presynaptic membrane	GO:0042734	FALSE	4.33655e-05	4.36286	229	49	7	26995	CNTN1,GABRB2,NPY1R,P2RY1,GABRA2,KCNA2,KCNA1
GO:CC	dendrite	GO:0030425	FALSE	0.000278415	3.55531	783	49	10	26995	GABRA1,GABRG1,P2RY1,GABRA2,NTSR1,KCNA2,CHRNA3,LYPD6,ALCAM,KCNA1
GO:CC	dendritic tree	GO:0097447	FALSE	0.000284888	3.54533	785	49	10	26995	GABRA1,GABRG1,P2RY1,GABRA2,NTSR1,KCNA2,CHRNA3,LYPD6,ALCAM,KCNA1
GO:CC	chloride channel complex	GO:0034707	FALSE	0.000622539	3.20583	53	49	4	26995	GABRA1,GABRB2,GABRG1,GABRA2
GO:CC	somatodendritic compartment	GO:0036477	FALSE	0.000834869	3.07838	1103	49	11	26995	GABRA1,GABRG1,GAL,P2RY1,GABRA2,NTSR1,KCNA2,CHRNA3,LYPD6,ALCAM,KCNA1
GO:CC	presynapse	GO:0098793	FALSE	0.00171006	2.76699	751	49	9	26995	CNTN1,GABRB2,NPY1R,P2RY1,GABRA2,NTSR1,KCNA2,CHRNA3,KCNA1
GO:CC	membrane protein complex	GO:0098796	FALSE	0.00257558	2.58913	1242	49	11	26995	OLFM3,GABRA1,GABRB2,GABRG1,CDH6,GABRA2,KCNA2,CHRNA3,ALCAM,KCNA1,ATP1B3
GO:CC	cell body	GO:0044297	FALSE	0.00376122	2.42467	829	49	9	26995	GAL,P2RY1,GABRA2,NTSR1,KCNA2,CHRNA3,LYPD6,ALCAM,KCNA1
GO:CC	membrane raft	GO:0045121	FALSE	0.00612475	2.21291	324	49	6	26995	NTSR1,CHRNA3,LYPD6,TNFRSF1A,MDGA1,ATP1B3
GO:CC	membrane microdomain	GO:0098857	FALSE	0.00623142	2.20541	325	49	6	26995	NTSR1,CHRNA3,LYPD6,TNFRSF1A,MDGA1,ATP1B3
GO:CC	neuronal cell body	GO:0043025	FALSE	0.0124951	1.90326	743	49	8	26995	GAL,GABRA2,NTSR1,KCNA2,CHRNA3,LYPD6,ALCAM,KCNA1
GO:CC	GABA-ergic synapse	GO:0098982	FALSE	0.0175829	1.75491	123	49	4	26995	GABRA1,GABRB2,GABRA2,MDGA1
GO:CC	plasma membrane protein complex	GO:0098797	FALSE	0.0204498	1.68931	587	49	7	26995	OLFM3,CDH6,KCNA2,CHRNA3,ALCAM,KCNA1,ATP1B3
GO:CC	glutamatergic synapse	GO:0098978	FALSE	0.0262329	1.58115	611	49	7	26995	GABRB2,NPY1R,NTRK3,P2RY1,CDH6,KCNA2,KCNA1
GO:CC	dendrite membrane	GO:0032590	FALSE	0.027646	1.55837	52	49	3	26995	GABRA1,GABRG1,GABRA2
GO:CC	postsynaptic specialization	GO:0099572	FALSE	0.028191	1.54989	427	49	6	26995	GABRA1,GABRB2,P2RY1,GABRA2,CHRNA3,DST
GO:CC	extracellular region	GO:0005576	TRUE	0.0292794	1.53344	2554	49	14	26995	OLFM3,PAPPA2,EDN3,COL24A1,GAL,SDC4,S100A16,DIPK2B,LYPD6,TNFRSF1A,LRRN1,SCPEP1,SUSD2,GBP9
GO:CC	presynaptic active zone membrane	GO:0048787	FALSE	0.0326934	1.48554	55	49	3	26995	GABRB2,P2RY1,GABRA2
GO:CC	cellular anatomical entity	GO:0110165	FALSE	0.0435847	1.36067	22653	49	49	26995	CNTN1,THSD7A,OLFM3,GABRA1,GABRB2,1110032F04RIK,PAPPA2,GABRG1,PIEZO1,EDN3,GPR65,NPY1R,PCDH11X,COL24A1,GAL,LIX1,SDC4,PTPRB,DOCK4,NTRK3,MAN1A,S100A16,P2RY1,CLDN5,NACC2,CDH6,ADGRL4,LRP1B,DIPK2B,GABRA2,NTSR1,KCNA2,CHRNA3,LYPD6,TNFRSF1A,ECEL1,LRRN1,ALCAM,TENM2,SCPEP1,MDGA1,KCNA1,SLC4A11,DST,ATP1B3,DOK2,SUSD2,NDST3,GBP9
GO:CC	postsynaptic specialization membrane	GO:0099634	FALSE	0.0462018	1.33534	158	49	4	26995	GABRA1,GABRB2,GABRA2,CHRNA3
GO:CC	juxtaparanode region of axon	GO:0044224	FALSE	0.0498973	1.30192	12	49	2	26995	KCNA2,KCNA1
KEGG	Neuroactive ligand-receptor interaction	KEGG:04080	FALSE	3.20111e-08	7.4947	389	23	11	9330	GABRA1,GABRB2,GABRG1,EDN3,NPY1R,GAL,P2RY1,GABRA2,NTSR1,CHRNA3,LYPD6
KEGG	Nicotine addiction	KEGG:05033	FALSE	0.000156231	3.80623	40	23	4	9330	GABRA1,GABRB2,GABRG1,GABRA2
KEGG	GABAergic synapse	KEGG:04727	FALSE	0.00385296	2.41421	89	23	4	9330	GABRA1,GABRB2,GABRG1,GABRA2
KEGG	Morphine addiction	KEGG:05032	FALSE	0.00402558	2.39517	90	23	4	9330	GABRA1,GABRB2,GABRG1,GABRA2
KEGG	Retrograde endocannabinoid signaling	KEGG:04723	FALSE	0.0267996	1.57187	147	23	4	9330	GABRA1,GABRB2,GABRG1,GABRA2
REAC	Neuronal System	REAC:R-MMU-112316	FALSE	0.00596626	2.2243	307	25	7	8405	GABRA1,GABRB2,NTRK3,GABRA2,KCNA2,CHRNA3,KCNA1
WP	GPCRs non odorant	WP:WP1396	FALSE	0.041477	1.38219	265	15	5	4496	GPR65,NPY1R,P2RY1,ADGRL4,NTSR1
